# Supplementary material
Source: publisher figshare collection journal article supplement (https://rs.figshare.com/ndownloader/files/13696505)
Supplement: Supplementary file 1 [file 13696505]

## Sheet: Identifications
Age-related response to an acute innate immune challenge in mice: proteomics reveals a telomere maintenance-related cost.
François Criscuolo1‡, Gabriele Sorci2, Margaux Behaim-Delarbre1, Sandrine Zahn1, Bruno Faivre2 and Fabrice Bertile1‡
1Université de Strasbourg, CNRS, IPHC UMR 7178, 67000 Strasbourg, France.
1Université de Strasbourg, CNRS, IPHC UMR 7178, 67000 Strasbourg, France.
2Biogéosciences, CNRS UMR 6282, Université Bourgogne Franche-Comté, Dijon, France.
‡Authors for correspondence (francois.criscuolo@iphc.cnrs.fr, fbertile@unistra.fr)
Table S2
Data obtained from a label-free (Xics) experiment performed on mice (3 months-old and 1-year-old) spleen after injection of either LPS or PBS
Mice groups were young PBS (J1 to J6), old PBS (V1 to V6), young LPS (J7 to J12), and old LPS (V7 to V12)
																																													### These columns have been generated using the GeneOntology tool developped by the bioinformatic team of IPHC LSMBO ### The GeneOntology database used is 'assocdb' and its release date is 2015-06 ### The evidence codes definitions can be found here : http://www.geneontology.org/GO.evidence.shtml ### Warning ! This file contains some very long URLs that may be truncated by Internet Explorer ###An…
	Information retrieved from Andromeda engine-derived identifications																																													Accession number and corresponding names and synonym names of entries found in the UniProtKB database
Identification N°	Protein group (eventually contains isoforms)	Majority protein Ids (main protein in the protein group)	Peptides (majority protein)	Peptide counts (all)	Peptide counts (razor+unique)	Peptide counts (unique)	Accession number	Number of proteins in protein group	Number of Peptides	Number of Razor + unique peptides	Number of Unique peptides	Sequence coverage [%]	Unique + razor sequence coverage [%]	Unique sequence coverage [%]	Mol. weight [kDa]	Sequence length	Protein Score	Sequence coverage J1 [%]	Sequence coverage J10 [%]	Sequence coverage J11 [%]	Sequence coverage J12 [%]	Sequence coverage J2 [%]	Sequence coverage J3 [%]	Sequence coverage J4 [%]	Sequence coverage J5 [%]	Sequence coverage J6 [%]	Sequence coverage J7 [%]	Sequence coverage J8 [%]	Sequence coverage J9 [%]	Sequence coverage V1 [%]	Sequence coverage V10 [%]	Sequence coverage V11 [%]	Sequence coverage V12 [%]	Sequence coverage V2 [%]	Sequence coverage V3 [%]	Sequence coverage V4 [%]	Sequence coverage V5 [%]	Sequence coverage V6 [%]	Sequence coverage V7 [%]	Sequence coverage V8 [%]	Sequence coverage V9 [%]	Potential contaminant	Carbamidomethyl (C) site positions	Oxidation (M) site positions	Identifier used	NCBI protein accession number	GeneID	Symbol	UniProt accession number
1	[Protein ADP-ribosylarginine] hydrolase OS=Mus musculus GN=Adprh PE=2 SV=1	[Protein ADP-ribosylarginine] hydrolase OS=Mus musculus GN=Adprh PE=2 SV=1	ALYSLGSKEDPVLDP-DGETIHQQLAQMGDLEAIDVAR-EDPVLDP-GILDGNSAPVFPQPFGVK-GVNPANYEK-LYSLLAK-SPWQWGK-YITQSGYFVK-YVAAMVLSAAGDTLGYFNGK	9	9	9	>sp|P54923|ADPRH_MOUSE [Protein ADP-ribosylarginine] hydrolase OS=Mus musculus GN=Adprh PE=2 SV=1	1	9	9	9	29.8	29.8	29.8	40.068	362	15.198	27.9	17.7	16.3	14.4	25.1	17.1	14.1	13.5	9.4	19.3	27.9	25.1	9.4	6.9	17.1	19.9	5	17.1	9.4	17.1	10.2	11.6	25.1	13.5			45	P54923	1703393	11544	Adprh	P54923
2	[Pyruvate dehydrogenase (acetyl-transferring)] kinase isozyme 1, mitochondrial OS=Mus musculus GN=Pdk1 PE=1 SV=2	[Pyruvate dehydrogenase (acetyl-transferring)] kinase isozyme 1, mitochondrial OS=Mus musculus GN=Pdk1 PE=1 SV=2	ALSTESVER-AVPLAGFGYGLPISR-EISLLPDNLLR-LYAQYFQGDLK-TIYEFTDTVIR	5	5	5	>sp|Q8BFP9|PDK1_MOUSE [Pyruvate dehydrogenase (acetyl-transferring)] kinase isozyme 1, mitochondrial OS=Mus musculus GN=Pdk1 PE=1 SV=2	1	5	5	5	13.1	13.1	13.1	48.994	434	4.891	0	6	6	6	2.5	3.5	6	6	9.7	3.5	6	2.5	3.5	3.5	0	2.5	0	8.1	3.5	2.5	0	5.5	3.5	0				Q8BFP9	341941240	228026	Pdk1	Q8BFP9
3	[Pyruvate dehydrogenase (acetyl-transferring)] kinase isozyme 3, mitochondrial OS=Mus musculus GN=Pdk3 PE=1 SV=1	[Pyruvate dehydrogenase (acetyl-transferring)] kinase isozyme 3, mitochondrial OS=Mus musculus GN=Pdk3 PE=1 SV=1	AAPLAGFGYGLPISR-ALSSESFER-FSPSPLSIK-ISDLGGGVPLR-TTPEADDWSNPSSEPR-VLDNFLNVLINIR	6	6	6	>sp|Q922H2|PDK3_MOUSE [Pyruvate dehydrogenase (acetyl-transferring)] kinase isozyme 3, mitochondrial OS=Mus musculus GN=Pdk3 PE=1 SV=1	1	6	6	6	17.6	17.6	17.6	47.922	415	12.613	3.6	8.4	3.6	3.6	6.3	3.6	6.3	3.6	6.3	5.8	8.4	3.6	3.6	3.6	5.8	3.6	0	3.6	6.3	13.3	3.6	3.6	3.6	0				Q922H2	61214393	236900	Pdk3	Q922H2
4	1,5-anhydro-D-fructose reductase OS=Mus musculus GN=Akr1e2 PE=1 SV=1	1,5-anhydro-D-fructose reductase OS=Mus musculus GN=Akr1e2 PE=1 SV=1	LAINLGYR-LIDFCHK-NLIVIPK	3	3	3	>sp|Q9DCT1|AKCL2_MOUSE 1,5-anhydro-D-fructose reductase OS=Mus musculus GN=Akr1e2 PE=1 SV=1	1	3	3	3	7.3	7.3	7.3	34.46	301	2.5189	5	0	0	2.7	2.7	0	0	0	2.7	2.7	0	0	2.7	2.7	0	0	2.7	0	0	5	2.7	2.7	2.7	2.7		191		Q9DCT1	20531984	56043	Akr1e2	Q9DCT1
5	10 kDa heat shock protein, mitochondrial OS=Mus musculus GN=Hspe1 PE=1 SV=2	10 kDa heat shock protein, mitochondrial OS=Mus musculus GN=Hspe1 PE=1 SV=2	FLPLFDR-GGIMLPEK-SGEIEPVSVK-VLLPEYGGTK-VLQATVVAVGSGGK-VVLDDKDYFLFR	6	6	6	>sp|Q64433|CH10_MOUSE 10 kDa heat shock protein, mitochondrial OS=Mus musculus GN=Hspe1 PE=1 SV=2	1	6	6	6	59.8	59.8	59.8	10.963	102	56.245	45.1	43.1	52.9	43.1	45.1	42.2	36.3	35.3	35.3	35.3	52.9	45.1	45.1	43.1	19.6	35.3	39.2	52.9	43.1	52.9	21.6	45.1	45.1	52.9			32	Q64433	2493662	15528	Hspe1	Q64433
6	116 kDa U5 small nuclear ribonucleoprotein component OS=Mus musculus GN=Eftud2 PE=2 SV=1	116 kDa U5 small nuclear ribonucleoprotein component OS=Mus musculus GN=Eftud2 PE=2 SV=1	AFIPAIDSFGFETDLR-DSIVQGFQWGTR-FNTTSVIK-GHVTQDAPIPGSPLYTIK-GLSEDVSISK-IAVEPVNPSELPK-ILAQVVGDVDTSLPR-IYADTFGDINYQEFAK-LGEFFQTK-LWISVAR-SFVEFILEPLYK-SIWAFGPDATGPNILVDDTLPSEVDK-SIWAFGPDATGPNILVDDTLPSEVDKALLGSVK-STPVTVVLPDTK-SYPSLTTK-VPAGNWVLIEGVDQPIVK-YDWDLLAAR-YYPTAEEVYGPEVETIVQEEDTQPLTEPIIKPVK	19	18	18	>sp|O08810|U5S1_MOUSE 116 kDa U5 small nuclear ribonucleoprotein component OS=Mus musculus GN=Eftud2 PE=2 SV=1	1	19	18	18	26.7	25.6	25.6	109.36	971	97.863	25.1	20.7	21.5	14.4	18.8	16.2	23.2	20.7	18.6	14.3	18.8	14.5	11.5	10.6	18.6	20.7	11.6	5.3	11.4	22.2	18.3	16.2	22.1	21.3				O08810	18201957	20624	Eftud2	O08810
7	14-3-3 protein beta/alpha OS=Mus musculus GN=Ywhab PE=1 SV=3	14-3-3 protein beta/alpha OS=Mus musculus GN=Ywhab PE=1 SV=3	AVTEQGHELSNEER-DNLTLWTSENQGDEGDAGEGEN-QTTVSNSQQAYQEAFEISK-QTTVSNSQQAYQEAFEISKK-TAFDEAIAELDTLNEESYK-TAFDEAIAELDTLNEESYKDSTLIMQLLR-YLILNATQAESK-YLSEVASGENK-YLSEVASGENKQTTVSNSQQAYQEAFEISK-YDDMAAAMK	14	10	9	>sp|Q9CQV8|1433B_MOUSE 14-3-3 protein beta/alpha OS=Mus musculus GN=Ywhab PE=1 SV=3	1	14	10	9	56.9	47.6	43.9	28.086	246	323.31	44.3	33.7	46.7	54.5	43.1	54.5	20.7	54.5	48	56.9	56.5	52.4	45.5	47.2	37.8	45.5	46.7	56.9	50.8	45.5	54.5	54.5	54.5	54.5			24;28;162;220	Q9CQV8	18202836	54401	Ywhab	Q9CQV8
8	14-3-3 protein epsilon OS=Mus musculus GN=Ywhae PE=1 SV=1	14-3-3 protein epsilon OS=Mus musculus GN=Ywhae PE=1 SV=1	AAFDDAIAELDTLSEESYK-AAFDDAIAELDTLSEESYKDSTLIMQLLR-AASDIAMTELPPTHPIR-DNLTLWTSDMQGDGEEQNKEALQDVEDENQ-EAAENSLVAYK-EALQDVEDENQ-HLIPAANTGESK-IISSIEQK-IISSIEQKEENK-KEAAENSLVAYK-LICCDILDVLDK-LICCDILDVLDKHLIPAANTGESK-QMVETELK-VAGMDVELTVEER-YLAEFATGNDR-YLAEFATGNDRK	18	16	16	>sp|P62259|1433E_MOUSE 14-3-3 protein epsilon OS=Mus musculus GN=Ywhae PE=1 SV=1	1	18	16	16	64.3	61.2	61.2	29.174	255	315.68	52.5	37.3	52.2	50.2	42.7	64.3	25.1	57.6	52.5	51	51	64.3	44.3	45.5	31.8	52.5	52.5	56.1	40.4	64.3	47.8	45.9	64.3	56.1		97;98	33;88;160;221;235	P62259	60391192	22627	Ywhae	P62259
9	14-3-3 protein eta OS=Mus musculus GN=Ywhah PE=1 SV=2	14-3-3 protein eta OS=Mus musculus GN=Ywhah PE=1 SV=2	AVTELNEPLSNEDR-AVTELNEPLSNEDRNLLSVAYK-DNLTLWTSDQQDEEAGEGN-EAFEISK-ELETVCNDVLALLDK-KNSVVEASEAAYK-NCNDFQYESK-NSVVEASEAAYK-NSVVEASEAAYKEAFEISK-QAFDDAIAELDTLNEDSYK-YDDMASAMK-YLAEVASGEK-YLAEVASGEKK	16	13	13	>sp|P68510|1433F_MOUSE 14-3-3 protein eta OS=Mus musculus GN=Ywhah PE=1 SV=2	1	16	13	13	56.9	50.4	50.4	28.211	246	323.31	49.2	16.3	35.4	43.1	32.9	38.6	15.4	46.7	45.1	37.8	41.5	45.5	31.7	34.6	21.1	39	43.1	49.2	35	46.3	43.1	43.1	46.7	50.4		97;112	27;223	P68510	55976655	22629	Ywhah	P68510
10	14-3-3 protein gamma OS=Mus musculus GN=Ywhag PE=1 SV=2	14-3-3 protein gamma OS=Mus musculus GN=Ywhag PE=1 SV=2	DNLTLWTSDQQDDDGGEGNN-ELEAVCQDVLSLLDNYLIK-NVTELNEPLSNEER-TAFDDAIAELDTLNEDSYK-YLAEVATGEK-YLAEVATGEKR	10	6	6	>sp|P61982|1433G_MOUSE 14-3-3 protein gamma OS=Mus musculus GN=Ywhag PE=1 SV=2	1	10	6	6	47	33.6	33.6	28.302	247	307.92	43.3	17	21.1	36.8	36.8	36.4	6.9	28.7	31.6	31.2	39.3	39.3	31.2	17.4	21.1	36.4	28.7	39.3	17.4	28.7	44.5	28.7	36.4	36.8		97	23;27;223	P61982	48428722	22628	Ywhag	P61982
11	14-3-3 protein sigma OS=Mus musculus GN=Sfn PE=1 SV=2	14-3-3 protein sigma OS=Mus musculus GN=Sfn PE=1 SV=2	VLSSIEQK	3	1	1	>sp|O70456|1433S_MOUSE 14-3-3 protein sigma OS=Mus musculus GN=Sfn PE=1 SV=2	1	3	1	1	10.5	3.2	3.2	27.706	248	52.815	10.5	6.5	10.5	10.5	10.5	10.5	3.2	10.5	10.5	10.5	10.5	10.5	10.5	10.5	10.5	10.5	10.5	10.5	10.5	10.5	10.5	10.5	10.5	10.5			220	O70456	338817846	55948	Sfn	O70456
12	14-3-3 protein theta OS=Mus musculus GN=Ywhaq PE=1 SV=1	14-3-3 protein theta OS=Mus musculus GN=Ywhaq PE=1 SV=1	AVTEQGAELSNEER-AVTEQGAELSNEERNLLSVAYK-KQTIENSQGAYQEAFDISK-QTIENSQGAYQEAFDISK-QTIENSQGAYQEAFDISKK-SICTTVLELLDK-TAFDEAIAELDTLNEDSYK-YLAEVACGDDR-YLAEVACGDDRK-YLIANATNPESK	13	10	10	>sp|P68254|1433T_MOUSE 14-3-3 protein theta OS=Mus musculus GN=Ywhaq PE=1 SV=1	1	13	10	10	46.9	39.2	39.2	27.778	245	323.31	46.9	21.2	39.2	46.5	30.6	46.9	6.9	46.9	46.9	46.9	46.9	41.2	38.4	26.1	21.6	46.9	39.2	46.5	42	46.9	46.9	42	46.9	46.9		94;134	160;218	P68254	68566157	102634437	Ywhaq	P68254
13	14-3-3 protein zeta/delta OS=Mus musculus GN=Ywhaz PE=1 SV=1	14-3-3 protein zeta/delta OS=Mus musculus GN=Ywhaz PE=1 SV=1	DSTLIMQLLR-NLLSVAYK-NLLSVAYKNVVGAR-EMQPTHPIR-DICNDVLSLLEK-DNLTLWTSDTQGDEAEAGEGGEN-EKIETELR-FLIPNASQPESK-GIVDQSQQAYQEAFEISK-GIVDQSQQAYQEAFEISKK-IETELRDICNDVLSLLEK-KGIVDQSQQAYQEAFEISK-LAEQAERYDDMAACMK-SVTEQGAELSNEER-SVTEQGAELSNEERNLLSVAYK-TAFDEAIAELDTLSEESYK-TAFDEAIAELDTLSEESYKDSTLIMQLLR-VVSSIEQK-VVSSIEQKTEGAEK-YDDMAACMK-YLAEVAAGDDK-YLAEVAAGDDKK	22	22	18	>sp|P63101|1433Z_MOUSE 14-3-3 protein zeta/delta OS=Mus musculus GN=Ywhaz PE=1 SV=1	1	22	22	18	74.3	74.3	68.2	27.771	245	323.31	69	47.3	68.6	68.6	55.9	65.7	42	68.6	73.5	58.8	65.7	65.7	62	59.6	51.4	48.6	61.2	65.7	58.4	63.3	66.1	68.6	65.7	68.6		25;94	22;26;160;218	P63101	52000885	22631	Ywhaz	P63101
14	15 kDa selenoprotein OS=Mus musculus GN=Sep15 PE=1 SV=3	15 kDa selenoprotein OS=Mus musculus GN=Sep15 PE=1 SV=3	FPQVQAFVR-LLDDNGNIAEELSILK-WNTDSVEEFLSEK	3	3	3	>sp|Q9ERR7|SEP15_MOUSE 15 kDa selenoprotein OS=Mus musculus GN=Sep15 PE=1 SV=3	1	3	3	3	23.5	23.5	23.5	17.806	162	9.5963	9.9	17.9	8	9.9	5.6	23.5	23.5	15.4	5.6	17.9	5.6	15.4	15.4	23.5	23.5	9.9	15.4	15.4	23.5	23.5	15.4	23.5	15.4	15.4				Q9ERR7	190358774	93684	Sep15	Q9ERR7
15	15-hydroxyprostaglandin dehydrogenase [NAD(+)] OS=Mus musculus GN=Hpgd PE=2 SV=1	15-hydroxyprostaglandin dehydrogenase [NAD(+)] OS=Mus musculus GN=Hpgd PE=2 SV=1	GIHFQDYDISPLLVK-LDILVNNAGVNNEK-VALVTGAAQGIGK	3	3	3	>sp|Q8VCC1|PGDH_MOUSE 15-hydroxyprostaglandin dehydrogenase [NAD(+)] OS=Mus musculus GN=Hpgd PE=2 SV=1	1	3	3	3	15.6	15.6	15.6	29.18	269	10.657	15.6	0	0	5.6	15.6	15.6	0	15.6	15.6	0	0	0	5.6	4.8	0	5.6	10.4	10.4	0	15.6	15.6	0	0	0				Q8VCC1	81901849	15446	Hpgd	Q8VCC1
16	17-beta-hydroxysteroid dehydrogenase 13 OS=Mus musculus GN=Hsd17b13 PE=1 SV=2	17-beta-hydroxysteroid dehydrogenase 13 OS=Mus musculus GN=Hsd17b13 PE=1 SV=2	AEIYNSVDQVK-AEIYNSVDQVKR-ALTAELDTLGK-EVGDVEIVVNNAGAIYPADLLSAK-EVGDVEIVVNNAGAIYPADLLSAKDEEITK-KSVTGQTVLITGAGHGIGR-LWPVLEPEEVAR-SLINGILTNK-SVTGQTVLITGAGHGIGR-LTAYEFAK-LVLWDINK	11	11	9	>sp|Q8VCR2|DHB13_MOUSE 17-beta-hydroxysteroid dehydrogenase 13 OS=Mus musculus GN=Hsd17b13 PE=1 SV=2	1	11	11	9	36.2	36.2	30.9	33.458	304	20.165	5.3	5.3	9.2	0	5.3	16.4	13.8	8.6	0	16.1	3.9	5.3	2.6	10.5	35.9	2.6	5.3	2.6	5.3	2.6	2.6	2.6	30.9	23.4				Q8VCR2	408360051	243168	Hsd17b13	Q8VCR2
17	1-phosphatidylinositol 4,5-bisphosphate phosphodiesterase beta-3 OS=Mus musculus GN=Plcb3 PE=2 SV=2	1-phosphatidylinositol 4,5-bisphosphate phosphodiesterase beta-3 OS=Mus musculus GN=Plcb3 PE=2 SV=2	DDLIASILSEVTPTPLEELR-SFDPFTEVIVDGIVANALR	2	2	2	>sp|P51432|PLCB3_MOUSE 1-phosphatidylinositol 4,5-bisphosphate phosphodiesterase beta-3 OS=Mus musculus GN=Plcb3 PE=2 SV=2	1	2	2	2	3.2	3.2	3.2	139.49	1234	6.1371	0	0	1.5	1.5	0	0	1.5	1.5	0	0	0	0	0	0	0	1.5	0	0	0	3.2	0	0	1.5	1.5				P51432	341941271	---	Plcb3	P51432
18	1-phosphatidylinositol 4,5-bisphosphate phosphodiesterase gamma-2 OS=Mus musculus GN=Plcg2 PE=1 SV=1	1-phosphatidylinositol 4,5-bisphosphate phosphodiesterase gamma-2 OS=Mus musculus GN=Plcg2 PE=1 SV=1	AFVFILEPK-CAEFELR-DGAFLIR-DINSLYDVSR-DSSVFILGNTDRPDASAVYLQDFQR-EFNVNENQLQLYQEK-EGTNSYAITFR-FLLHEQQELWAQDLNK-GILDLNTYNVVK-LLQEYCAETGAK-LRYPVTPELLER-LSFGDDIEQAVEEEPVQDTPPTELHFGEK-NQSIAIELSDLVVYCKPTSK-QIIEDNPLGSLCK-SESSTEAYIR-TILPLVNFK-TTVVNDNGLSPVWAPTQEK-VEELFEWFQSIR-VTFEIYDPNLAFLR-YPVTPELLER-DGTFLVR	21	21	20	>sp|Q8CIH5|PLCG2_MOUSE 1-phosphatidylinositol 4,5-bisphosphate phosphodiesterase gamma-2 OS=Mus musculus GN=Plcg2 PE=1 SV=1	1	21	21	20	21.3	21.3	20.7	147.59	1265	73.931	8.2	9.8	11.1	13.3	11.5	10.6	11.5	12	11.1	10.1	13.9	9.2	9.4	5.2	11.1	11.5	8.5	8.1	9.1	8.4	5.6	10	16.2	9.2		551;624;849;937		Q8CIH5	81878210	234779	Plcg2	Q8CIH5
19	2',3'-cyclic-nucleotide 3'-phosphodiesterase OS=Mus musculus GN=Cnp PE=1 SV=3	2',3'-cyclic-nucleotide 3'-phosphodiesterase OS=Mus musculus GN=Cnp PE=1 SV=3	AAGAEEYAQQEVVK-AAGAEEYAQQEVVKR-AGQVFLEELGNHK-AHVTLGCAADVQPVQTGLDLLDILQQVK-AIFTGYYGK-DFLPLYFGWFLTK-EKPELQFPFLQDEDTVATLHECK-GGSQGEAVGELPR-LELVSYFGK-LSISALFVTPK-NQWQLSADDLKK-TAGAQVVLTDQELQLWPSDLDKPSASEGLPPGSR-VLVLDDTNHER	13	13	13	>sp|P16330|CN37_MOUSE 2,3-cyclic-nucleotide 3-phosphodiesterase OS=Mus musculus GN=Cnp PE=1 SV=3	1	13	13	13	45.5	45.5	45.5	47.123	420	60.205	22.6	10.7	14	13.1	11.2	17.4	21.2	16.9	17.1	7.4	37.6	7.9	11.4	10.5	19	25.2	0	4.8	10	15.5	7.9	6.2	10.5	17.1		49;334		P16330	51338761	12799	Cnp	P16330
20	2,4-dienoyl-CoA reductase, mitochondrial OS=Mus musculus GN=Decr1 PE=1 SV=1	2,4-dienoyl-CoA reductase, mitochondrial OS=Mus musculus GN=Decr1 PE=1 SV=1	EEWDIIEGLIR-FNIIQPGPIK-LTPNGWK-SLAAEWGR-VAFITGGGTGLGK-VAGHPDVVINNAAGNFISPSER-VTKEEWDIIEGLIR	7	7	7	>sp|Q9CQ62|DECR_MOUSE 2,4-dienoyl-CoA reductase, mitochondrial OS=Mus musculus GN=Decr1 PE=1 SV=1	1	7	7	7	22.1	22.1	22.1	36.213	335	44.75	19.7	5.4	15.8	9.6	15.8	13.4	3.9	9.6	13.4	14.6	17.6	15.8	20	16.1	16.7	13.4	13.4	17.6	9.6	13.7	9.6	13.4	15.8	13.4				Q9CQ62	67460423	67460	Decr1	Q9CQ62
21	2'-5'-oligoadenylate synthase 1A OS=Mus musculus GN=Oas1a PE=2 SV=2	2'-5'-oligoadenylate synthase 1A OS=Mus musculus GN=Oas1a PE=2 SV=2	ARPVILDPADPTGNVAGGNPEGWR-FIEDYLLPDTTFGADVK-GKSDADLVVFLNNLTSFEDQLNR-QLYEVQHER-SDADLVVFLNNLTSFEDQLNR-YYDFQHQEVSKYLHR	6	6	6	>sp|P11928|OAS1A_MOUSE 2-5-oligoadenylate synthase 1A OS=Mus musculus GN=Oas1a PE=2 SV=2	1	6	6	6	24	24	24	42.428	367	11.531	6.5	9	9	9	0	9	2.5	6.5	0	6.5	11.2	9	0	0	0	6.3	0	0	0	16.9	0	6.5	12.8	2.5				P11928	341941206	246730	Oas1a	P11928
23	2'-5'-oligoadenylate synthase-like protein 1 OS=Mus musculus GN=Oasl1 PE=2 SV=1	2'-5'-oligoadenylate synthase-like protein 1 OS=Mus musculus GN=Oasl1 PE=2 SV=1	GQRPIILDPADPTNNVAEGYR-LDSFVAQWLQPTR	2	2	2	>sp|Q8VI94|OASL1_MOUSE 2-5-oligoadenylate synthase-like protein 1 OS=Mus musculus GN=Oasl1 PE=2 SV=1	1	2	2	2	6.7	6.7	6.7	59.088	511	9.9985	0	4.1	4.1	0	0	0	0	0	0	4.1	6.7	6.7	0	0	0	4.1	0	0	0	0	0	0	4.1	4.1				Q8VI94	81879448	231655	Oasl1	Q8VI94
24	2'-5'-oligoadenylate synthase-like protein 2 OS=Mus musculus GN=Oasl2 PE=1 SV=2	2'-5'-oligoadenylate synthase-like protein 2 OS=Mus musculus GN=Oasl2 PE=1 SV=2	DSKPAPAIYETLIR-GDRPIILDPADPTNNLGR	2	2	2	>sp|Q9Z2F2|OASL2_MOUSE 2-5-oligoadenylate synthase-like protein 2 OS=Mus musculus GN=Oasl2 PE=1 SV=2	1	2	2	2	6.3	6.3	6.3	58.767	508	5.33	0	6.3	2.8	0	0	0	0	0	0	2.8	2.8	6.3	0	0	0	2.8	0	0	2.8	0	0	0	2.8	6.3				Q9Z2F2	403314377	23962	Oasl2	Q9Z2F2
25	26S protease regulatory subunit 10B OS=Mus musculus GN=Psmc6 PE=1 SV=1	26S protease regulatory subunit 10B OS=Mus musculus GN=Psmc6 PE=1 SV=1	ALQSVGQIVGEVLK-AVASQLDCNFLK-ELREVIELPLTNPELFQR-EVDPLVYNMSHEDPGNVSYSEIGGLSEQIR-EVIELPLTNPELFQR-FSEGTSADREIQR-GCLLYGPPGTGK-HGEIDYEAIVK-LSDGFNGADLR-TLMELLNQMDGFDTLHR-VVSSSIVDK-VVSSSIVDKYIGESAR	12	12	12	>sp|P62334|PRS10_MOUSE 26S protease regulatory subunit 10B OS=Mus musculus GN=Psmc6 PE=1 SV=1	1	12	12	12	39.6	39.6	39.6	44.172	389	105.76	24.4	18.3	18	18.5	21.6	12.3	18.5	21.6	18.3	21.3	29	21.6	18	17.5	15.2	18	3.6	18.3	21.1	36.2	17.2	24.4	24.4	10.5		170;193		P62334	55977306	67089	Psmc6	P62334
26	26S protease regulatory subunit 4 OS=Mus musculus GN=Psmc1 PE=1 SV=1	26S protease regulatory subunit 4 OS=Mus musculus GN=Psmc1 PE=1 SV=1	APQETYADIGGLDNQIQEIK-AVANQTSATFLR-IEFPLPDEK-IETLDPALIRPGR-IKDYLLMEEEFIR-TMLELLNQLDGFDSR-VAEEHAPSIVFIDEIDAIGTK-VAEEHAPSIVFIDEIDAIGTKR-VVGSELIQK	9	9	9	>sp|P62192|PRS4_MOUSE 26S protease regulatory subunit 4 OS=Mus musculus GN=Psmc1 PE=1 SV=1	1	9	9	9	25.7	25.7	25.7	49.184	440	163.41	19.5	19.3	19.1	19.1	18.4	19.1	9.5	17.3	18.6	23.6	19.8	22.5	16.4	4.8	14.5	22.5	20.7	17	15.2	25.5	15.2	18	20.7	15				P62192	49065818	19179	Psmc1	P62192
27	26S protease regulatory subunit 6A OS=Mus musculus GN=Psmc3 PE=1 SV=2	26S protease regulatory subunit 6A OS=Mus musculus GN=Psmc3 PE=1 SV=2	AMEVDERPTEQYSDIGGLDK-APSIIFIDELDAIGTK-CTDDFNGAQCK-DAFALAK-DSYLILETLPTEYDSR-EKAPSIIFIDELDAIGTK-KMNVSPDVNYEELAR-LKPGDLVGVNKDSYLILETLPTEYDSR-LLDSEIK-QIQELVEAIVLPMNHK-QTYFLPVIGLVDAEK-TLPYLVSNVIELLDVDPNDQEEDGANIDLDSQR-TMLELLNQLDGFQPNTQVK-VDILDPALLR-VIAATNRVDILDPALLR	15	15	15	>sp|O88685|PRS6A_MOUSE 26S protease regulatory subunit 6A OS=Mus musculus GN=Psmc3 PE=1 SV=2	1	15	15	15	46.4	46.4	46.4	49.548	442	216.94	28.7	17	18.3	20.8	27.6	19.9	23.3	23.3	20.8	19.2	32.1	23.3	14.9	10.9	19.2	22.4	9.7	15.8	19.2	38.7	20.8	19.2	27.6	19.5		390;399	376	O88685	341941732	19182	Psmc3	O88685
28	26S protease regulatory subunit 6B OS=Mus musculus GN=Psmc4 PE=1 SV=2	26S protease regulatory subunit 6B OS=Mus musculus GN=Psmc4 PE=1 SV=2	ADTLDPALLRPGR-EAVELPLTHFELYK-ENAPAIIFIDEIDAIATK-ENAPAIIFIDEIDAIATKR-FDAQTGADR-ILLELLNQMDGFDQNVNVK-IQDEIPALSVSRPQTGLSFLGPEPEDLEDLYSR-IQSIPLVIGQFLEAVDQNTAIVGSTTGSNYYVR-LAKENAPAIIFIDEIDAIATK-LIFSTITSK-LQQELEFLEVQEEYIKDEQK-VVGSEFVQK	12	12	12	>sp|P54775|PRS6B_MOUSE 26S protease regulatory subunit 6B OS=Mus musculus GN=Psmc4 PE=1 SV=2	1	12	12	12	43.3	43.3	43.3	47.408	418	98.863	25.8	4.3	8.6	23	25.6	25.8	21.3	24.6	28	12.9	34.7	28	8.6	3.3	20.8	30.6	5.3	9.8	18.4	39	4.3	12	24.9	30.9				P54775	341941734	23996	Psmc4	P54775
29	26S protease regulatory subunit 7 OS=Mus musculus GN=Psmc2 PE=1 SV=5	26S protease regulatory subunit 7 OS=Mus musculus GN=Psmc2 PE=1 SV=5	ACLIFFDEIDAIGGAR-ALDEGDIALLK-ESDTGLAPPALWDLAADKQTLQSEQPLQVAR-EVVETPLLHPER-FDDGAGGDNEVQR-FVNLGIEPPK-FVNLGIEPPKGVLLFGPPGTGK-FVVDLSDQVAPTDIEEGMR-GVLLFGPPGTGK-IATEKDFLEAVNK-IEFSLPDLEGR-IINADSEDPK-IINADSEDPKYIINVK-INELTGIK-KIEFSLPDLEGR-LCPNSTGAEIR-QVEDDIQQLLK-TMLELINQLDGFDPR-TYGQSTYSR-VIGSELVQK	20	20	20	>sp|P46471|PRS7_MOUSE 26S protease regulatory subunit 7 OS=Mus musculus GN=Psmc2 PE=1 SV=5	1	20	20	20	52.7	52.7	52.7	48.647	433	74.739	30.9	22.6	25.4	27.3	33.3	26.8	32.8	35.6	34.9	24.9	30.5	33.3	17.3	12	29.8	16.4	4.8	11.1	27.3	41.6	31.6	20.8	27.9	25.9		270;377	138;299	P46471	20532410	---	Psmc2	P46471
30	26S protease regulatory subunit 8 OS=Mus musculus GN=Psmc5 PE=1 SV=1	26S protease regulatory subunit 8 OS=Mus musculus GN=Psmc5 PE=1 SV=1	EHAPSIIFMDEIDSIGSSR-EVIELPVKHPELFEALGIAQPK-FVVDVDKNIDINDVTPNCR-GVLLYGPPGTGK-IDILDSALLRPGR-LEGGSGGDSEVQR-LLREELQLLQEQGSYVGEVVR-TMLELLNQLDGFEATK-VPDSTYEMIGGLDK-VSGSELVQK	10	10	10	>sp|P62196|PRS8_MOUSE 26S protease regulatory subunit 8 OS=Mus musculus GN=Psmc5 PE=1 SV=1	1	10	10	10	38.9	38.9	38.9	45.626	406	73.098	30	10.1	9.4	11.6	35.5	20.2	14.8	20.9	21.4	20.2	31.5	18.7	16.3	8.6	11.6	20	3	20.7	11.6	33.3	3	9.4	30.8	6.2		112	248	P62196	49065820	19184	Psmc5	P62196
31	26S proteasome non-ATPase regulatory subunit 1 OS=Mus musculus GN=Psmd1 PE=1 SV=1	26S proteasome non-ATPase regulatory subunit 1 OS=Mus musculus GN=Psmd1 PE=1 SV=1	AAVESLGFILFR-DNLEWLAR-DTSEDVEELVEPVAAHGPK-IEEEEQEPEPPEPFEYIDD-LLHVAVSDVNDDVR-NAQAIEDMVGYAQETQHEK-QAIGIALETR-QDVYDLLK-QFAALVASK-QGALIASALIMIQQTEITCPK-TNLYQDDAVTGEAAGLALGLVMLGSK-TPEQCPSVVSLLSESYNPHVR-VSTAVLSITAK-YQPFKPLSIGGIIILK	14	14	14	>sp|Q3TXS7|PSMD1_MOUSE 26S proteasome non-ATPase regulatory subunit 1 OS=Mus musculus GN=Psmd1 PE=1 SV=1	1	14	14	14	22.4	22.4	22.4	105.73	953	90.066	21.3	9.7	7.8	10.5	12.9	13.7	14.5	14.9	7.7	11.6	8.3	11.5	8.8	4	6.5	12.8	10.2	7.7	14.8	17.2	8.6	11.4	22.4	13.7		633;703		Q3TXS7	91207411	70247	Psmd1	Q3TXS7
32	26S proteasome non-ATPase regulatory subunit 10 OS=Mus musculus GN=Psmd10 PE=1 SV=3	26S proteasome non-ATPase regulatory subunit 10 OS=Mus musculus GN=Psmd10 PE=1 SV=3	DDAGWSPLHIAASAGR-GGLGLILK	2	2	2	>sp|Q9Z2X2|PSD10_MOUSE 26S proteasome non-ATPase regulatory subunit 10 OS=Mus musculus GN=Psmd10 PE=1 SV=3	1	2	2	2	10.4	10.4	10.4	25.083	231	2.9501	10.4	0	6.9	6.9	10.4	0	0	3.5	10.4	0	0	10.4	0	0	6.9	10.4	10.4	0	0	6.9	6.9	0	3.5	6.9				Q9Z2X2	442570285	53380	Psmd10	Q9Z2X2
33	26S proteasome non-ATPase regulatory subunit 11 OS=Mus musculus GN=Psmd11 PE=1 SV=3	26S proteasome non-ATPase regulatory subunit 11 OS=Mus musculus GN=Psmd11 PE=1 SV=3	ALLVEVQLLESK-AQSLLSTDR-DIQENDEEAVQVK-EQSILELGSLLAK-FHGILDQGEGVLIIFDEPPVDK-IMLNTPEDVQALVSGK-LQATLDMQSGIIHAAEEKDWK-LVSLYFDTK-LYDNLLEQNLIR-TAYSYFYEAFEGYDSIDSPK-TGQAAELGGLLK-TYEAALETIQNMSK-VIEPFSR-VQIEHISSLIK-VVDSLYSK-YQEALHLGSQLLR-YVRPFLNSISK	17	17	17	>sp|Q8BG32|PSD11_MOUSE 26S proteasome non-ATPase regulatory subunit 11 OS=Mus musculus GN=Psmd11 PE=1 SV=3	1	17	17	17	52.8	52.8	52.8	47.436	422	119.36	32.9	22.3	15.9	19.7	23	18	18.5	22.3	22.3	12.6	36.7	8.8	10.4	10.7	12.6	20.1	8.1	20.4	18	23.7	20.1	27.5	20.1	10.9			260	Q8BG32	52783229	69077	Psmd11	Q8BG32
34	26S proteasome non-ATPase regulatory subunit 12 OS=Mus musculus GN=Psmd12 PE=1 SV=4	26S proteasome non-ATPase regulatory subunit 12 OS=Mus musculus GN=Psmd12 PE=1 SV=4	DPNNLLNDWSQK-FFQEENTENLK-GSSETPATDVFSSTEEGEKR-ILVAVVK-IYVEIER-LNSLMSLVNK-LQEVIETLLSLEK-MAQLLDLSVDESEAFLSNLVVNK-SVVLYVILAPFDNEQSDLVHR-TASDMVSTSR-WSTLVEDYGVELR-WSTLVEDYGVELRK	12	12	12	>sp|Q9D8W5|PSD12_MOUSE 26S proteasome non-ATPase regulatory subunit 12 OS=Mus musculus GN=Psmd12 PE=1 SV=4	1	12	12	12	32.5	32.5	32.5	52.895	456	66.334	22.8	5	5.5	12.3	15.4	23.2	17.5	14	15.1	21.3	18.6	16.9	6.8	7.5	13.8	18.9	0	14.3	9.9	23.2	14.5	9.6	18	14.5			378	Q9D8W5	341942264	66997	Psmd12	Q9D8W5
35	26S proteasome non-ATPase regulatory subunit 13 OS=Mus musculus GN=Psmd13 PE=1 SV=1	26S proteasome non-ATPase regulatory subunit 13 OS=Mus musculus GN=Psmd13 PE=1 SV=1	ALSVGLVR-DLPVSEQQER-DTDRQWLIDTLYAFNSGAVDR-DVPAFLQQSQSSGPGQAAVWHR-ETIEDVEEMLNNLPGVTSVHSR-FLGCVDIK-FLGCVDIKDLPVSEQQER-LEELYTK-LELWCTDVK-LNIGDLQATK-LYENFISEFEHR-QLTFEEIAK-QMTDPNVALTFLEK-QWLIDTLYAFNSGAVDR-SSDEAVILCK-VLDLQQIK-VNPLSLVEIILHVVR-YYQTIGNHASYYK	18	18	18	>sp|Q9WVJ2|PSD13_MOUSE 26S proteasome non-ATPase regulatory subunit 13 OS=Mus musculus GN=Psmd13 PE=1 SV=1	1	18	18	18	52.7	52.7	52.7	42.809	376	121.63	45.7	30.3	27.4	29	34.6	43.4	26.1	40.2	33.2	47.3	44.1	41.5	24.7	15.4	37.2	37.8	2.7	45.5	28.2	47.1	13	34.3	41.8	21		114;182;357	87	Q9WVJ2	20978560	23997	Psmd13	Q9WVJ2
36	26S proteasome non-ATPase regulatory subunit 14 OS=Mus musculus GN=Psmd14 PE=1 SV=2	26S proteasome non-ATPase regulatory subunit 14 OS=Mus musculus GN=Psmd14 PE=1 SV=2	AVAVVVDPIQSVK-QTTSNLGHLNKPSIQALIHGLNR-VVIDAFR	3	3	3	>sp|O35593|PSDE_MOUSE 26S proteasome non-ATPase regulatory subunit 14 OS=Mus musculus GN=Psmd14 PE=1 SV=2	1	3	3	3	13.9	13.9	13.9	34.577	310	24.463	11.6	4.2	4.2	11.6	13.9	11.6	4.2	11.6	11.6	13.9	11.6	11.6	6.5	4.2	4.2	11.6	6.5	11.6	11.6	11.6	4.2	6.5	11.6	4.2				O35593	51701720	59029	Psmd14	O35593
37	26S proteasome non-ATPase regulatory subunit 2 OS=Mus musculus GN=Psmd2 PE=1 SV=1	26S proteasome non-ATPase regulatory subunit 2 OS=Mus musculus GN=Psmd2 PE=1 SV=1	AELATEEFLPVTPILEGFVILR-AVPLALALISVSNPR-CALGVFR-EPLLTLVK-FGGSGSQVDSAR-LLTDDGNKWLYK-LNILDTLSK-LVGSQEELASWGHEYVR-MNLASSFVNGFVNAAFGQDK-SETELKDTYAR-SFANTLVDVCAYAGSGNVLK-SGALLACGIVNSGVR-TPVQSQQPSATTPSGADEK-VGQAVDVVGQAGKPK-WLPLGLGLNHLGK-YLYSSEDYIK	16	16	16	>sp|Q8VDM4|PSMD2_MOUSE 26S proteasome non-ATPase regulatory subunit 2 OS=Mus musculus GN=Psmd2 PE=1 SV=1	1	16	16	16	24.8	24.8	24.8	100.2	908	94.643	20.6	9.4	9.6	11.9	16	14.9	14.2	17	10.1	12	6.9	6.8	7.5	6.7	11	13.4	14	6.2	12.9	16.4	7.3	13.5	15.3	15.2		251;448;598	370	Q8VDM4	51701831	21762	Psmd2	Q8VDM4
38	26S proteasome non-ATPase regulatory subunit 3 OS=Mus musculus GN=Psmd3 PE=1 SV=3	26S proteasome non-ATPase regulatory subunit 3 OS=Mus musculus GN=Psmd3 PE=1 SV=3	AIQLEYSEAR-ALDLVAAK-EMIDIYSTR-FNQVLDQFGEK-HDADGQATLLNLLLR-ISLADIAQK-LQLDSPEDAEFIVAK-NYLHYSLYDQAEK-SVFPEQANNNEWAR-VYEFLDKLDVVR-YLYYTGR	11	11	10	>sp|P14685|PSMD3_MOUSE 26S proteasome non-ATPase regulatory subunit 3 OS=Mus musculus GN=Psmd3 PE=1 SV=3	1	11	11	10	23.2	23.2	21.5	60.718	530	37.701	14.7	7.5	11.9	10.9	12.1	16	13.2	15.1	14	20.2	12.1	16	15.8	12.1	12.5	10	17.4	10	8.3	13	13.4	12.3	10.4	13.8				P14685	341942181	22123	Psmd3	P14685
39	26S proteasome non-ATPase regulatory subunit 4 OS=Mus musculus GN=Psmd4 PE=1 SV=1	26S proteasome non-ATPase regulatory subunit 4 OS=Mus musculus GN=Psmd4 PE=1 SV=1	AAAASAAEAGIATPGTEDSDDALLK-IIAFVGSPVEDNEKDLVK-ITFCTGIR-LQAQQDAVNIVCHSK-LTAFVNTLNGK-NGDFLPTR-RAAAASAAEAGIATPGTEDSDDALLK-SNPENNVGLITLANDCEVLTTLTPDTGR-VNVDIINFGEEEVNTEK	9	9	9	>sp|O35226|PSMD4_MOUSE 26S proteasome non-ATPase regulatory subunit 4 OS=Mus musculus GN=Psmd4 PE=1 SV=1	1	9	9	9	34.8	34.8	34.8	40.703	376	27.695	18.9	15.2	19.7	14.1	18.9	14.1	19.1	18.9	13.6	26.3	19.1	18.9	2.9	6.6	9.6	9.3	12.2	0	14.4	16.2	18.1	11.4	12.2	9.6		37;58;87		O35226	3914461	19185	Psmd4	O35226
40	26S proteasome non-ATPase regulatory subunit 5 OS=Mus musculus GN=Psmd5 PE=1 SV=4	26S proteasome non-ATPase regulatory subunit 5 OS=Mus musculus GN=Psmd5 PE=1 SV=4	ALQSVVQAVPLHELR-AYLSEGPYYVKPVATTAVEGAD-DSLELFR-ELTGEDVLVR-EQTALCVSILER-GISNQPFPELHCAALK-ISLTQAGLEALFESNLLDDLK-IVENSEAVTEILNNAELLK-LEAPLEELR-LLQAVEPIHLAR-LRPLFSLLNQNNR-QIVYCIGGENLSVAK-TLTLSQIGR-TVAEIFGNSNYLR-VFTAIADQPWAQR-YPVFLEK	16	16	16	>sp|Q8BJY1|PSMD5_MOUSE 26S proteasome non-ATPase regulatory subunit 5 OS=Mus musculus GN=Psmd5 PE=1 SV=4	1	16	16	16	42.3	42.3	42.3	55.971	504	100.04	23.8	15.7	19.6	18.1	27.8	32.9	25	23.4	29.6	23	30.8	27.8	11.7	13.7	13.3	26.2	4.6	13.1	19.4	36.1	18.1	22.6	26.2	25.6		64;133;412		Q8BJY1	52783230	66998	Psmd5	Q8BJY1
41	26S proteasome non-ATPase regulatory subunit 6 OS=Mus musculus GN=Psmd6 PE=1 SV=1	26S proteasome non-ATPase regulatory subunit 6 OS=Mus musculus GN=Psmd6 PE=1 SV=1	AEYLCQIGDKEGALTAFR-DWLFAPHYR-GAEILEVLHSLPAVR-IHAYSQLLESYR-NLGESEIR-NWQYQETIK-PLENLEEEGLPK-PLENLEEEGLPKNPDLR-QAAELFLDTVSTFTSYELMDYK-QYLFSLYECR-SLIEEGGDWDRR	11	11	11	>sp|Q99JI4|PSMD6_MOUSE 26S proteasome non-ATPase regulatory subunit 6 OS=Mus musculus GN=Psmd6 PE=1 SV=1	1	11	11	11	33.9	33.9	33.9	45.536	389	66.844	15.4	18.3	15.7	18.5	23.9	23.9	13.6	18.5	15.9	20.8	22.9	21.3	19	10.8	10.5	24.2	0	15.9	21.3	26.2	3.9	18.3	31.6	10.5		112;266		Q99JI4	20978552	66413	Psmd6	Q99JI4
42	26S proteasome non-ATPase regulatory subunit 7 OS=Mus musculus GN=Psmd7 PE=1 SV=2	26S proteasome non-ATPase regulatory subunit 7 OS=Mus musculus GN=Psmd7 PE=1 SV=2	DIKDTTVGTLSQR-DLGLPTEAYISVEEVHDDGTPTSK-PELAVQK-SVVALHNLINNK-TFEHVTSEIGAEEAEEVGVEHLLR-TNDQMVVVYLASLIR-VVGVLLGSWQK-VVVHPLVLLSVVDHFNR-YCPNSVLVIIDVKPK	9	9	9	>sp|P26516|PSMD7_MOUSE 26S proteasome non-ATPase regulatory subunit 7 OS=Mus musculus GN=Psmd7 PE=1 SV=2	1	9	9	9	43	43	43	36.539	321	131.46	37.7	14.3	18.7	12.1	33	33.6	28	38.3	8.1	28	35.5	37.7	23.4	19.3	18.1	37.1	0	24.6	19	37.1	19.9	25.5	37.7	23.4		116	257	P26516	266539	17463	Psmd7	P26516
43	26S proteasome non-ATPase regulatory subunit 8 OS=Mus musculus GN=Psmd8 PE=1 SV=2	26S proteasome non-ATPase regulatory subunit 8 OS=Mus musculus GN=Psmd8 PE=1 SV=2	CYYFDYK-DIQTNVYIK-GWVLGPNNYYSFASQQQKPEDSTIPSTELAK-ILFAEATR-ILFFSTPK-LKLVLLELNFLPTTGTK-LVLLELNFLPTTGTK-QQLILAR-QVIEYAR-VAEFHTELER	10	10	10	>sp|Q9CX56|PSMD8_MOUSE 26S proteasome non-ATPase regulatory subunit 8 OS=Mus musculus GN=Psmd8 PE=1 SV=2	1	10	10	10	29.5	29.5	29.5	39.93	353	39.83	19.8	9.1	25.5	25.5	13	29.5	0	20.1	22.4	15.3	18.4	18.1	13.9	13.9	13.3	23.5	24.6	24.6	13.9	25.5	23.2	22.1	24.6	26.1		176		Q9CX56	308153478	57296	Psmd8	Q9CX56
44	26S proteasome non-ATPase regulatory subunit 9 OS=Mus musculus GN=Psmd9 PE=1 SV=1	26S proteasome non-ATPase regulatory subunit 9 OS=Mus musculus GN=Psmd9 PE=1 SV=1	ADVDLYQVR-ANYDVLESQK-GLLGCNIIPLQR-LASNSPVLPQAFAR	4	4	4	>sp|Q9CR00|PSMD9_MOUSE 26S proteasome non-ATPase regulatory subunit 9 OS=Mus musculus GN=Psmd9 PE=1 SV=1	1	4	4	4	20.3	20.3	20.3	24.72	222	14.006	20.3	10.8	9.9	16.2	16.2	6.3	6.3	0	6.3	4.5	20.3	6.3	20.3	5.4	6.3	0	20.3	14.9	20.3	10.4	14.9	14.9	4.5	9.9		215		Q9CR00	20978553	67151	Psmd9	Q9CR00
45	28 kDa heat- and acid-stable phosphoprotein OS=Mus musculus GN=Pdap1 PE=1 SV=1	28 kDa heat- and acid-stable phosphoprotein OS=Mus musculus GN=Pdap1 PE=1 SV=1	GVEGLIDIENPNR-VTQLDLDGPK	2	2	2	>sp|Q3UHX2|HAP28_MOUSE 28 kDa heat- and acid-stable phosphoprotein OS=Mus musculus GN=Pdap1 PE=1 SV=1	1	2	2	2	12.7	12.7	12.7	20.605	181	5.0178	12.7	12.7	12.7	12.7	12.7	12.7	0	12.7	5.5	7.2	0	12.7	0	0	7.2	12.7	12.7	0	12.7	12.7	12.7	12.7	12.7	12.7				Q3UHX2	84029300	231887	Pdap1	Q3UHX2
46	28S ribosomal protein S23, mitochondrial OS=Mus musculus GN=Mrps23 PE=1 SV=1	28S ribosomal protein S23, mitochondrial OS=Mus musculus GN=Mrps23 PE=1 SV=1	AFDLFNPNFK-ALLAEGIILR-LETVGSVFSR-YTELQNLGETDEEKLFVETGK	4	4	4	>sp|Q8VE22|RT23_MOUSE 28S ribosomal protein S23, mitochondrial OS=Mus musculus GN=Mrps23 PE=1 SV=1	1	4	4	4	28.8	28.8	28.8	20.348	177	4.9557	5.6	5.6	0	5.6	5.6	16.9	5.6	5.6	5.6	11.3	0	0	11.3	5.6	0	5.6	0	0	11.3	28.8	23.2	11.3	5.6	5.6				Q8VE22	31076981	64656	Mrps23	Q8VE22
47	28S ribosomal protein S29, mitochondrial OS=Mus musculus GN=Dap3 PE=2 SV=1	28S ribosomal protein S29, mitochondrial OS=Mus musculus GN=Dap3 PE=2 SV=1	EGFNALEPFLPILIPNYNPK-FDQPLEASTWLK	2	2	2	>sp|Q9ER88|RT29_MOUSE 28S ribosomal protein S29, mitochondrial OS=Mus musculus GN=Dap3 PE=2 SV=1	1	2	2	2	8.2	8.2	8.2	44.699	391	6.0026	8.2	5.1	3.1	3.1	8.2	8.2	0	8.2	5.1	8.2	5.1	8.2	3.1	0	5.1	5.1	0	8.2	3.1	8.2	0	3.1	8.2	0				Q9ER88	24212384	65111	Dap3	Q9ER88
48	28S ribosomal protein S31, mitochondrial OS=Mus musculus GN=Mrps31 PE=2 SV=1	28S ribosomal protein S31, mitochondrial OS=Mus musculus GN=Mrps31 PE=2 SV=1	AFADEPPEPEASPSLWEIEFAK-NEFLSPELVAAASAVADSLPFDK	2	2	2	>sp|Q61733|RT31_MOUSE 28S ribosomal protein S31, mitochondrial OS=Mus musculus GN=Mrps31 PE=2 SV=1	1	2	2	2	11.7	11.7	11.7	43.88	384	4.3226	11.7	0	0	0	5.7	5.7	0	0	0	5.7	11.7	0	0	0	0	11.7	0	0	0	11.7	0	0	11.7	0				Q61733	24212370	57312	Mrps31	Q61733
49	28S ribosomal protein S35, mitochondrial OS=Mus musculus GN=Mrps35 PE=2 SV=2	28S ribosomal protein S35, mitochondrial OS=Mus musculus GN=Mrps35 PE=2 SV=2	ATDVLTITTDR-IPNFLHLTPVAIK	2	2	2	>sp|Q8BJZ4|RT35_MOUSE 28S ribosomal protein S35, mitochondrial OS=Mus musculus GN=Mrps35 PE=2 SV=2	1	2	2	2	7.5	7.5	7.5	35.975	320	2.7653	0	0	0	0	0	0	0	0	0	0	0	0	0	0	4.1	0	0	0	0	7.5	0	0	0	0				Q8BJZ4	88941979	232536	Mrps35	Q8BJZ4
50	2-amino-3-ketobutyrate coenzyme A ligase, mitochondrial OS=Mus musculus GN=Gcat PE=1 SV=2	2-amino-3-ketobutyrate coenzyme A ligase, mitochondrial OS=Mus musculus GN=Gcat PE=1 SV=2	ALGGASGGYTTGPEPLVSLLR-GIFVIGFSYPVVPK-GTDELLGVMDQVTIINSTLGK-VQISAVHSEEDIDR	4	4	4	>sp|O88986|KBL_MOUSE 2-amino-3-ketobutyrate coenzyme A ligase, mitochondrial OS=Mus musculus GN=Gcat PE=1 SV=2	1	4	4	4	16.8	16.8	16.8	44.93	416	8.4566	0	8.4	5	0	0	8.4	8.4	8.4	3.4	11.8	0	0	0	8.4	8.4	0	0	0	0	0	0	3.4	13.5	5				O88986	6685546	26912	Gcat	O88986
51	2-aminoethanethiol dioxygenase OS=Mus musculus GN=Ado PE=1 SV=2	2-aminoethanethiol dioxygenase OS=Mus musculus GN=Ado PE=1 SV=2	AEDLNIAPR-RPPPEQQFEPPLQPLER	2	2	2	>sp|Q6PDY2|AEDO_MOUSE 2-aminoethanethiol dioxygenase OS=Mus musculus GN=Ado PE=1 SV=2	1	2	2	2	10.2	10.2	10.2	28.372	256	4.2103	10.2	6.6	0	0	10.2	6.6	0	6.6	10.2	0	3.5	6.6	0	0	0	0	0	0	6.6	6.6	10.2	0	6.6	0				Q6PDY2	88984114	211488	Ado	Q6PDY2
52	2-oxoglutarate dehydrogenase, mitochondrial OS=Mus musculus GN=Ogdh PE=1 SV=3	2-oxoglutarate dehydrogenase, mitochondrial OS=Mus musculus GN=Ogdh PE=1 SV=3	DVVVDLVCYR-FEEFLQR-FGLEGCEVLIPALK-FLDTAFDLDAFKK-GHHVAQLDPLGILDADLDSSVPADIISSTDK-HWLDSPWPGFFTLDGQPR-IEQLSPFPFDLLLK-LNVLANVIR-NITLSLVANPSHLEAADPVVMGK-NTNAGAPPGTAYQSPLSLSR-QILLPFR-SMTCPSTGLEEDVLFHIGK-SSPYPTDVAR-SWDIFFR-VASSVPVENFTIHGGLSR-VFHLPTTTFIGGQEPALPLR-VYYDLTR-YAELLVSQGVVNQPEYEEEISK-YAELLVSQGVVNQPEYEEEISKYDK	19	19	19	>sp|Q60597|ODO1_MOUSE 2-oxoglutarate dehydrogenase, mitochondrial OS=Mus musculus GN=Ogdh PE=1 SV=3	1	19	19	19	26.6	26.6	26.6	116.45	1023	98.974	20.9	14	14	14.8	18.2	10.3	15.7	18	14	13.3	12	9.9	15	7	11.6	18.4	15.6	7.6	14.5	18.4	14.6	15.5	22.3	11		283;507;604	385;602	Q60597	146345472	18293	Ogdh	Q60597
54	3'(2'),5'-bisphosphate nucleotidase 1 OS=Mus musculus GN=Bpnt1 PE=1 SV=2	3'(2'),5'-bisphosphate nucleotidase 1 OS=Mus musculus GN=Bpnt1 PE=1 SV=2	AIAGIINQPYYNYQAGPDAALGR-IIQLIEGK-LTDIHGNALQYNK-LVASAYSIAQK-NYEYYASHVPESVK	5	5	5	>sp|Q9Z0S1|BPNT1_MOUSE 3(2),5-bisphosphate nucleotidase 1 OS=Mus musculus GN=Bpnt1 PE=1 SV=2	1	5	5	5	22.4	22.4	22.4	33.196	308	12.697	18.2	22.4	17.9	22.4	15.6	22.4	22.4	22.4	12.3	18.2	10.1	19.8	17.9	16.2	18.2	18.8	0	14.3	18.8	19.8	10.1	15.3	22.4	6.2				Q9Z0S1	46396056	23827	Bpnt1	Q9Z0S1
57	39S ribosomal protein L12, mitochondrial OS=Mus musculus GN=Mrpl12 PE=1 SV=2	39S ribosomal protein L12, mitochondrial OS=Mus musculus GN=Mrpl12 PE=1 SV=2	KLVESLPQEIK-LVESLPQEIK-NYVQGINLVQAK-SEALAGAPLDNAPK	4	4	4	>sp|Q9DB15|RM12_MOUSE 39S ribosomal protein L12, mitochondrial OS=Mus musculus GN=Mrpl12 PE=1 SV=2	1	4	4	4	18.4	18.4	18.4	21.708	201	6.8435	17.9	17.9	11.4	11.4	10.9	10.9	18.4	17.9	10.9	17.9	17.9	11.4	17.9	5.5	12.9	5.5	10.9	10.9	17.9	11.4	11.4	17.9	12.9	17.9				Q9DB15	17865556	56282	Mrpl12	Q9DB15
58	39S ribosomal protein L23, mitochondrial OS=Mus musculus GN=Mrpl23 PE=2 SV=1	39S ribosomal protein L23, mitochondrial OS=Mus musculus GN=Mrpl23 PE=2 SV=1	NVLYPLYQLGGPQLR-NYLEQIYNVPVAAVR-SPEPLEEELPQQR-TNFFIQLVRPGTAQPEDTVQFR	4	4	4	>sp|O35972|RM23_MOUSE 39S ribosomal protein L23, mitochondrial OS=Mus musculus GN=Mrpl23 PE=2 SV=1	1	4	4	4	44.5	44.5	44.5	17.121	146	5.053	10.3	19.2	0	25.3	0	10.3	10.3	0	10.3	0	0	10.3	0	10.3	0	19.2	0	0	10.3	44.5	29.5	0	15.1	0				O35972	68566012	19935	Mrpl23	O35972
61	39S ribosomal protein L46, mitochondrial OS=Mus musculus GN=Mrpl46 PE=1 SV=1	39S ribosomal protein L46, mitochondrial OS=Mus musculus GN=Mrpl46 PE=1 SV=1	AIQTESDLGVK-ALLLTGDFVQAGKK-NLVLLVR	3	3	3	>sp|Q9EQI8|RM46_MOUSE 39S ribosomal protein L46, mitochondrial OS=Mus musculus GN=Mrpl46 PE=1 SV=1	1	3	3	3	11.3	11.3	11.3	32.131	283	4.3006	6.4	6.4	6.4	2.5	6.4	6.4	0	6.4	11.3	2.5	0	6.4	4.9	0	2.5	7.4	6.4	0	11.3	11.3	11.3	11.3	0	7.4				Q9EQI8	52783324	67308	Mrpl46	Q9EQI8
62	39S ribosomal protein L49, mitochondrial OS=Mus musculus GN=Mrpl49 PE=2 SV=1	39S ribosomal protein L49, mitochondrial OS=Mus musculus GN=Mrpl49 PE=2 SV=1	DPLPSLPYFVR-TPITQVNEVTGTLR	2	2	2	>sp|Q9CQ40|RM49_MOUSE 39S ribosomal protein L49, mitochondrial OS=Mus musculus GN=Mrpl49 PE=2 SV=1	1	2	2	2	15.1	15.1	15.1	19.133	166	2.4346	0	6.6	0	8.4	0	15.1	15.1	6.6	6.6	0	0	0	0	0	6.6	0	8.4	0	6.6	6.6	15.1	0	0	0				Q9CQ40	20139719	18120	Mrpl49	Q9CQ40
64	3-hydroxyacyl-CoA dehydrogenase type-2 OS=Mus musculus GN=Hsd17b10 PE=1 SV=4	3-hydroxyacyl-CoA dehydrogenase type-2 OS=Mus musculus GN=Hsd17b10 PE=1 SV=4	DLAPTGIR-EIQAALTLAK-GVIINTASVAAFEGQVGQAAYSASK-NFLASQVPFPSR-VINVNLIGTFNVIR-VVTIAPGLFATPLLTTLPEK	6	6	6	>sp|O08756|HCD2_MOUSE 3-hydroxyacyl-CoA dehydrogenase type-2 OS=Mus musculus GN=Hsd17b10 PE=1 SV=4	1	6	6	6	34.1	34.1	34.1	27.418	261	235.52	34.1	19.2	19.2	34.1	28.7	34.1	0	28.7	30.3	28.7	15.3	28.7	19.2	28.7	19.2	20.7	28.7	28.7	19.2	30.3	31	28.7	34.1	34.1				O08756	3183025	---	Hsd17b10	O08756
65	3-hydroxyanthranilate 3,4-dioxygenase OS=Mus musculus GN=Haao PE=1 SV=1	3-hydroxyanthranilate 3,4-dioxygenase OS=Mus musculus GN=Haao PE=1 SV=1	DLGTQLAPIIQEFFHSEQYR-QGEIFLLPAR-YYVGDTEDVLFEK	3	3	3	>sp|Q78JT3|3HAO_MOUSE 3-hydroxyanthranilate 3,4-dioxygenase OS=Mus musculus GN=Haao PE=1 SV=1	1	3	3	3	15	15	15	32.804	286	7.5335	3.5	3.5	3.5	3.5	3.5	4.5	8	3.5	8	0	8	8	3.5	3.5	3.5	0	0	3.5	3.5	15	3.5	3.5	3.5	3.5				Q78JT3	61211578	107766	Haao	Q78JT3
66	3-hydroxyisobutyrate dehydrogenase, mitochondrial OS=Mus musculus GN=Hibadh PE=1 SV=1	3-hydroxyisobutyrate dehydrogenase, mitochondrial OS=Mus musculus GN=Hibadh PE=1 SV=1	DFSSVFQYLR-DLGLAQDSATSTK-EAGEQVASSPAEVAEK-GSLLIDSSTIDPSVSK-KGSLLIDSSTIDPSVSK-TPILLGSLAHQIYR	6	6	6	>sp|Q99L13|3HIDH_MOUSE 3-hydroxyisobutyrate dehydrogenase, mitochondrial OS=Mus musculus GN=Hibadh PE=1 SV=1	1	6	6	6	20.9	20.9	20.9	35.44	335	14.469	13.1	8.7	12.2	4.2	3.9	17.9	4.8	9.3	13.7	3.9	15.8	17	8.1	9.3	4.2	4.8	9	9	5.1	14	14	12.2	9.9	9.3				Q99L13	32363159	58875	Hibadh	Q99L13
67	3-hydroxyisobutyryl-CoA hydrolase, mitochondrial OS=Mus musculus GN=Hibch PE=1 SV=1	3-hydroxyisobutyryl-CoA hydrolase, mitochondrial OS=Mus musculus GN=Hibch PE=1 SV=1	LGYFLALTGYR-QNLTQDLFR-SPSAEDVAGVLESYHAK-TWEQDPDTFLIIIK-VLEEELLALK-VLEEELLALKSPSAEDVAGVLESYHAK	6	6	6	>sp|Q8QZS1|HIBCH_MOUSE 3-hydroxyisobutyryl-CoA hydrolase, mitochondrial OS=Mus musculus GN=Hibch PE=1 SV=1	1	6	6	6	15.8	15.8	15.8	43.037	385	11.45	15.8	8.8	11.4	13.2	13.5	10.6	11.4	15.8	11.4	2.3	11.4	11.4	4.4	0	9.1	13.5	0	6.5	7.3	15.8	3.6	2.6	15.8	4.9				Q8QZS1	81878695	227095	Hibch	Q8QZS1
68	3-ketoacyl-CoA thiolase A, peroxisomal OS=Mus musculus GN=Acaa1a PE=1 SV=1; 3-ketoacyl-CoA thiolase B, peroxisomal OS=Mus musculus GN=Acaa1b PE=1 SV=1	3-ketoacyl-CoA thiolase A, peroxisomal OS=Mus musculus GN=Acaa1a PE=1 SV=1; 3-ketoacyl-CoA thiolase B, peroxisomal OS=Mus musculus GN=Acaa1b PE=1 SV=1	AEIVPVTTTVLDDK-FPQASASDVVVVHGR-NTTPDELLSAVLTAVLQDVR-QKQDDFALASQQK-AEELGLPILGVLR-DGGSTTAGNSSQVSDGAAAVLLAR-IAQFLSGIPETVPLSTVNR-QVVTLLNELK-QVVTLLNELKR-SKAEELGLPILGVLR	10;6	10;6	10;6	>sp|Q921H8|THIKA_MOUSE 3-ketoacyl-CoA thiolase A, peroxisomal OS=Mus musculus GN=Acaa1a PE=1 SV=1;>sp|Q8VCH0|THIKB_MOUSE 3-ketoacyl-CoA thiolase B, peroxisomal OS=Mus musculus GN=Acaa1b PE=1 SV=1	2	10	10	10	30.9	30.9	30.9	43.953	424	87.15	27.6	22.9	22.9	23.1	22.9	19.6	22.9	22.9	16.3	19.6	25.9	22.9	20.5	13.9	19.3	19.6	0	22.6	26.2	30.9	19.6	22.9	25.9	18.6				Q921H8	73919873	113868	Acaa1a	Q921H8
69	3-ketoacyl-CoA thiolase, mitochondrial OS=Mus musculus GN=Acaa2 PE=1 SV=3	3-ketoacyl-CoA thiolase, mitochondrial OS=Mus musculus GN=Acaa2 PE=1 SV=3	AGLSLKDMDLIDVNEAFAPQFLSVQK-ALDLDPSK-ALDLDPSKTNVSGGAIALGHPLGGSGSR-DFSATDLTEFAAR-DGTVTAGNASGVSDGAGAVIIASEDAVK-DGTVTAGNASGVSDGAGAVIIASEDAVKK-DMDLIDVNEAFAPQFLSVQK-EDCDRYALQSQQR-GVFIVAAK-LEDTLWAGLTDQHVK-RTPFGAYGGLLK-TNVSGGAIALGHPLGGSGSR-TPFGAYGGLLK-VGVPTETGALTLNR-VPPETIDSVIVGNVMQSSSDAAYLAR-YALQSQQR	16	16	16	>sp|Q8BWT1|THIM_MOUSE 3-ketoacyl-CoA thiolase, mitochondrial OS=Mus musculus GN=Acaa2 PE=1 SV=3	1	16	16	16	46.3	46.3	46.3	41.829	397	97.234	27.5	32.7	27.7	31	39.5	35.8	27.7	41.3	32.7	44.8	41.3	39.8	18.9	15.9	23.9	39.3	0	29.5	19.4	40.8	20.4	44.6	35.8	11.6		179		Q8BWT1	342187137	52538	Acaa2	Q8BWT1
70	3-mercaptopyruvate sulfurtransferase OS=Mus musculus GN=Mpst PE=1 SV=3	3-mercaptopyruvate sulfurtransferase OS=Mus musculus GN=Mpst PE=1 SV=3	ALVSAQWVAEALK-DGIEPGHIPGSVNIPFTEFLTNEGLEK-FQGTQPEPR-FQVVDAR-HIPGAAFFDIDR-HWLNQNLPISSGK-LLDASWYLPK-SHSEPAEFSAQLDPSFIK-THEDILENLDAR	9	9	9	>sp|Q99J99|THTM_MOUSE 3-mercaptopyruvate sulfurtransferase OS=Mus musculus GN=Mpst PE=1 SV=3	1	9	9	9	40.7	40.7	40.7	33.023	297	98.351	34.3	12.5	11.8	11.8	6.1	16.5	3.4	31	22.2	26.6	34	18.5	13.5	17.5	10.4	34	31.6	4.4	7.7	34	10.4	17.8	29	9.1				Q99J99	90110410	---	Mpst	Q99J99
71	3-oxoacyl-[acyl-carrier-protein] synthase, mitochondrial OS=Mus musculus GN=Oxsm PE=1 SV=1	3-oxoacyl-[acyl-carrier-protein] synthase, mitochondrial OS=Mus musculus GN=Oxsm PE=1 SV=1	GESGIVSVVGDEYK-IYAEILGYGLSGDAGHITAPDPEGEGALR	2	2	2	>sp|Q9D404|OXSM_MOUSE 3-oxoacyl-[acyl-carrier-protein] synthase, mitochondrial OS=Mus musculus GN=Oxsm PE=1 SV=1	1	2	2	2	9.4	9.4	9.4	48.627	459	4.8657	3.1	0	0	6.3	0	0	6.3	0	6.3	0	3.1	6.3	0	0	6.3	0	0	0	0	6.3	0	0	0	0				Q9D404	81905062	71147	Oxsm	Q9D404
72	40S ribosomal protein S10 OS=Mus musculus GN=Rps10 PE=1 SV=1	40S ribosomal protein S10 OS=Mus musculus GN=Rps10 PE=1 SV=1	AEAGAGSATEFQFR-DYLHLPPEIVPATLR-HFYWYLTNEGIQYLR-IAIYELLFK-KAEAGAGSATEFQFR	5	5	5	>sp|P63325|RS10_MOUSE 40S ribosomal protein S10 OS=Mus musculus GN=Rps10 PE=1 SV=1	1	5	5	5	32.7	32.7	32.7	18.916	165	36.022	23.6	13.9	14.5	32.7	0	23.6	23.6	23.6	23.6	32.7	14.5	14.5	5.5	23.6	23.6	32.7	14.5	18.2	23.6	32.7	23	14.5	23.6	23.6				P63325	54039315	67097	Rps10	P63325
73	40S ribosomal protein S11 OS=Mus musculus GN=Rps11 PE=1 SV=3	40S ribosomal protein S11 OS=Mus musculus GN=Rps11 PE=1 SV=3	CPFTGNVSIR-DVQIGDIVTVGECRPLSK-ILSGVVTK-NIGLGFK-QPTIFQNK	5	5	5	>sp|P62281|RS11_MOUSE 40S ribosomal protein S11 OS=Mus musculus GN=Rps11 PE=1 SV=3	1	5	5	5	32.3	32.3	32.3	18.431	158	8.1299	16.5	5.1	9.5	16.5	5.1	5.1	0	5.1	10.1	9.5	10.1	21.5	25.9	5.1	5.1	11.4	5.1	20.9	5.1	21.5	4.4	14.6	9.5	10.1		60;131		P62281	54039310	27207	Rps11	P62281
74	40S ribosomal protein S12 OS=Mus musculus GN=Rps12 PE=1 SV=2	40S ribosomal protein S12 OS=Mus musculus GN=Rps12 PE=1 SV=2	DVIEEYFK-ESQAKDVIEEYFK-KVVGCSCVVVK-LGEWVGLCK-QAHLCVLASNCDEPMYVK-TALIHDGLAR	6	6	6	>sp|P63323|RS12_MOUSE 40S ribosomal protein S12 OS=Mus musculus GN=Rps12 PE=1 SV=2	1	6	6	6	46.2	46.2	46.2	14.525	132	112.66	46.2	25	17.4	37.9	16.7	42.4	32.6	31.1	16.7	16.7	34.8	24.2	28.8	6.8	42.4	46.2	30.3	30.3	23.5	37.9	37.9	30.3	46.2	38.6		50;56;92;106;108	60	P63323	54039314	---	Rps12	P63323
75	40S ribosomal protein S13 OS=Mus musculus GN=Rps13 PE=1 SV=2	40S ribosomal protein S13 OS=Mus musculus GN=Rps13 PE=1 SV=2	GLAPDLPEDLYHLIK-GLTPSQIGVILR-KGLTPSQIGVILR-LILIESR	4	4	4	>sp|P62301|RS13_MOUSE 40S ribosomal protein S13 OS=Mus musculus GN=Rps13 PE=1 SV=2	1	4	4	4	23.2	23.2	23.2	17.222	151	4.7628	12.6	12.6	0	12.6	0	13.2	0	12.6	13.2	0	0	12.6	0	0	4.6	13.2	0	23.2	7.9	22.5	12.6	0	0	12.6				P62301	54039312	102642137	Rps13	P62301
76	40S ribosomal protein S14 OS=Mus musculus GN=Rps14 PE=2 SV=3	40S ribosomal protein S14 OS=Mus musculus GN=Rps14 PE=2 SV=3	IEDVTPIPSDSTR-IEDVTPIPSDSTRR-TKTPGPGAQSALR-TPGPGAQSALR	4	4	4	>sp|P62264|RS14_MOUSE 40S ribosomal protein S14 OS=Mus musculus GN=Rps14 PE=2 SV=3	1	4	4	4	17.9	17.9	17.9	16.273	151	33.21	17.9	17.9	9.3	16.6	7.3	17.9	16.6	17.9	17.9	15.9	0	17.9	15.9	17.2	17.9	15.9	15.9	8.6	16.6	17.9	15.9	7.3	9.3	17.2				P62264	50403753	20044	Rps14	P62264
77	40S ribosomal protein S15a OS=Mus musculus GN=Rps15a PE=1 SV=2	40S ribosomal protein S15a OS=Mus musculus GN=Rps15a PE=1 SV=2	HGYIGEFEIIDDHR-IVVNLTGR-MNVLADALK-WQNNLLPSR	4	4	4	>sp|P62245|RS15A_MOUSE 40S ribosomal protein S15a OS=Mus musculus GN=Rps15a PE=1 SV=2	1	4	4	4	30.8	30.8	30.8	14.839	130	14.498	20	23.8	23.8	30.8	24.6	30.8	6.9	23.8	23.8	30.8	24.6	30.8	13.1	24.6	30.8	13.1	23.8	23.8	23.8	30.8	6.9	16.9	30.8	30.8			4	P62245	54039458	267019	Rps15a	P62245
78	40S ribosomal protein S16 OS=Mus musculus GN=Rps16 PE=2 SV=4	40S ribosomal protein S16 OS=Mus musculus GN=Rps16 PE=2 SV=4	ALVAYYQK-EIKDILIQYDR-GGGHVAQIYAIR-GPLQSVQVFGR-LLEPVLLLGK-TLLVADPR	6	6	6	>sp|P14131|RS16_MOUSE 40S ribosomal protein S16 OS=Mus musculus GN=Rps16 PE=2 SV=4	1	6	6	6	41.1	41.1	41.1	16.445	146	15.601	14.4	14.4	14.4	27.4	7.5	12.3	19.9	27.4	28.1	28.8	21.9	12.3	19.9	6.8	17.8	19.9	19.9	21.9	6.8	19.9	13	15.1	25.3	19.9				P14131	54039372	20055	Rps16	P14131
79	40S ribosomal protein S17 OS=Mus musculus GN=Rps17 PE=1 SV=2	40S ribosomal protein S17 OS=Mus musculus GN=Rps17 PE=1 SV=2	DNYVPEVSALDQEIIEVDPDTK-LLDFGSLSNLQVTQPTVGMNFK-RDNYVPEVSALDQEIIEVDPDTK-VCEEIAIIPSK-VCEEIAIIPSKK	5	5	5	>sp|P63276|RS17_MOUSE 40S ribosomal protein S17 OS=Mus musculus GN=Rps17 PE=1 SV=2	1	5	5	5	42.2	42.2	42.2	15.524	135	103.74	16.3	16.3	0	0	8.9	25.9	16.3	16.3	24.4	24.4	0	16.3	0	40.7	24.4	33.3	8.9	25.2	8.1	41.5	17	16.3	16.3	0		35	126	P63276	54039390	20068	Rps17	P63276
80	40S ribosomal protein S18 OS=Mus musculus GN=Rps18 PE=1 SV=3	40S ribosomal protein S18 OS=Mus musculus GN=Rps18 PE=1 SV=3	AGELTEDEVER-IPDWFLNR-VITIMQNPR-VLNTNIDGR-YSQVLANGLDNK	5	5	5	>sp|P62270|RS18_MOUSE 40S ribosomal protein S18 OS=Mus musculus GN=Rps18 PE=1 SV=3	1	5	5	5	32.2	32.2	32.2	17.718	152	6.5831	12.5	5.9	7.9	7.9	11.8	26.3	5.3	20.4	5.9	11.8	5.9	19.1	0	5.3	5.3	5.9	5.9	11.2	25	19.1	5.3	21.1	13.8	19.1				P62270	54039385	20084	Rps18	P62270
81	40S ribosomal protein S19 OS=Mus musculus GN=Rps19 PE=1 SV=3	40S ribosomal protein S19 OS=Mus musculus GN=Rps19 PE=1 SV=3	ALAAFLK-DVNQQEFVR-ELAPYDENWFYTR-VLQALEGLK-VPEWVDTVK	5	5	5	>sp|Q9CZX8|RS19_MOUSE 40S ribosomal protein S19 OS=Mus musculus GN=Rps19 PE=1 SV=3	1	5	5	5	32.4	32.4	32.4	16.085	145	9.1547	26.2	21.4	21.4	21.4	6.2	17.2	18.6	26.2	23.4	12.4	0	17.2	12.4	21.4	12.4	32.4	21.4	23.4	26.2	21.4	18.6	12.4	12.4	32.4				Q9CZX8	47117306	20085	Rps19	Q9CZX8
82	40S ribosomal protein S2 OS=Mus musculus GN=Rps2 PE=2 SV=3	40S ribosomal protein S2 OS=Mus musculus GN=Rps2 PE=2 SV=3	GTGIVSAPVPK-LSIVPVR-SLEEIYLFSLPIK-TQAPAVATT-TYSYLTPDLWK	5	5	5	>sp|P25444|RS2_MOUSE 40S ribosomal protein S2 OS=Mus musculus GN=Rps2 PE=2 SV=3	1	5	5	5	17.4	17.4	17.4	31.231	293	15.788	14.3	6.1	14.3	11.9	7.5	9.2	0	14.3	10.6	14.3	13.7	14.3	6.1	10.6	14.3	17.4	17.4	11.9	6.1	17.4	6.8	8.2	14.3	10.6				P25444	46397787	16898	Rps2	P25444
83	40S ribosomal protein S20 OS=Mus musculus GN=Rps20 PE=1 SV=1	40S ribosomal protein S20 OS=Mus musculus GN=Rps20 PE=1 SV=1	LIDLHSPSEIVK-TPVEPEVAIHR-VCADLIR	3	3	3	>sp|P60867|RS20_MOUSE 40S ribosomal protein S20 OS=Mus musculus GN=Rps20 PE=1 SV=1	1	3	3	3	25.2	25.2	25.2	13.373	119	15.547	9.2	25.2	25.2	19.3	19.3	25.2	25.2	16	19.3	10.1	19.3	16	10.1	10.1	19.3	19.3	25.2	10.1	10.1	19.3	25.2	10.1	19.3	25.2		36		P60867	46397704	67427	Rps20	P60867
84	40S ribosomal protein S21 OS=Mus musculus GN=Rps21 PE=2 SV=1	40S ribosomal protein S21 OS=Mus musculus GN=Rps21 PE=2 SV=1	DHASIQMNVAEVDR-MGESDDSILR-RMGESDDSILR-TYGICGAIR	4	4	4	>sp|Q9CQR2|RS21_MOUSE 40S ribosomal protein S21 OS=Mus musculus GN=Rps21 PE=2 SV=1	1	4	4	4	41	41	41	9.1413	83	19.001	39.8	24.1	41	24.1	10.8	22.9	41	41	41	22.9	28.9	24.1	39.8	24.1	24.1	10.8	41	27.7	22.9	41	24.1	22.9	41	39.8		56	34;62	Q9CQR2	22001961	66481	Rps21	Q9CQR2
85	40S ribosomal protein S25 OS=Mus musculus GN=Rps25 PE=1 SV=1	40S ribosomal protein S25 OS=Mus musculus GN=Rps25 PE=1 SV=1	AALQELLSK-AQVIYTR-DKLNNLVLFDK-GGDAPAAGEDA-LITPAVVSER-LNNLVLFDK	6	6	6	>sp|P62852|RS25_MOUSE 40S ribosomal protein S25 OS=Mus musculus GN=Rps25 PE=1 SV=1	1	6	6	6	38.4	38.4	38.4	13.742	125	10.884	36.8	28	22.4	22.4	14.4	28	8	22.4	28	15.2	7.2	28	8	8	15.2	29.6	15.2	7.2	22.4	38.4	15.2	22.4	22.4	36.8				P62852	51338649	75617	Rps25	P62852
86	40S ribosomal protein S26 OS=Mus musculus GN=Rps26 PE=2 SV=3	40S ribosomal protein S26 OS=Mus musculus GN=Rps26 PE=2 SV=3	DISEASVFDAYVLPK-NIVEAAAVR	2	2	2	>sp|P62855|RS26_MOUSE 40S ribosomal protein S26 OS=Mus musculus GN=Rps26 PE=2 SV=3	1	2	2	2	20.9	20.9	20.9	13.015	115	8.6791	13	7.8	0	13	7.8	7.8	0	0	20.9	13	0	20.9	13	0	0	20.9	20.9	0	20.9	20.9	0	20.9	13	0				P62855	51338651	27370	Rps26	P62855
87	40S ribosomal protein S27-like OS=Mus musculus GN=Rps27l PE=2 SV=3; 40S ribosomal protein S27 OS=Mus musculus GN=Rps27 PE=1 SV=3	40S ribosomal protein S27-like OS=Mus musculus GN=Rps27l PE=2 SV=3; 40S ribosomal protein S27 OS=Mus musculus GN=Rps27 PE=1 SV=3	LTEGCSFR-LVQSPNSYFMDVK	2;2	2;2	2;2	>sp|Q6ZWY3|RS27L_MOUSE 40S ribosomal protein S27-like OS=Mus musculus GN=Rps27l PE=2 SV=3;>sp|Q6ZWU9|RS27_MOUSE 40S ribosomal protein S27 OS=Mus musculus GN=Rps27 PE=1 SV=3	2	2	2	2	25	25	25	9.4771	84	4.3101	9.5	9.5	15.5	25	9.5	15.5	25	25	15.5	9.5	9.5	15.5	9.5	15.5	25	15.5	0	0	25	0	9.5	9.5	15.5	9.5		77	33	Q6ZWY3	51316255	67941	Rps27l	Q6ZWY3
88	40S ribosomal protein S28 OS=Mus musculus GN=Rps28 PE=2 SV=1	40S ribosomal protein S28 OS=Mus musculus GN=Rps28 PE=2 SV=1	EGDVLTLLESER-EGDVLTLLESEREAR-GPVREGDVLTLLESER-VEFMDDTSR	4	4	4	>sp|P62858|RS28_MOUSE 40S ribosomal protein S28 OS=Mus musculus GN=Rps28 PE=2 SV=1	1	4	4	4	40.6	40.6	40.6	7.8409	69	68.275	36.2	36.2	27.5	27.5	23.2	40.6	17.4	36.2	23.2	27.5	30.4	23.2	36.2	13	27.5	23.2	40.6	23.2	27.5	40.6	27.5	23.2	27.5	36.2			35	P62858	51338653	54127	Rps28	P62858
89	40S ribosomal protein S3 OS=Mus musculus GN=Rps3 PE=1 SV=1	40S ribosomal protein S3 OS=Mus musculus GN=Rps3 PE=1 SV=1	ACYGVLR-AELNEFLTR-DEILPTTPISEQK-ELAEDGYSGVEVR-ELTAVVQK-FGFPEGSVELYAEK-FIMESGAK-FVADGIFK-FVADGIFKAELNEFLTR-FVDGLMIHSGDPVNYYVDTAVR-GCEVVVSGK-GGKPEPPAMPQPVPTA-GLCAIAQAESLR-IMLPWDPSGK-IRELTAVVQK-KPLPDHVSIVEPKDEILPTTPISEQK-LLGGLAVR-QGVLGIK-RFGFPEGSVELYAEK-TEIIILATR-TQNVLGEK-VTPTRTEIIILATR	22	22	22	>sp|P62908|RS3_MOUSE 40S ribosomal protein S3 OS=Mus musculus GN=Rps3 PE=1 SV=1	1	22	22	22	83.1	83.1	83.1	26.674	243	319.86	57.2	52.7	59.3	62.1	35.4	62.1	40.3	60.1	53.9	74.1	49.4	47.7	56.8	49.4	71.6	58	58.8	38.7	51.9	66.3	60.9	48.1	54.3	58		97;119;134	127;157;189;236	P62908	51703309	27050	Rps3	P62908
90	40S ribosomal protein S3a OS=Mus musculus GN=Rps3a PE=1 SV=3	40S ribosomal protein S3a OS=Mus musculus GN=Rps3a PE=1 SV=3	ACQSIYPLHDVFVR-ADGYEPPVQESV-EVQTNDLKEVVNK-LFCVGFTK-LITEDVQGK-TTDGYLLR-VFEVSLADLQNDEVAFR-VFEVSLADLQNDEVAFRK	8	8	8	>sp|P97351|RS3A_MOUSE 40S ribosomal protein S3a OS=Mus musculus GN=Rps3a PE=1 SV=3	1	8	8	8	31.1	31.1	31.1	29.885	264	18.798	6.4	3.4	11.7	15.2	6.4	13.3	0	8.3	16.7	13.3	0	13.6	9.5	3	26.1	18.2	6.4	14.4	11.7	31.1	3.4	13.3	6.4	13.3		139;201		P97351	3122836	20091	Rps3a	P97351
91	40S ribosomal protein S4, X isoform OS=Mus musculus GN=Rps4x PE=2 SV=2	40S ribosomal protein S4, X isoform OS=Mus musculus GN=Rps4x PE=2 SV=2	DANGNSFATR-ECLPLIIFLR-GNKPWISLPR-IGVITNR-LSNIFVIGK-LTIAEER-VNDTIQIDLETGK	7	7	7	>sp|P62702|RS4X_MOUSE 40S ribosomal protein S4, X isoform OS=Mus musculus GN=Rps4x PE=2 SV=2	1	7	7	7	25.1	25.1	25.1	29.597	263	10.465	9.9	0	9.9	14.8	16.3	19.8	0	6.1	22.4	12.5	11	9.9	18.6	11	9.9	8.4	14.8	3.4	3.4	14.8	14.8	13.7	21.3	16.3		41		P62702	50403629	20102	Rps4x	P62702
92	40S ribosomal protein S5 OS=Mus musculus GN=Rps5 PE=1 SV=3	40S ribosomal protein S5 OS=Mus musculus GN=Rps5 PE=1 SV=3	AQCPIVER-QAVDVSPLR-QAVDVSPLRR-RQAVDVSPLR-VNQAIWLLCTGAR-WSTDDVQINDISLQDYIAVK	6	6	6	>sp|P97461|RS5_MOUSE 40S ribosomal protein S5 OS=Mus musculus GN=Rps5 PE=1 SV=3	1	6	6	6	25.5	25.5	25.5	22.889	204	31.571	18.6	14.2	8.8	19.1	4.4	19.1	4.9	8.8	18.6	9.3	4.9	15.2	8.8	4.9	25	18.6	8.8	0	5.4	19.1	14.7	8.8	14.7	9.3		66;155		P97461	3122833	20103	Rps5	P97461
93	40S ribosomal protein S7 OS=Mus musculus GN=Rps7 PE=2 SV=1	40S ribosomal protein S7 OS=Mus musculus GN=Rps7 PE=2 SV=1	AIIIFVPVPQLK-AQQNNVEHKVETFSGVYK-DVNFEFPEFQL-EIEVGGGR-ELNITAAK-IVKPNGEKPDEFESGISQALLELEMNSDLK-KAIIIFVPVPQLK-TLTAVHDAILEDLVFPSEIVGK-TLTAVHDAILEDLVFPSEIVGKR-VETFSGVYK	10	10	10	>sp|P62082|RS7_MOUSE 40S ribosomal protein S7 OS=Mus musculus GN=Rps7 PE=2 SV=1	1	10	10	10	57.2	57.2	57.2	22.127	194	130	32.5	14.9	27.3	37.6	32	47.9	20.6	32.5	42.8	32.5	32.5	26.8	36.6	32.5	27.3	48.5	36.6	22.2	21.1	47.4	47.9	32.5	32.5	32.5				P62082	49065832	20115	Rps7	P62082
94	40S ribosomal protein S8 OS=Mus musculus GN=Rps8 PE=1 SV=2	40S ribosomal protein S8 OS=Mus musculus GN=Rps8 PE=1 SV=2	ADGYVLEGK-ELEFYLR-ISSLLEEQFQQGK-QWYESHYALPLGR	4	4	4	>sp|P62242|RS8_MOUSE 40S ribosomal protein S8 OS=Mus musculus GN=Rps8 PE=1 SV=2	1	4	4	4	20.2	20.2	20.2	24.205	208	7.5298	0	0	0	12.5	0	3.4	0	6.2	9.6	0	0	10.6	3.4	4.3	9.6	4.3	0	20.2	0	15.9	0	3.4	0	4.3				P62242	54039529	20116	Rps8	P62242
95	40S ribosomal protein S9 OS=Mus musculus GN=Rps9 PE=1 SV=3	40S ribosomal protein S9 OS=Mus musculus GN=Rps9 PE=1 SV=3	LDYILGLK-LFEGNALLR-QVVNIPSFIVR-RLFEGNALLR	4	4	4	>sp|Q6ZWN5|RS9_MOUSE 40S ribosomal protein S9 OS=Mus musculus GN=Rps9 PE=1 SV=3	1	4	4	4	14.9	14.9	14.9	22.591	194	4.482	0	0	0	0	0	4.6	0	0	5.7	0	0	0	0	0	5.2	0	0	10.8	0	9.8	0	0	0	0				Q6ZWN5	52783339	76846	Rps9	Q6ZWN5
96	40S ribosomal protein SA OS=Mus musculus GN=Rpsa PE=1 SV=4	40S ribosomal protein SA OS=Mus musculus GN=Rpsa PE=1 SV=4	ADHQPLTEASYVNLPTIALCNTDSPLR-AIVAIENPADVSVISSR-FAAATGATPIAGR-FLAAGTHLGGTNLDFQMEQYIYK-FTPGTFTNQIQAAFR-FTPGTFTNQIQAAFREPR-KSDGIYIINLK-LLVVTDPR-SDGIYIINLK-YVDIAIPCNNK	10	10	10	>sp|P14206|RSSA_MOUSE 40S ribosomal protein SA OS=Mus musculus GN=Rpsa PE=1 SV=4	1	10	10	10	43.4	43.4	43.4	32.838	295	323.31	40.7	34.2	35.6	43.4	43.4	43.1	35.6	35.3	31.9	35.6	43.4	43.1	35.6	31.9	35.3	43.4	25.1	31.5	35.3	43.4	35.6	26.4	43.4	35.3		148;163	34	P14206	146345507	102642689	Rpsa	P14206
97	4-aminobutyrate aminotransferase, mitochondrial OS=Mus musculus GN=Abat PE=1 SV=1	4-aminobutyrate aminotransferase, mitochondrial OS=Mus musculus GN=Abat PE=1 SV=1	IDIPSFDWPIAPFPR-NLLLAEVINIIK-TLLTGLLDLQAQYPQFISR-TVAGIIVEPIQSEGGDNHASDDFFR	4	4	4	>sp|P61922|GABT_MOUSE 4-aminobutyrate aminotransferase, mitochondrial OS=Mus musculus GN=Abat PE=1 SV=1	1	4	4	4	14.2	14.2	14.2	56.451	500	9.9054	3	0	0	9.2	5.4	5.4	5.4	5.4	14.2	0	8	5.4	0	0	2.4	5.4	0	0	9.2	9.2	0	0	2.4	5.4				P61922	48427970	268860	Abat	P61922
98	4F2 cell-surface antigen heavy chain OS=Mus musculus GN=Slc3a2 PE=1 SV=1	4F2 cell-surface antigen heavy chain OS=Mus musculus GN=Slc3a2 PE=1 SV=1	DAGGIAGLK-EEDTSLKLENLSLNPYEGLLLQFPFVA-FTGLSKEELLK-GQNEDPGSLLTQFR-IGDLQAFVGR-LGASNLPAGISLPASAK-LLLSTDSAR-LYQLLLFTLPGTPVFSYGDELGLQGALPGQPAK-MKEALSSWLQDGVDGFQFR-NQKDEINETDLK-QINPTLGSQEDFKDLLQSAK-SLLHGDFHALSSSPDLFSYIR-VAEDETEAGVK-VAGSPGWVR-YLVVLNFR	15	15	15	>sp|P10852|4F2_MOUSE 4F2 cell-surface antigen heavy chain OS=Mus musculus GN=Slc3a2 PE=1 SV=1	1	15	15	15	43.7	43.7	43.7	58.336	526	119.62	21.7	16.9	19.2	17.1	16	27.6	24.9	22.2	10.5	23.6	16	15.4	16.5	13.9	16.5	31.2	28.5	17.1	18.6	39.9	16.5	13.9	36.9	26.6				P10852	112804	17254	Slc3a2	P10852
99	4-trimethylaminobutyraldehyde dehydrogenase OS=Mus musculus GN=Aldh9a1 PE=1 SV=1	4-trimethylaminobutyraldehyde dehydrogenase OS=Mus musculus GN=Aldh9a1 PE=1 SV=1	AFEPATGR-AGAPPGLFNVVQGGAATGQFLCHHR-ANDTTFGLAAGVFTR-CQVLLEAAR-EIADKFINEVVK-EQGATVLCGGEVYVPEDPKLK-EVNLAVENAK-FINEVVK-IKLGDPLLEDTR-ISFTGSVPTGVK-KDEIATVETINNGK-LGDPLLEDTR-VEPVDASGTEK-VIATFACSGEK	14	14	14	>sp|Q9JLJ2|AL9A1_MOUSE 4-trimethylaminobutyraldehyde dehydrogenase OS=Mus musculus GN=Aldh9a1 PE=1 SV=1	1	14	14	14	32.4	32.4	32.4	53.514	494	88.017	23.1	16.8	21.3	14.6	16.6	24.1	16.8	11.9	25.7	17	28.1	16.6	18.4	11.5	17	20.9	2	9.9	17.2	24.3	14.8	25.9	16.6	16.6		45;74;220;355		Q9JLJ2	78099319	56752	Aldh9a1	Q9JLJ2
100	5'(3')-deoxyribonucleotidase, cytosolic type OS=Mus musculus GN=Nt5c PE=1 SV=1	5'(3')-deoxyribonucleotidase, cytosolic type OS=Mus musculus GN=Nt5c PE=1 SV=1	GFLANEQYGALRPDLAEK-LLSWSDNWR-RFPEEPHVPLEQR-VASVYESPGFFLNLEPIPGALDALR-VLVDMDGVLADFESGLLQGFR-WVEQNLGPEFVER	6	6	6	>sp|Q9JM14|NT5C_MOUSE 5(3)-deoxyribonucleotidase, cytosolic type OS=Mus musculus GN=Nt5c PE=1 SV=1	1	6	6	6	49.5	49.5	49.5	23.076	200	66.724	39	13.5	39	32.5	26.5	49.5	0	26.5	49.5	15.5	6.5	39	6.5	15.5	20	43	20	49.5	15.5	43	26	20	38.5	38.5			13	Q9JM14	38258249	50773	Nt5c	Q9JM14
101	5'-3' exoribonuclease 2 OS=Mus musculus GN=Xrn2 PE=1 SV=1	5'-3' exoribonuclease 2 OS=Mus musculus GN=Xrn2 PE=1 SV=1	DLTQNTAVSINFKDPQFAEDYVFK-DQPAFTPSGILTPHALGSR-LWEAGWK-NLTVILSDASAPGEGEHK-NSSPSISPNTSFASDGSPSPLGGIK-QWKPQLGFNR-YAWQGVALLPFVDER	7	7	7	>sp|Q9DBR1|XRN2_MOUSE 5-3 exoribonuclease 2 OS=Mus musculus GN=Xrn2 PE=1 SV=1	1	7	7	7	12.4	12.4	12.4	108.69	951	13.694	6.2	8.8	12.4	8.1	8.8	8.1	11.4	9.9	4.5	6.2	8	9.1	1.6	0	4.1	8.1	6.2	1.6	8.1	8.6	3.9	7.9	8.1	9.1				Q9DBR1	30173483	24128	Xrn2	Q9DBR1
102	55 kDa erythrocyte membrane protein OS=Mus musculus GN=Mpp1 PE=1 SV=1	55 kDa erythrocyte membrane protein OS=Mus musculus GN=Mpp1 PE=1 SV=1	ESAGLIPSPELQEWR-FAYPAPYTTRPPK-FVTGDIIQIINK-FVTGDIIQIINKDDSNWWQGR-HSSIFDQLDVVSYEEVVR-IAILDIEPQTLK-NISANEFLEFGSYQGNMFGTK-QGSLHVGDEILEINGTNVTNHSVDQLQK-SQYAHYFDLSLVNNSVDETLK-TAELSPFIVFIAPTDQGTQTEALQQLQK-TALSDLYLEHLLQK-TLVLIGASGVGR	12	12	12	>sp|P70290|EM55_MOUSE 55 kDa erythrocyte membrane protein OS=Mus musculus GN=Mpp1 PE=1 SV=1	1	12	12	12	43.6	43.6	43.6	52.227	466	166.06	31.8	13.9	23.8	31.8	17.4	26.4	23.4	29.8	27.9	21.2	23.4	27.3	17.4	5.2	18.2	31.8	23.8	14.4	21.2	43.6	24	23.4	36.3	31.8				P70290	2497509	17524	Mpp1	P70290
103	5-aminolevulinate synthase, erythroid-specific, mitochondrial OS=Mus musculus GN=Alas2 PE=1 SV=3	5-aminolevulinate synthase, erythroid-specific, mitochondrial OS=Mus musculus GN=Alas2 PE=1 SV=3	AAPEVQEDVK-HSIYVQAINYPTVPR	2	2	2	>sp|P08680|HEM0_MOUSE 5-aminolevulinate synthase, erythroid-specific, mitochondrial OS=Mus musculus GN=Alas2 PE=1 SV=3	1	2	2	2	4.3	4.3	4.3	64.753	587	2.8226	0	0	0	0	0	0	0	0	0	0	1.7	0	0	0	0	0	4.3	0	0	0	1.7	0	0	0				P08680	20141328	11656	Alas2	P08680
104	5'-AMP-activated protein kinase catalytic subunit alpha-1 OS=Mus musculus GN=Prkaa1 PE=1 SV=2	5'-AMP-activated protein kinase catalytic subunit alpha-1 OS=Mus musculus GN=Prkaa1 PE=1 SV=2	IGHYILGDTLGVGTFGK-TYLLDFR-VPFLVAETPR	3	3	3	>sp|Q5EG47|AAPK1_MOUSE 5-AMP-activated protein kinase catalytic subunit alpha-1 OS=Mus musculus GN=Prkaa1 PE=1 SV=2	1	3	3	3	6.1	6.1	6.1	63.928	559	3.9999	1.3	1.8	1.8	4.3	0	6.1	6.1	4.3	1.3	1.8	0	4.8	3	0	1.3	4.3	6.1	3	3	3	0	1.3	1.8	1.8				Q5EG47	254763243	105787	Prkaa1	Q5EG47
105	5'-AMP-activated protein kinase subunit beta-1 OS=Mus musculus GN=Prkab1 PE=1 SV=2; 5'-AMP-activated protein kinase subunit beta-2 OS=Mus musculus GN=Prkab2 PE=1 SV=1	5'-AMP-activated protein kinase subunit beta-1 OS=Mus musculus GN=Prkab1 PE=1 SV=2	APPILPPHLLQVILNK-FFVDGQWTHDPSEPIVTSQLGTVNNIIQVK-YVTTLLYKPI	3;1	3;1	3;1	>sp|Q9R078|AAKB1_MOUSE 5-AMP-activated protein kinase subunit beta-1 OS=Mus musculus GN=Prkab1 PE=1 SV=2	2	3	3	3	20.7	20.7	20.7	30.308	270	10.913	11.1	11.1	0	0	11.1	0	0	0	5.9	0	0	0	0	0	0	17	0	0	5.9	20.7	0	0	11.1	0				Q9R078	22096265	19079	Prkab1	Q9R078
106	5'-AMP-activated protein kinase subunit gamma-1 OS=Mus musculus GN=Prkag1 PE=1 SV=2; 5'-AMP-activated protein kinase subunit gamma-2 OS=Mus musculus GN=Prkag2 PE=1 SV=2	5'-AMP-activated protein kinase subunit gamma-1 OS=Mus musculus GN=Prkag1 PE=1 SV=2	AFFALVTNGVR-EVYLQDSFKPLVCISPNASLFDAVSSLIR-GIVSLSDILQALVLTGGEK-LPVIDPESGNTLYILTHK-LVVFDTSLQVK-TYNNLDVSVTK-VSALPVVDEK-FDVINLAAEK	8;1	8;1	8;1	>sp|O54950|AAKG1_MOUSE 5-AMP-activated protein kinase subunit gamma-1 OS=Mus musculus GN=Prkag1 PE=1 SV=2	2	8	8	8	36.1	36.1	36.1	37.52	330	32.365	33	6.7	3.3	12.1	14.5	12.1	6.7	12.1	8.8	20.9	17.6	20.9	0	0	12.1	21.2	3	0	6.7	30	0	6.4	17.6	6.4		130		O54950	93141006	19082	Prkag1	O54950
107	5'-nucleotidase OS=Mus musculus GN=Nt5e PE=1 SV=2	5'-nucleotidase OS=Mus musculus GN=Nt5e PE=1 SV=2	ETPFLSNPGTNLVFEDEISALQPEVDKLK-HDSGDQDISVVSEYISK-QVPVVQAYAFGK-YPFIVTADDGR	4	4	4	>sp|Q61503|5NTD_MOUSE 5-nucleotidase OS=Mus musculus GN=Nt5e PE=1 SV=2	1	4	4	4	12	12	12	63.864	576	4.6371	8	5	5	0	5	5	10.1	10.1	0	0	2.1	5	0	0	0	5	8	6.9	7.1	7.1	10.1	3	8	8				Q61503	13431280	23959	Nt5e	Q61503
108	60 kDa heat shock protein, mitochondrial OS=Mus musculus GN=Hspd1 PE=1 SV=1	60 kDa heat shock protein, mitochondrial OS=Mus musculus GN=Hspd1 PE=1 SV=1	AAVEEGIVLGGGCALLR-ALMLQGVDLLADAVAVTMGPK-CEFQDAYVLLSEK-CEFQDAYVLLSEKK-CIPALDSLKPANEDQK-DIGNIISDAMK-GANPVEIR-GIIDPTK-GYISPYFINTSK-IGIEIIK-ILQSSSEVGYDAMLGDFVNMVEK-IPAMTIAK-IQEITEQLDITTSEYEKEK-ISSVQSIVPALEIANAHR-KISSVQSIVPALEIANAHR-KPLVIIAEDVDGEALSTLVLNR-LSDGVAVLK-LVQDVANNTNEEAGDGTTTATVLAR-NAGVEGSLIVEK-QSKPVTTPEEIAQVATISANGDK-QSKPVTTPEEIAQVATISANGDKDIGNIISDAMK-TALLDAAGVASLLTTAEAVVTEIPK-TALLDAAGVASLLT…	31	31	31	>sp|P63038|CH60_MOUSE 60 kDa heat shock protein, mitochondrial OS=Mus musculus GN=Hspd1 PE=1 SV=1	1	31	31	31	65.1	65.1	65.1	60.955	573	323.31	57.1	36	35.4	53.9	55.8	53.4	53.2	51	49.4	55.8	38.2	56	32.1	27.4	47.5	49.7	50.1	39.1	49	60	44.2	44.3	51.3	48.3		237;442;447	40;55;217;356;477	P63038	51702252	15510	Hspd1	P63038
109	60S acidic ribosomal protein P0 OS=Mus musculus GN=Rplp0 PE=1 SV=3	60S acidic ribosomal protein P0 OS=Mus musculus GN=Rplp0 PE=1 SV=3	AFLADPSAFAAAAPAAAATTAAPAAAAAPAK-AFLADPSAFAAAAPAAAATTAAPAAAAAPAKAEAK-AGAIAPCEVTVPAQNTGLGPEK-CFIVGADNVGSK-DMLLANKVPAAAR-EDLTEIR-GHLENNPALEK-GNVGFVFTK-GNVGFVFTKEDLTEIR-GTIEILSDVQLIK-IIQLLDDYPK-NVASVCLQIGYPTVASVPHSIINGYK-TSFFQALGITTK-VLALSVETEYTFPLTEK	14	14	14	>sp|P14869|RLA0_MOUSE 60S acidic ribosomal protein P0 OS=Mus musculus GN=Rplp0 PE=1 SV=3	1	14	14	14	59	59	59	34.216	317	323.31	51.4	51.4	53.6	48.3	59	55.5	50.8	46.7	42	49.5	54.9	46.7	34.4	31.5	49.5	49.5	36.6	46.7	46.7	50.8	39.1	37.9	59	46.1		27;119;226	101	P14869	46397819	11837	Rplp0	P14869
110	60S acidic ribosomal protein P1 OS=Mus musculus GN=Rplp1 PE=2 SV=1	60S acidic ribosomal protein P1 OS=Mus musculus GN=Rplp1 PE=2 SV=1	AAGVSVEPFWPGLFAK-ALANVNIGSLICNVGAGGPAPAAGAAPAGGAAPSTAAAPAEEK	2	2	2	>sp|P47955|RLA1_MOUSE 60S acidic ribosomal protein P1 OS=Mus musculus GN=Rplp1 PE=2 SV=1	1	2	2	2	51.8	51.8	51.8	11.475	114	201.46	51.8	51.8	14	51.8	51.8	51.8	51.8	14	51.8	51.8	14	51.8	14	14	14	14	51.8	51.8	51.8	51.8	51.8	14	51.8	51.8		61		P47955	1350781	56040	Rplp1	P47955
111	60S acidic ribosomal protein P2 OS=Mus musculus GN=Rplp2 PE=1 SV=3	60S acidic ribosomal protein P2 OS=Mus musculus GN=Rplp2 PE=1 SV=3	ILDSVGIEADDDRLNK-LASVPAGGAVAVSAAPGSAAPAAGSAPAAAEEK-LASVPAGGAVAVSAAPGSAAPAAGSAPAAAEEKK-NIEDVIAQGVGK-VISELNGK-YVASYLLAALGGNSSPSAK	6	6	6	>sp|P99027|RLA2_MOUSE 60S acidic ribosomal protein P2 OS=Mus musculus GN=Rplp2 PE=1 SV=3	1	6	6	6	77.4	77.4	77.4	11.651	115	232.23	77.4	76.5	69.6	77.4	76.5	77.4	70.4	56.5	76.5	66.1	47.8	63.5	47.8	40.9	47.8	76.5	69.6	40.9	40.9	77.4	76.5	69.6	77.4	69.6				P99027	46397855	67186	Rplp2	P99027
112	60S ribosomal protein L10a OS=Mus musculus GN=Rpl10a PE=1 SV=3	60S ribosomal protein L10a OS=Mus musculus GN=Rpl10a PE=1 SV=3	DTLYEAVR-ILGPGLNK-KYDAFLASESLIK	3	3	3	>sp|P53026|RL10A_MOUSE 60S ribosomal protein L10a OS=Mus musculus GN=Rpl10a PE=1 SV=3	1	3	3	3	13.4	13.4	13.4	24.916	217	10.345	9.7	9.7	6	6	13.4	13.4	6	9.7	13.4	9.7	3.7	9.7	13.4	13.4	13.4	9.7	9.7	9.7	6	13.4	6	13.4	6	13.4				P53026	1709972	---	Rpl10a	P53026
113	60S ribosomal protein L11 OS=Mus musculus GN=Rpl11 PE=1 SV=4	60S ribosomal protein L11 OS=Mus musculus GN=Rpl11 PE=1 SV=4	AEEILEK-VLEQLTGQTPVFSK-YDGIILPGK	3	3	3	>sp|Q9CXW4|RL11_MOUSE 60S ribosomal protein L11 OS=Mus musculus GN=Rpl11 PE=1 SV=4	1	3	3	3	16.9	16.9	16.9	20.252	178	99.361	16.9	16.9	16.9	16.9	16.9	16.9	7.9	16.9	16.9	16.9	16.9	16.9	16.9	16.9	16.9	16.9	16.9	16.9	16.9	16.9	16.9	16.9	16.9	16.9				Q9CXW4	51704334	67025	Rpl11	Q9CXW4
114	60S ribosomal protein L12 OS=Mus musculus GN=Rpl12 PE=1 SV=2	60S ribosomal protein L12 OS=Mus musculus GN=Rpl12 PE=1 SV=2	CTGGEVGATSALAPK-EILGTAQSVGCNVDGR-ELSGTIK-HPHDIIDDINSGAVECPAS-HSGNITFDEIVNIAR-IGPLGLSPK-QAQIEVVPSASALIIK	7	7	7	>sp|P35979|RL12_MOUSE 60S ribosomal protein L12 OS=Mus musculus GN=Rpl12 PE=1 SV=2	1	7	7	7	58.8	58.8	58.8	17.804	165	323.31	33.3	38.2	34.5	43	43	58.8	37.6	58.8	43	43	24.2	33.9	15.2	37.6	43	41.8	38.2	19.4	47.3	47.3	33.3	24.2	47.3	47.3		17;141;162		P35979	32130449	269261	Rpl12	P35979
116	60S ribosomal protein L15 OS=Mus musculus GN=Rpl15 PE=2 SV=4	60S ribosomal protein L15 OS=Mus musculus GN=Rpl15 PE=2 SV=4	SLQSVAEER-VLNSYWVGEDSTYK	2	2	2	>sp|Q9CZM2|RL15_MOUSE 60S ribosomal protein L15 OS=Mus musculus GN=Rpl15 PE=2 SV=4	1	2	2	2	11.3	11.3	11.3	24.146	204	2.3991	0	0	0	0	4.4	0	0	0	0	0	0	4.4	0	6.9	0	11.3	0	11.3	4.4	11.3	4.4	4.4	6.9	11.3				Q9CZM2	47117909	66480	Rpl15	Q9CZM2
117	60S ribosomal protein L17 OS=Mus musculus GN=Rpl17 PE=2 SV=3	60S ribosomal protein L17 OS=Mus musculus GN=Rpl17 PE=2 SV=3	EQIVPKPEEEVAQK-GLDVDSLVIEHIQVNK-YSLDPENPTK	3	3	3	>sp|Q9CPR4|RL17_MOUSE 60S ribosomal protein L17 OS=Mus musculus GN=Rpl17 PE=2 SV=3	1	3	3	3	21.7	21.7	21.7	21.423	184	7.6421	8.7	16.3	0	5.4	0	0	5.4	5.4	14.1	5.4	0	7.6	5.4	8.7	0	8.7	0	21.7	0	16.3	0	14.1	0	5.4				Q9CPR4	22001904	---	Rpl17	Q9CPR4
118	60S ribosomal protein L18 OS=Mus musculus GN=Rpl18 PE=2 SV=3	60S ribosomal protein L18 OS=Mus musculus GN=Rpl18 PE=2 SV=3	GTVLLSGPR-ILTFDQLALESPK	2	2	2	>sp|P35980|RL18_MOUSE 60S ribosomal protein L18 OS=Mus musculus GN=Rpl18 PE=2 SV=3	1	2	2	2	11.7	11.7	11.7	21.644	188	2.9718	0	4.8	4.8	4.8	0	4.8	0	4.8	0	0	0	0	4.8	4.8	0	0	4.8	11.7	4.8	4.8	4.8	0	0	4.8				P35980	21264500	19899	Rpl18	P35980
120	60S ribosomal protein L22 OS=Mus musculus GN=Rpl22 PE=1 SV=2	60S ribosomal protein L22 OS=Mus musculus GN=Rpl22 PE=1 SV=2	AGNLGGGVVTIER-ITVTSEVPFSK	2	2	2	>sp|P67984|RL22_MOUSE 60S ribosomal protein L22 OS=Mus musculus GN=Rpl22 PE=1 SV=2	1	2	2	2	18.8	18.8	18.8	14.759	128	4.539	18.8	18.8	0	18.8	0	18.8	10.2	18.8	18.8	8.6	0	18.8	0	0	18.8	18.8	8.6	10.2	18.8	18.8	0	0	0	18.8				P67984	54039136	102642602	Rpl22	P67984
121	60S ribosomal protein L23 OS=Mus musculus GN=Rpl23 PE=1 SV=1	60S ribosomal protein L23 OS=Mus musculus GN=Rpl23 PE=1 SV=1	IASNAGSIA-ISLGLPVGAVINCADNTGAK-NLYIISVK	3	3	3	>sp|P62830|RL23_MOUSE 60S ribosomal protein L23 OS=Mus musculus GN=Rpl23 PE=1 SV=1	1	3	3	3	26.4	26.4	26.4	14.865	140	7.0772	5.7	12.1	5.7	26.4	12.1	12.1	0	5.7	12.1	6.4	5.7	5.7	0	0	5.7	5.7	12.1	0	6.4	12.1	0	6.4	0	6.4		28		P62830	51338640	100044627	Rpl23	P62830
122	60S ribosomal protein L27a OS=Mus musculus GN=Rpl27a PE=2 SV=5	60S ribosomal protein L27a OS=Mus musculus GN=Rpl27a PE=2 SV=5	LWTLVSEQTR-TGVAPIIDVVR	2	2	2	>sp|P14115|RL27A_MOUSE 60S ribosomal protein L27a OS=Mus musculus GN=Rpl27a PE=2 SV=5	1	2	2	2	14.2	14.2	14.2	16.605	148	6.4579	14.2	7.4	0	7.4	0	7.4	0	7.4	7.4	0	0	7.4	0	7.4	0	7.4	7.4	0	7.4	14.2	7.4	0	0	7.4				P14115	306526288	26451	Rpl27a	P14115
123	60S ribosomal protein L30 OS=Mus musculus GN=Rpl30 PE=2 SV=2	60S ribosomal protein L30 OS=Mus musculus GN=Rpl30 PE=2 SV=2	LVILANNCPALR-SLESINSR-VCTLAIIDPGDSDIIR	3	3	3	>sp|P62889|RL30_MOUSE 60S ribosomal protein L30 OS=Mus musculus GN=Rpl30 PE=2 SV=2	1	3	3	3	31.3	31.3	31.3	12.784	115	55.593	31.3	13.9	20.9	31.3	13.9	31.3	31.3	10.4	13.9	24.3	13.9	24.3	13.9	13.9	31.3	31.3	31.3	31.3	31.3	20.9	31.3	13.9	13.9	31.3		52;92		P62889	51702806	19946	Rpl30	P62889
124	60S ribosomal protein L31 OS=Mus musculus GN=Rpl31 PE=1 SV=1	60S ribosomal protein L31 OS=Mus musculus GN=Rpl31 PE=1 SV=1	LYTLVTYVPVTTFK-NEDEDSPNKLYTLVTYVPVTTFK-NLQTVNVDEN-SAINEVVTR	4	4	4	>sp|P62900|RL31_MOUSE 60S ribosomal protein L31 OS=Mus musculus GN=Rpl31 PE=1 SV=1	1	4	4	4	33.6	33.6	33.6	14.463	125	8.2811	26.4	11.2	0	26.4	7.2	18.4	0	0	18.4	7.2	0	26.4	7.2	7.2	7.2	11.2	18.4	7.2	11.2	33.6	19.2	7.2	15.2	7.2				P62900	51702808	114641	Rpl31	P62900
126	60S ribosomal protein L5 OS=Mus musculus GN=Rpl5 PE=1 SV=3	60S ribosomal protein L5 OS=Mus musculus GN=Rpl5 PE=1 SV=3	DIICQIAYAR-GAVDGGLSIPHSTK-QFSQYIK-VGLTNYAAAYCTGLLLAR	4	4	4	>sp|P47962|RL5_MOUSE 60S ribosomal protein L5 OS=Mus musculus GN=Rpl5 PE=1 SV=3	1	4	4	4	16.5	16.5	16.5	34.4	297	9.4004	0	0	0	6.1	6.1	0	0	6.1	0	0	6.1	6.1	0	0	0	0	2.4	6.1	0	14.1	0	3.4	0	0		62;100		P47962	22002065	100503670	Rpl5	P47962
127	60S ribosomal protein L6 OS=Mus musculus GN=Rpl6 PE=1 SV=3	60S ribosomal protein L6 OS=Mus musculus GN=Rpl6 PE=1 SV=3	AVDLQILPK-AVPQLQGYLR-FVIATSTK	3	3	3	>sp|P47911|RL6_MOUSE 60S ribosomal protein L6 OS=Mus musculus GN=Rpl6 PE=1 SV=3	1	3	3	3	9.1	9.1	9.1	33.509	296	5.326	0	0	0	0	0	3.4	0	0	0	0	0	0	0	0	0	3.4	0	9.1	0	3	0	0	0	3.4				P47911	62296680	19988	Rpl6	P47911
128	60S ribosomal protein L9 OS=Mus musculus GN=Rpl9 PE=1 SV=2	60S ribosomal protein L9 OS=Mus musculus GN=Rpl9 PE=1 SV=2	DELILEGNDIELVSNSAALIQQATTVK-DFNHINVELSLLGK-FLDGIYVSEK-GVTLGFR-KFLDGIYVSEK-SVYAHFPINVVIQENGSLVEIR-TILSNQTVDIPENVEITLK	7	7	7	>sp|P51410|RL9_MOUSE 60S ribosomal protein L9 OS=Mus musculus GN=Rpl9 PE=1 SV=2	1	7	7	7	52.1	52.1	52.1	21.881	192	85.66	26	3.6	19.3	52.1	15.1	26.6	0	18.8	52.1	26.6	8.9	26.6	26	16.1	19.3	51.6	26	17.2	5.2	26.6	46.4	26.6	20.8	26.6				P51410	21903459	20005	Rpl9	P51410
129	60S ribosome subunit biogenesis protein NIP7 homolog OS=Mus musculus GN=Nip7 PE=2 SV=1	60S ribosome subunit biogenesis protein NIP7 homolog OS=Mus musculus GN=Nip7 PE=2 SV=1	LHVTALDYLAPYAK-VYYVSEMMLK	2	2	2	>sp|Q9CXK8|NIP7_MOUSE 60S ribosome subunit biogenesis protein NIP7 homolog OS=Mus musculus GN=Nip7 PE=2 SV=1	1	2	2	2	13.3	13.3	13.3	20.451	180	3.8011	7.8	7.8	0	5.6	7.8	13.3	7.8	7.8	13.3	7.8	0	13.3	13.3	7.8	5.6	0	0	5.6	13.3	7.8	7.8	0	5.6	13.3				Q9CXK8	56404663	66164	Nip7	Q9CXK8
130	6-phosphogluconate dehydrogenase, decarboxylating OS=Mus musculus GN=Pgd PE=1 SV=3	6-phosphogluconate dehydrogenase, decarboxylating OS=Mus musculus GN=Pgd PE=1 SV=3	AGQAVDDFIEK-AIFQAIAAK-CLSSLKEER-DAFERNPELQNLLLDDFFK-GILFVGSGVSGGEEGAR-HEMLPANLIQAQR-IISYAQGFMLLR-LVPLLDTGDIIIDGGNSEYR-LVPLLDTGDIIIDGGNSEYRDTTR-NPELQNLLLDDFFK-SAVDNCQDSWR-SFLEDIR-TVSKVDDFLANEAK-VDDFLANEAK-VGTGEPCCDWVGDEGAGHFVK-VVGAQSLK-WTAISALEYGMPVTLIGEAVFAR-YGPSLMPGGNK	18	18	18	>sp|Q9DCD0|6PGD_MOUSE 6-phosphogluconate dehydrogenase, decarboxylating OS=Mus musculus GN=Pgd PE=1 SV=3	1	18	18	18	43.3	43.3	43.3	53.247	483	323.31	29.4	31.7	24	25.3	28.2	25.3	25.7	24.6	21.9	30.2	31.9	28.2	18.8	21.9	19.9	26.7	4.1	18.2	20.7	26.3	19.5	24.4	28.8	24.4		170;171;289;402	142;276;340;437	Q9DCD0	20978409	110208	Pgd	Q9DCD0
131	6-phosphogluconolactonase OS=Mus musculus GN=Pgls PE=2 SV=1	6-phosphogluconolactonase OS=Mus musculus GN=Pgls PE=2 SV=1	DLPAAAAPAGPASFAR-EGTLPAALVQPR-FALGLSGGSLVSMLAR-ILEDKEGTLPAALVQPR-IVAPISDSPKPPPQR-LLSVPFEK-LPIPDSQVLTINPALPVEDAAEDYAR-LPIPDSQVLTINPALPVEDAAEDYARK-LVPFDHAESTYGLYR-TGALCWFLDEAAAR-VTLTLPVLNAAQSIIFVATGEGK-WTLGFCDER	12	12	12	>sp|Q9CQ60|6PGL_MOUSE 6-phosphogluconolactonase OS=Mus musculus GN=Pgls PE=2 SV=1	1	12	12	12	62.3	62.3	62.3	27.254	257	239.12	56	27.2	37.7	56	37.4	47.1	0	37.7	50.2	52.5	55.6	35	46.7	46.7	27.6	43.6	46.7	46.7	41.2	61.9	46.7	46.7	47.1	52.5		78;236	53	Q9CQ60	51701349	66171	Pgls	Q9CQ60
132	78 kDa glucose-regulated protein OS=Mus musculus GN=Hspa5 PE=1 SV=3	78 kDa glucose-regulated protein OS=Mus musculus GN=Hspa5 PE=1 SV=3	AKFEELNMDLFR-DAGTIAGLNVMR-DNHLLGTFDLTGIPPAPR-EFFNGKEPSR-ELEEIVQPIISK-FEELNMDLFR-IDTRNELESYAYSLK-IEIESFFEGEDFSETLTR-IEWLESHQDADIEDFK-IEWLESHQDADIEDFKAK-IINEPTAAAIAYGLDKR-ITITNDQNR-ITPSYVAFTPEGER-KSDIDEIVLVGGSTR-KSQIFSTASDNQPTVTIK-KVTHAVVTVPAYFNDAQR-LTPEEIER-LYGSGGPPPTGEEDTSEKDEL-MKETAEAYLGK-NELESYAYSLK-NGRVEIIANDQGNR-NQLTSNPENTVFDAK-NQLTSNPENTVFDAKR-SDIDEIVLVGGSTR-SQIFSTASDNQPTVTIK-TFAPEEISAMVLTK-…	33	31	31	>sp|P20029|GRP78_MOUSE 78 kDa glucose-regulated protein OS=Mus musculus GN=Hspa5 PE=1 SV=3	1	33	31	31	51.1	51.1	51.1	72.421	655	323.31	45.6	44	43.2	45.6	47.3	48.7	46	47.2	36	47.8	39.1	43.5	46.3	46	44.9	45.6	46	45.6	49.3	51.1	45.8	41.7	47.3	50.5			149;154;197;333	P20029	2506545	14828	Hspa5	P20029
133	ABI gene family member 3 OS=Mus musculus GN=Abi3 PE=2 SV=3	ABI gene family member 3 OS=Mus musculus GN=Abi3 PE=2 SV=3	EIGTLATVVR-VVTLYPYTR	2	2	2	>sp|Q8BYZ1|ABI3_MOUSE ABI gene family member 3 OS=Mus musculus GN=Abi3 PE=2 SV=3	1	2	2	2	5.2	5.2	5.2	39.106	367	2.9521	5.2	2.5	2.7	0	2.5	2.7	2.5	5.2	0	0	5.2	2.5	2.5	0	0	0	0	2.5	2.5	0	2.5	2.5	0	0				Q8BYZ1	341940609	66610	Abi3	Q8BYZ1
135	Acetyl-CoA acetyltransferase, mitochondrial OS=Mus musculus GN=Acat1 PE=1 SV=1	Acetyl-CoA acetyltransferase, mitochondrial OS=Mus musculus GN=Acat1 PE=1 SV=1	DGLTDVYNK-ENGTITAANASTLNDGAAALVLMTAEAAQR-FASEITPITISVK-GATPYGGVK-GATPYGGVKLEDLIVK-IAAFADAAVDPIDFPLAPAYAVPK-LEDLIVK-LEDLIVKDGLTDVYNK-LGTAAIQGAIEK-QATLGAGLPISTPCTTVNK-QEQDTYALSSYTR-TPIGSFLGSLASQPATK	12	12	12	>sp|Q8QZT1|THIL_MOUSE Acetyl-CoA acetyltransferase, mitochondrial OS=Mus musculus GN=Acat1 PE=1 SV=1	1	12	12	12	36.1	36.1	36.1	44.816	424	225.14	36.1	31.6	18.9	22.4	36.1	33	24.5	29	24.5	36.1	36.1	23.3	23.3	23.3	23.3	30.2	4.7	16.7	21.2	34	15.1	36.1	36.1	23.3		116		Q8QZT1	52000832	110446	Acat1	Q8QZT1
137	Acetyl-coenzyme A synthetase 2-like, mitochondrial OS=Mus musculus GN=Acss1 PE=1 SV=1	Acetyl-coenzyme A synthetase 2-like, mitochondrial OS=Mus musculus GN=Acss1 PE=1 SV=1	AVITFNQGLR-FVDAYFR-GQDLGDTTTLEDPSVITEILSAFQK-SPETIALIWERDEPGTEVR-TEGGYYQITGR-YAVPDQILVVK	6	6	6	>sp|Q99NB1|ACS2L_MOUSE Acetyl-coenzyme A synthetase 2-like, mitochondrial OS=Mus musculus GN=Acss1 PE=1 SV=1	1	6	6	6	12.2	12.2	12.2	74.622	682	12.56	5.3	0	1	2.8	3.7	9.7	6.7	9.7	9.5	1.6	1.6	3.2	6.7	4.4	3.1	5.3	8.1	1.6	9.7	6.5	3.2	3.7	5.3	0				Q99NB1	30172937	68738	Acss1	Q99NB1
139	Acid ceramidase OS=Mus musculus GN=Asah1 PE=1 SV=1	Acid ceramidase OS=Mus musculus GN=Asah1 PE=1 SV=1	DAQWVGFITR-ESLDVYELDPK-GPVPWHTINLDLPPYK-ILVNSITSLVNTFVPSGK-IMAPVYFILGGK-KDAQWVGFITR-KESLDVYELDPK-LTVFTTLMDVTK-NLSFATIYDVLSTKPVLNK-NTLFIDDR-SGEGCVITR-STYPPSGPTYR-WYVVQTNYDR	13	13	13	>sp|Q9WV54|ASAH1_MOUSE Acid ceramidase OS=Mus musculus GN=Asah1 PE=1 SV=1	1	13	13	13	35	35	35	44.669	394	323.31	32.5	32.7	18.3	28.7	26.1	25.1	25.9	30.2	32.7	28.7	21.1	25.9	30.7	24.6	32.2	29.7	15.2	22.6	28.2	32.7	29.7	28.7	31	28.7		291	275;373	Q9WV54	8134329	11886	Asah1	Q9WV54
140	Acid sphingomyelinase-like phosphodiesterase 3a OS=Mus musculus GN=Smpdl3a PE=2 SV=2	Acid sphingomyelinase-like phosphodiesterase 3a OS=Mus musculus GN=Smpdl3a PE=2 SV=2	NGNPLNSVFVAPAVTPVK-SLYALVQQFATK-VYIIAHVPVGYLPYATDTPAIR	3	3	3	>sp|P70158|ASM3A_MOUSE Acid sphingomyelinase-like phosphodiesterase 3a OS=Mus musculus GN=Smpdl3a PE=2 SV=2	1	3	3	3	11.7	11.7	11.7	49.857	445	15.971	7.6	6.7	11.7	7.6	11.7	11.7	11.7	6.7	4.9	11.7	9	11.7	0	0	7.6	11.7	7.6	9	11.7	11.7	11.7	7.6	9	11.7				P70158	341940248	57319	Smpdl3a	P70158
141	Acidic leucine-rich nuclear phosphoprotein 32 family member A OS=Mus musculus GN=Anp32a PE=1 SV=1; Putative acidic leucine-rich nuclear phosphoprotein 32 family member C OS=Mus musculus GN=Anp32c PE=2 SV=3	Acidic leucine-rich nuclear phosphoprotein 32 family member A OS=Mus musculus GN=Anp32a PE=1 SV=1	DLSTIEPLK-IEGLTDEFEELEFLSTINVGLTSISNLPK-LLPQVMYLDGYDR-LLPQVMYLDGYDRDNK-SLDLFNCEVTNLNAYR-SLDLFNCEVTNLNAYRENVFK-ELVLDNCK-ISGDLEVLAEK-LELSENR	9;2	9;2	7;1	>sp|O35381|AN32A_MOUSE Acidic leucine-rich nuclear phosphoprotein 32 family member A OS=Mus musculus GN=Anp32a PE=1 SV=1	2	9	9	7	40.9	40.9	34.8	28.537	247	142.67	25.9	10.5	10.5	23.5	22.3	17	6.1	25.9	24.3	14.2	20.6	20.6	20.6	22.3	25.9	19.4	22.3	28.7	17	37.2	17	20.6	28.7	22.3		27;123	143	O35381	46395611	11737	Anp32a	O35381
142	Acidic leucine-rich nuclear phosphoprotein 32 family member B OS=Mus musculus GN=Anp32b PE=1 SV=1	Acidic leucine-rich nuclear phosphoprotein 32 family member B OS=Mus musculus GN=Anp32b PE=1 SV=1	DISTLEPLKR-IFGGLDR-LAEELPSLTHLNLSGNNLK-LELSENRIFGGLDR-LLPQLSYLDGYDR-SLDLFGCEVTNR	8	6	6	>sp|Q9EST5|AN32B_MOUSE Acidic leucine-rich nuclear phosphoprotein 32 family member B OS=Mus musculus GN=Anp32b PE=1 SV=1	1	8	6	6	27.9	25	25	31.078	272	117.99	24.3	19.9	17.3	19.9	19.9	19.9	19.9	24.3	19.9	21.7	24.3	24.3	24.3	17.3	19.9	14.7	27.9	16.9	19.9	23.5	19.9	19.9	24.3	19.9		27;123		Q9EST5	81917437	67628	Anp32b	Q9EST5
143	Acidic leucine-rich nuclear phosphoprotein 32 family member E OS=Mus musculus GN=Anp32e PE=1 SV=2	Acidic leucine-rich nuclear phosphoprotein 32 family member E OS=Mus musculus GN=Anp32e PE=1 SV=2	CPNLTYLNLSGNK-DLSTVEALQNLK-IKDLSTVEALQNLK-KLELSDNIISGGLEVLAEK-LELSDNIISGGLEVLAEK-SLDLFNCEITNLEDYR	6	6	6	>sp|P97822|AN32E_MOUSE Acidic leucine-rich nuclear phosphoprotein 32 family member E OS=Mus musculus GN=Anp32e PE=1 SV=2	1	6	6	6	23.8	23.8	23.8	29.622	260	220.79	23.8	23.8	17.7	17.7	17.7	18.8	17.7	18.8	23.8	23.8	23.1	23.8	17.7	11.5	23.8	23.8	17.7	23.8	12.7	23.8	18.8	17.7	23.8	23.8		87;123		P97822	30580338	66471	Anp32e	P97822
144	Aconitate hydratase, mitochondrial OS=Mus musculus GN=Aco2 PE=1 SV=1	Aconitate hydratase, mitochondrial OS=Mus musculus GN=Aco2 PE=1 SV=1	AKDINQEVYNFLATAGAK-CTTDHISAAGPWLK-DGYAQILR-DINQEVYNFLATAGAK-EGWPLDIR-FKLEAPDADELPR-FNPETDFLTGK-GHLDNISNNLLIGAINIENGK-HPNGTQETILLNHTFNETQIEWFR-IVYGHLDDPANQEIER-KQGLLPLTFADPSDYNK-LEAPDADELPR-LTGSLSGWTSPK-LTIQGLK-NAVTQEFGPVPDTAR-NDANPETHAFVTSPEIVTALAIAGTLK-NTIVTSYNR-QGLLPLTFADPSDYNK-SQFTITPGSEQIR-VAGILTVK-VDVSPTSQR-WVVIGDENYGEGSSR	22	22	22	>sp|Q99KI0|ACON_MOUSE Aconitate hydratase, mitochondrial OS=Mus musculus GN=Aco2 PE=1 SV=1	1	22	22	22	34	34	34	85.462	780	245.64	30.3	25	25.4	26.4	26.3	28.1	27.1	22.6	31.8	26.9	24.4	26.9	23.2	25.4	24.1	24.2	23.1	26.2	25.9	27.4	23.2	25.9	24.6	26.3		592		Q99KI0	60391212	11429	Aco2	Q99KI0
145	Actin, alpha cardiac muscle 1 OS=Mus musculus GN=Actc1 PE=1 SV=1; Actin, aortic smooth muscle OS=Mus musculus GN=Acta2 PE=1 SV=1; Actin, gamma-enteric smooth muscle OS=Mus musculus GN=Actg2 PE=1 SV=1; Actin, alpha skeletal muscle OS=Mus musculus GN=Acta1 PE=1 SV=1	Actin, alpha cardiac muscle 1 OS=Mus musculus GN=Actc1 PE=1 SV=1; Actin, aortic smooth muscle OS=Mus musculus GN=Acta2 PE=1 SV=1; Actin, gamma-enteric smooth muscle OS=Mus musculus GN=Actg2 PE=1 SV=1; Actin, alpha skeletal muscle OS=Mus musculus GN=Acta1 PE=1 SV=1	QEYDEAGPSIVHR-DLYANNVLSGGTTMYPGIADR-KDLYANNVLSGGTTMYPGIADR-GYSFVTTAER-GYSFVTTAEREIVR-LCYVALDFENEMATAASSSSLEK-TTGIVLDSGDGVTHNVPIYEGYALPHAIMR-VAPEEHPTLLTEAPLNPK-YPIEHGIITNWDDMEK	25;24;22;22	9;9;8;7	9;9;8;7	>sp|P68033|ACTC_MOUSE Actin, alpha cardiac muscle 1 OS=Mus musculus GN=Actc1 PE=1 SV=1;>sp|P62737|ACTA_MOUSE Actin, aortic smooth muscle OS=Mus musculus GN=Acta2 PE=1 SV=1;>sp|P63268|ACTH_MOUSE Actin, gamma-enteric smooth muscle OS=Mus musculus GN=Actg2 PE	4	25	9	9	71.1	36.1	36.1	42.019	377	323.31	69.8	61.8	46.2	57.6	63.7	56.2	49.6	63.7	62.1	68.2	65.3	63.7	55.2	53.8	45.1	60.2	37.9	61	49.6	70.8	49.9	66.3	54.9	52.8				P68033	54036698	11464	Actc1	P68033
146	Actin, cytoplasmic 2 OS=Mus musculus GN=Actg1 PE=1 SV=1; Actin, cytoplasmic 1 OS=Mus musculus GN=Actb PE=1 SV=1	Actin, cytoplasmic 2 OS=Mus musculus GN=Actg1 PE=1 SV=1; Actin, cytoplasmic 1 OS=Mus musculus GN=Actb PE=1 SV=1	IWHHTFYNELR-YSVWIGGSILASLSTFQQMWISK-AGFAGDDAPR-AVFPSIVGRPR-DLTDYLMK-DSYVGDEAQSK-DSYVGDEAQSKR-EITALAPSTMK-HQGVMVGMGQK-HQGVMVGMGQKDSYVGDEAQSK-IIAPPER-IIAPPERK-IKIIAPPER-LDLAGRDLTDYLMK-MQKEITALAPSTMK-SYELPDGQVITIGNER-CPEALFQPSFLGMESCGIHETTFNSIMK-DLYANTVLSGGTTMYPGIADR-EKLCYVALDFEQEMATAASSSSLEK-FRCPEALFQPSFLGMESCGIHETTFNSIMK-GYSFTTTAER-GYSFTTTAEREIVR-KDLYANTVLSGGTTMYPGIADR-LCYVALDFEQEMATAASSSSLEK-MTQI…	31;31	31;31	14;14	>sp|P63260|ACTG_MOUSE Actin, cytoplasmic 2 OS=Mus musculus GN=Actg1 PE=1 SV=1;>sp|P60710|ACTB_MOUSE Actin, cytoplasmic 1 OS=Mus musculus GN=Actb PE=1 SV=1	2	31	31	14	88.8	88.8	45.6	41.792	375	323.31	83.5	70.4	71.2	68.5	81.6	72.5	74.7	69.1	67.7	74.4	76.3	69.9	79.2	65.9	63.5	73.6	53.9	79.5	62.4	83.5	55.2	83.5	83.5	72.5				P63260	54036677	11465	Actg1	P63260
147	Actin-binding LIM protein 1 OS=Mus musculus GN=Ablim1 PE=1 SV=1	Actin-binding LIM protein 1 OS=Mus musculus GN=Ablim1 PE=1 SV=1	AIYDIERPDLITYEPFYTSGYEDKQER-TLSPTPSAEGYQDVR	2	2	2	>sp|Q8K4G5|ABLM1_MOUSE Actin-binding LIM protein 1 OS=Mus musculus GN=Ablim1 PE=1 SV=1	1	2	2	2	4.9	4.9	4.9	96.804	861	5.1767	0	0	0	0	0	0	0	0	0	0	4.9	0	0	0	0	0	0	0	0	0	0	0	0	0				Q8K4G5	56404616	226251	Ablim1	Q8K4G5
148	Actin-like protein 6A OS=Mus musculus GN=Actl6a PE=1 SV=2	Actin-like protein 6A OS=Mus musculus GN=Actl6a PE=1 SV=2	EGSPANWK-ENMEAISPLK-LIANNTTVER-LKIPEGLFDPSNVK-QGGPTYYIDTNALR-SEASLHPVLMSEAPWNTR-STGLILDSGATHTTAIPVHDGYVLQQGIVK-VDFPTAIGVVLER	8	8	8	>sp|Q9Z2N8|ACL6A_MOUSE Actin-like protein 6A OS=Mus musculus GN=Actl6a PE=1 SV=2	1	8	8	8	27.3	27.3	27.3	47.447	429	26.764	20	8.6	15.6	15.6	17.9	12.4	17.5	15.6	17.5	8.9	19.8	15.6	9.3	2.3	11.2	12.6	0	11.9	15.6	13.3	13.3	8.9	12.4	10			82;122	Q9Z2N8	23396474	56456	Actl6a	Q9Z2N8
149	Actin-related protein 10 OS=Mus musculus GN=Actr10 PE=1 SV=2	Actin-related protein 10 OS=Mus musculus GN=Actr10 PE=1 SV=2	ESLVLPIYEGIPILNCWGALPLGGK-FNIDGNNERPTPPPNVDYPLDGEK	2	2	2	>sp|Q9QZB7|ARP10_MOUSE Actin-related protein 10 OS=Mus musculus GN=Actr10 PE=1 SV=2	1	2	2	2	11.8	11.8	11.8	46.207	417	4.003	0	5.8	0	5.8	0	0	5.8	5.8	5.8	5.8	0	0	0	0	0	0	0	0	5.8	6	0	5.8	0	0		160		Q9QZB7	341940243	56444	Actr10	Q9QZB7
150	Actin-related protein 2 OS=Mus musculus GN=Actr2 PE=1 SV=1	Actin-related protein 2 OS=Mus musculus GN=Actr2 PE=1 SV=1	CGYAGSNFPEHIFPALVGRPIIR-DLMVGDEASELR-EKLCYVGYNIEQEQK-FEAPEALFQPHLINVEGVGVAELLFNTIQAADIDTR-GYAFNHSADFETVR-HIVLSGGSTMYPGLPSR-HLWDYTFGPEK-ILLTEPPMNPTK-KVVVCDNGTGFVK-LALETTVLVESYTLPDGR-LCYVGYNIEQEQK-SMLEVNYPMENGIVR-VGNIEIK-VGNIEIKDLMVGDEASELR-VVVCDNGTGFVK	15	15	15	>sp|P61161|ARP2_MOUSE Actin-related protein 2 OS=Mus musculus GN=Actr2 PE=1 SV=1	1	15	15	15	49	49	49	44.76	394	323.31	32.5	39.3	26.1	36.5	39.8	36	34.8	35.5	39.3	29.4	34	29.7	18.8	21.6	28.7	32.2	0	33.2	22.1	45.7	21.1	35.5	35.5	17.8		11;20;221	56;67;74;114;309	P61161	47117649	66713	Actr2	P61161
151	Actin-related protein 2/3 complex subunit 1A OS=Mus musculus GN=Arpc1a PE=1 SV=1	Actin-related protein 2/3 complex subunit 1A OS=Mus musculus GN=Arpc1a PE=1 SV=1	DGIWKPTLVILR-LAWVSHDSTVSVADASK-LDVPKQSIQR-SVQVSTLR-TLESSIQGLR-VFSAYIK	7	6	6	>sp|Q9R0Q6|ARC1A_MOUSE Actin-related protein 2/3 complex subunit 1A OS=Mus musculus GN=Arpc1a PE=1 SV=1	1	7	6	6	23.5	17.3	17.3	41.626	370	105.02	16.2	20.8	18.9	10	16.2	20.8	11.4	20.8	18.1	13.5	18.6	20.8	0	6.2	16.2	14.3	6.2	10.5	14.6	16.2	0	10	20.8	9.5		162		Q9R0Q6	59797974	56443	Arpc1a	Q9R0Q6
152	Actin-related protein 2/3 complex subunit 1B OS=Mus musculus GN=Arpc1b PE=2 SV=4	Actin-related protein 2/3 complex subunit 1B OS=Mus musculus GN=Arpc1b PE=2 SV=4	ASSEGGAATGAGLDSLHK-EHNGQVTGIDWAPESNR-EVEERPAPTPWGSK-FAVGSGSR-IFSAYIK-NAYVWTLK-NSVSQISVLSGGK-SLESALK-TQIAICPNNHEVHIYEK-TWKPTLVILR-WAPNENK-WAPNENKFAVGSGSR-STVLSLDWHPNNVLLAAGSCDFK	13	13	12	>sp|Q9WV32|ARC1B_MOUSE Actin-related protein 2/3 complex subunit 1B OS=Mus musculus GN=Arpc1b PE=2 SV=4	1	13	13	12	40.1	40.1	33.9	41.063	372	312.69	33.3	31.7	35.5	27.4	40.1	33.6	29.3	35.5	33.6	33.6	35.5	35.5	29.3	31.7	33.6	29.6	31.5	25.5	29.3	33.6	27.4	29.3	35.5	24.7		26;162		Q9WV32	341940630	11867	Arpc1b	Q9WV32
153	Actin-related protein 2/3 complex subunit 2 OS=Mus musculus GN=Arpc2 PE=1 SV=3	Actin-related protein 2/3 complex subunit 2 OS=Mus musculus GN=Arpc2 PE=1 SV=3	ASHTAPQVLFSHR-DDETMYVESK-DNTINLIHTFR-DTDAAVGDNIGYITFVLFPR-ELQAHGADELLK-ELQAHGADELLKR-EPPLELK-EPPLELKDTDAAVGDNIGYITFVLFPR-FENAAAGNKPEAVEVTFADFDGVLYHISNPNGDK-FENAAAGNKPEAVEVTFADFDGVLYHISNPNGDKTK-IIEETLALK-MILLEVNNR-NCFASVFEK-RVYGSFLVNPEPGYNVSLLYDLENLPASK-VFMQEFK-VMVSISLK-VYGSFLVNPEPGYNVSLLYDLENLPASK-YFQFQEEGK-YFQFQEEGKEGENR	19	19	19	>sp|Q9CVB6|ARPC2_MOUSE Actin-related protein 2/3 complex subunit 2 OS=Mus musculus GN=Arpc2 PE=1 SV=3	1	19	19	19	64.7	64.7	64.7	34.357	300	323.31	55.3	36.7	45	53.3	42.3	42.7	14.7	45.3	58	54.3	57.7	52	38.3	24	43	52	36.3	47	25	50.7	52.3	37.3	56.7	44		120	1;56;152;182	Q9CVB6	110825706	76709	Arpc2	Q9CVB6
154	Actin-related protein 2/3 complex subunit 3 OS=Mus musculus GN=Arpc3 PE=1 SV=3	Actin-related protein 2/3 complex subunit 3 OS=Mus musculus GN=Arpc3 PE=1 SV=3	AYLQQLR-DTDIVDEAIYYFK-ETKDTDIVDEAIYYFK-LIGNMALLPLR-NYEIKNEADR-PAYHSSLMDPDTK-VFDPQSDKPSK-WWTCFVK	8	8	8	>sp|Q9JM76|ARPC3_MOUSE Actin-related protein 2/3 complex subunit 3 OS=Mus musculus GN=Arpc3 PE=1 SV=3	1	8	8	8	42.1	42.1	42.1	20.524	178	144.44	34.8	25.3	25.3	32.6	27.5	34.8	25.3	38.2	42.1	36.5	23.6	32.6	34.8	25.3	30.9	27.5	27.5	25.3	42.1	42.1	32.6	30.3	25.3	25.3		162	9;19	Q9JM76	62899893	56378	Arpc3	Q9JM76
155	Actin-related protein 2/3 complex subunit 4 OS=Mus musculus GN=Arpc4 PE=1 SV=3	Actin-related protein 2/3 complex subunit 4 OS=Mus musculus GN=Arpc4 PE=1 SV=3	AENFFILR-ATLQAALCLENFSSQVVER-EKVLIEGSINSVR-ELLLQPVTISR-IVAEEFLK-KPVEGYDISFLITNFHTEQMYK-SSKELLLQPVTISR-VLIEGSINSVR	8	8	8	>sp|P59999|ARPC4_MOUSE Actin-related protein 2/3 complex subunit 4 OS=Mus musculus GN=Arpc4 PE=1 SV=3	1	8	8	8	50	50	50	19.667	168	191.91	23.8	25.6	33.9	22.6	22.6	23.8	36.9	35.1	24.4	22.6	22.6	19.6	17.9	36.9	23.8	47	22.6	38.7	35.1	50	33.9	33.9	35.7	35.7		21	126	P59999	38372626	68089	Arpc4	P59999
156	Actin-related protein 2/3 complex subunit 5 OS=Mus musculus GN=Arpc5 PE=2 SV=3	Actin-related protein 2/3 complex subunit 5 OS=Mus musculus GN=Arpc5 PE=2 SV=3	ALAAGGVGSIVR-AVQSLDKNGVDLLMK-GFESPSDNSSAVLLQWHEK-NGVDLLMK-QGNMTAALQAALK	5	5	5	>sp|Q9CPW4|ARPC5_MOUSE Actin-related protein 2/3 complex subunit 5 OS=Mus musculus GN=Arpc5 PE=2 SV=3	1	5	5	5	39.1	39.1	39.1	16.288	151	213.99	29.1	29.1	29.1	39.1	30.5	39.1	31.1	29.1	39.1	39.1	34.4	39.1	29.1	30.5	39.1	39.1	39.1	29.1	29.1	39.1	39.1	16.6	39.1	29.1			51;107	Q9CPW4	62510460	67771	Arpc5	Q9CPW4
157	Actin-related protein 2/3 complex subunit 5-like protein OS=Mus musculus GN=Arpc5l PE=1 SV=1	Actin-related protein 2/3 complex subunit 5-like protein OS=Mus musculus GN=Arpc5l PE=1 SV=1	ALAVGGLGSIIR-GFEKPTENSSAVLLQWHEK-SSEIEQAVQSLDR	3	3	3	>sp|Q9D898|ARP5L_MOUSE Actin-related protein 2/3 complex subunit 5-like protein OS=Mus musculus GN=Arpc5l PE=1 SV=1	1	3	3	3	28.8	28.8	28.8	16.98	153	57.199	16.3	16.3	16.3	20.3	16.3	16.3	16.3	16.3	28.8	16.3	7.8	16.3	16.3	7.8	16.3	20.3	16.3	16.3	16.3	28.8	16.3	7.8	16.3	16.3				Q9D898	81881592	74192	Arpc5l	Q9D898
158	Actin-related protein 3 OS=Mus musculus GN=Actr3 PE=1 SV=3; Actin-related protein 3B OS=Mus musculus GN=Actr3b PE=2 SV=1	Actin-related protein 3 OS=Mus musculus GN=Actr3 PE=1 SV=3	AEPEDHYFLLTEPPLNTPENR-DREVGIPPEQSLETAK-DYEEIGPSICR-EFNKYDTDGSK-EFSIDVGYER-FMEQVIFK-GVDDLDFFIGDEAIEKPTYATK-KDYEEIGPSICR-LGYAGNTEPQFIIPSCIAIK-LKLSEELSGGR-LPACVVDCGTGYTK-LSEELSGGR-NIVLSGGSTMFR-QYTGVNAISK-QYTGVNAISKK-TLTGTVIDSGDGVTHVIPVAEGYVIGSCIK-YAVWFGGSMLASTPEFYQVCHTK-YLRAEPEDHYFLLTEPPLNTPENR-YSYVCPDLVK-DITYFIQQLLR-EVGIPPEQSLETAK-HGIVEDWDLMER-HNPVFGVMS	23;4	23;4	23;4	>sp|Q99JY9|ARP3_MOUSE Actin-related protein 3 OS=Mus musculus GN=Actr3 PE=1 SV=3	2	23	23	23	63.6	63.6	63.6	47.357	418	323.31	54.8	34	47.1	54.3	54.5	47.6	51.4	55	44.3	48.3	60	54.5	35.6	33	56.7	46.9	16.3	40	52.4	46.4	33	48.3	52.2	52.2		8;12;34;189;235;394;408	89;93;327;383;417	Q99JY9	47116573	74117	Actr3	Q99JY9
159	Activated RNA polymerase II transcriptional coactivator p15 OS=Mus musculus GN=Sub1 PE=1 SV=3	Activated RNA polymerase II transcriptional coactivator p15 OS=Mus musculus GN=Sub1 PE=1 SV=3	DDNMFQIGK-EQISDIDDAVR-EQISDIDDAVRK-GISLNMEQWSQLK	4	4	4	>sp|P11031|TCP4_MOUSE Activated RNA polymerase II transcriptional coactivator p15 OS=Mus musculus GN=Sub1 PE=1 SV=3	1	4	4	4	26.8	26.8	26.8	14.427	127	67.954	26.8	26.8	0	26	8.7	15.7	26	26.8	26.8	8.7	8.7	26	8.7	0	18.9	9.4	8.7	16.5	18.9	26.8	26.8	8.7	17.3	9.4			63;107	P11031	129392	20024	Sub1	P11031
160	Activator of 90 kDa heat shock protein ATPase homolog 1 OS=Mus musculus GN=Ahsa1 PE=2 SV=2	Activator of 90 kDa heat shock protein ATPase homolog 1 OS=Mus musculus GN=Ahsa1 PE=2 SV=2	ADATNVNNWHWTER-DASNWSTEK-EAVGIYISTLK-ETFLTSPEELYR-FHMVDGNVTGEFTDLVPEK-GIPAPEEER-LDGEASINNR-LNWTGTSK-QTFGYGAR-TLFLAVR-VFTTQELVQAFTHAPAALEADR-VFTTQELVQAFTHAPAALEADRGGK-YYFEGIK	13	13	13	>sp|Q8BK64|AHSA1_MOUSE Activator of 90 kDa heat shock protein ATPase homolog 1 OS=Mus musculus GN=Ahsa1 PE=2 SV=2	1	13	13	13	41.1	41.1	41.1	38.117	338	66.561	24.9	26.9	25.1	27.8	29.3	20.4	25.4	27.2	23.4	23.4	25.4	29	12.1	15.4	13.3	31.1	0	22.2	20.4	25.1	8	19.8	31.1	21				Q8BK64	30315914	217737	Ahsa1	Q8BK64
161	Active breakpoint cluster region-related protein OS=Mus musculus GN=Abr PE=1 SV=1	Active breakpoint cluster region-related protein OS=Mus musculus GN=Abr PE=1 SV=1	ATATTSQPVLTIQQIETIFYK-SYLFLLSSDYER	2	2	2	>sp|Q5SSL4|ABR_MOUSE Active breakpoint cluster region-related protein OS=Mus musculus GN=Abr PE=1 SV=1	1	2	2	2	3.8	3.8	3.8	97.666	859	4.3537	0	2.4	1.4	1.4	2.4	2.4	3.8	0	2.4	0	2.4	0	0	0	3.8	1.4	0	0	0	0	2.4	0	2.4	1.4				Q5SSL4	81910107	109934	Abr	Q5SSL4
162	Acylamino-acid-releasing enzyme OS=Mus musculus GN=Apeh PE=2 SV=3	Acylamino-acid-releasing enzyme OS=Mus musculus GN=Apeh PE=2 SV=3	AESFFQTK-DVQFAVQQVLQEEHFDAR-EQSVSWVSLEEAEPIPDIHWGIR-GSTGFGQDSILSLPGNVGHQDVK-QFLEVWEK-QGLEYYHALK-QPSLSAACLGPEVTTQYGGLYR-QVLLSEPQEAAALYR-QYLVFHDGDSVVFAGPAGNSVETR-SALYYVDLSGGK-SFNLSALEK-TPVLLMLGQEDR-VGFLPPAGK-VLHPPPDQENVQYADLDFEAILLQPSNSPDK-VTSLVVDIVPR-VVFDSVQR	16	16	16	>sp|Q8R146|APEH_MOUSE Acylamino-acid-releasing enzyme OS=Mus musculus GN=Apeh PE=2 SV=3	1	16	16	16	33.2	33.2	33.2	81.58	732	161.32	26.1	14.3	23.6	20.2	19.3	11.5	24.7	26.8	13.1	17.9	11.2	14.3	11.3	9	16.5	20.6	23.1	18.2	14.5	24.6	18.6	21.2	24.9	21.3		30	670	Q8R146	408360319	235606	Apeh	Q8R146
163	Acylcarnitine hydrolase OS=Mus musculus GN=Ces2c PE=1 SV=1; Pyrethroid hydrolase Ces2e OS=Mus musculus GN=Ces2e PE=1 SV=1; Pyrethroid hydrolase Ces2a OS=Mus musculus GN=Ces2a PE=1 SV=1; Carboxylesterase 5A OS=Mus musculus GN=Ces5a PE=2 SV=1	Acylcarnitine hydrolase OS=Mus musculus GN=Ces2c PE=1 SV=1	AGVHTFLGIPFAKPPVGPLR-ENLQAVLK-WVQQNIAHFGGNPDR-FAPPEAPEPWSGVR-YWANFAR	5;2;1;1	5;2;1;1	5;2;1;1	>sp|Q91WG0|EST2C_MOUSE Acylcarnitine hydrolase OS=Mus musculus GN=Ces2c PE=1 SV=1	4	5	5	5	11.4	11.4	11.4	62.469	561	12.804	3.6	2.5	0	1.2	3.6	7.5	3.6	3.6	0	3.6	0	3.6	0	0	0	11.4	11.4	0	6.4	11.4	3.9	3.6	3.6	0				Q91WG0	81916120	234671	Ces2c	Q91WG0
164	Acyl-CoA dehydrogenase family member 10 OS=Mus musculus GN=Acad10 PE=1 SV=1	Acyl-CoA dehydrogenase family member 10 OS=Mus musculus GN=Acad10 PE=1 SV=1	AEGLWNLFLPLETDPEKK-GGLVISPEGLSPAVR-TAFGKPLVEQGTILADIAR-WLVPLLEGR	4	4	4	>sp|Q8K370|ACD10_MOUSE Acyl-CoA dehydrogenase family member 10 OS=Mus musculus GN=Acad10 PE=1 SV=1	1	4	4	4	5.7	5.7	5.7	118.98	1069	5.8198	3.2	2.2	0	1.4	1.4	1.4	0	2.2	1.4	0	1.4	1.4	0	0	0	2.2	0	1.4	1.4	3.1	0	0	0	0				Q8K370	81901061	71985	Acad10	Q8K370
165	Acyl-CoA dehydrogenase family member 9, mitochondrial OS=Mus musculus GN=Acad9 PE=1 SV=2	Acyl-CoA dehydrogenase family member 9, mitochondrial OS=Mus musculus GN=Acad9 PE=1 SV=2	ELFLGNIEQK-GIILVGNEEQK-GVFPFPEVSQHELSEINQFVGPLEK-ILLIFEGTNEILR-LFIALTGLQHAGR-NIVEEQLVLKR-NLSEFGLIQEK-SLGLFGIQVPEEYGGLGLSNTMYAR-TVETLLLR-VPVENVLGEVGGGFK-VWITNGGLANIFTVFAK-YFILNGSK	12	12	12	>sp|Q8JZN5|ACAD9_MOUSE Acyl-CoA dehydrogenase family member 9, mitochondrial OS=Mus musculus GN=Acad9 PE=1 SV=2	1	12	12	12	26.7	26.7	26.7	68.721	625	18.413	12.2	6.7	6.6	4.8	7	19.4	17.9	12.3	13.3	13.6	1.3	11	7	0	3.8	8.8	17	2.4	12	14.4	5.8	10.2	17.9	12.3				Q8JZN5	341940170	229211	Acad9	Q8JZN5
166	Acyl-CoA synthetase family member 2, mitochondrial OS=Mus musculus GN=Acsf2 PE=1 SV=1	Acyl-CoA synthetase family member 2, mitochondrial OS=Mus musculus GN=Acsf2 PE=1 SV=1	AASGLLSIGLR-EQNLAQLR-FLSCYDPINIQFTSGTTGNPK-GGVIAGSPAPPELIR-HPQVQEAQVVGVKDER-IMPHTEAQIVNVETGELTNLNVPGELYIR-QVCPELEK-SGETTTAEEIK-TQQYYDILK-YIVFVEGYPLTISGK	10	10	10	>sp|Q8VCW8|ACSF2_MOUSE Acyl-CoA synthetase family member 2, mitochondrial OS=Mus musculus GN=Acsf2 PE=1 SV=1	1	10	10	10	23.3	23.3	23.3	67.95	615	60.366	14	8	8	11.4	12.7	17.4	12.7	11.4	11.4	11.4	7.6	12.7	10.1	2.4	6.7	12.7	11.4	6.7	8	16.1	11.4	17.9	16.1	17.4		194;254		Q8VCW8	81901906	264895	Acsf2	Q8VCW8
167	Acyl-CoA-binding protein OS=Mus musculus GN=Dbi PE=1 SV=2	Acyl-CoA-binding protein OS=Mus musculus GN=Dbi PE=1 SV=2	QATVGDVNTDRPGLLDLK-TQPTDEEMLFIYSHFK	2	2	2	>sp|P31786|ACBP_MOUSE Acyl-CoA-binding protein OS=Mus musculus GN=Dbi PE=1 SV=2	1	2	2	2	39.1	39.1	39.1	10	87	92.296	39.1	0	20.7	39.1	20.7	20.7	39.1	0	20.7	20.7	20.7	20.7	20.7	20.7	20.7	20.7	39.1	20.7	20.7	39.1	20.7	20.7	20.7	39.1				P31786	398990	13167	Dbi	P31786
168	Acyl-coenzyme A thioesterase 13 OS=Mus musculus GN=Acot13 PE=1 SV=1	Acyl-coenzyme A thioesterase 13 OS=Mus musculus GN=Acot13 PE=1 SV=1	TLAFASVDLTNK-VTLVSAAPEK	2	2	2	>sp|Q9CQR4|ACO13_MOUSE Acyl-coenzyme A thioesterase 13 OS=Mus musculus GN=Acot13 PE=1 SV=1	1	2	2	2	15.7	15.7	15.7	15.183	140	6.2187	15.7	7.1	0	7.1	7.1	7.1	7.1	7.1	7.1	0	0	7.1	7.1	0	7.1	7.1	7.1	7.1	7.1	7.1	7.1	0	0	7.1				Q9CQR4	23396819	66834	Acot13	Q9CQR4
169	Acyl-coenzyme A thioesterase 2, mitochondrial OS=Mus musculus GN=Acot2 PE=1 SV=2; Acyl-coenzyme A thioesterase 1 OS=Mus musculus GN=Acot1 PE=1 SV=1; Acyl-coenzyme A thioesterase 6 OS=Mus musculus GN=Acot6 PE=1 SV=1; Acyl-coenzyme A thioesterase 4 OS=Mus musculus GN=Acot4 PE=1 SV=1; Acyl-coenzyme A thioesterase 5 OS=Mus musculus GN=Acot5 PE=2 SV=2; Acyl-coenzyme A thioesterase 3 OS=Mus musculus GN…	Acyl-coenzyme A thioesterase 2, mitochondrial OS=Mus musculus GN=Acot2 PE=1 SV=2; Acyl-coenzyme A thioesterase 1 OS=Mus musculus GN=Acot1 PE=1 SV=1	AHAVAQVDAWQQLQTFFHK-DGLLDVVEALQSPLVDKK-DVQTPFLVELEVLDGHEPDGGQR-GPGIGLLGISK-SDTTFLFLVGQDDHNWK-SFIPVER-GLAPEQPVTLR-SCWDEPLSIAVR	8;5;2;2;1;1	8;5;2;2;1;1	8;5;2;2;1;1	>sp|Q9QYR9|ACOT2_MOUSE Acyl-coenzyme A thioesterase 2, mitochondrial OS=Mus musculus GN=Acot2 PE=1 SV=2;>sp|O55137|ACOT1_MOUSE Acyl-coenzyme A thioesterase 1 OS=Mus musculus GN=Acot1 PE=1 SV=1	6	8	8	8	26	26	26	49.656	453	49.83	24.5	15.5	15.7	8.8	20.8	18.3	10.4	11.5	13.9	13	7.9	13	11.5	8.8	10.6	13.9	2.4	18.1	9.1	11.5	8.8	16.6	15.7	4.9		55		Q9QYR9	341940178	171210	Acot2	Q9QYR9
170	Acyl-coenzyme A thioesterase 9, mitochondrial OS=Mus musculus GN=Acot9 PE=1 SV=1; Acyl-coenzyme A thioesterase 10, mitochondrial OS=Mus musculus GN=Acot10 PE=2 SV=1	Acyl-coenzyme A thioesterase 9, mitochondrial OS=Mus musculus GN=Acot9 PE=1 SV=1; Acyl-coenzyme A thioesterase 10, mitochondrial OS=Mus musculus GN=Acot10 PE=2 SV=1	EIVGVSTVWR-NIIHELFLTTLDPK-DSYIEVLLPLGTDPELR-DSYIEVLLPLGTDPELRDK-EVPLIFPK-IAFSTSSLLK	6;4	6;4	6;4	>sp|Q9R0X4|ACOT9_MOUSE Acyl-coenzyme A thioesterase 9, mitochondrial OS=Mus musculus GN=Acot9 PE=1 SV=1;>sp|Q32MW3|ACO10_MOUSE Acyl-coenzyme A thioesterase 10, mitochondrial OS=Mus musculus GN=Acot10 PE=2 SV=1	2	6	6	6	13.9	13.9	13.9	50.56	439	27.091	13.9	11.2	7.3	11.2	13.4	11.2	13.9	8.9	11.2	11.2	13.4	11.2	7.3	5	9.3	8.9	0	13.4	7.3	9.3	7.3	11.2	11.2	11.2				Q9R0X4	12643842	56360	Acot9	Q9R0X4
171	Acylglycerol kinase, mitochondrial OS=Mus musculus GN=Agk PE=1 SV=1	Acylglycerol kinase, mitochondrial OS=Mus musculus GN=Agk PE=1 SV=1	IPIGFIPLGQTSSLSHTLFAESGNK-LASFWAQPQDASSR	2	2	2	>sp|Q9ESW4|AGK_MOUSE Acylglycerol kinase, mitochondrial OS=Mus musculus GN=Agk PE=1 SV=1	1	2	2	2	9.3	9.3	9.3	46.975	421	3.3184	9.3	0	0	0	5.9	0	0	0	0	5.9	9.3	5.9	0	0	0	0	0	0	0	0	0	5.9	5.9	0				Q9ESW4	81906333	69923	Agk	Q9ESW4
172	Acylphosphatase-1 OS=Mus musculus GN=Acyp1 PE=2 SV=2	Acylphosphatase-1 OS=Mus musculus GN=Acyp1 PE=2 SV=2	GTVQGQLQGPVSK-KLGLVGWVQNTDR-LGLVGWVQNTDR-VIANLDYSDFQIVK	4	4	4	>sp|P56376|ACYP1_MOUSE Acylphosphatase-1 OS=Mus musculus GN=Acyp1 PE=2 SV=2	1	4	4	4	40.4	40.4	40.4	11.241	99	7.8563	40.4	26.3	26.3	39.4	40.4	13.1	26.3	13.1	39.4	40.4	40.4	40.4	13.1	40.4	13.1	12.1	27.3	12.1	39.4	40.4	40.4	40.4	26.3	26.3				P56376	3023246	66204	Acyp1	P56376
173	Acyl-protein thioesterase 1 OS=Mus musculus GN=Lypla1 PE=1 SV=1	Acyl-protein thioesterase 1 OS=Mus musculus GN=Lypla1 PE=1 SV=1	ALIDQEVK-ALINPANVTFK-ASFSQGPINSANR-IILGGFSQGGALSLYTALTTQQK-LAGVTALSCWLPLR	5	5	5	>sp|P97823|LYPA1_MOUSE Acyl-protein thioesterase 1 OS=Mus musculus GN=Lypla1 PE=1 SV=1	1	5	5	5	30	30	30	24.687	230	63.556	30	13.9	13.9	25.2	13.9	15.2	0	13.9	25.2	20	13.9	20	13.9	5.7	3.5	19.1	20	30	20	30	10.4	13.9	10.4	20		144		P97823	41017296	18777	Lypla1	P97823
174	Acyl-protein thioesterase 2 OS=Mus musculus GN=Lypla2 PE=1 SV=1	Acyl-protein thioesterase 2 OS=Mus musculus GN=Lypla2 PE=1 SV=1	DLAILQCHGELDPMVPVR-FGALTAEK-IPVTLNMK-NFPQAANGSAK	4	4	4	>sp|Q9WTL7|LYPA2_MOUSE Acyl-protein thioesterase 2 OS=Mus musculus GN=Lypla2 PE=1 SV=1	1	4	4	4	19.5	19.5	19.5	24.794	231	11.855	8.2	8.2	6.9	16	8.2	8.2	4.8	8.2	14.7	3.5	3.5	14.7	3.5	3.5	3.5	0	11.3	3.5	12.6	14.7	6.9	11.3	11.3	11.3		171	68;178	Q9WTL7	41017420	26394	Lypla2	Q9WTL7
176	Adapter molecule crk OS=Mus musculus GN=Crk PE=1 SV=1	Adapter molecule crk OS=Mus musculus GN=Crk PE=1 SV=1	DSSTSPGDYVLSVSENSR-IGDQEFDSLPALLEFYK-IHYLDTTTLIEPVAR-QEAVALLQGQR-TALALEVGELVK-VSHYIINSSGPRPPVPPSPAQPPPGVSPSR	6	6	6	>sp|Q64010|CRK_MOUSE Adapter molecule crk OS=Mus musculus GN=Crk PE=1 SV=1	1	6	6	6	33.9	33.9	33.9	33.814	304	23.862	25	33.9	28.3	14.5	30.3	24	20.7	33.9	28	14.1	25	28	9.9	0	8.9	13.2	0	20.1	20.7	33.9	24	10.5	33.9	9.2				Q64010	2842663	12928	Crk	Q64010
177	Adaptin ear-binding coat-associated protein 2 OS=Mus musculus GN=Necap2 PE=1 SV=1	Adaptin ear-binding coat-associated protein 2 OS=Mus musculus GN=Necap2 PE=1 SV=1	AFIGLGFGDR-ARPTSAGGLSLLPPPPGGK-ASEWQLDQPSWSGR-QAQNPDEGPKLDLGFK-STGSPSSQSQPGTGWVQF-TSGELFAQAPVDQFPGTAVESVTDSSR	6	6	6	>sp|Q9D1J1|NECP2_MOUSE Adaptin ear-binding coat-associated protein 2 OS=Mus musculus GN=Necap2 PE=1 SV=1	1	6	6	6	39.1	39.1	39.1	28.598	266	81.561	27.8	22.6	33.1	17.3	22.6	19.2	22.6	26.3	15.4	26.3	29.3	29.3	17.3	21.1	27.8	33.1	25.9	12.4	24.1	39.1	22.6	33.1	22.6	10.9				Q9D1J1	62287164	66147	Necap2	Q9D1J1
178	Adenine phosphoribosyltransferase OS=Mus musculus GN=Aprt PE=1 SV=2	Adenine phosphoribosyltransferase OS=Mus musculus GN=Aprt PE=1 SV=2	AELEIQKDALEPGQR-DISPLLKDPDSFR-GFLFGPSLAQELGVGCVLIR-IDYIAGLDSR-LGPIPFFSLLQYD-SFPDFPIPGVLFR	6	6	6	>sp|P08030|APT_MOUSE Adenine phosphoribosyltransferase OS=Mus musculus GN=Aprt PE=1 SV=2	1	6	6	6	46.7	46.7	46.7	19.724	180	54.699	35.6	13.9	35.6	35.6	12.8	35.6	12.8	35.6	39.4	28.3	35.6	28.3	21.1	35.6	28.3	35.6	12.8	35.6	28.3	35.6	35.6	28.3	35.6	35.6		83		P08030	449081285	11821	Aprt	P08030
179	Adenosine deaminase OS=Mus musculus GN=Ada PE=1 SV=3	Adenosine deaminase OS=Mus musculus GN=Ada PE=1 SV=3	ANYSLNTDDPLIFK-EGVVYVEVR-GIALPADTVEELR-HQPSWSLEVLELCK-TVHAGEVGSPEVVR-VDPMPWNQTEGDVTPDDVVDLVNQGLQEGEQAFGIK	6	6	6	>sp|P03958|ADA_MOUSE Adenosine deaminase OS=Mus musculus GN=Ada PE=1 SV=3	1	6	6	6	28.4	28.4	28.4	39.991	352	34.21	14.2	11.6	11.6	11.6	11.6	11.6	15.6	11.6	7.7	11.6	11.6	11.6	18.2	7.7	11.6	11.6	0	10.2	11.6	28.4	7.7	15.6	15.6	7.7		169		P03958	113340	11486	Ada	P03958
180	Adenosine kinase OS=Mus musculus GN=Adk PE=1 SV=2	Adenosine kinase OS=Mus musculus GN=Adk PE=1 SV=2	AATFFGCIGIDKFGEILK-AGHYAASVIIR-ELFDELVK-NWVLVEK-SLVANLAAANCYK-TVIFTQGR-VAQWLIQEPHK-VFTLNLSAPFISQFFK-VYYIAGFFLTVSPESVLK	9	9	9	>sp|P55264|ADK_MOUSE Adenosine kinase OS=Mus musculus GN=Adk PE=1 SV=2	1	9	9	9	30.5	30.5	30.5	40.148	361	63.689	15	14.7	1.9	7.5	10	7.5	15.2	12.2	11.6	15.2	13.3	5.3	7.8	3.6	10.2	11.4	0	13.9	7.8	25.2	10.8	8.6	19.4	11.6		105;159		P55264	71153489	11534	Adk	P55264
181	Adenosylhomocysteinase OS=Mus musculus GN=Ahcy PE=1 SV=3	Adenosylhomocysteinase OS=Mus musculus GN=Ahcy PE=1 SV=3	AGIPVFAWK-ATDVMIAGK-DGPLNMILDDGGDLTNLIHTK-ESLIDGIK-ESLIDGIKR-FDNLYGCR-GETDEEYLWCIEQTLHFK-GISEETTTGVHNLYK-IILLAEGR-RIILLAEGR-VADIGLAAWGR-VAVVAGYGDVGK-VIITEIDPINALQAAMEGYEVTTMDEACK-VNIKPQVDR-VPAINVNDSVTK-WLNENAVEK-WSSCNIFSTQDHAAAAIAK-YPQLLSGIR	18	18	18	>sp|P50247|SAHH_MOUSE Adenosylhomocysteinase OS=Mus musculus GN=Ahcy PE=1 SV=3	1	18	18	18	48.1	48.1	48.1	47.688	432	323.31	36.8	25.9	28	33.1	28.5	33.1	37.3	28.2	33.1	28.5	37.3	32.9	27.8	21.8	32.9	37.3	9	28.9	23.8	37.5	21.8	26.4	39.1	32.4		79;113;195;266	127;210	P50247	21431841	269378	Ahcy	P50247
182	Adenylate kinase 2, mitochondrial OS=Mus musculus GN=Ak2 PE=1 SV=5	Adenylate kinase 2, mitochondrial OS=Mus musculus GN=Ak2 PE=1 SV=5	APNVLASEPEIPK-AVLLGPPGAGK-GIHCAIDASQTPDIVFASILAAFSK-LEAYHTQTTPLVEYYR-LVSDEMVVELIEK-NGFLLDGFPR-NLETPSCK-TRLEAYHTQTTPLVEYYR	8	8	8	>sp|Q9WTP6|KAD2_MOUSE Adenylate kinase 2, mitochondrial OS=Mus musculus GN=Ak2 PE=1 SV=5	1	8	8	8	41	41	41	26.468	239	95.508	21.8	24.3	20.9	35.6	24.3	27.2	3.3	25.1	30.5	23	17.6	30.5	20.9	20.9	20.9	36.8	20.9	27.2	24.3	30.5	24.3	21.8	40.2	30.5		92;208	78	Q9WTP6	224471907	11637	Ak2	Q9WTP6
183	Adenylate kinase isoenzyme 1 OS=Mus musculus GN=Ak1 PE=1 SV=1	Adenylate kinase isoenzyme 1 OS=Mus musculus GN=Ak1 PE=1 SV=1	IIFVVGGPGSGK-LETYYNATEPVISFYDKR-VDSSNGFLIDGYPR-YGYTHLSTGDLLR-YGYTHLSTGDLLRAEVSSGSER	5	5	5	>sp|Q9R0Y5|KAD1_MOUSE Adenylate kinase isoenzyme 1 OS=Mus musculus GN=Ak1 PE=1 SV=1	1	5	5	5	34	34	34	21.539	194	25.134	22.7	6.2	13.4	29.4	12.9	13.4	7.2	20.1	34	29.4	17.5	29.4	20.1	20.1	6.2	22.2	0	12.9	20.1	20.1	15.5	29.4	11.3	13.4				Q9R0Y5	13959400	11636	Ak1	Q9R0Y5
184	Adenylosuccinate lyase OS=Mus musculus GN=Adsl PE=2 SV=2	Adenylosuccinate lyase OS=Mus musculus GN=Adsl PE=2 SV=2	ADAYFSPIHSQLEHLLDPSSFTGR-ADLPTLGFTHFQPAQLTTVGK-AFIITGQTYTR-DRADLPTLGFTHFQPAQLTTVGK-GTTGTQASFLQLFEGDHQK-GTTGTQASFLQLFEGDHQKVEQLDK-HLMALTMDPLQTASVQWFER-KVDIEVLSVLASLGASVHK-NAFDLLLPK-QEGGDNDLIER-VLSQQAAAVVK	11	11	11	>sp|P54822|PUR8_MOUSE Adenylosuccinate lyase OS=Mus musculus GN=Adsl PE=2 SV=2	1	11	11	11	31.6	31.6	31.6	54.866	484	35.259	25.6	22.7	18	26.7	27.7	29.3	31.6	26.7	24.4	15.3	22.3	24.4	18.8	14.9	17.4	20	6.6	12.6	15.9	27.5	15.1	21.5	31.6	22.9				P54822	341941775	11564	Adsl	P54822
185	Adenylosuccinate synthetase isozyme 1 OS=Mus musculus GN=Adssl1 PE=1 SV=2	Adenylosuccinate synthetase isozyme 1 OS=Mus musculus GN=Adssl1 PE=1 SV=2	AHLVFDFHQAVDGLQEVQR-AVSFIGNGVVIHLPGLFEEAEK-EYDFHLLPSGIINTK-ICDLLSDFDEFSAR-IPYFPANQEILQK-LDILDVLSEIK-RIPYFPANQEILQK-VEVEYETLPGWK-VGIGAFPTEQINEIGDLLQNR-VVDLLATDADIVSR	10	10	10	>sp|P28650|PURA1_MOUSE Adenylosuccinate synthetase isozyme 1 OS=Mus musculus GN=Adssl1 PE=1 SV=2	1	10	10	10	31.1	31.1	31.1	50.254	457	33.049	7	3.1	6.1	21.7	14.4	19.9	16.8	20.6	24.7	10.3	19	17.5	8.1	6.3	23.2	28	0	18.8	14.2	31.1	19.7	15.8	23	11.4		183		P28650	1346910	11565	Adssl1	P28650
186	Adenylosuccinate synthetase isozyme 2 OS=Mus musculus GN=Adss PE=1 SV=2	Adenylosuccinate synthetase isozyme 2 OS=Mus musculus GN=Adss PE=1 SV=2	ELPVNAQNYVR-FIEDELQIPVK-GIGPVYSSK-SIYPTLEIDIEGELQQLK-TLPGWNTDISNAR-VGIGAFPTEQDNEIGELLQTR-VVDLLAQDADIVCR	7	7	7	>sp|P46664|PURA2_MOUSE Adenylosuccinate synthetase isozyme 2 OS=Mus musculus GN=Adss PE=1 SV=2	1	7	7	7	21.3	21.3	21.3	50.02	456	19.072	9	7	12.5	9.4	12.1	12.5	10.1	10.1	10.1	12.1	10.1	7	2.4	7.2	7	10.1	0	12.9	7.2	14	5.5	9.9	7	10.1		58		P46664	93139504	11566	Adss	P46664
187	Adenylyl cyclase-associated protein 1 OS=Mus musculus GN=Cap1 PE=1 SV=4; Adenylyl cyclase-associated protein 2 OS=Mus musculus GN=Cap2 PE=1 SV=1	Adenylyl cyclase-associated protein 1 OS=Mus musculus GN=Cap1 PE=1 SV=4	ALLATASQCQQPAGNK-AYLSIWTELQAYIK-CVNTTLQIK-EFHTTGLAWSK-ELSGLPSGPSVGSGPPPPPPGPPPPPISTSSGSDDSASR-EMNDAAMFYTNR-EPALLELEGK-GAVPYVQAFDSLLANPVAEYLK-INSITVDNCK-KEPALLELEGK-LGLVFDDVVGIVEIINSR-LSDLLAPISEQIQEVITFR-LSDLLAPISEQIQEVITFREK-LVTTVTEIAG-NSLDCEIVSAK-QVAYIYK-SALFAQINQGESITHALK-SGPKPFSAPKPQTSPSPKPATK-SSEMNVLIPTEGGDFNEFPVPEQFK-TLWNGQK-VENQENVSNLVIDDTELK-VENQENVSNLVIDDTELKQVAYIYK-WRVENQENVSNLVIDDTELK-V…	24;1	24;1	24;1	>sp|P40124|CAP1_MOUSE Adenylyl cyclase-associated protein 1 OS=Mus musculus GN=Cap1 PE=1 SV=4	2	24	24	24	65.6	65.6	65.6	51.564	474	323.31	57.6	48.1	36.7	57.6	53.8	57.6	52.7	51.3	53.8	55.1	62.2	53.8	43.5	40.1	45.8	57.6	50.4	53.4	49.4	61	51.5	57.6	51.5	57.6		92;355;374;426	156;161;436	P40124	341940637	12331	Cap1	P40124
188	Adipocyte plasma membrane-associated protein OS=Mus musculus GN=Apmap PE=1 SV=1	Adipocyte plasma membrane-associated protein OS=Mus musculus GN=Apmap PE=1 SV=1	IYFTDSSSK-LENGEIETIAR-LFENQLSGPESIVNIGDVLFTGTADGR-LLEYDTVTK-LLLSSETPIEGK-RPLRPQVVTDDGQVPEVK-VVKLENGEIETIAR	7	7	7	>sp|Q9D7N9|APMAP_MOUSE Adipocyte plasma membrane-associated protein OS=Mus musculus GN=Apmap PE=1 SV=1	1	7	7	7	21.4	21.4	21.4	46.434	415	38.412	16.4	16.4	7.7	0	20.7	5.1	5.1	13.5	9.9	5.1	14.2	14.2	2.7	2.2	12	10.8	0	5.1	2.2	16.4	12.8	14.9	20.7	9.9				Q9D7N9	24211473	71881	Apmap	Q9D7N9
189	ADP/ATP translocase 1 OS=Mus musculus GN=Slc25a4 PE=1 SV=4; ADP/ATP translocase 4 OS=Mus musculus GN=Slc25a31 PE=2 SV=1	ADP/ATP translocase 1 OS=Mus musculus GN=Slc25a4 PE=1 SV=4	AAYFGVYDTAK-DEGANAFFK-DFLAGGIAAAVSK-EFNGLGDCLTK-EQGFLSFWR-QIFLGGVDR	14;4	6;0	6;0	>sp|P48962|ADT1_MOUSE ADP/ATP translocase 1 OS=Mus musculus GN=Slc25a4 PE=1 SV=4	2	14	6	6	51.3	20.8	20.8	32.904	298	264.94	47	27.2	23.5	37.9	29.5	45.3	21.5	42.3	48.7	50.7	50.7	41.6	37.9	29.5	33.9	40.9	38.6	31.2	30.2	44	47.7	32.6	38.9	47		129;160	282	P48962	21903382	11739	Slc25a4	P48962
190	ADP/ATP translocase 2 OS=Mus musculus GN=Slc25a5 PE=1 SV=3	ADP/ATP translocase 2 OS=Mus musculus GN=Slc25a5 PE=1 SV=3	GAWSNVLR-GMGGAFVLVLYDEIKK-LLLQVQHASK-YFAGNLASGGAAGATSLCFVYPLDFAR-GNLANVIR-TAVAPIER-YFPTQALNFAFK-YFPTQALNFAFKDK-AAYFGIYDTAK-DFLAGGVAAAISK-EQGVLSFWR-GLGDCLVK-GTDIMYTGTLDCWR-KGTDIMYTGTLDCWR-QIFLGGVDK-QIFLGGVDKR	16	16	8	>sp|P51881|ADT2_MOUSE ADP/ATP translocase 2 OS=Mus musculus GN=Slc25a5 PE=1 SV=3	1	16	16	8	52.7	52.7	22.1	32.931	298	323.31	49.3	31.9	30.2	49	29.9	46.6	32.9	44	50	52	51.7	39.6	40.3	30.5	38.3	50	40.9	40.6	33.2	50	46.6	34.9	40.6	51.7		129;160;257	250;282	P51881	1703188	11740	Slc25a5	P51881
191	ADP-dependent glucokinase OS=Mus musculus GN=Adpgk PE=1 SV=2	ADP-dependent glucokinase OS=Mus musculus GN=Adpgk PE=1 SV=2	APQEFTTSHLESGSR-FAANTDLK-LGPAPVPVGPLSPESR-LLQALGLSPGSGK-SDLEEAFLYFMGK-TVGLGDAISAEGLFYSEARPD-VLLCGPIGPK	7	7	7	>sp|Q8VDL4|ADPGK_MOUSE ADP-dependent glucokinase OS=Mus musculus GN=Adpgk PE=1 SV=2	1	7	7	7	19.4	19.4	19.4	53.902	496	22.093	2.6	5.2	8.9	6.2	5	12.5	12.5	5.2	7.5	10.5	15.1	7.9	5.8	3	3.2	10.5	0	5.2	12.5	8.3	0	5.8	7.5	12.5		178		Q8VDL4	62899880	72141	Adpgk	Q8VDL4
192	ADP-ribosyl cyclase/cyclic ADP-ribose hydrolase 1 OS=Mus musculus GN=Cd38 PE=1 SV=2	ADP-ribosyl cyclase/cyclic ADP-ribose hydrolase 1 OS=Mus musculus GN=Cd38 PE=1 SV=2	DQNCQEILSTFK-EDYAPLVK-HFSDIFLGR-MFTLEDTLLGYIADDLR-SLLVWTGEPTTK	5	5	5	>sp|P56528|CD38_MOUSE ADP-ribosyl cyclase/cyclic ADP-ribose hydrolase 1 OS=Mus musculus GN=Cd38 PE=1 SV=2	1	5	5	5	19.1	19.1	19.1	34.407	304	56.286	13.5	13.5	6.9	12.5	13.5	6.9	16.1	7.9	10.9	7.9	13.5	6.6	10.5	0	12.2	16.4	0	6.6	10.5	16.4	10.5	10.5	9.5	6.6		86	146	P56528	55977806	12494	Cd38	P56528
193	ADP-ribosyl cyclase/cyclic ADP-ribose hydrolase 2 OS=Mus musculus GN=Bst1 PE=1 SV=1	ADP-ribosyl cyclase/cyclic ADP-ribose hydrolase 2 OS=Mus musculus GN=Bst1 PE=1 SV=1	GFFADFEIPYLQK-VGDFLSWCR	2	2	2	>sp|Q64277|BST1_MOUSE ADP-ribosyl cyclase/cyclic ADP-ribose hydrolase 2 OS=Mus musculus GN=Bst1 PE=1 SV=1	1	2	2	2	7.1	7.1	7.1	34.616	311	3.4127	7.1	7.1	4.2	7.1	4.2	4.2	7.1	4.2	0	0	2.9	4.2	0	0	7.1	0	0	4.2	2.9	0	0	0	7.1	0		137		Q64277	2493429	12182	Bst1	Q64277
194	ADP-ribosylation factor 3 OS=Mus musculus GN=Arf3 PE=2 SV=2; ADP-ribosylation factor 1 OS=Mus musculus GN=Arf1 PE=1 SV=2	ADP-ribosylation factor 3 OS=Mus musculus GN=Arf3 PE=2 SV=2; ADP-ribosylation factor 1 OS=Mus musculus GN=Arf1 PE=1 SV=2	MLAEDELRDAVLLVFANK-LGLHSLR-MLAEDELR-NISFTVWDVGGQDK-QDLPNAMNAAEITDK-QDLPNAMNAAEITDKLGLHSLR-DAVLLVFANK-HYFQNTQGLIFVVDSNDR-HYFQNTQGLIFVVDSNDRER-ILMVGLDAAGK-LGEIVTTIPTIGFNVETVEYK-LKLGEIVTTIPTIGFNVETVEYK	12;12	12;12	1;1	>sp|P61205|ARF3_MOUSE ADP-ribosylation factor 3 OS=Mus musculus GN=Arf3 PE=2 SV=2;>sp|P84078|ARF1_MOUSE ADP-ribosylation factor 1 OS=Mus musculus GN=Arf1 PE=1 SV=2	2	12	12	1	59.7	59.7	9.9	20.601	181	323.31	58.6	58.6	58.6	55.8	44.2	57.5	58.6	57.5	57.5	47.5	50.3	50.8	35.9	55.8	47.5	59.7	54.7	59.7	59.7	55.2	53.6	46.4	55.8	54.7			22;110;134	P61205	47117658	11842	Arf3	P61205
195	ADP-ribosylation factor 2 OS=Mus musculus GN=Arf2 PE=1 SV=2	ADP-ribosylation factor 2 OS=Mus musculus GN=Arf2 PE=1 SV=2	DAVLLVFVNK	11	1	1	>sp|Q8BSL7|ARF2_MOUSE ADP-ribosylation factor 2 OS=Mus musculus GN=Arf2 PE=1 SV=2	1	11	1	1	59.7	5.5	5.5	20.746	181	323.31	53	53	53	50.3	38.7	53	53	51.9	51.9	37.6	44.8	45.3	30.4	50.3	42	59.7	49.2	54.1	54.1	55.2	48.1	40.9	55.8	49.2			22;110;134	Q8BSL7	51316991	11841	Arf2	Q8BSL7
196	ADP-ribosylation factor 4 OS=Mus musculus GN=Arf4 PE=1 SV=2	ADP-ribosylation factor 4 OS=Mus musculus GN=Arf4 PE=1 SV=2	IQEGAAVLQK-LGLQSLR-MLLEDELQDAVLLLFANK-NICFTVWDVGGQDK	9	4	3	>sp|P61750|ARF4_MOUSE ADP-ribosylation factor 4 OS=Mus musculus GN=Arf4 PE=1 SV=2	1	9	4	3	57.2	27.2	19.4	20.396	180	323.31	38.3	46.1	38.3	47.2	32.2	37.2	42.2	45	37.2	47.2	42.2	38.3	36.1	47.2	27.2	57.2	46.1	47.2	47.2	47.2	37.2	42.2	47.2	38.3		62	22;110	P61750	48428790	11843	Arf4	P61750
197	ADP-ribosylation factor 5 OS=Mus musculus GN=Arf5 PE=1 SV=2	ADP-ribosylation factor 5 OS=Mus musculus GN=Arf5 PE=1 SV=2	VQESADELQK	8	1	1	>sp|P84084|ARF5_MOUSE ADP-ribosylation factor 5 OS=Mus musculus GN=Arf5 PE=1 SV=2	1	8	1	1	48.9	5.6	5.6	20.529	180	323.31	40	47.8	40	48.9	33.9	38.9	47.8	46.7	38.9	48.9	47.8	34.4	41.7	48.9	28.9	48.9	47.8	48.9	48.9	48.9	33.3	47.8	48.9	40		62	22	P84084	51316989	11844	Arf5	P84084
198	ADP-ribosylation factor 6 OS=Mus musculus GN=Arf6 PE=1 SV=2	ADP-ribosylation factor 6 OS=Mus musculus GN=Arf6 PE=1 SV=2	FNVWDVGGQDK-ILMLGLDAAGK-LGQSVTTIPTVGFNVETVTYK-LKLGQSVTTIPTVGFNVETVTYK-QDLPDAMKPHEIQEK	5	5	5	>sp|P62331|ARF6_MOUSE ADP-ribosylation factor 6 OS=Mus musculus GN=Arf6 PE=1 SV=2	1	5	5	5	34.3	34.3	34.3	20.082	175	59.789	33.1	26.9	33.1	28	21.1	25.7	24.6	18.3	12.6	33.1	18.3	24.6	18.3	34.3	33.1	33.1	24.6	25.7	12.6	25.7	26.9	12	19.4	33.1			18;130	P62331	59799156	11845	Arf6	P62331
199	ADP-ribosylation factor GTPase-activating protein 1 OS=Mus musculus GN=Arfgap1 PE=1 SV=2	ADP-ribosylation factor GTPase-activating protein 1 OS=Mus musculus GN=Arfgap1 PE=1 SV=2	DVTTFFSGK-FREFLETQDDYEPSWSLQDK	2	2	2	>sp|Q9EPJ9|ARFG1_MOUSE ADP-ribosylation factor GTPase-activating protein 1 OS=Mus musculus GN=Arfgap1 PE=1 SV=2	1	2	2	2	7	7	7	45.288	414	5.6885	0	0	0	0	0	4.8	0	0	0	0	2.2	4.8	0	0	0	0	0	0	0	4.8	0	0	0	0				Q9EPJ9	51338821	228998	Arfgap1	Q9EPJ9
200	ADP-ribosylation factor-binding protein GGA1 OS=Mus musculus GN=Gga1 PE=1 SV=1	ADP-ribosylation factor-binding protein GGA1 OS=Mus musculus GN=Gga1 PE=1 SV=1	LASDTEDNDEALAEILQANDNLTQVINLYK-LQPPSGTELPAFNPIVHPSAITQVLLLANPQK	3	2	2	>sp|Q8R0H9|GGA1_MOUSE ADP-ribosylation factor-binding protein GGA1 OS=Mus musculus GN=Gga1 PE=1 SV=1	1	3	2	2	10.9	9.8	9.8	69.971	635	12.08	4.7	1.1	0	0	0	1.1	4.7	0	6.1	0	0	0	1.1	1.1	0	4.7	0	0	1.1	9.8	1.1	0	5.8	1.1				Q8R0H9	62286892	106039	Gga1	Q8R0H9
201	ADP-ribosylation factor-binding protein GGA2 OS=Mus musculus GN=Gga2 PE=1 SV=1; ADP-ribosylation factor-binding protein GGA3 OS=Mus musculus GN=Gga3 PE=2 SV=2	ADP-ribosylation factor-binding protein GGA2 OS=Mus musculus GN=Gga2 PE=1 SV=1	LASDTTDDDDALAEILQANDLLTQGVR-NLLDLFSPQPSPGLNYVPQK-VSAGNAVPAAVGAIPAPR-FLNELIK	4;1	4;1	3;0	>sp|Q6P5E6|GGA2_MOUSE ADP-ribosylation factor-binding protein GGA2 OS=Mus musculus GN=Gga2 PE=1 SV=1	2	4	4	3	11.9	11.9	10.8	66.048	603	8.2696	10.8	4.1	0	6.3	10.8	7.5	10.8	3	1.2	0	3	10.8	9	1.2	0	0	0	0	7.5	7.8	1.2	4.5	5.6	7.5				Q6P5E6	62286826	74105	Gga2	Q6P5E6
202	ADP-ribosylation factor-like protein 1 OS=Mus musculus GN=Arl1 PE=2 SV=1	ADP-ribosylation factor-like protein 1 OS=Mus musculus GN=Arl1 PE=2 SV=1	AILVVFANK-ILILGLDGAGK-LQVGEVVTTIPTIGFNVETVTYK	3	3	3	>sp|P61211|ARL1_MOUSE ADP-ribosylation factor-like protein 1 OS=Mus musculus GN=Arl1 PE=2 SV=1	1	3	3	3	23.8	23.8	23.8	20.411	181	13.719	11	11	11	23.8	11	23.8	23.8	11	23.8	11	11	11	11	23.8	11	23.8	11	23.8	11	23.8	23.8	23.8	23.8	11				P61211	47117662	104303	Arl1	P61211
203	ADP-ribosylation factor-like protein 2 OS=Mus musculus GN=Arl2 PE=1 SV=1	ADP-ribosylation factor-like protein 2 OS=Mus musculus GN=Arl2 PE=1 SV=1	ELQSLLVEER-KFNGEDVDTISPTLGFNIK-LAGATLLIFANK-LNIWDVGGQK	4	4	4	>sp|Q9D0J4|ARL2_MOUSE ADP-ribosylation factor-like protein 2 OS=Mus musculus GN=Arl2 PE=1 SV=1	1	4	4	4	27.7	27.7	27.7	20.864	184	4.0819	12	12	0	0	12	22.3	12	5.4	10.9	12	0	10.9	5.4	0	5.4	15.8	12	5.4	5.4	22.3	5.4	0	5.4	5.4				Q9D0J4	22256718	56327	Arl2	Q9D0J4
204	ADP-ribosylation factor-like protein 3 OS=Mus musculus GN=Arl3 PE=1 SV=1	ADP-ribosylation factor-like protein 3 OS=Mus musculus GN=Arl3 PE=1 SV=1	ILLLGLDNAGK-LNVWDIGGQR-QDLLTAAPASEIAEGLNLHTIR-QLASEDISHITPTQGFNIK	4	4	4	>sp|Q9WUL7|ARL3_MOUSE ADP-ribosylation factor-like protein 3 OS=Mus musculus GN=Arl3 PE=1 SV=1	1	4	4	4	34.1	34.1	34.1	20.486	182	20.543	23.6	16.5	34.1	22.5	11.5	18.1	11.5	28.6	34.1	11.5	6	18.1	11.5	34.1	16.5	18.1	16.5	34.1	22	18.1	12.1	23.6	12.1	6				Q9WUL7	9910633	56350	Arl3	Q9WUL7
205	ADP-ribosylation factor-like protein 8A OS=Mus musculus GN=Arl8a PE=2 SV=1	ADP-ribosylation factor-like protein 8A OS=Mus musculus GN=Arl8a PE=2 SV=1	DLAGALDEK-DLAGALDEKELIEK-LWDIGGQPR-EICCYSISCK-MNLSAIQDR-NELHNLLDKPQLQGIPVLVLGNK-NELHNLLDKPQLQGIPVLVLGNKR	7	7	3	>sp|Q8VEH3|ARL8A_MOUSE ADP-ribosylation factor-like protein 8A OS=Mus musculus GN=Arl8a PE=2 SV=1	1	7	7	3	35.5	35.5	12.4	21.39	186	20.049	22.6	17.2	17.2	34.9	14.5	22.6	17.2	22.6	29.6	17.2	17.2	29.6	12.4	12.4	4.8	27.4	22.6	29.6	17.2	29.6	9.7	17.2	17.2	17.2		158;159;164	147	Q8VEH3	81902053	68724	Arl8a	Q8VEH3
206	ADP-ribosylation factor-like protein 8B OS=Mus musculus GN=Arl8b PE=2 SV=1	ADP-ribosylation factor-like protein 8B OS=Mus musculus GN=Arl8b PE=2 SV=1	DLPNALDEK-GVNAIVYMIDAADR	6	2	2	>sp|Q9CQW2|ARL8B_MOUSE ADP-ribosylation factor-like protein 8B OS=Mus musculus GN=Arl8b PE=2 SV=1	1	6	2	2	35.5	12.4	12.4	21.539	186	20.377	22.6	9.7	9.7	27.4	9.7	22.6	9.7	15.1	22	9.7	9.7	22	4.8	4.8	4.8	22.6	15.1	29.6	9.7	29.6	4.8	17.2	24.7	9.7		158;159;164	147	Q9CQW2	81903598	67166	Arl8b	Q9CQW2
207	ADP-sugar pyrophosphatase OS=Mus musculus GN=Nudt5 PE=1 SV=1	ADP-sugar pyrophosphatase OS=Mus musculus GN=Nudt5 PE=1 SV=1	HLVTSEELISEGK-LDALGAEQHLTVDAK-SADAVSVIPVLQR-VYAYGLALK	4	4	4	>sp|Q9JKX6|NUDT5_MOUSE ADP-sugar pyrophosphatase OS=Mus musculus GN=Nudt5 PE=1 SV=1	1	4	4	4	22.9	22.9	22.9	23.984	218	14.207	16.1	4.1	16.1	4.1	16.1	16.1	16.1	10.1	10.1	4.1	10.1	10.1	4.1	4.1	10.1	10.1	4.1	4.1	4.1	22.9	4.1	10.1	4.1	16.1				Q9JKX6	44888250	53893	Nudt5	Q9JKX6
208	AFG3-like protein 2 OS=Mus musculus GN=Afg3l2 PE=1 SV=1	AFG3-like protein 2 OS=Mus musculus GN=Afg3l2 PE=1 SV=1	VALLLLEK-VGQISFDLPR-VSEEIFFGR	3	3	2	>sp|Q8JZQ2|AFG32_MOUSE AFG3-like protein 2 OS=Mus musculus GN=Afg3l2 PE=1 SV=1	1	3	3	2	3.4	3.4	2.4	89.518	802	4.3029	1.1	0	0	0	0	1.1	1.1	1.2	1.2	1.1	0	0	1.2	0	0	0	2.1	2.4	1.1	2.4	0	0	0	0				Q8JZQ2	81914515	69597	Afg3l2	Q8JZQ2
209	Aflatoxin B1 aldehyde reductase member 2 OS=Mus musculus GN=Akr7a2 PE=1 SV=3	Aflatoxin B1 aldehyde reductase member 2 OS=Mus musculus GN=Akr7a2 PE=1 SV=3	ALQTTYGTNAPR-FFGNNWAETYR-FYAYNPLAGGLLTGK-SLKPDSIRSQLETSLK-VDLFYLHAPDHSTPVEETLR	5	5	5	>sp|Q8CG76|ARK72_MOUSE Aflatoxin B1 aldehyde reductase member 2 OS=Mus musculus GN=Akr7a2 PE=1 SV=3	1	5	5	5	20.2	20.2	20.2	40.612	367	12.777	10.4	10.4	10.4	10.4	10.4	7.1	7.1	14.7	3	7.4	7.4	7.1	4.1	7.4	7.4	10.4	0	4.1	7.4	15.8	4.1	10.4	7.1	4.1				Q8CG76	341940593	110198	Akr7a2	Q8CG76
210	AH receptor-interacting protein OS=Mus musculus GN=Aip PE=1 SV=1	AH receptor-interacting protein OS=Mus musculus GN=Aip PE=1 SV=1	AHAAVWNAQEAQADFAK-NIAEGKDPLEGQR-TLHSDNEGSVIDDSR-VLELDPALAPVVSR-YYDAIACLK	5	5	5	>sp|O08915|AIP_MOUSE AH receptor-interacting protein OS=Mus musculus GN=Aip PE=1 SV=1	1	5	5	5	20.6	20.6	20.6	37.605	330	22.228	20.6	20.6	16.7	13.3	17.9	13.3	13.9	16.7	8.2	12.7	16.1	13.9	13.3	8.2	13.3	4.2	0	17.9	17.9	12.7	4.2	13.9	17.9	6.7		208		O08915	6225017	11632	Aip	O08915
211	A-kinase anchor protein 12 OS=Mus musculus GN=Akap12 PE=1 SV=1	A-kinase anchor protein 12 OS=Mus musculus GN=Akap12 PE=1 SV=1	AEPEILELESK-AQENVELPQLK-DVLEPTQALAAGAVPILAK-ELEVPVHTGPNSQK-IVQSVIQTAVDQFAR-QEQAAVEDSGPGEINEDDPDVPAVVPLSEYDAVER-QSQVTEEEAAAAQTEGPSTPSSFPAQEEHR-SDTVQLLTVK-TLVHTVSVAVIDGTR	9	9	9	>sp|Q9WTQ5|AKA12_MOUSE A-kinase anchor protein 12 OS=Mus musculus GN=Akap12 PE=1 SV=1	1	9	9	9	9.5	9.5	9.5	180.69	1684	20.222	4.2	2	5.6	1.1	4.5	2.7	5.4	3.3	4.1	4.2	5.3	5.3	5	1.1	1.1	0.9	2.1	0.9	2.7	4.5	1.8	5.1	3.3	3.8				Q9WTQ5	81869784	83397	Akap12	Q9WTQ5
212	A-kinase anchor protein 2 OS=Mus musculus GN=Akap2 PE=1 SV=3	A-kinase anchor protein 2 OS=Mus musculus GN=Akap2 PE=1 SV=3	SVNVSLTQEELDSGLDELSVR-YSEAAELR	2	2	2	>sp|O54931|AKAP2_MOUSE A-kinase anchor protein 2 OS=Mus musculus GN=Akap2 PE=1 SV=3	1	2	2	2	3.2	3.2	3.2	98.577	893	5.2004	3.2	2.4	3.2	0	0.9	0	2.4	2.4	0	0	3.2	0	0.9	0	0	3.2	0	0	0.9	2.4	0	0.9	0	0				O54931	254763434	11641	Akap2	O54931
213	A-kinase anchor protein 8 OS=Mus musculus GN=Akap8 PE=1 SV=1	A-kinase anchor protein 8 OS=Mus musculus GN=Akap8 PE=1 SV=1	LPDKTVEFLQEYIINR-QFPLYEEPDAK	2	2	2	>sp|Q9DBR0|AKAP8_MOUSE A-kinase anchor protein 8 OS=Mus musculus GN=Akap8 PE=1 SV=1	1	2	2	2	3.9	3.9	3.9	76.293	687	2.5907	1.6	2.3	2.3	3.9	0	0	3.9	2.3	2.3	0	0	1.6	0	0	2.3	0	0	0	1.6	2.3	1.6	0	0	1.6				Q9DBR0	62899889	56399	Akap8	Q9DBR0
214	Alanine--tRNA ligase, cytoplasmic OS=Mus musculus GN=Aars PE=1 SV=1	Alanine--tRNA ligase, cytoplasmic OS=Mus musculus GN=Aars PE=1 SV=1	AVFDETYPDPVR-DAAHLVNQDDPNVLEIWNLVFIQYNR-DIINEEEVQFLK-EIADLGEALATAVIPQWQK-GAGDEDLIMLDIYAIEELR-GGYVLHIGTIYGNLK-IVAVTGAEAQK-LFIDEPR-LVSVLQNK-LYVTYFGGDEAAGLEPDLECR-NSSHAGAFVIVTEEAIAK-NVGCLQEALQLATSFAQLR-QIWQNLGLDEAR-TIPGDTAWLLYDTYGFPVDLTGLIAEEK-TITVALADGGRPDNTGR-YNYQSDSSGSYVFECTVATVLALR	16	16	16	>sp|Q8BGQ7|SYAC_MOUSE Alanine--tRNA ligase, cytoplasmic OS=Mus musculus GN=Aars PE=1 SV=1	1	16	16	16	27.7	27.7	27.7	106.91	968	101.18	14.6	14.9	15.3	10.4	12.7	11.6	12.2	15.1	2.2	7.9	4	8.9	4.8	6.4	11.8	16.4	11.5	7.5	6.9	22.1	9.6	9.9	16	16.1		152;501;947		Q8BGQ7	47117019	234734	Aars	Q8BGQ7
215	Alanyl-tRNA editing protein Aarsd1 OS=Mus musculus GN=Aarsd1 PE=1 SV=2	Alanyl-tRNA editing protein Aarsd1 OS=Mus musculus GN=Aarsd1 PE=1 SV=2	ELSLDDPEVEQVR-GAGLFLLAGPAEAVETLGPR-GAQADHFTESPLSPGSQVQVR-NNLNLLR-SVIELDSPSVTAEQVAAIEQSVNQK	5	5	5	>sp|Q3THG9|AASD1_MOUSE Alanyl-tRNA editing protein Aarsd1 OS=Mus musculus GN=Aarsd1 PE=1 SV=2	1	5	5	5	20.9	20.9	20.9	44.97	412	7.4983	9.2	0	0	0	6.1	0	0	0	10.9	6.1	12.9	0	0	0	0	0	0	6.1	0	0	0	6.1	0	0				Q3THG9	125987703	69684	Aarsd1	Q3THG9
216	Alcohol dehydrogenase [NADP(+)] OS=Mus musculus GN=Akr1a1 PE=1 SV=3	Alcohol dehydrogenase [NADP(+)] OS=Mus musculus GN=Akr1a1 PE=1 SV=3	ALEVLVAK-ALGLSNFNSR-AVPREELFVTSK-AWRHPDEPVLLEEPVVLALAEK-DAGHPLYPFNDPY-EELFVTSK-GLEVTAYSPLGSSDR-HIDCASVYGNETEIGEALK-HPDEPVLLEEPVVLALAEK-ILQNIQVFDFTFSPEEMK-MPLIGLGTWK-SPAQILLR-YIVPMITVDGK	13	13	13	>sp|Q9JII6|AK1A1_MOUSE Alcohol dehydrogenase [NADP(+)] OS=Mus musculus GN=Akr1a1 PE=1 SV=3	1	13	13	13	44.9	44.9	44.9	36.586	325	206.34	33.5	26.2	25.2	31.4	35.7	32	26.2	33.5	36	24.3	34.8	25.2	24.9	28.9	32.9	28.9	12.9	22.5	29.2	40.3	24.9	21.5	33.5	16.3		46	14;286;302	Q9JII6	22653628	58810	Akr1a1	Q9JII6
217	Alcohol dehydrogenase class-3 OS=Mus musculus GN=Adh5 PE=1 SV=3; Alcohol dehydrogenase class 4 mu/sigma chain OS=Mus musculus GN=Adh7 PE=2 SV=2	Alcohol dehydrogenase class-3 OS=Mus musculus GN=Adh5 PE=1 SV=3	AAVAWEAGKPLSIEEIEVAPPK-AGDTVIPLYIPQCGECK-AKEFGASECISPQDFSK-EFGASECISPQDFSK-GTAFGGWK-IDPSAPLDK-IDPSAPLDKVCLLGCGISTGYGAAVNTAK-VCLLGCGISTGYGAAVNTAK-VDEFVTGNLSFDQINQAFDLMHSGDSIR-IIGIDINK	10;1	10;1	10;1	>sp|P28474|ADHX_MOUSE Alcohol dehydrogenase class-3 OS=Mus musculus GN=Adh5 PE=1 SV=3	2	10	10	10	34.5	34.5	34.5	39.547	374	153.93	22.5	15	11.2	15.8	20.3	14.4	10.4	15.8	17.4	20.3	15.8	17.9	12.6	15	14.4	19.8	5.9	15.8	13.6	31.8	15.8	13.6	15.8	15		97;100;170;174;240		P28474	110825702	11532	Adh5	P28474
218	Aldehyde dehydrogenase family 16 member A1 OS=Mus musculus GN=Aldh16a1 PE=2 SV=2	Aldehyde dehydrogenase family 16 member A1 OS=Mus musculus GN=Aldh16a1 PE=2 SV=2	AGLLWALAAALER-AWSQLPGAAR-EALALANGTPR-GAVEAAHQAAPGWGAQSPR-LLWTLESLVTGR	5	5	5	>sp|Q571I9|A16A1_MOUSE Aldehyde dehydrogenase family 16 member A1 OS=Mus musculus GN=Aldh16a1 PE=2 SV=2	1	5	5	5	8.1	8.1	8.1	84.755	802	7.853	5.1	1.2	0	6.5	6.5	5	5	2.6	3.9	2.7	1.5	2.6	3.6	1.4	0	5.1	0	3.7	2.6	5.2	1.2	0	0	2.6				Q571I9	166198365	69748	Aldh16a1	Q571I9
219	Aldehyde dehydrogenase family 3 member B1 OS=Mus musculus GN=Aldh3b1 PE=2 SV=1	Aldehyde dehydrogenase family 3 member B1 OS=Mus musculus GN=Aldh3b1 PE=2 SV=1	FYGDNPQTSPNLGR-ILAEVLPR-NLATQLDSAFIR-VAIGGQSDEGER	4	4	4	>sp|Q80VQ0|AL3B1_MOUSE Aldehyde dehydrogenase family 3 member B1 OS=Mus musculus GN=Aldh3b1 PE=2 SV=1	1	4	4	4	9.8	9.8	9.8	52.292	468	9.3329	0	3	0	0	3	3	3	0	1.7	0	7.3	3	3	0	0	0	0	0	0	8.1	0	0	3	3				Q80VQ0	67460523	67689	Aldh3b1	Q80VQ0
220	Aldehyde dehydrogenase X, mitochondrial OS=Mus musculus GN=Aldh1b1 PE=1 SV=1	Aldehyde dehydrogenase X, mitochondrial OS=Mus musculus GN=Aldh1b1 PE=1 SV=1	EEIFGPVQPLFK-IAKEEIFGPVQPLFK-LFINNEWHDAVSK-VAEQTPLSALYLASLIK-YGLAAAVFTR	6	5	5	>sp|Q9CZS1|AL1B1_MOUSE Aldehyde dehydrogenase X, mitochondrial OS=Mus musculus GN=Aldh1b1 PE=1 SV=1	1	6	5	5	12.1	10.6	10.6	57.552	519	14.919	4.8	9.6	9.6	9.6	7.7	7.7	9.6	9.6	6.7	4.8	12.1	9.6	1.5	1.5	4.8	4.8	4.8	6.7	9.6	7.7	6.4	6.7	7.7	7.7				Q9CZS1	81904561	72535	Aldh1b1	Q9CZS1
221	Aldehyde dehydrogenase, cytosolic 1 OS=Mus musculus GN=Aldh1a7 PE=2 SV=1	Aldehyde dehydrogenase, cytosolic 1 OS=Mus musculus GN=Aldh1a7 PE=2 SV=1	IHGQTIPSDGNIFTYTR-ILGLIESGK-LFVEESIYDEFVR	7	3	3	>sp|O35945|AL1A7_MOUSE Aldehyde dehydrogenase, cytosolic 1 OS=Mus musculus GN=Aldh1a7 PE=2 SV=1	1	7	3	3	17.6	7.8	7.8	54.587	501	14.574	3.6	8.8	8.8	8.8	3.6	9.8	9.8	9.8	8.8	6.4	11.6	9.8	5.4	3.6	9.8	11.6	1.6	6.2	6.4	11.6	6.4	3.6	15.8	15.8				O35945	81886650	26358	Aldh1a7	O35945
222	Aldehyde dehydrogenase, mitochondrial OS=Mus musculus GN=Aldh2 PE=1 SV=1; Retinal dehydrogenase 2 OS=Mus musculus GN=Aldh1a2 PE=2 SV=2; Aldehyde dehydrogenase family 1 member A3 OS=Mus musculus GN=Aldh1a3 PE=2 SV=1	Aldehyde dehydrogenase, mitochondrial OS=Mus musculus GN=Aldh2 PE=1 SV=1	AAFQLGSPWR-DGMTIAKEEIFGPVMQILK-EAGFPPGVVNIVPGFGPTAGAAIASHEGVDK-EEIFGPVMQILK-ELGEYGLQAYTEVK-GYFIQPTVFGDVK-LADLIER-LGPALATGNVVVMK-LLCGGGAAADR-TEQGPQVDETQFK-TEQGPQVDETQFKK-TFPTVNPSTGEVICQVAEGNKEDVDK-TFVQENVYDEFVER-TIEEVVGR-TIPIDGDFFSYTR-VAEQTPLTALYVANLIK-VAFTGSTEVGHLIQVAAGSSNLK-VAFTGSTEVGHLIQVAAGSSNLKR-VVGNPFDSR-YGLAAAVFTK-YYAGWADK-VTLELGGK	22;2;1	22;2;1	21;1;0	>sp|P47738|ALDH2_MOUSE Aldehyde dehydrogenase, mitochondrial OS=Mus musculus GN=Aldh2 PE=1 SV=1	3	22	22	21	52	52	50.5	56.537	519	323.31	50.7	38.7	48.2	50.7	46.8	47	45.5	45.3	46.8	43.7	50.5	42	45.7	33.5	43.9	50.3	27.4	50.7	39.5	52	43.2	50.5	52	46.1		68;388	210;412;424	P47738	1352250	11669	Aldh2	P47738
223	Aldo-keto reductase family 1 member C13 OS=Mus musculus GN=Akr1c13 PE=1 SV=2	Aldo-keto reductase family 1 member C13 OS=Mus musculus GN=Akr1c13 PE=1 SV=2	GIVPLAQSFK-HVDTAYAYQVEEEIGQAIQSK-SGDNDFPVNEQGK-SPALIALR-YLPAEFLVDHPEYPFVEEY	5	5	5	>sp|Q8VC28|AK1CD_MOUSE Aldo-keto reductase family 1 member C13 OS=Mus musculus GN=Akr1c13 PE=1 SV=2	1	5	5	5	22	22	22	37.057	323	8.2943	9.6	12.4	9.6	6.5	11.5	15.5	7.1	6.5	13.6	9	19.5	11.5	2.5	6.5	18.9	18.9	0	13.6	2.5	12.4	2.5	5.6	11.5	5.6				Q8VC28	27805400	27384	Akr1c13	Q8VC28
224	Aldose 1-epimerase OS=Mus musculus GN=Galm PE=2 SV=1	Aldose 1-epimerase OS=Mus musculus GN=Galm PE=2 SV=1	ASDVVLGFAELEGYLQK-ILEVYTTQPGVQFYTGNFLDGTLK-TVFGELPSGGGTVEK-VLWTPQVLTNGVQFFR-VSPDGEEGYPGELK-VWVTYTLDGGELVINYR	6	6	6	>sp|Q8K157|GALM_MOUSE Aldose 1-epimerase OS=Mus musculus GN=Galm PE=2 SV=1	1	6	6	6	30.1	30.1	30.1	37.798	342	15.578	14	16.7	4.7	4.7	21.1	9.6	16.4	9.1	16.7	9.4	7	16.1	4.4	0	16.7	16.7	0	14.3	9.4	25.1	0	19	26	4.4				Q8K157	78100134	319625	Galm	Q8K157
225	Aldose reductase OS=Mus musculus GN=Akr1b1 PE=1 SV=3	Aldose reductase OS=Mus musculus GN=Akr1b1 PE=1 SV=3	DYPFHAEV-EVGVALQEK-GIVVTAYSPLGSPDRPWAKPEDPSLLEDPR-HIDCAQVYQNEK-HIDCAQVYQNEKEVGVALQEK-MPTLGLGTWK-NLVVIPK-QDLFIVSK-RQDLFIVSK-SPPGQVTEAVK-TIGVSNFNPLQIER-TTAQVLIR-VAIDLGYR-VCALMSCAK	14	14	14	>sp|P45376|ALDR_MOUSE Aldose reductase OS=Mus musculus GN=Akr1b1 PE=1 SV=3	1	14	14	14	42.7	42.7	42.7	35.732	316	323.31	37.3	40.5	25.3	42.4	34.8	37	40.5	38	35.4	34.2	37.3	36.7	27.8	27.2	42.4	34.2	16.1	33.9	31.6	42.4	33.9	30.4	39.6	36.1		45;299;304	13;302	P45376	1351911	11677	Akr1b1	P45376
226	Aldose reductase-related protein 1 OS=Mus musculus GN=Akr1b7 PE=2 SV=4	Aldose reductase-related protein 1 OS=Mus musculus GN=Akr1b7 PE=2 SV=4	ALGISNFNHFQIER-LWATFFEK-MPLVGLGTWK-TVAQVLIR	7	4	4	>sp|P21300|ALD1_MOUSE Aldose reductase-related protein 1 OS=Mus musculus GN=Akr1b7 PE=2 SV=4	1	7	4	4	19.9	12.7	12.7	35.988	316	4.6894	7.6	7	9.5	12	9.5	7	7.6	9.5	7.6	7.3	10.8	12	7.6	0	5.1	2.5	2.5	0	9.5	12	2.5	5.1	5.1	5.1				P21300	231525	11997	Akr1b7	P21300
227	Aldose reductase-related protein 2 OS=Mus musculus GN=Akr1b8 PE=1 SV=2	Aldose reductase-related protein 2 OS=Mus musculus GN=Akr1b8 PE=1 SV=2	AAIDAGYR-EDLFIVSK-NVVVIPK-ALGVSNFNHFQIER-GISVTAYSPLGSPDRPSAKPEDPSLLEDPK-TSAQVLIR-TTFLEAWEGMEELVDQGLVK	7	7	4	>sp|P45377|ALD2_MOUSE Aldose reductase-related protein 2 OS=Mus musculus GN=Akr1b8 PE=1 SV=2	1	7	7	4	30.1	30.1	22.8	36.12	316	21.47	15.8	7	7	7	7	4.4	9.5	7	19	14.2	18.4	9.5	7.6	0	9.5	10.8	2.5	0	7	15.8	2.5	21.5	2.5	2.5				P45377	1168404	14187	Akr1b8	P45377
228	Allograft inflammatory factor 1 OS=Mus musculus GN=Aif1 PE=1 SV=1	Allograft inflammatory factor 1 OS=Mus musculus GN=Aif1 PE=1 SV=1	EVSSGSEETFSYSDFLR-MILMYEEK-QFLDDPK-YSNDEDLPSKLEAFK	4	4	4	>sp|O70200|AIF1_MOUSE Allograft inflammatory factor 1 OS=Mus musculus GN=Aif1 PE=1 SV=1	1	4	4	4	32	32	32	16.91	147	37.249	26.5	27.2	20.4	11.6	10.2	11.6	21.8	16.3	26.5	0	0	32	10.2	11.6	11.6	21.8	10.2	0	21.8	26.5	32	21.8	26.5	15.6			120;123	O70200	62899673	11629	Aif1	O70200
229	Alpha/beta hydrolase domain-containing protein 11 OS=Mus musculus GN=Abhd11 PE=1 SV=1	Alpha/beta hydrolase domain-containing protein 11 OS=Mus musculus GN=Abhd11 PE=1 SV=1	EPYSGPTLFLLGGNSTYVQPSHHSEIR-LNLDTLAQHLDK-QFLLTNLVEVGGR	3	3	3	>sp|Q8K4F5|ABHDB_MOUSE Alpha/beta hydrolase domain-containing protein 11 OS=Mus musculus GN=Abhd11 PE=1 SV=1	1	3	3	3	16.9	16.9	16.9	33.56	307	6.1845	8.1	0	0	8.8	3.9	0	0	3.9	13	3.9	13	0	3.9	3.9	0	16.9	3.9	4.2	3.9	13	8.8	3.9	3.9	8.1				Q8K4F5	81878678	68758	Abhd11	Q8K4F5
230	Alpha/beta hydrolase domain-containing protein 14B OS=Mus musculus GN=Abhd14b PE=2 SV=1	Alpha/beta hydrolase domain-containing protein 14B OS=Mus musculus GN=Abhd14b PE=2 SV=1	AVAIDLPGLGR-FSSETWQNLGTLQR-FSVLLLHGIR-GLLDFLQGLA	4	4	4	>sp|Q8VCR7|ABHEB_MOUSE Alpha/beta hydrolase domain-containing protein 14B OS=Mus musculus GN=Abhd14b PE=2 SV=1	1	4	4	4	21.4	21.4	21.4	22.45	210	7.1665	16.7	5.2	11.9	16.7	11.9	16.7	0	11.9	21.4	11.9	5.2	16.7	5.2	5.2	11.9	16.7	11.9	10	11.9	16.7	16.7	11.9	16.7	11.9				Q8VCR7	34222609	---	Abhd14b	Q8VCR7
232	Alpha-1-acid glycoprotein 1 OS=Mus musculus GN=Orm1 PE=1 SV=1	Alpha-1-acid glycoprotein 1 OS=Mus musculus GN=Orm1 PE=1 SV=1	GLSLYAK-YEGGVETFAHLIVLR-RPDITPELR	3	3	2	>sp|Q60590|A1AG1_MOUSE Alpha-1-acid glycoprotein 1 OS=Mus musculus GN=Orm1 PE=1 SV=1	1	3	3	2	15	15	10.6	23.895	207	48.984	10.6	15	7.7	11.6	11.6	11.6	11.6	11.6	11.6	15	7.2	15	3.4	0	7.2	11.6	0	7.2	10.6	11.6	7.2	10.6	10.6	10.6				Q60590	2497692	18405	Orm1	Q60590
233	Alpha-1-acid glycoprotein 2 OS=Mus musculus GN=Orm2 PE=1 SV=1	Alpha-1-acid glycoprotein 2 OS=Mus musculus GN=Orm2 PE=1 SV=1	IFADLIVLK	2	1	1	>sp|P07361|A1AG2_MOUSE Alpha-1-acid glycoprotein 2 OS=Mus musculus GN=Orm2 PE=1 SV=1	1	2	1	1	8.7	4.3	4.3	23.843	207	3.7571	0	8.7	8.7	8.7	4.3	8.7	4.3	8.7	4.3	8.7	4.3	4.3	0	4.3	0	8.7	0	4.3	4.3	8.7	4.3	4.3	4.3	4.3				P07361	112878	18406	Orm2	P07361
234	Alpha-1-antitrypsin 1-3 OS=Mus musculus GN=Serpina1c PE=1 SV=2; Alpha-1-antitrypsin 1-1 OS=Mus musculus GN=Serpina1a PE=1 SV=4	Alpha-1-antitrypsin 1-3 OS=Mus musculus GN=Serpina1c PE=1 SV=2; Alpha-1-antitrypsin 1-1 OS=Mus musculus GN=Serpina1a PE=1 SV=4	IFNNGADLSGITEENAPLKLSQAVHK-KPFDPENTEEAEFHVDESTTVK-LAQIHFPR-LSISGEYNLK	14;14	4;4	4;4	>sp|Q00896|A1AT3_MOUSE Alpha-1-antitrypsin 1-3 OS=Mus musculus GN=Serpina1c PE=1 SV=2;>sp|P07758|A1AT1_MOUSE Alpha-1-antitrypsin 1-1 OS=Mus musculus GN=Serpina1a PE=1 SV=4	2	14	4	4	43.4	16	16	45.823	412	323.31	41.7	26.5	25.2	35.2	41.7	39.3	39.3	39.8	41.7	39.8	39.3	32.3	23.5	16.3	33.3	36.4	28.6	20.4	41.5	34.5	25.7	34.2	41.7	36.4			321	Q00896	205371731	20702	Serpina1c	Q00896
235	Alpha-1-antitrypsin 1-2 OS=Mus musculus GN=Serpina1b PE=1 SV=2	Alpha-1-antitrypsin 1-2 OS=Mus musculus GN=Serpina1b PE=1 SV=2	ELDQDTVFALANYILFK-IVEAVKELDQDTVFALANYILFK-KPFDPENTEEAEFHVDK-LSISGDYNLK-LVQIHIPR-DQSPASHEIATNLGDFAISLYR	15	6	5	>sp|P22599|A1AT2_MOUSE Alpha-1-antitrypsin 1-2 OS=Mus musculus GN=Serpina1b PE=1 SV=2	1	15	6	5	45	19.4	14	45.974	413	323.31	37.8	22.8	23.5	29.1	34.4	35.8	37.8	34.4	31	34.4	42.9	26.9	25.7	13.8	29.1	36.1	23.2	18.2	35.1	36.6	25.7	31.7	35.8	35.8			321	P22599	68053333	20701	Serpina1b	P22599
236	Alpha-1-antitrypsin 1-4 OS=Mus musculus GN=Serpina1d PE=2 SV=1	Alpha-1-antitrypsin 1-4 OS=Mus musculus GN=Serpina1d PE=2 SV=1	IFNNGADLSGITEENAPLKLSK-MQHLEQTLNK-IFNNGADLSGITEENAPLK-NHYQAEVFSVNFAESEEAK-NHYQAEVFSVNFAESEEAKK-SFQHLLQTLNRPDSELQLSTGNGLFVNNDLK-TLMSPLGITR-VINDFVEK-VINDFVEKGTQGK-KLDQDTVFALANYILFK-LDQDTVFALANYILFK-AVLTIDETGTEAAAATVLQVATYSMPPIVR-DQSPASHEIATNLGDFALR-ELISQFLLNR-ELISQFLLNRR-LSISGNYNLK	16	16	5	>sp|Q00897|A1AT4_MOUSE Alpha-1-antitrypsin 1-4 OS=Mus musculus GN=Serpina1d PE=2 SV=1	1	16	16	5	46.7	46.7	16.9	45.998	413	323.31	36.1	28.6	27.6	35.1	36.3	36.3	36.3	36.3	36.8	36.1	38.5	28.8	18.6	18.6	34.9	36.8	20.3	27.4	37	44.3	27.4	29.3	36.3	36.3			321	Q00897	3023212	20703	Serpina1d	Q00897
237	Alpha-1-antitrypsin 1-5 OS=Mus musculus GN=Serpina1e PE=1 SV=1	Alpha-1-antitrypsin 1-5 OS=Mus musculus GN=Serpina1e PE=1 SV=1	IFNSGADLSGITEENAPLK-IFNSGADLSGITEENAPLKLSQAVHK-KLEQDTVFVLANYILFK-LAQIHIPR-LEQDTVFVLANYILFK-LSISGNYNLETLMSPLGITR-QAEFHVDESTTVK	13	7	7	>sp|Q00898|A1AT5_MOUSE Alpha-1-antitrypsin 1-5 OS=Mus musculus GN=Serpina1e PE=1 SV=1	1	13	7	7	36.1	20.3	20.3	45.891	413	323.31	32	19.9	18.4	27.6	33.7	28.8	26.9	28.8	25.7	24	34.4	21.1	18.6	13.3	20.8	27.1	16.7	17.4	28.8	28.6	19.9	28.8	30	30			321	Q00898	3023213	20704	Serpina1e	Q00898
238	Alpha-2-antiplasmin OS=Mus musculus GN=Serpinf2 PE=1 SV=1	Alpha-2-antiplasmin OS=Mus musculus GN=Serpinf2 PE=1 SV=1	GFPIKDDFLEQSER-LPLPALFK-LTGKQEEDLANINQWVK-NPNPSALPQLQEQR-WFLLEQPEIQVAHFPFK	5	5	5	>sp|Q61247|A2AP_MOUSE Alpha-2-antiplasmin OS=Mus musculus GN=Serpinf2 PE=1 SV=1	1	5	5	5	14.3	14.3	14.3	54.971	491	12.85	10.8	6.3	1.6	4.5	10.8	10.8	11.4	7.9	5.1	4.5	1.6	11.4	7.3	6.3	3.5	14.3	7.9	5.7	7.9	8.6	4.5	14.3	10.8	9.2				Q61247	2500773	18816	Serpinf2	Q61247
239	Alpha-2-HS-glycoprotein OS=Mus musculus GN=Ahsg PE=1 SV=1;CON__P12763	Alpha-2-HS-glycoprotein OS=Mus musculus GN=Ahsg PE=1 SV=1	AQNVPLPVSTLVEFVIAATDCTAK-ELACDDPEAEQVALLAVDYLNNHLLQGFK-HAFSPVASVESASGETLHSPK-QVLNQIDK-QVLNQIDKVK-CNLLAEK	6;1	6;1	6;1	>sp|P29699|FETUA_MOUSE Alpha-2-HS-glycoprotein OS=Mus musculus GN=Ahsg PE=1 SV=1	2	6	6	6	26.4	26.4	26.4	37.325	345	323.31	26.4	11	2.3	8.4	15.9	20.3	20.3	9	18	11.9	13	15.9	13	6.1	11.9	20.3	18	0	15.4	26.4	9	18	11.9	20.3		32;208;219		P29699	231466	11625	Ahsg	P29699
240	Alpha-2-macroglobulin OS=Mus musculus GN=A2m PE=1 SV=3; Alpha-2-macroglobulin-P OS=Mus musculus GN=A2mp PE=2 SV=2	Alpha-2-macroglobulin OS=Mus musculus GN=A2m PE=1 SV=3	AAPLSLCALTAVDQSVLLLKPEAK-AESPVFVQTDKPIYKPGQIVK-AFAQAQSHIFIEK-AINYLISGYQR-ALLAYAFALAGNK-ALSFYQPR-APFALQVNTLPLNFDK-DLSSSDLSTASK-DLTFYYLIK-GSGSGCVYLQTSLK-GSIFNLGSHVLSLEQGNMK-HSLGDNDAHSIFQSVGINIFTNSK-IFQWQNIHLAGGLHQLSFPLSVEPALGIYK-IKEEGTGIELTGIGSCEIANALSK-KLQDQPNIQR-KYFPETWIWDLVPLDVSGDGELAVK-LLLQEVR-LLTDQAVDK-LPDLPGNYVTK-LQDQPNIQR-LSPQSIYNLLPGK-NEKDLTFYYLIK-QLNYQHSDGSYSTFGNHGGGNTPGNTWLTAFVLK-QQNSHGGF…	36;1	36;1	36;1	>sp|Q61838|A2M_MOUSE Alpha-2-macroglobulin OS=Mus musculus GN=A2m PE=1 SV=3	2	36	36	36	36.2	36.2	36.2	165.85	1495	323.31	31.2	17.8	26.2	27.2	22.3	22.1	22.9	23.9	22.7	23.1	27.7	22.7	17.7	19	19.5	31.1	14.6	25.4	21.2	33.1	19.9	30.4	28.9	26.6		340;594;859;861;1339	519	Q61838	338817897	11287	A2m	Q61838
241	Alpha-2-macroglobulin receptor-associated protein OS=Mus musculus GN=Lrpap1 PE=1 SV=1	Alpha-2-macroglobulin receptor-associated protein OS=Mus musculus GN=Lrpap1 PE=1 SV=1	FSSEELDKLWR-IQEYNVLLDTLSR-LIHNLNVILAR-YVLLEEK	4	4	4	>sp|P55302|AMRP_MOUSE Alpha-2-macroglobulin receptor-associated protein OS=Mus musculus GN=Lrpap1 PE=1 SV=1	1	4	4	4	11.7	11.7	11.7	42.215	360	5.9231	3.1	3.1	6.1	3.1	3.1	0	1.9	3.1	9.7	3.1	6.7	8.6	3.1	3.1	0	6.1	0	0	0	3.1	0	6.7	3.1	1.9				P55302	1703290	16976	Lrpap1	P55302
242	Alpha-actinin-1 OS=Mus musculus GN=Actn1 PE=1 SV=1	Alpha-actinin-1 OS=Mus musculus GN=Actn1 PE=1 SV=1	ACLISLGYDIGNDPQGEAEFAR-AGTQIENIEEDFRDGLK-DDPLTNLNTAFDVAER-DGLGFCALIHR-DYETATLSEIK-ETADTDTADQVMASFK-GISQEQMNEFR-HRPELIDYGK-ICDQWDNLGALTQK-IDQLECDHQLIQEALIFDNK-ILAGDKNYITEDELR-IMSIVDPNR-ISIEMHGTLEDQLSHLR-IVQTYHVNMAGTNPYTTITPQEINGK-KDDPLTNLNTAFDVAER-KQFGAQANVIGPWIQTK-LAILGIHNEVSK-LLETIDQLYLEYAK-LLETIDQLYLEYAKR-MLDAEDIVGTARPDEK-MVSDINNAWGCLEQAEK-NVNIQNFHISWK-NYITEDELR-QFGAQANVIGPWIQTK-QKDYETATLSEIK-V…	46	46	27	>sp|Q7TPR4|ACTN1_MOUSE Alpha-actinin-1 OS=Mus musculus GN=Actn1 PE=1 SV=1	1	46	46	27	62.9	62.9	39.1	103.07	892	323.31	58.6	40.7	47.6	45	50.8	42.5	48.5	45.9	41.1	47.2	45.3	53.7	44.3	35.3	40.2	43.6	48.9	48.3	37.9	54.6	47	57	53.5	46.3		41;154;180;332;370;480;690;774;860	66;122;126;221;239;354;586;660;748;796;830	Q7TPR4	46395721	109711	Actn1	Q7TPR4
243	Alpha-actinin-2 OS=Mus musculus GN=Actn2 PE=1 SV=2	Alpha-actinin-2 OS=Mus musculus GN=Actn2 PE=1 SV=2	LASELLEWIR	12	1	0	>sp|Q9JI91|ACTN2_MOUSE Alpha-actinin-2 OS=Mus musculus GN=Actn2 PE=1 SV=2	1	12	1	0	15.4	1.1	0	103.83	894	323.31	12.8	8.4	13	11.4	13.1	9.3	11.5	10.5	9.3	9.3	8.1	11.2	7.3	8.5	8.3	11.5	10.4	8.9	8.9	11.7	12.3	12.9	10.6	12.8		48;161;339	73;129;133	Q9JI91	408359950	11472	Actn2	Q9JI91
244	Alpha-actinin-4 OS=Mus musculus GN=Actn4 PE=1 SV=1	Alpha-actinin-4 OS=Mus musculus GN=Actn4 PE=1 SV=1	ACLISLGYDVENDRQGDAEFNR-AGTQIENIDEDFRDGLK-ASFNHFDKDHGGALGPEEFK-DDPVTNLNNAFEVAEK-DGLAFNALIHR-DYETATLSDIK-ETTDTDTADQVIASFK-GISQEQMQEFR-ICDQWDNLGSLTHSR-KDDPVTNLNNAFEVAEK-LSGSNPYTTVTPQIINSK-LVSIGAEEIVDGNAK-MAPYQGPDAAPGALDYK-MLDAEDIVNTARPDEK-NFITAEELR-NVNVQNFHISWK-QFASQANMVGPWIQTK-QLETIDQLHLEYAK-QLETIDQLHLEYAKR-QRDYETATLSDIK-SFSTALYGESDL-SIVDYKPSLDLLEQQHQLIQEALIFDNK-TIPWLEDR-VEQIAAIAQELNELDYYDSHNVNTR-V…	42	26	26	>sp|P57780|ACTN4_MOUSE Alpha-actinin-4 OS=Mus musculus GN=Actn4 PE=1 SV=1	1	42	26	26	58.7	37.9	37.9	104.98	912	323.31	53.2	41.4	39.6	45.3	48.9	45.2	47	46.6	46.9	37.5	34.8	48.4	34	34	39.7	41.3	42.8	35.1	39.4	53.1	43.4	49.1	47	47.8		61;174;352;500;794;880	86;142;146;241;259;374;661;768;884	P57780	13123946	60595	Actn4	P57780
245	Alpha-adducin OS=Mus musculus GN=Add1 PE=1 SV=2	Alpha-adducin OS=Mus musculus GN=Add1 PE=1 SV=2	LADLFGWSQLIYNHITTR-SLVQGELVTASK-SPGTPAGEGSGSPPK-SPPDQSAVPNTPPSTPVKLEEDLPQEPTSR-TLASAGGPDNLVLLDPGK-TLASAGGPDNLVLLDPGKYK-TSTSAVPNLFVPLNTNPK-VNLQGDIVDR-VNSEQEHFLIVPFGLLYSEVTASSLVK-MLDNLGYR	10	10	9	>sp|Q9QYC0|ADDA_MOUSE Alpha-adducin OS=Mus musculus GN=Add1 PE=1 SV=2	1	10	10	9	21.5	21.5	20.4	80.646	735	39.401	13.6	14.3	15.9	11.6	11.3	14.6	15.9	11.6	14	9.7	6.5	8.2	7.9	6.9	8.6	14.3	11	6.5	8.2	20.1	8.2	8.2	13.9	6.8			383	Q9QYC0	10719868	11518	Add1	Q9QYC0
246	Alpha-aminoadipic semialdehyde dehydrogenase OS=Mus musculus GN=Aldh7a1 PE=1 SV=4	Alpha-aminoadipic semialdehyde dehydrogenase OS=Mus musculus GN=Aldh7a1 PE=1 SV=4	AWNIWADIPAPK-FQDEEEVFEWNNEVK-GAPTTSLVSVAVTK-KAWNIWADIPAPK-QGLSSSIFTK-VGNPWDPNILYGPLHTK-VNLLSFTGSTQVGK	7	7	7	>sp|Q9DBF1|AL7A1_MOUSE Alpha-aminoadipic semialdehyde dehydrogenase OS=Mus musculus GN=Aldh7a1 PE=1 SV=4	1	7	7	7	15.4	15.4	15.4	58.861	539	24.457	10.9	5.8	10	8.2	5.8	8.2	13.5	8.2	5	8.3	8.2	8.2	2.2	4.8	15.4	2.6	8.2	5.8	5	5	5.8	7.4	10.8	10				Q9DBF1	294862528	110695	Aldh7a1	Q9DBF1
247	Alpha-amylase 1 OS=Mus musculus GN=Amy1 PE=1 SV=2	Alpha-amylase 1 OS=Mus musculus GN=Amy1 PE=1 SV=2	EVSINPDSTCGNDWICEHR	9	1	1	>sp|P00687|AMY1_MOUSE Alpha-amylase 1 OS=Mus musculus GN=Amy1 PE=1 SV=2	1	9	1	1	20.7	3.7	3.7	57.643	511	143.04	10.6	8.2	12.5	5.7	11.9	15.5	18.8	9	2.9	13.5	9	0	0	12.5	13.5	7.6	2.3	0	4.3	0	2.3	9	13.5	17.2		43;393;399	198;217;338;343	P00687	341940214	11722	Amy1	P00687
248	Alpha-centractin OS=Mus musculus GN=Actr1a PE=2 SV=1	Alpha-centractin OS=Mus musculus GN=Actr1a PE=2 SV=1	ACYLSINPQKDETLETEK-AQYYLPDGSTIEIGPSR-DQLQTFSEEHPVLLTEAPLNPR	7	3	3	>sp|P61164|ACTZ_MOUSE Alpha-centractin OS=Mus musculus GN=Actr1a PE=2 SV=1	1	7	3	3	29.3	15.2	15.2	42.613	376	80.95	29.3	16.8	16.8	12.2	18.4	16.8	19.4	19.4	17.3	19.4	24.2	16.8	19.4	13	19.4	21.8	0	17.3	19.4	24.5	19.4	19.4	16.8	12.2		222		P61164	47117652	54130	Actr1a	P61164
249	Alpha-enolase OS=Mus musculus GN=Eno1 PE=1 SV=3; Gamma-enolase OS=Mus musculus GN=Eno2 PE=1 SV=2	Alpha-enolase OS=Mus musculus GN=Eno1 PE=1 SV=3	AAVPSGASTGIYEALELRDNDK-AGYTDQVVIGMDVAASEFYR-DATNVGDEGGFAPNILENK-DATNVGDEGGFAPNILENKEALELLK-EALELLK-FTASAGIQVVGDDLTVTNPK-FTASAGIQVVGDDLTVTNPKR-GVSQAVEHINK-HIADLAGNPEVILPVPAFNVINGGSHAGNK-IEEELGSK-IGAEVYHNLK-LAMQEFMILPVGASSFR-LMIEMDGTENK-SCNCLLLK-SFVQNYPVVSIEDPFDQDDWGAWQK-SGKYDLDFK-SPDDPSRYITPDQLADLYK-TIAPALVSK-VNQIGSVTESLQACK-VNVVEQEK-VNVVEQEKIDK-YDLDFKSPDDPSR-YGKDATNVGDEGGFAPNILENK-YITPDQLADLYK-LA…	28;3	28;3	25;1	>sp|P17182|ENOA_MOUSE Alpha-enolase OS=Mus musculus GN=Eno1 PE=1 SV=3	2	28	28	25	74.7	74.7	66.4	47.14	434	323.31	65.2	65.2	59.2	66.1	68.9	69.8	65.2	58.1	65.2	59	63.8	65.2	46.3	45.2	67.7	66.1	24.4	62	52.5	69.4	54.6	60.4	69.8	61.1		337;339;357;389	94;97;165;169;244;368	P17182	13637776	13806	Eno1	P17182
250	Alpha-hemoglobin-stabilizing protein OS=Mus musculus GN=Ahsp PE=2 SV=1	Alpha-hemoglobin-stabilizing protein OS=Mus musculus GN=Ahsp PE=2 SV=1	AMTEFQQELSTLGSQFLAK-APFQSNKDLISTGIK-DLISTGIK-LVHGEQEEQDRAMTEFQQELSTLGSQFLAK-SKEPPSNTLPSS	5	5	5	>sp|Q9CY02|AHSP_MOUSE Alpha-hemoglobin-stabilizing protein OS=Mus musculus GN=Ahsp PE=2 SV=1	1	5	5	5	55.9	55.9	55.9	11.832	102	85.454	33.3	18.6	0	33.3	33.3	55.9	44.1	0	45.1	55.9	11.8	33.3	0	0	7.8	55.9	55.9	45.1	44.1	49	33.3	44.1	45.1	11.8			67	Q9CY02	23813664	170812	Ahsp	Q9CY02
251	Alpha-internexin OS=Mus musculus GN=Ina PE=1 SV=3; Neurofilament light polypeptide OS=Mus musculus GN=Nefl PE=1 SV=5; Neurofilament medium polypeptide OS=Mus musculus GN=Nefm PE=1 SV=4	Alpha-internexin OS=Mus musculus GN=Ina PE=1 SV=3; Neurofilament light polypeptide OS=Mus musculus GN=Nefl PE=1 SV=5; Neurofilament medium polypeptide OS=Mus musculus GN=Nefm PE=1 SV=4	LLEGEETR	2;2;2	1;1;1	1;1;1	>sp|P46660|AINX_MOUSE Alpha-internexin OS=Mus musculus GN=Ina PE=1 SV=3;>sp|P08551|NFL_MOUSE Neurofilament light polypeptide OS=Mus musculus GN=Nefl PE=1 SV=5;>sp|P08553|NFM_MOUSE Neurofilament medium polypeptide OS=Mus musculus GN=Nefm PE=1 SV=4	3	2	1	1	3.4	1.6	1.6	55.382	501	15.306	3.4	1.8	1.8	1.8	1.8	1.8	1.8	1.8	3.4	3.4	3.4	1.8	3.4	1.8	1.8	1.8	1.8	1.8	1.8	1.8	1.8	3.4	1.8	1.8				P46660	575773387	226180	Ina	P46660
252	Alpha-ketoglutarate-dependent dioxygenase FTO OS=Mus musculus GN=Fto PE=1 SV=1	Alpha-ketoglutarate-dependent dioxygenase FTO OS=Mus musculus GN=Fto PE=1 SV=1	LFTVPWPVK-LLEELEDTWLPYLTPK-LNDYLQVETIQALEELAVR-SEILSAILVPLTVR	4	4	4	>sp|Q8BGW1|FTO_MOUSE Alpha-ketoglutarate-dependent dioxygenase FTO OS=Mus musculus GN=Fto PE=1 SV=1	1	4	4	4	11.6	11.6	11.6	58.006	502	18.093	8.4	1.8	0	6.6	6.6	9.8	8.4	6.6	7	2.8	2.8	2.8	2.8	0	0	6.6	6.6	0	6.6	11.6	0	6.6	6.6	3.8				Q8BGW1	81873739	26383	Fto	Q8BGW1
253	Alpha-mannosidase 2 OS=Mus musculus GN=Man2a1 PE=1 SV=2	Alpha-mannosidase 2 OS=Mus musculus GN=Man2a1 PE=1 SV=2	AAEILYQLALK-DWVVVDYGTR-IIGDSAFLLILK-IIIQLSAQEPR-ILESQSSSSHLADYVLYNNDGLAENGIFHVK-IQFGTLSDYFDALEK-LFQSLNSLEK-TISQAAYEVSFLAHIPPLGLK-TLEFFWR-VLLAPLGDDFR-YLVVYNPFEQER-YYTDLNGYQIQPR	12	12	12	>sp|P27046|MA2A1_MOUSE Alpha-mannosidase 2 OS=Mus musculus GN=Man2a1 PE=1 SV=2	1	12	12	12	14.3	14.3	14.3	131.63	1150	27.315	4.9	4.4	9.9	8.6	7.3	3	9.9	9.7	7	5.8	8.2	3.9	4	2.9	4	9.9	1.8	1	6.3	9.6	6.2	6.9	11.8	11.8				P27046	341940926	17158	Man2a1	P27046
254	Alpha-mannosidase 2C1 OS=Mus musculus GN=Man2c1 PE=2 SV=1	Alpha-mannosidase 2C1 OS=Mus musculus GN=Man2c1 PE=2 SV=1	GLLIINTLPWK-GNVLSLSLLR-SAQFLYPAAQLQHLWR-VQLSSPGQLFTALER	4	4	4	>sp|Q91W89|MA2C1_MOUSE Alpha-mannosidase 2C1 OS=Mus musculus GN=Man2c1 PE=2 SV=1	1	4	4	4	5	5	5	115.69	1039	5.0167	3	2	2.5	1	2.5	0	3.5	3	1.4	1.1	1.4	2.5	0	0	1.4	0	0	2.5	1.1	1.1	2.5	1.4	4	2.5				Q91W89	27923802	73744	Man2c1	Q91W89
255	Alpha-N-acetylgalactosaminidase OS=Mus musculus GN=Naga PE=2 SV=2	Alpha-N-acetylgalactosaminidase OS=Mus musculus GN=Naga PE=2 SV=2	AQMALWTVLAAPLLMSTDLR-DIQDSWK-INQDPLGIQGR-LAQDGWR-LDGCFSSSR-SVLSILDWFVR-YLSNQASALVFFSR	7	7	7	>sp|Q9QWR8|NAGAB_MOUSE Alpha-N-acetylgalactosaminidase OS=Mus musculus GN=Naga PE=2 SV=2	1	7	7	7	19	19	19	47.234	415	22.64	3.4	2.7	2.7	4.3	2.7	2.7	6	2.7	12.3	6	8.7	4.3	2.7	2.7	2.7	10.4	0	4.3	6	12.3	4.8	2.7	7.7	6		158	270;282	Q9QWR8	67461084	17939	Naga	Q9QWR8
256	Alpha-parvin OS=Mus musculus GN=Parva PE=1 SV=1	Alpha-parvin OS=Mus musculus GN=Parva PE=1 SV=1	DLAEDLYDGQVLQK-LESEKLNVAEVTQSEIAQK-LNVAEVTQSEIAQK-QIQEEITGNTEALSGR-TLITFVNK-VLIDWINDVLVGER-VLYNLFTK	7	7	7	>sp|Q9EPC1|PARVA_MOUSE Alpha-parvin OS=Mus musculus GN=Parva PE=1 SV=1	1	7	7	7	21.2	21.2	21.2	42.329	372	55.839	19.9	11.8	10.2	12.4	19.9	13.2	15.3	19.1	19.9	14	17.7	19.1	8.6	2.2	17.7	11.8	0	10.2	16.1	17.7	12.4	19.9	17.7	14				Q9EPC1	20139159	57342	Parva	Q9EPC1
257	Alpha-soluble NSF attachment protein OS=Mus musculus GN=Napa PE=1 SV=1; Beta-soluble NSF attachment protein OS=Mus musculus GN=Napb PE=1 SV=2	Alpha-soluble NSF attachment protein OS=Mus musculus GN=Napa PE=1 SV=1	AIDIYEQVGTSAMDSPLLK-IEEACEIYAR-LLEAHEEQNVDSYTEAVK-LLEAHEEQNVDSYTEAVKEYDSISR-NSQSFFSGLFGGSSK-TIQGDEEDLR-VAGYAAQLEQYQK-YEELFPAFSDSR-LDQWLTTMLLR	9;1	9;1	9;1	>sp|Q9DB05|SNAA_MOUSE Alpha-soluble NSF attachment protein OS=Mus musculus GN=Napa PE=1 SV=1	2	9	9	9	39	39	39	33.189	295	63.099	16.9	16.3	28.8	19.7	16.9	26.1	25.4	25.4	26.8	17.6	23.1	28.8	13.6	12.5	25.4	25.4	20.3	11.9	12.5	28.5	17.6	13.6	25.4	20.3		42	279	Q9DB05	17380315	108124	Napa	Q9DB05
258	Alpha-synuclein OS=Mus musculus GN=Snca PE=1 SV=2; Beta-synuclein OS=Mus musculus GN=Sncb PE=1 SV=1	Alpha-synuclein OS=Mus musculus GN=Snca PE=1 SV=2	EGVVHGVTTVAEK-EQVTNVGGAVVTGVTAVAQK-TKEQVTNVGGAVVTGVTAVAQK-TVEGAGNIAAATGFVK-TVEGAGNIAAATGFVKK-EGVLYVGSK	6;1	6;1	6;1	>sp|O55042|SYUA_MOUSE Alpha-synuclein OS=Mus musculus GN=Snca PE=1 SV=2	2	6	6	6	43.6	43.6	43.6	14.485	140	33.767	41.4	41.4	11.4	41.4	14.3	41.4	32.1	20.7	34.3	35	15.7	32.1	15.7	23.6	6.4	6.4	32.1	42.9	41.4	42.9	32.1	15.7	32.1	32.1				O55042	13432217	20617	Snca	O55042
259	Alpha-taxilin OS=Mus musculus GN=Txlna PE=2 SV=1	Alpha-taxilin OS=Mus musculus GN=Txlna PE=2 SV=1	EAGPEGAHGRPR-VQDLTAGGITDIGSER	2	2	2	>sp|Q6PAM1|TXLNA_MOUSE Alpha-taxilin OS=Mus musculus GN=Txlna PE=2 SV=1	1	2	2	2	5.1	5.1	5.1	62.368	554	3.6298	0	0	0	0	0	0	0	0	0	0	0	0	0	0	0	0	0	2.2	0	2.9	0	0	0	0				Q6PAM1	55583897	109658	Txlna	Q6PAM1
261	Amine oxidase [flavin-containing] A OS=Mus musculus GN=Maoa PE=1 SV=3	Amine oxidase [flavin-containing] A OS=Mus musculus GN=Maoa PE=1 SV=3	INVLVLEAR-NLPSVPGLLK-YVISAIPPVLTAK	3	3	3	>sp|Q64133|AOFA_MOUSE Amine oxidase [flavin-containing] A OS=Mus musculus GN=Maoa PE=1 SV=3	1	3	3	3	6.1	6.1	6.1	59.601	526	5.1445	4.4	6.1	1.9	4.2	4.4	6.1	4.4	6.1	2.5	4.4	4.4	6.1	1.9	0	0	0	4.4	4.4	4.4	1.9	1.9	4.4	4.4	6.1				Q64133	341940599	17161	Maoa	Q64133
262	Aminoacyl tRNA synthase complex-interacting multifunctional protein 1 OS=Mus musculus GN=Aimp1 PE=1 SV=2	Aminoacyl tRNA synthase complex-interacting multifunctional protein 1 OS=Mus musculus GN=Aimp1 PE=1 SV=2	EIEELKQELILAEIHNGVEQVR-GAEADQIIEYLK-ITFDAFPGEPDKELNPK-IWEQIQPDLHTNAECVATYK-KHPDADSLYVEEVDVGEAAPR-MVVLLCNLKPAK-QQSAAASTDSKPIDASR-VEILAPPNGSVPGDR	8	8	8	>sp|P31230|AIMP1_MOUSE Aminoacyl tRNA synthase complex-interacting multifunctional protein 1 OS=Mus musculus GN=Aimp1 PE=1 SV=2	1	8	8	8	43.9	43.9	43.9	33.997	310	77.412	19.7	30.6	24.8	31.6	21.9	16.5	21.3	33.5	15.5	19.7	26.5	14.8	3.9	14.8	19.7	14.2	0	12.3	23.5	43.9	26.5	14.8	14.8	19.7		209;282	204	P31230	17379579	---	Aimp1	P31230
263	Aminoacyl tRNA synthase complex-interacting multifunctional protein 2 OS=Mus musculus GN=Aimp2 PE=1 SV=2	Aminoacyl tRNA synthase complex-interacting multifunctional protein 2 OS=Mus musculus GN=Aimp2 PE=1 SV=2	DIVINANPASPPLSLLVLHR-DYGALKDIVINANPASPPLSLLVLHR-FLFSLFGQK-MIHTPDADLDVTNILQADEPTTLATNTLDLNSVLGK-SCENLAPFSTALQLLK-TTSPATDAGHVQETSEPSLQALESR	6	6	6	>sp|Q8R010|AIMP2_MOUSE Aminoacyl tRNA synthase complex-interacting multifunctional protein 2 OS=Mus musculus GN=Aimp2 PE=1 SV=2	1	6	6	6	35	35	35	35.377	320	24.86	18.8	10.6	16.9	10.6	18.8	10.6	10.6	18.8	18.8	10.9	18.8	16.9	2.8	7.8	10.6	18.8	0	18.8	7.8	35	9.1	10.6	10.6	10.6		306		Q8R010	341940202	231872	Aimp2	Q8R010
264	Aminoacylase-1 OS=Mus musculus GN=Acy1 PE=1 SV=1	Aminoacylase-1 OS=Mus musculus GN=Acy1 PE=1 SV=1	AVGIPALGFSPMNR-EGAVTSVNLTK-VISSILAFR	3	3	3	>sp|Q99JW2|ACY1_MOUSE Aminoacylase-1 OS=Mus musculus GN=Acy1 PE=1 SV=1	1	3	3	3	8.3	8.3	8.3	45.78	408	3.0977	2.7	4.9	0	2.2	4.9	2.2	2.2	4.9	2.2	2.7	0	2.2	0	5.6	2.2	2.2	0	0	0	2.2	0	2.7	2.2	2.7				Q99JW2	81880060	109652	Acy1	Q99JW2
265	Aminopeptidase B OS=Mus musculus GN=Rnpep PE=2 SV=2	Aminopeptidase B OS=Mus musculus GN=Rnpep PE=2 SV=2	AEFGPPGPGPGSR-AFFPCFDTPAVK-AYVDEFK-DTFAATASQLHSNVVNYVQQILAPK-GVDSIPGFEFDR-ISNAQNAELR-LFGPYVWGR-TYQLVYFLDK-VGEGPGVCWLAPEQTAGK-VKIEPGVDPDDTYNETPYEK-WGQIILK	11	11	11	>sp|Q8VCT3|AMPB_MOUSE Aminopeptidase B OS=Mus musculus GN=Rnpep PE=2 SV=2	1	11	11	11	22	22	22	72.415	650	29.791	16.2	10	7.8	10.8	11.4	14.5	9.4	11.4	7.5	14.2	8.3	8	7.5	13.2	10.3	9.1	13.4	10.6	14.8	16.9	13.5	5.1	10.3	13.1		151;181		Q8VCT3	341940212	215615	Rnpep	Q8VCT3
266	Aminopeptidase N OS=Mus musculus GN=Anpep PE=1 SV=4	Aminopeptidase N OS=Mus musculus GN=Anpep PE=1 SV=4	ALEQALEK-AQIIHDSFNLASAK-ESSLVFDSQSSSISNK-KQDTTSTIISIASNVAGHPLVWDFVR-LFENYGGGSFSFANLIQGVTR-LQNQLQTDLSVIPVINR-TLDGTPAPNIDKTELVER-TLIPDSYR-YLSYTLNPDYIR	9	9	9	>sp|P97449|AMPN_MOUSE Aminopeptidase N OS=Mus musculus GN=Anpep PE=1 SV=4	1	9	9	9	14.5	14.5	14.5	109.65	966	23.751	7.3	7.6	3.9	3	4.8	5.2	9.8	6.7	6.3	3.7	5.6	6.3	2.1	1.2	6.1	6.7	5.2	7	8	9	3.9	5.6	8.3	7.6				P97449	31077182	16790	Anpep	P97449
267	AMP deaminase 2 OS=Mus musculus GN=Ampd2 PE=1 SV=1	AMP deaminase 2 OS=Mus musculus GN=Ampd2 PE=1 SV=1	WLVQVPR-YLQQLAEKPLETR	2	2	2	>sp|Q9DBT5|AMPD2_MOUSE AMP deaminase 2 OS=Mus musculus GN=Ampd2 PE=1 SV=1	1	2	2	2	2.5	2.5	2.5	92.023	798	3.6825	0	1.6	0	0	1.6	0	1.6	0	0	0.9	0	1.6	0	0	1.6	1.6	0	0	1.6	0	1.6	0	0	1.6				Q9DBT5	81881767	109674	Ampd2	Q9DBT5
268	Amyloid beta A4 precursor protein-binding family B member 1-interacting protein OS=Mus musculus GN=Apbb1ip PE=1 SV=2	Amyloid beta A4 precursor protein-binding family B member 1-interacting protein OS=Mus musculus GN=Apbb1ip PE=1 SV=2	ASGIYYVPK-DVLDNLFEK-NPQNFYLDNK-TLYDNYQR-VFEDHENVVEVLSDWTR	5	5	5	>sp|Q8R5A3|AB1IP_MOUSE Amyloid beta A4 precursor protein-binding family B member 1-interacting protein OS=Mus musculus GN=Apbb1ip PE=1 SV=2	1	5	5	5	7.9	7.9	7.9	74.318	670	11.961	4.2	5.4	5.4	5.2	5.4	3.9	4	6.4	2.8	3.9	6.6	6.7	4.2	3.9	1.5	5.1	3.9	1.3	6.4	6.7	1.3	5.4	3.9	1.3				Q8R5A3	82592601	54519	Apbb1ip	Q8R5A3
269	Anamorsin OS=Mus musculus GN=Ciapin1 PE=1 SV=1	Anamorsin OS=Mus musculus GN=Ciapin1 PE=1 SV=1	EALSPEEVQSVQEHLGYHSDSLR-ESSFDVILSGVVPGSTSLHSAEVLAEMAR-LQELTGSEGQVFMENVTQLLQSSHK-SSSVKPVVDPAAAK	4	4	4	>sp|Q8WTY4|CPIN1_MOUSE Anamorsin OS=Mus musculus GN=Ciapin1 PE=1 SV=1	1	4	4	4	29.4	29.4	29.4	33.429	309	9.6568	4.5	12	4.5	12	4.5	4.5	4.5	12	4.5	12	4.5	4.5	0	0	0	12.6	0	0	12	29.4	4.5	12	7.4	4.5				Q8WTY4	57012707	109006	Ciapin1	Q8WTY4
271	Angiotensinogen OS=Mus musculus GN=Agt PE=1 SV=1	Angiotensinogen OS=Mus musculus GN=Agt PE=1 SV=1	HSFVQSLALFTPALFPR-LTLPQLEIR-SLDLSTDPVLATEK-VGEVLNSILLELK	4	4	4	>sp|P11859|ANGT_MOUSE Angiotensinogen OS=Mus musculus GN=Agt PE=1 SV=1	1	4	4	4	11.1	11.1	11.1	51.99	477	11.027	1.9	1.9	0	1.9	2.7	8.2	4.6	8.2	2.9	1.9	2.9	8.2	0	0	1.9	11.1	0	1.9	11.1	11.1	0	7.5	6.3	8.2				P11859	113881	---	Agt	P11859
272	Anionic trypsin-2 OS=Mus musculus GN=Prss2 PE=2 SV=1	Anionic trypsin-2 OS=Mus musculus GN=Prss2 PE=2 SV=1	HPNYNSWTLDNDIMLIK-LASPVTLNAR-LGEHNINVLEGNEQFVDSAK-VCNYVDWIQNTIADN	4	4	4	>sp|P07146|TRY2_MOUSE Anionic trypsin-2 OS=Mus musculus GN=Prss2 PE=2 SV=1	1	4	4	4	25.2	25.2	25.2	26.203	246	278.44	12.2	12.2	25.2	0	12.2	25.2	25.2	19.1	0	25.2	18.3	0	4.1	19.1	25.2	12.2	0	0	12.2	8.1	12.2	12.2	25.2	25.2		233	109	P07146	136428	22072	Prss2	P07146
273	Ankycorbin OS=Mus musculus GN=Rai14 PE=1 SV=1	Ankycorbin OS=Mus musculus GN=Rai14 PE=1 SV=1	ESVFFAEAPFK-LSENAGIQNLLLSK	2	2	2	>sp|Q9EP71|RAI14_MOUSE Ankycorbin OS=Mus musculus GN=Rai14 PE=1 SV=1	1	2	2	2	2.6	2.6	2.6	108.85	979	3.6944	1.1	0	1.4	0	1.4	0	1.4	0	1.4	0	0	0	0	0	1.4	0	0	0	1.4	1.4	0	0	1.4	0				Q9EP71	81906198	75646	Rai14	Q9EP71
274	Ankyrin repeat and FYVE domain-containing protein 1 OS=Mus musculus GN=Ankfy1 PE=2 SV=2	Ankyrin repeat and FYVE domain-containing protein 1 OS=Mus musculus GN=Ankfy1 PE=2 SV=2	ANALHATNNLQIIPDFSLK-FQLQLLR-GDLFASTFLIK-HGLANLTAELLQQGANPNLQTEEALPVPK-LGVNNNQGVNIFNYQVATK-LNETDHNGDLALDLALSR-NGALVNAATAGAQETPLHLVALYSPK-NLLLAGAK-TQDGETALQLAIK	9	9	9	>sp|Q810B6|ANFY1_MOUSE Ankyrin repeat and FYVE domain-containing protein 1 OS=Mus musculus GN=Ankfy1 PE=2 SV=2	1	9	9	9	12.8	12.8	12.8	128.65	1169	21.766	8.1	5.9	8.1	8.4	6.5	8	7.9	6.4	8.4	6.2	5.6	9.7	3.8	0.6	4.7	9.5	10.5	1.6	6.9	6.9	3.3	3.8	9.7	8				Q810B6	341940217	11736	Ankfy1	Q810B6
275	Ankyrin repeat domain-containing protein 13A OS=Mus musculus GN=Ankrd13a PE=1 SV=2; Ankyrin repeat domain-containing protein 13D OS=Mus musculus GN=Ankrd13d PE=2 SV=2	Ankyrin repeat domain-containing protein 13A OS=Mus musculus GN=Ankrd13a PE=1 SV=2	LTSPVINTSLDTK-VYSVNNVSVITR-WEFTSWVPLVSR-IEIPLFHVLNAR	4;1	4;1	4;1	>sp|Q80UP5|AN13A_MOUSE Ankyrin repeat domain-containing protein 13A OS=Mus musculus GN=Ankrd13a PE=1 SV=2	2	4	4	4	8.3	8.3	8.3	67.177	588	9.4752	6.3	6.3	6.3	8.3	2	4.3	4.3	8.3	6.3	2	0	4.3	2.2	0	4.3	2	6.3	4.3	4.3	6.3	6.3	2	6.3	2.2				Q80UP5	50400455	68420	Ankrd13a	Q80UP5
276	Ankyrin-1 OS=Mus musculus GN=Ank1 PE=1 SV=2	Ankyrin-1 OS=Mus musculus GN=Ank1 PE=1 SV=2	ADAATSFLR-DSGEGDTTSLR-DSSREPGGFLSFLR-EGHVDTALALLEK-EHLGLSWAELAR-EIILETTTK-ELQFSVEDINR-ELVNYGANVNAQSQK-EPGGFLSFLR-FLLQHQADVNAK-GASVNFTPQNGITPLHIASR-IIALGPTGAQFLSPVIVEIPHFASHGR-IITTDFPLYFVIMSR-ISEILLDHGAPIQAK-ITTIQGPEPGALQEYEQVLVSTR-LALQAQPVPDELVTK-LDQVVESPAIPR-LGYISVTDVLK-LLGNQATFSPIVTVEPR-LLLENGASPNLATTAGHTPLHTAAR-LNTPPPLAEEEGLASR-LVPLVQATFPENAVTK-NGASPNEVSSNGTTPLAIAK-QGSTAVHPQEATQSSWQEEVTQGPHSFQ…	32	32	32	>sp|Q02357|ANK1_MOUSE Ankyrin-1 OS=Mus musculus GN=Ank1 PE=1 SV=2	1	32	32	32	25.9	25.9	25.9	204.22	1862	89.524	3.5	14.4	15.6	11.8	14	16.5	16.1	15.6	9.5	15	18.5	12.8	8.5	4.8	14.1	20.8	18.1	8.6	13.8	18.5	11.6	15.1	22.6	15.6				Q02357	97535655	11733	Ank1	Q02357
277	Annexin A1 OS=Mus musculus GN=Anxa1 PE=1 SV=2	Annexin A1 OS=Mus musculus GN=Anxa1 PE=1 SV=2	AAYLQENGKPLDEVLR-AAYLQENGKPLDEVLRK-ALDLELK-ALDLELKGDIEK-ALTGHLEEVVLAMLK-ALYEAGER-CATSTPAFFAEK-CLTTIVK-CQDLSVNQDLADTDAR-DITSDTSGDFR-DITSDTSGDFRK-FLENQEQEYVQAVK-GGPGSAVSPYPSFNVSSDVAALHK-GLGTDEDTLIEILTTR-GTDVNVFTTILTSR-GVDEATIIDILTK-GVDEATIIDILTKR-ILVALCGGN-KGTDVNVFTTILTSR-SEIDMNEIK-SYKGGPGSAVSPYPSFNVSSDVAALHK-TPAQFDADELR-TPAQFDADELRGAMK-VFQNYGK-YGISLCQAILDETKGDYEK-ALLALAK	26	26	25	>sp|P10107|ANXA1_MOUSE Annexin A1 OS=Mus musculus GN=Anxa1 PE=1 SV=2	1	26	26	25	72.5	72.5	70.5	38.734	346	323.31	61.3	69.7	59.5	61.8	67.1	72.5	50.3	57.8	50.3	70.5	63.3	70.5	39.3	45.4	54.9	51.7	24.9	53.8	60.1	72.5	54.3	54.9	64.7	66.8		189;263;270;324;343	111;127;308	P10107	113945	16952	Anxa1	P10107
278	Annexin A11 OS=Mus musculus GN=Anxa11 PE=1 SV=2	Annexin A11 OS=Mus musculus GN=Anxa11 PE=1 SV=2	AHLVAVFNEYQR-DVQELYAAGENR-GAGTDEACLIEIFASR-GFGTDEQAIIDCLGSR-GTITAASGFDPLRDAEVLR-NTPAFFAER-QQILLSFK-SELDLLDIR-SELSGNFEK-TLEEAIR-TPVLFDVYEIK	11	11	11	>sp|P97384|ANX11_MOUSE Annexin A11 OS=Mus musculus GN=Anxa11 PE=1 SV=2	1	11	11	11	25.4	25.4	25.4	54.079	503	52.602	16.7	7.4	13.5	10.7	19.1	19.1	13.5	14.9	16.3	20.5	14.7	13.9	14.3	5.6	9.7	7.8	11.1	22.3	15.9	12.5	17.3	15.7	10.3	17.3		224;292		P97384	341940228	11744	Anxa11	P97384
279	Annexin A2 OS=Mus musculus GN=Anxa2 PE=1 SV=2	Annexin A2 OS=Mus musculus GN=Anxa2 PE=1 SV=2	AEDGSVIDYELIDQDAR-ALLYLCGGDD-DALNIETAVK-DIISDTSGDFR-ELPSALK-ELYDAGVK-GLGTDEDSLIEIICSR-GVDEVTIVNILTNR-LMVALAK-LSLEGDHSTPPSAYGSVKPYTNFDAER-LSLEGDHSTPPSAYGSVKPYTNFDAERDALNIETAVK-QDIAFAYQR-RAEDGSVIDYELIDQDAR-SALSGHLETVILGLLK-SEVDMLK-SLYYYIQQDTK-SLYYYIQQDTKGDYQK-SYSPYDMLESIK-TDLEKDIISDTSGDFR-TKGVDEVTIVNILTNR-TNQELQEINR-TPAQYDASELK-WISIMTER	23	23	22	>sp|P07356|ANXA2_MOUSE Annexin A2 OS=Mus musculus GN=Anxa2 PE=1 SV=2	1	23	23	22	66.1	66.1	64	38.676	339	323.31	59.6	59.3	51.6	59.6	63.1	64	54.6	50.7	56.3	59.6	59	57.5	38.6	46	56	51.6	34.8	46.6	49.3	55.2	52.2	54.9	48.4	51.9		133;335	171;217;240;300	P07356	113951	12306	Anxa2	P07356
280	Annexin A3 OS=Mus musculus GN=Anxa3 PE=1 SV=4	Annexin A3 OS=Mus musculus GN=Anxa3 PE=1 SV=4	ALLTLADGR-DAQILYNAGENK-DYPGFSPSVDAEAIR-EISQAYYTVYK-GTGTDEDALIEILTTR-GTIKDYPGFSPSVDAEAIR-HYGYSLYSAIQSDTSGDYR-KDAQILYNAGENK-LTFDEYR-NTPAFLAER-SLGDDISSETSGDFR-SLGDDISSETSGDFRK-TLINILTER	13	13	13	>sp|O35639|ANXA3_MOUSE Annexin A3 OS=Mus musculus GN=Anxa3 PE=1 SV=4	1	13	13	13	39.6	39.6	39.6	36.384	323	71.51	28.8	35.6	31.9	28.8	31.3	31.6	27.6	23.8	33.4	28.8	37.2	35.6	21.4	24.1	27.2	17	24.8	22.9	22	28.8	26.9	25.4	28.8	20.1				O35639	341940624	11745	Anxa3	O35639
281	Annexin A4 OS=Mus musculus GN=Anxa4 PE=2 SV=4	Annexin A4 OS=Mus musculus GN=Anxa4 PE=2 SV=4	AASGFNATEDAQTLR-AASGFNATEDAQTLRK-DIEQSIK-FLSILCSR-GAGTDEGCLIEILASR-GLGTDDNTLIR-GLGTDEDAIIGILAYR-INQTYQQQYGR-QDAQELYEAGEKR-SETSGSFEDALLAIVK-SLYSFIK-VLLVLCGGDD-VLVSLSAAGR	13	13	13	>sp|P97429|ANXA4_MOUSE Annexin A4 OS=Mus musculus GN=Anxa4 PE=2 SV=4	1	13	13	13	44.2	44.2	44.2	35.915	319	119.14	40.8	32.9	37	34.5	27	27.6	12.2	25.4	37.9	36.4	37.9	36.1	32.6	29.8	37.9	37	31.3	39.8	37	35.7	30.4	32.9	38.9	33.5		108;198;315		P97429	341940625	11746	Anxa4	P97429
282	Annexin A5 OS=Mus musculus GN=Anxa5 PE=1 SV=1	Annexin A5 OS=Mus musculus GN=Anxa5 PE=1 SV=1	ADAEVLR-ALLLLCGGEDD-DLVDDLK-DLVDDLKSELTGK-DPDTAIDDAQVELDAQALFQAGELK-ETSGNLEQLLLAVVK-FITIFGTR-GAGTDDHTLIR-GLGTDEDSILNLLTSR-GTVTDFPGFDGR-GTVTDFPGFDGRADAEVLR-KNFATSLYSMIK-LIVAMMKPSR-LYDAYELK-NFATSLYSMIK-QEIAQEFK-QVYEEEYGSNLEDDVVGDTSGYYQR-SEIDLFNIR-SEIDLFNIRK-SIPAYLAETLYYAMK-TPEELSAIK-VLTEIIASR-WGTDEEKFITIFGTR-YMTISGFQIEETIDR	24	24	24	>sp|P48036|ANXA5_MOUSE Annexin A5 OS=Mus musculus GN=Anxa5 PE=1 SV=1	1	24	24	24	77.1	77.1	77.1	35.752	319	323.31	66.1	58.9	45.1	53	60.8	57.7	53.3	53.6	53.9	50.5	52.7	57.7	50.8	48.6	64.3	61.1	44.8	58.6	52.4	69.9	50.2	41.4	57.4	50.8		314	82;83;257;297	P48036	1351942	11747	Anxa5	P48036
283	Annexin A6 OS=Mus musculus GN=Anxa6 PE=1 SV=3	Annexin A6 OS=Mus musculus GN=Anxa6 PE=1 SV=3	ALLALCGGED-AMEGAGTDEKTLIEILATR-CLIEILASR-DAFVAIVQSVK-DAISGVGTDEK-DAYERDLESDIIGDTSGHFQK-DLESDIIGDTSGHFQK-DLIEDLKYELTGK-DLMADLKSEISGDLAR-DQAQEDAQVAAEILEIADTPSGDK-DQAQEDAQVAAEILEIADTPSGDKTSLETR-EEGGENRDQAQEDAQVAAEILEIADTPSGDK-EIKDAISGVGTDEK-EMSGDVKDAFVAIVQSVK-ENDDVVSEDLVQQDVQDLYEAGELK-ESILELITSR-FMTVLCTR-GELSGDFEK-GFGSDKESILELITSR-GIGTDEATIIDIVTHR-GSVHDFPEFDANQDAEALYTAMK-GTVCAANDFNPDADAK-IAQGAMYR-IL…	42	42	42	>sp|P14824|ANXA6_MOUSE Annexin A6 OS=Mus musculus GN=Anxa6 PE=1 SV=3	1	42	42	42	68.9	68.9	68.9	75.884	673	323.31	54.1	39.8	42.6	44.3	56.6	49.2	51.7	54.8	44.1	45.8	46.2	52.6	52.3	36.4	40.6	40.9	52.7	49.6	55.7	58.5	52.5	52.3	58.4	48.3		59;114;321;358;552;669	9;33;127;157;242;286;433;434;548;582	P14824	341940596	11749	Anxa6	P14824
284	Annexin A7 OS=Mus musculus GN=Anxa7 PE=2 SV=2	Annexin A7 OS=Mus musculus GN=Anxa7 PE=2 SV=2	CYQLEFGR-DLLSSVSR-EFSGYVESGLK-GAGTDDSTLVR-GFGTDEQAIVDVVSNR-LLLAIVGQ-QSVNHQMAQEDAQR-SEIDLVQIK-TILQCALNRPAFFAER-VLIEILCTR	10	10	10	>sp|Q07076|ANXA7_MOUSE Annexin A7 OS=Mus musculus GN=Anxa7 PE=2 SV=2	1	10	10	10	23.8	23.8	23.8	49.925	463	47.432	18.6	13.6	17.3	9.7	17.3	16.6	11.4	15.3	16.8	17.3	20.3	13.6	13.6	8.6	13.8	20.7	1.7	15.6	12.1	21.4	15.3	15.6	13.8	15.6		260;273;388	316	Q07076	341940235	11750	Anxa7	Q07076
285	Anoctamin-6 OS=Mus musculus GN=Ano6 PE=1 SV=1	Anoctamin-6 OS=Mus musculus GN=Ano6 PE=1 SV=1	FVGYPGDPVYLLGK-IVYFILSR-MNDFYILDR-VNESVIKPEQEFFTAPFEK	4	4	4	>sp|Q6P9J9|ANO6_MOUSE Anoctamin-6 OS=Mus musculus GN=Ano6 PE=1 SV=1	1	4	4	4	5.5	5.5	5.5	106.25	911	5.6352	0	0	0.9	0	2.1	3.6	0	2.1	2.1	0	5.5	0	1.5	0	0.9	3	0	1.5	0	0	1.5	4.5	3	0.9				Q6P9J9	78103354	105722	Ano6	Q6P9J9
286	Antigen peptide transporter 1 OS=Mus musculus GN=Tap1 PE=2 SV=3	Antigen peptide transporter 1 OS=Mus musculus GN=Tap1 PE=2 SV=3	ELAAWGTLR-GLVEFQDVSFAYPNQPK-ITDWILQDK-KPLLLILDDATSALDAGNQLR-LGSLWAPSGNR-QETGFFLK-SFANEEGEAQK-VQVLQGLTFTLHPGTVTALVGPNGSGK-VWVVGLSR-WAILGLGVR	10	10	10	>sp|P21958|TAP1_MOUSE Antigen peptide transporter 1 OS=Mus musculus GN=Tap1 PE=2 SV=3	1	10	10	10	18	18	18	78.863	724	16.493	3.6	1.1	9.1	7.5	2.3	7.3	3.6	6.4	4.8	11.6	7.6	10.4	7.3	4	7.7	15.2	4.7	6.5	0	1.2	10.2	2.3	12.8	10.2				P21958	338817982	21354	Tap1	P21958
287	Antigen peptide transporter 2 OS=Mus musculus GN=Tap2 PE=2 SV=1	Antigen peptide transporter 2 OS=Mus musculus GN=Tap2 PE=2 SV=1	ALVGGTASTSVVR-DGQDVYAHLVQQR-DLEKDVYLVIR-DNIAYGLR-EAVGGLQTVR-KPNLPQPGILAPPWLEGR-LHTVQNADQVLVLK-LTFLSLLDLPLTIAAEK-QDLGFFQETK-QVVLVGQEPVLFSGSVK-VFSYLDR-WLPFNANILLR	12	12	12	>sp|P36371|TAP2_MOUSE Antigen peptide transporter 2 OS=Mus musculus GN=Tap2 PE=2 SV=1	1	12	12	12	21.2	21.2	21.2	77.444	702	43.519	8.8	2.4	16.8	15	11	14.4	10.1	8.5	16.4	18.5	18.2	10.3	9.8	8.4	12.7	15.4	6.7	13.8	12.4	1.6	6.8	17.8	18.7	12.1				P36371	549045	21355	Tap2	P36371
288	Antithrombin-III OS=Mus musculus GN=Serpinc1 PE=1 SV=1;CON__P41361	Antithrombin-III OS=Mus musculus GN=Serpinc1 PE=1 SV=1	ANRPFLVLIR-ATEEDGSEQKVPEATNR-DIPVNPLCIYR-DVIPQGAINELTALVLVNTIYFK-EQLQDMGLIDLFSPEK-LQPLDFKENPEQSR-NDNDNIFLSPLSISTAFAMTK-SQLPGIVAGGR-SQLPGIVAGGRDDLYVSDAFHK-SSDLVSANR-VAEGTQVLELPFKGDDITMVLILPKPEK-EVALNTIIFMGR-FDTISEK-LQPLDFK-TSDQIHFFFAK	15;4	15;4	15;4	>sp|P32261|ANT3_MOUSE Antithrombin-III OS=Mus musculus GN=Serpinc1 PE=1 SV=1	2	15	15	15	43.2	43.2	43.2	52.003	465	125.13	33.3	11.8	13.5	14.6	17.8	21.9	13.3	17.8	18.1	17.8	3.9	19.4	19.4	8.4	6.2	19.4	17	6.5	17	32.9	15.7	26	31.4	23		54	371;456	P32261	416621	11905	Serpinc1	P32261
289	AP-1 complex subunit beta-1 OS=Mus musculus GN=Ap1b1 PE=2 SV=2	AP-1 complex subunit beta-1 OS=Mus musculus GN=Ap1b1 PE=2 SV=2	DIANENEAQFQIR-DLDYYATLLK-GLEISGTFTR-IQPGNPSFTLSLK-KLAPPLVTLLSAEPELQYVALR-KPTETQELVQQVLSLATQDSDNPDLR-KPTETQELVQQVLSLATQDSDNPDLRDR-LAPPLVTLLSAEPELQYVALR-LGAPISSGLSDLFDLTSGVGTLSGSYVAPK-LHDINAQLVEDQGFLDTLK-LLSTDPVAAK-LQSSNIFTVAK-LTNGIWVLAELR-VNYVVQEAIVVIK	23	14	14	>sp|O35643|AP1B1_MOUSE AP-1 complex subunit beta-1 OS=Mus musculus GN=Ap1b1 PE=2 SV=2	1	23	14	14	30.1	20.3	20.3	103.93	943	194.29	26.3	17.5	20.1	19.9	22.9	12.6	23	21.3	20.1	19.4	17.6	17.7	15.4	7.1	18.7	24.9	17.7	11.7	12.7	24.6	17.5	16.9	26.3	22.3		391	74;448	O35643	341940229	11764	Ap1b1	O35643
290	AP-1 complex subunit gamma-1 OS=Mus musculus GN=Ap1g1 PE=1 SV=3	AP-1 complex subunit gamma-1 OS=Mus musculus GN=Ap1g1 PE=1 SV=3	AVEYNALFK-ELLYFLDSCEPEFK-NVGNAILYETVLTIMDIK-TFQLQLLSPSSSVVPAFNTGTITQVIK-VLAINILGR-VLTTAGSYVR-YVALTSLLK	7	7	7	>sp|P22892|AP1G1_MOUSE AP-1 complex subunit gamma-1 OS=Mus musculus GN=Ap1g1 PE=1 SV=3	1	7	7	7	11.7	11.7	11.7	91.349	822	16.154	8.9	4.5	6.6	6.6	4.5	7.8	9.5	7.8	5.5	5.6	2.2	6.6	6.7	4.5	6.6	6.7	6.7	4.5	2.2	7.7	3.4	6.7	8.9	6.6		392		P22892	113349	11765	Ap1g1	P22892
291	AP-1 complex subunit gamma-like 2 OS=Mus musculus GN=Ap1g2 PE=2 SV=2	AP-1 complex subunit gamma-like 2 OS=Mus musculus GN=Ap1g2 PE=2 SV=2	DDAVANLTQLIGEAEELHTYSVR-YVALTSLLQLVQSDHSAVQR	2	2	2	>sp|O88512|AP1G2_MOUSE AP-1 complex subunit gamma-like 2 OS=Mus musculus GN=Ap1g2 PE=2 SV=2	1	2	2	2	5.4	5.4	5.4	87.862	791	2.9989	2.9	0	2.9	2.9	0	0	0	2.9	5.4	0	0	0	0	0	0	2.9	2.5	0	0	2.9	0	0	2.9	2.9				O88512	341940230	11766	Ap1g2	O88512
292	AP-1 complex subunit mu-1 OS=Mus musculus GN=Ap1m1 PE=1 SV=3; AP-1 complex subunit mu-2 OS=Mus musculus GN=Ap1m2 PE=1 SV=3	AP-1 complex subunit mu-1 OS=Mus musculus GN=Ap1m1 PE=1 SV=3	FEIPYFTTSGIQVR-LETGAPRPPATVTNAVSWR-SEIVGSIK-STANNVEIHIPVPNDADSPK-VLFDNTGR-VVQVFSEYFK-WVPENSEIVWSVK-YITQNGDYQLR-SGYQALPWVR	9;1	9;1	9;1	>sp|P35585|AP1M1_MOUSE AP-1 complex subunit mu-1 OS=Mus musculus GN=Ap1m1 PE=1 SV=3	2	9	9	9	26.7	26.7	26.7	48.542	423	20.733	9.9	9.5	5.2	14.7	14.4	16.8	15.4	19.9	17.5	15.1	16.8	21.7	19.9	13.5	19.1	12.1	0	12.3	24.1	10.6	12.3	13.5	19.1	3.8				P35585	543817	11767	Ap1m1	P35585
293	AP-2 complex subunit alpha-1 OS=Mus musculus GN=Ap2a1 PE=1 SV=1	AP-2 complex subunit alpha-1 OS=Mus musculus GN=Ap2a1 PE=1 SV=1	ATIQGVLR-DFLTPPLLSVR-DTSSNDINGGVEPTPSTVSTPSPSADLLGLR-FINLFPETK-IVSSASTDLQDYTYYFVPAPWLSVK-LLGFGSALLDNVDPNPENFVGAGIIQTK-NSGVLFENQLLQIGVK-QLSLPLQEAQK-TSVQFQNFLPTVVHPGDLQTQLAVQTK-YGGTAQSLTLK-ACNQLGQFLQHR-ALLLSTYIK-DDVQGYAAK-GLAVFISDIR-IAGDYVSEEVWYR-NADVELQQR-QSAALCLLR-VAILAEK-VGGYILGEFGNLIAGDPR	19	19	10	>sp|P17426|AP2A1_MOUSE AP-2 complex subunit alpha-1 OS=Mus musculus GN=Ap2a1 PE=1 SV=1	1	19	19	10	27.9	27.9	18.1	107.66	977	54.176	21.3	15.9	12.6	11.9	13.2	10.6	20.2	15	15.7	7.4	6.8	13.9	8.1	4.7	8.3	20.4	11.5	5.6	9.1	24.1	15.6	6.9	17.6	13.9		171;331		P17426	113334	11771	Ap2a1	P17426
294	AP-2 complex subunit alpha-2 OS=Mus musculus GN=Ap2a2 PE=1 SV=2	AP-2 complex subunit alpha-2 OS=Mus musculus GN=Ap2a2 PE=1 SV=2	FVNLFPEVK-IIGFGSALLEEVDPNPANFVGAGIIHTK-IVTSASTDLQDYTYYFVPAPWLSVK-LPITLNK-NNGVLFENQLLQIGLK-QLSNPQQEVQNIFK-VIQIVINRDDVQGYAAK-YGGTFQNVSVK	17	8	8	>sp|P17427|AP2A2_MOUSE AP-2 complex subunit alpha-2 OS=Mus musculus GN=Ap2a2 PE=1 SV=2	1	17	8	8	22.8	13.5	13.5	104.02	938	49.154	17.2	5.4	9.8	6.7	13.2	15	13.1	11	14.6	10.7	5	10.1	6.5	9.6	6.6	16.4	10.9	4.7	13.9	18.3	8.3	11.1	13.4	17.7		171;330		P17427	341940231	11772	Ap2a2	P17427
295	AP-2 complex subunit beta OS=Mus musculus GN=Ap2b1 PE=1 SV=1	AP-2 complex subunit beta OS=Mus musculus GN=Ap2b1 PE=1 SV=1	APEVSQYIYQVYDSILKN-AVWLPAVK-DIPNENELQFQIK-FLELLPK-IQPGNPNYTLSLK-KLAPPLVTLLSGEPEVQYVALR-KPSETQELVQQVLSLATQDSDNPDLR-KPSETQELVQQVLSLATQDSDNPDLRDR-LAPPLVTLLSGEPEVQYVALR-LLSTDPVTAK-LQNNNVYTIAK-LTNGIWILAELR-QVFLATWK-VNYVVQEAIVVIR-VNYVVQEAIVVIRDIFR-YPNKYESIIATLCENLDSLDEPDAR-AAMIWIVGEYAER-CVSTLLDLIQTK-EYATEVDVDFVR-LASQANIAQVLAELK-LASQANIAQVLAELKEYATEVDVDFVR-LSHANSAVVLSAVK-LVYLYLMNYAK-NINLIVQK-YNDPIYVK	25	25	16	>sp|Q9DBG3|AP2B1_MOUSE AP-2 complex subunit beta OS=Mus musculus GN=Ap2b1 PE=1 SV=1	1	25	25	16	30.4	30.4	20.5	104.58	937	130.05	25.5	17.3	20.3	18.5	16.3	16.2	22.4	20.3	17	17.7	12.5	17.2	13	9.4	17.5	20.8	17.7	12.9	16.6	23.6	14.8	21.7	23.6	20.9		391;433	74;448	Q9DBG3	51701351	71770	Ap2b1	Q9DBG3
296	AP-2 complex subunit mu OS=Mus musculus GN=Ap2m1 PE=1 SV=1	AP-2 complex subunit mu OS=Mus musculus GN=Ap2m1 PE=1 SV=1	SNIWLAAVTK-SPVTNIAR-TFITQQGIK-WARPPISMNFEVPFAPSGLK	4	4	4	>sp|P84091|AP2M1_MOUSE AP-2 complex subunit mu OS=Mus musculus GN=Ap2m1 PE=1 SV=1	1	4	4	4	10.8	10.8	10.8	49.654	435	7.7593	0	1.8	0	3.9	3.9	3.9	6.2	6.2	1.8	3.9	1.8	3.9	0	0	3.9	6.7	0	0	1.8	3.9	3.9	1.8	3.9	3.9			388	P84091	51316977	11773	Ap2m1	P84091
297	AP2-associated protein kinase 1 OS=Mus musculus GN=Aak1 PE=1 SV=2	AP2-associated protein kinase 1 OS=Mus musculus GN=Aak1 PE=1 SV=2	AGQTQPNPGILPIQPALTPR-ATVQPLPQAAGPSNQPGLLPSVSQPK	2	2	2	>sp|Q3UHJ0|AAK1_MOUSE AP2-associated protein kinase 1 OS=Mus musculus GN=Aak1 PE=1 SV=2	1	2	2	2	4.8	4.8	4.8	103.35	959	5.0009	2.1	2.1	0	2.7	4.8	4.8	2.1	2.7	2.7	0	4.8	2.1	4.8	2.1	4.8	0	2.1	4.8	0	2.1	0	4.8	2.1	0				Q3UHJ0	115503759	269774	Aak1	Q3UHJ0
298	AP-3 complex subunit beta-1 OS=Mus musculus GN=Ap3b1 PE=1 SV=2; AP-3 complex subunit beta-2 OS=Mus musculus GN=Ap3b2 PE=1 SV=2	AP-3 complex subunit beta-1 OS=Mus musculus GN=Ap3b1 PE=1 SV=2	EASADLSPYVR-EFQTYVR-FQLGTLSHTLNIK-GLAAHYCFPR-LLDSITVPVAR-LLTQYILNLGK-LQILNLAAK-NASELFPAVVK-TVIGSVLLR-VVNVANLGAVPSSQDNVHR-YAEEQQDLALLSISTFQR	11;1	11;1	11;1	>sp|Q9Z1T1|AP3B1_MOUSE AP-3 complex subunit beta-1 OS=Mus musculus GN=Ap3b1 PE=1 SV=2	2	11	11	11	11.7	11.7	11.7	122.74	1105	17.139	5.3	4.3	3.4	3.2	2.7	6.2	4	4.3	3.3	5.2	6.2	3.6	3.5	1	2	3.6	2.7	2.7	2.7	5.3	0	1	6.2	3.6				Q9Z1T1	341940233	11774	Ap3b1	Q9Z1T1
299	AP-3 complex subunit delta-1 OS=Mus musculus GN=Ap3d1 PE=1 SV=1	AP-3 complex subunit delta-1 OS=Mus musculus GN=Ap3d1 PE=1 SV=1	EQAADTEAAQEVTQLLVER-GVPVAEEVSALFAGELNPVAPK-KQEQANNPFYIK-LFGALTPLEPR-NYLSLAPLFFK-VTTLPGHIQAVYVQNVVK	6	6	6	>sp|O54774|AP3D1_MOUSE AP-3 complex subunit delta-1 OS=Mus musculus GN=Ap3d1 PE=1 SV=1	1	6	6	6	7.8	7.8	7.8	135.08	1199	7.347	5.3	3.1	4.3	4.3	4.9	4.9	4.3	5.8	1.8	1.8	5.8	2.4	3.4	1.8	2.8	4.3	1.8	1.8	4.9	6.8	2.4	3.3	6.8	5.8				O54774	81882150	11776	Ap3d1	O54774
300	AP-3 complex subunit mu-1 OS=Mus musculus GN=Ap3m1 PE=1 SV=1; AP-3 complex subunit mu-2 OS=Mus musculus GN=Ap3m2 PE=2 SV=1	AP-3 complex subunit mu-1 OS=Mus musculus GN=Ap3m1 PE=1 SV=1	FDITIGPK-GLVNLQSGAPKPEENPNLNIQFK-VLAWDVGK-VSSQNLVAIPVYVK-ELIKPPTILR-IQQLAISGLK-YTNNEAYFDVVEEIDAIIDK	7;3	7;3	7;3	>sp|Q9JKC8|AP3M1_MOUSE AP-3 complex subunit mu-1 OS=Mus musculus GN=Ap3m1 PE=1 SV=1	2	7	7	7	22.2	22.2	22.2	46.936	418	14.67	1.9	11.2	5.7	5.7	8.1	16	16	13.2	18.4	11.2	8.1	8.1	12.2	5.7	7.9	10.5	0	5.7	13.6	15.1	0	13.6	20.3	12.4				Q9JKC8	20531985	55946	Ap3m1	Q9JKC8
301	AP-3 complex subunit sigma-1 OS=Mus musculus GN=Ap3s1 PE=1 SV=2	AP-3 complex subunit sigma-1 OS=Mus musculus GN=Ap3s1 PE=1 SV=2	NINIGDISIK-SEAGLAGAPAR	2	2	2	>sp|Q9DCR2|AP3S1_MOUSE AP-3 complex subunit sigma-1 OS=Mus musculus GN=Ap3s1 PE=1 SV=2	1	2	2	2	10.9	10.9	10.9	21.732	193	5.886	10.9	5.7	0	5.2	0	10.9	10.9	10.9	5.2	10.9	5.7	5.7	10.9	0	10.9	10.9	10.9	5.2	10.9	10.9	10.9	10.9	0	10.9				Q9DCR2	33112223	11777	Ap3s1	Q9DCR2
302	Apolipoprotein A-I OS=Mus musculus GN=Apoa1 PE=1 SV=2;CON__P15497	Apolipoprotein A-I OS=Mus musculus GN=Apoa1 PE=1 SV=2	ARPALEDLR-ASETLTAQ-DFANVYVDAVK-DFANVYVDAVKDSGR-DFWDNLEK-DFWDNLEKETDWVR-EDVELYR-HSLMPMLETLK-LQELQGR-LSPVAEEFR-LSPVAEEFRDR-QEMNKDLEEVK-QKLQELQGR-QKVAPLGAELQESAR-SNPTLNEYHTR-TQLAPHSEQMR-TQVQSVIDK-TQVQSVIDKASETLTAQ-VAPLGAELQESAR-VKDFANVYVDAVK-WKEDVELYR-VQPYLDEFQK-VQPYLDEFQKK	23;2	23;2	23;2	>sp|Q00623|APOA1_MOUSE Apolipoprotein A-I OS=Mus musculus GN=Apoa1 PE=1 SV=2	2	23	23	23	59.1	59.1	59.1	30.615	264	323.31	52.7	33.7	44.3	45.1	48.9	48.5	11.4	44.3	45.8	45.5	40.2	40.9	48.9	39	40.5	45.1	50.4	49.2	50.4	53.4	45.1	49.2	45.8	50			193;240;242	Q00623	408359966	11806	Apoa1	Q00623
303	Apolipoprotein A-IV OS=Mus musculus GN=Apoa4 PE=1 SV=3	Apolipoprotein A-IV OS=Mus musculus GN=Apoa4 PE=1 SV=3	ALVQQLEQFR-ATIDQNLEDLRR-GNTEGLQKSLEDLNR-GSPDQPQALPLPEQAQEQAQEQAQEQVQPKPLES-KGSPDQPQALPLPEQAQEQAQEQAQEQVQPKPLES-LGDASTYADGVHNK-LQLTPYIQR-LVPFVVQLSGHLAQETER-NLAPLVEDVQSK-QLEQQVEEFRR-QQLGPNSGEVESHLSFLEK-SLAPLTVGVQEK-SLEDLNR-TDVTQQLSTLFQDK	14	14	14	>sp|P06728|APOA4_MOUSE Apolipoprotein A-IV OS=Mus musculus GN=Apoa4 PE=1 SV=3	1	14	14	14	45.8	45.8	45.8	45.029	395	60.47	37	26.6	26.8	36.5	22.5	30.1	26.1	37	33.2	25.3	23.8	37.2	26.8	12.7	7.6	33.7	0	31.1	37	34.4	12.7	41	37.2	16.2				P06728	341940597	11808	Apoa4	P06728
304	Apolipoprotein B-100 OS=Mus musculus GN=Apob PE=1 SV=1;CON__ENSEMBL:ENSBTAP00000032840	Apolipoprotein B-100 OS=Mus musculus GN=Apob PE=1 SV=1	ADLSGLYSPIK-EVQVPTFTIPK-GLPYPQTLQDHLNSLSELNLLK-IEGNLIFDPSSYLPR-INIDIPLPLGGK-IYQMDIQR-LSVDQFVR-QNFNLQLQPYSFITTLSNDLR-TLSSEVLIPGFDVNFGTILR-GFEPTLEALFGK	10;1	10;1	10;1	>sp|E9Q414|APOB_MOUSE Apolipoprotein B-100 OS=Mus musculus GN=Apob PE=1 SV=1	2	10	10	10	3.1	3.1	3.1	509.43	4505	11.035	0	0.4	1	0.7	0	0.4	0.3	0.8	0.2	0.8	0.8	0.3	0.5	0	0.4	2.9	0	0.7	0.4	0.4	0	1.2	1.5	1.3				E9Q414	449061789	238055	Apob	E9Q414
305	Apolipoprotein E OS=Mus musculus GN=Apoe PE=1 SV=2	Apolipoprotein E OS=Mus musculus GN=Apoe PE=1 SV=2	ELEEQLGPVAEETR-GRLEEVGNQAR-IQASVATNPIITPVAQENQ-LGPLVEQGR-LQAEIFQAR-MEEQTQQIR-TANLGAGAAQPLR-TANLGAGAAQPLRDR	8	8	8	>sp|P08226|APOE_MOUSE Apolipoprotein E OS=Mus musculus GN=Apoe PE=1 SV=2	1	8	8	8	27.7	27.7	27.7	35.866	311	46.404	27.7	22.8	24.1	10.3	22.8	19.9	10.9	24.1	10.3	19.9	24.1	16.4	24.1	20.6	19.9	24.1	17.7	19.9	24.1	24.8	20.6	27	24.1	20.6				P08226	114041	11816	Apoe	P08226
306	Apolipoprotein O OS=Mus musculus GN=Apoo PE=2 SV=1	Apolipoprotein O OS=Mus musculus GN=Apoo PE=2 SV=1	GYIVIEDLWK-IDELSLYSVPEGQSK-TQLEENISQLR	3	3	3	>sp|Q9DCZ4|APOO_MOUSE Apolipoprotein O OS=Mus musculus GN=Apoo PE=2 SV=1	1	3	3	3	17	17	17	24.136	212	6.3501	12.3	12.3	12.3	12.3	7.1	12.3	12.3	12.3	12.3	4.7	0	12.3	0	7.1	12.3	9.9	12.3	0	11.8	17	12.3	0	12.3	12.3				Q9DCZ4	81906185	68316	Apoo	Q9DCZ4
307	Apoptosis inhibitor 5 OS=Mus musculus GN=Api5 PE=1 SV=2	Apoptosis inhibitor 5 OS=Mus musculus GN=Api5 PE=1 SV=2	DAYQVILDGVK-ELPQFATGENLPR-EVEELILTESK-GTLGGLFSQILQGEDIVR-LAAQFIPK-NYGILADATEQVGQHK-NYGILADATEQVGQHKDAYQVILDGVK-PTVEELYR-QAVPLFSK-QQLVELVAEQADLEQAFSPSDPDCVDR-STVTLSWKPVQK-TLPDEVLTK-TLPDEVLTKEVEELILTESK-YSSNLSNFNYER	14	14	14	>sp|O35841|API5_MOUSE Apoptosis inhibitor 5 OS=Mus musculus GN=Api5 PE=1 SV=2	1	14	14	14	30.4	30.4	30.4	56.784	504	158.72	24	6.3	18.5	13.1	24	13.3	22.4	17.1	17.7	14.9	21.2	12.5	13.5	0	10.9	11.7	17.1	1.6	13.1	28.8	13.1	13.3	9.3	9.3		234		O35841	341940239	11800	Api5	O35841
308	Apoptosis regulator BAX OS=Mus musculus GN=Bax PE=1 SV=1	Apoptosis regulator BAX OS=Mus musculus GN=Bax PE=1 SV=1	MIADVDTDSPR-TGAFLLQGFIQDR-VVALFYFASK	3	3	3	>sp|Q07813|BAX_MOUSE Apoptosis regulator BAX OS=Mus musculus GN=Bax PE=1 SV=1	1	3	3	3	17.7	17.7	17.7	21.394	192	17.227	6.8	6.8	6.8	12	6.8	6.8	6.8	12	12	6.8	12	17.7	12	12	0	12	17.7	12	12	12	6.8	6.8	12.5	6.8			79	Q07813	728946	12028	Bax	Q07813
309	Apoptosis-associated speck-like protein containing a CARD OS=Mus musculus GN=Pycard PE=1 SV=1	Apoptosis-associated speck-like protein containing a CARD OS=Mus musculus GN=Pycard PE=1 SV=1	DAILDALENLSGDELK-DAILDALENLSGDELKK-DMGLQELAEQLQTTK-DSLLQALK-EESGAVAAAASVPAQSTAR-GALLQMDAIDLTDK-LFSFVPSWNLTCK-LLTVQLR-VTEVDGVLDALHGSVLTEGQYQAVR	9	9	9	>sp|Q9EPB4|ASC_MOUSE Apoptosis-associated speck-like protein containing a CARD OS=Mus musculus GN=Pycard PE=1 SV=1	1	9	9	9	61.1	61.1	61.1	21.458	193	119.6	47.2	30.6	38.9	53.9	17.6	46.1	18.7	33.7	60.6	39.4	25.9	46.6	17.6	39.4	33.7	46.1	25.4	39.4	26.4	46.1	46.6	46.1	46.6	47.2		171	47;76	Q9EPB4	17370769	66824	Pycard	Q9EPB4
310	Apoptosis-inducing factor 1, mitochondrial OS=Mus musculus GN=Aifm1 PE=1 SV=1	Apoptosis-inducing factor 1, mitochondrial OS=Mus musculus GN=Aifm1 PE=1 SV=1	AIASATEGGSVPQIR-APSHVPFLLIGGGTAAFAAAR-ELWFSDDPNVTK-GVIFYLR-KSQASGIEVIQLFPEK-KVETDHIVTAVGLEPNVELAK-LNDGSQITFEK-SIYFQPPSFYVSAQDLPNIENGGVAVLTGK-TGGLEIDSDFGGFR-VETDHIVTAVGLEPNVELAK	10	10	10	>sp|Q9Z0X1|AIFM1_MOUSE Apoptosis-inducing factor 1, mitochondrial OS=Mus musculus GN=Aifm1 PE=1 SV=1	1	10	10	10	24	24	24	66.765	612	29.05	18.5	5.1	7.7	12.7	9.3	17.6	11.6	14.2	5.9	7.7	8.8	16.2	5.7	0	1.8	20.9	12.7	4.7	11.9	10.5	10.3	13.6	18.5	11.1				Q9Z0X1	13431781	26926	Aifm1	Q9Z0X1
311	Apoptotic chromatin condensation inducer in the nucleus OS=Mus musculus GN=Acin1 PE=1 SV=3	Apoptotic chromatin condensation inducer in the nucleus OS=Mus musculus GN=Acin1 PE=1 SV=3	AAPCIYWLPLTESQIVQK-ETQIVSLPQEENEVK-GVQAGNSDTEGGQPGR-ISNIVHISNLVRPFTLGQLK-LLDDLFR-SAPLPLTVEEFAPAK-SGVSITIDDPVR-TGTLVEEAFWIDK-WGASTAATQK	9	9	9	>sp|Q9JIX8|ACINU_MOUSE Apoptotic chromatin condensation inducer in the nucleus OS=Mus musculus GN=Acin1 PE=1 SV=3	1	9	9	9	9.4	9.4	9.4	150.72	1338	21.855	5.2	2.3	5.9	2.6	4.7	4.4	5.5	4.7	1.6	1.9	4.9	4.2	3	0	1.5	5.2	3.7	0	2.3	5.2	1.1	4.1	4.5	3.3		1222		Q9JIX8	341940614	56215	Acin1	Q9JIX8
312	Apoptotic protease-activating factor 1 OS=Mus musculus GN=Apaf1 PE=1 SV=3	Apoptotic protease-activating factor 1 OS=Mus musculus GN=Apaf1 PE=1 SV=3	GSPLVVSLIGALLR-IIELPNNR-SLLILDDVWDPWVLK	3	3	3	>sp|O88879|APAF_MOUSE Apoptotic protease-activating factor 1 OS=Mus musculus GN=Apaf1 PE=1 SV=3	1	3	3	3	3	3	3	141	1249	2.6807	0	0.6	1.1	0.6	0	0.6	2.3	1.2	0	0	0.6	0	0.6	0	0.6	1.8	0	0.6	0	2.3	0	0.6	2.3	0				O88879	341940601	11783	Apaf1	O88879
313	Aquaporin-1 OS=Mus musculus GN=Aqp1 PE=1 SV=3	Aquaporin-1 OS=Mus musculus GN=Aqp1 PE=1 SV=3	NQTLVQDNVK-SFGSAVLTR-VWTSGQVEEYDLDADDINSR	3	3	3	>sp|Q02013|AQP1_MOUSE Aquaporin-1 OS=Mus musculus GN=Aqp1 PE=1 SV=3	1	3	3	3	14.5	14.5	14.5	28.793	269	74.484	14.5	3.3	7.1	14.5	14.5	14.5	3.3	10.8	10.8	14.5	14.5	14.5	14.5	14.5	14.5	14.5	14.5	10.8	10.8	14.5	14.5	14.5	14.5	14.5				Q02013	543832	11826	Aqp1	Q02013
314	Arachidonate 12-lipoxygenase, 12S-type OS=Mus musculus GN=Alox12 PE=1 SV=4	Arachidonate 12-lipoxygenase, 12S-type OS=Mus musculus GN=Alox12 PE=1 SV=4	AVLSQFQADLDNLEK-AVLSQFQADLDNLEKEITAR-DALQLWEVTAR-GFPVSFQSR-GKEEEFDFDVPEDLGPLQFVK-LAGDNALDVFQK-LELQLRPAR-NEQLDLPYEYLKPSR-NGSLFEADFILLDGIPANVIR-RLDFEWTLK-SWNHLEDFDQIFWGQK-TQLISDGGIFDQVVSTGGGGHVQLLTR-WVQGEGILSLPEGTAR	13	13	13	>sp|P39655|LOX12_MOUSE Arachidonate 12-lipoxygenase, 12S-type OS=Mus musculus GN=Alox12 PE=1 SV=4	1	13	13	13	28.1	28.1	28.1	75.389	663	113.09	20.8	5.3	12.2	20.8	16.3	18.9	16	17.8	17.5	10.4	11.8	18.7	14.9	17.6	21.3	21.3	22.8	16.3	16.3	25.3	18.1	18.1	28.1	24.6				P39655	158518404	11684	Alox12	P39655
315	Arachidonate 15-lipoxygenase OS=Mus musculus GN=Alox15 PE=1 SV=4	Arachidonate 15-lipoxygenase OS=Mus musculus GN=Alox15 PE=1 SV=4	DGTILNVAATSISDLPVDQR-LQPDGQLLPIAIQLELPK-SLDDFNYVFK-SLDIPYEYLRPSLVENSVAI-VDVSEYLGPLLFVR-YVVGMFDLYYK	6	6	6	>sp|P39654|LOX15_MOUSE Arachidonate 15-lipoxygenase OS=Mus musculus GN=Alox15 PE=1 SV=4	1	6	6	6	14	14	14	75.444	663	9.7327	4.8	1.5	1.5	0	4.8	6.3	9.4	9.4	4.4	4.8	0	6.3	7.8	1.5	7.8	3.6	6.3	1.5	9.4	9.4	7.2	7.8	1.5	1.5				P39654	158518403	11687	Alox15	P39654
316	Arachidonate 5-lipoxygenase OS=Mus musculus GN=Alox5 PE=1 SV=3	Arachidonate 5-lipoxygenase OS=Mus musculus GN=Alox5 PE=1 SV=3	GVVTIEQIVDTLPDR-IVPIAIQLNQTPGESNPIFLPTDSK-LPYYYLSPDR	3	3	3	>sp|P48999|LOX5_MOUSE Arachidonate 5-lipoxygenase OS=Mus musculus GN=Alox5 PE=1 SV=3	1	3	3	3	7.4	7.4	7.4	77.966	674	3.5922	1.5	0	1.5	0	0	5.9	0	0	0	3.7	0	0	0	0	0	0	1.5	5.9	3.7	0	0	1.5	1.5	0				P48999	341941017	11689	Alox5	P48999
317	Arachidonate 5-lipoxygenase-activating protein OS=Mus musculus GN=Alox5ap PE=1 SV=2	Arachidonate 5-lipoxygenase-activating protein OS=Mus musculus GN=Alox5ap PE=1 SV=2	TGTLAFER-TVSTTISPLLLIP-YFVGYLGER	3	3	3	>sp|P30355|AL5AP_MOUSE Arachidonate 5-lipoxygenase-activating protein OS=Mus musculus GN=Alox5ap PE=1 SV=2	1	3	3	3	18.6	18.6	18.6	18.136	161	6.4456	8.1	8.1	13	13.7	5	18.6	13.7	13	13.7	18.6	10.6	18.6	10.6	8.1	8.1	13.7	10.6	18.6	8.1	13	8.1	13	13.7	18.6				P30355	77416859	11690	Alox5ap	P30355
318	ARF GTPase-activating protein GIT1 OS=Mus musculus GN=Git1 PE=1 SV=1	ARF GTPase-activating protein GIT1 OS=Mus musculus GN=Git1 PE=1 SV=1	EFATLIIDILSEAK-SAVPFLPVNPEYSATR-LLSLGAQANFFHPEK-NIQELLR	4	4	2	>sp|Q68FF6|GIT1_MOUSE ARF GTPase-activating protein GIT1 OS=Mus musculus GN=Git1 PE=1 SV=1	1	4	4	2	6.8	6.8	3.9	85.299	770	10.063	2.9	0.9	2.9	2.9	0.9	2.9	2.9	2.9	5.8	0	0	0.9	0	0	0	0.9	0.9	0	0.9	2.7	2.9	1.9	2.9	0.9				Q68FF6	81910752	216963	Git1	Q68FF6
319	ARF GTPase-activating protein GIT2 OS=Mus musculus GN=Git2 PE=1 SV=2	ARF GTPase-activating protein GIT2 OS=Mus musculus GN=Git2 PE=1 SV=2	LLTSSAYR-TPVDYARQGGHHELAER	4	2	2	>sp|Q9JLQ2|GIT2_MOUSE ARF GTPase-activating protein GIT2 OS=Mus musculus GN=Git2 PE=1 SV=2	1	4	2	2	6.6	3.5	3.5	78.765	708	4.699	3.1	1	3.1	3.1	1	3.1	4.2	4.2	2.1	0	0	1	0	0	0	1	1	0	3.4	1	4.2	2.1	3.1	1				Q9JLQ2	341940748	26431	Git2	Q9JLQ2
320	Arf-GAP domain and FG repeat-containing protein 1 OS=Mus musculus GN=Agfg1 PE=1 SV=2	Arf-GAP domain and FG repeat-containing protein 1 OS=Mus musculus GN=Agfg1 PE=1 SV=2	AGLQTADKYAALANLDNIFSAGQGGDQGSGFGTTGK-SSSADFGTFSTSQSHQTASTVSK-YAALANLDNIFSAGQGGDQGSGFGTTGK	3	3	3	>sp|Q8K2K6|AGFG1_MOUSE Arf-GAP domain and FG repeat-containing protein 1 OS=Mus musculus GN=Agfg1 PE=1 SV=2	1	3	3	3	10.5	10.5	10.5	58.042	561	14.924	10.5	4.1	5	4.1	10.5	10.5	6.4	4.1	6.4	4.1	0	4.1	4.1	0	0	10.5	4.1	4.1	10.5	10.5	0	10.5	10.5	10.5				Q8K2K6	90110041	15463	Agfg1	Q8K2K6
321	Arf-GAP domain and FG repeat-containing protein 2 OS=Mus musculus GN=Agfg2 PE=1 SV=1	Arf-GAP domain and FG repeat-containing protein 2 OS=Mus musculus GN=Agfg2 PE=1 SV=1	IWLGLFDAR-TLLGDPVPSLSDPASTSSQPGSQSQAR	2	2	2	>sp|Q80WC7|AGFG2_MOUSE Arf-GAP domain and FG repeat-containing protein 2 OS=Mus musculus GN=Agfg2 PE=1 SV=1	1	2	2	2	7.5	7.5	7.5	48.967	479	4.5305	0	0	0	0	0	0	0	0	0	0	0	0	0	0	0	0	0	0	0	7.5	0	0	0	0				Q80WC7	49035963	231801	Agfg2	Q80WC7
322	Arf-GAP with coiled-coil, ANK repeat and PH domain-containing protein 2 OS=Mus musculus GN=Acap2 PE=1 SV=2	Arf-GAP with coiled-coil, ANK repeat and PH domain-containing protein 2 OS=Mus musculus GN=Acap2 PE=1 SV=2	HLNPGLQLYR-SLTLDTWEPELLK-WFSIQNNQLVYQK	3	3	3	>sp|Q6ZQK5|ACAP2_MOUSE Arf-GAP with coiled-coil, ANK repeat and PH domain-containing protein 2 OS=Mus musculus GN=Acap2 PE=1 SV=2	1	3	3	3	4.7	4.7	4.7	87.21	770	4.2062	4.7	1.7	1.7	0	1.7	3	1.7	1.7	3	1.7	0	3	0	0	0	0	1.7	1.7	1.7	3.4	1.7	1.7	3.4	3.4				Q6ZQK5	158706468	78618	Acap2	Q6ZQK5
323	Arf-GAP with Rho-GAP domain, ANK repeat and PH domain-containing protein 1 OS=Mus musculus GN=Arap1 PE=2 SV=2	Arf-GAP with Rho-GAP domain, ANK repeat and PH domain-containing protein 1 OS=Mus musculus GN=Arap1 PE=2 SV=2	AAASLGDTLSEQQLGDSDIPVIVYR-AFVPPLAEDLLAR-AVFPEGPWEEPLQLR-EELLLPSVSPR-SFDLTTPYR-SVAAFTADPLSLLR	6	6	6	>sp|Q4LDD4|ARAP1_MOUSE Arf-GAP with Rho-GAP domain, ANK repeat and PH domain-containing protein 1 OS=Mus musculus GN=Arap1 PE=2 SV=2	1	6	6	6	6	6	6	162.27	1452	14.63	5	2.6	2.6	2.6	3.2	1.7	3.7	2.6	1.7	1.4	3.2	1.7	3.2	0.6	1.7	1.7	0.8	1.5	2.6	1.9	1.7	3.2	2.6	2.3				Q4LDD4	226694317	69710	Arap1	Q4LDD4
324	Arginine--tRNA ligase, cytoplasmic OS=Mus musculus GN=Rars PE=2 SV=2	Arginine--tRNA ligase, cytoplasmic OS=Mus musculus GN=Rars PE=2 SV=2	AAYPDLENPPLIVTPSQQPK-ALTAEIDR-AWNLICDVSR-AYQCVVLLQSK-DFVSEQLTSLLVNGVQLPVLGDK-DFVSEQLTSLLVNGVQLPVLGDKEK-FPDYLTVSPPIGDLQAFYK-GESFYQDR-GFDILGIKPVQR-GNTAAYLLYAFTR-IYDALDITLIER-LFEFAGYDVLR-LNDYIFSFDK-LQEVFGCAIR-VIVDFSSPNIAK-YIDKVEIAGPGFINVHLR	16	16	16	>sp|Q9D0I9|SYRC_MOUSE Arginine--tRNA ligase, cytoplasmic OS=Mus musculus GN=Rars PE=2 SV=2	1	16	16	16	30.2	30.2	30.2	75.673	660	56.116	19.8	13.3	11.5	13.2	19.1	20	21.4	19.1	14.1	16.4	11.2	15.8	12	10.2	18	15.2	22.9	13	15.3	24.1	13.6	18	22.7	24.5		86;293;312		Q9D0I9	20178137	104458	Rars	Q9D0I9
325	Argininosuccinate lyase OS=Mus musculus GN=Asl PE=1 SV=1	Argininosuccinate lyase OS=Mus musculus GN=Asl PE=1 SV=1	AEAERDVLFPGYTHLQR-ELIGEAAGK-FNSSISYDR-FVGAVDPIMEK-HLWNVDVQGSK-INVLPLGSGAIAGNPLGVDR-INVLPLGSGAIAGNPLGVDRELLR-NDQVVTDLR-NPDSLELIR-QALSPDMLATDLAYYLVR-VAEEWAQGTFK	11	11	11	>sp|Q91YI0|ARLY_MOUSE Argininosuccinate lyase OS=Mus musculus GN=Asl PE=1 SV=1	1	11	11	11	27.6	27.6	27.6	51.739	464	30.053	10.6	4.3	9.9	8	14.7	8.8	12.7	10.8	17	11	15.1	10.8	8.6	0	12.7	5.6	0	6.2	10.8	17	8.8	11.4	14.7	14.7			21	Q91YI0	21263402	109900	Asl	Q91YI0
326	Argininosuccinate synthase OS=Mus musculus GN=Ass1 PE=1 SV=1	Argininosuccinate synthase OS=Mus musculus GN=Ass1 PE=1 SV=1	APNSPDVLEIEFKK-EDFEEAR-EQGYDVIAYLANIGQK-EQGYDVIAYLANIGQKEDFEEAR-FELTCYSLAPQIK-GQVYILGR-IDIVENR-NDLMEYAK-NQAPPGLYTK-QHGIPIPVTPK-TQDPAKAPNSPDVLEIEFK-TTSLELFMYLNEVAGK-VQVSVFK	13	13	13	>sp|P16460|ASSY_MOUSE Argininosuccinate synthase OS=Mus musculus GN=Ass1 PE=1 SV=1	1	13	13	13	29.9	29.9	29.9	46.584	412	27.452	14.8	7.8	6.1	6.1	15.5	11.4	10.4	13.3	20.4	7.3	14.3	7.8	4.1	4.1	22.6	14.6	0	16	7.3	11.2	10.9	10.4	12.9	6.1		132		P16460	114290	11898	Ass1	P16460
327	Armadillo repeat-containing protein 10 OS=Mus musculus GN=Armc10 PE=1 SV=1	Armadillo repeat-containing protein 10 OS=Mus musculus GN=Armc10 PE=1 SV=1	ALNALNNLSVNVENQTK-ALTLFQNINNCLK-ALVTLGNNAAFSTNQAIIR-ELGGIPIVGNK-INSLNQSIKEK-LANQIPFAK-LLYLLESTDDPVITEK	7	7	7	>sp|Q9D0L7|ARM10_MOUSE Armadillo repeat-containing protein 10 OS=Mus musculus GN=Armc10 PE=1 SV=1	1	7	7	7	31.4	31.4	31.4	33.31	306	23.77	19.6	7.2	24.2	24.8	31.4	27.8	3.6	19.6	18.3	22.5	27.1	23.5	23.5	18.6	3.6	20.6	14.4	18	13.4	27.1	28.4	15.7	18.3	27.1		253		Q9D0L7	81904651	67211	Armc10	Q9D0L7
329	Arsenite methyltransferase OS=Mus musculus GN=As3mt PE=2 SV=2	Arsenite methyltransferase OS=Mus musculus GN=As3mt PE=2 SV=2	DLAIIAQK-FAPDFLFTPVDASLPAPQGR-FGFQAPNVTFLHGR-HGGELYFSDVYASLEVPEDIK-ILDLGSGSGR-QQVLQEVYR	6	6	6	>sp|Q91WU5|AS3MT_MOUSE Arsenite methyltransferase OS=Mus musculus GN=As3mt PE=2 SV=2	1	6	6	6	21.8	21.8	21.8	41.793	376	20.522	19.7	15.7	9	9	19.1	9	9.8	16.2	21.8	13.8	21.8	11.2	14.1	7.4	5.3	13	0	17	3.7	13	13.8	19.7	19.7	5.9				Q91WU5	341940245	57344	As3mt	Q91WU5
330	Arylamine N-acetyltransferase 2 OS=Mus musculus GN=Nat2 PE=1 SV=1	Arylamine N-acetyltransferase 2 OS=Mus musculus GN=Nat2 PE=1 SV=1	EQYVPNQEFINSDLLEK-FSYKDNVDLVEFK-SLTEEEIEDVLR-TIFGVSLER	4	4	4	>sp|P50295|ARY2_MOUSE Arylamine N-acetyltransferase 2 OS=Mus musculus GN=Nat2 PE=1 SV=1	1	4	4	4	17.6	17.6	17.6	33.701	290	6.5257	10	4.1	5.9	14.5	10	13.4	0	13.1	17.6	4.1	10	13.1	10	14.5	10	14.5	5.9	10	10	17.6	14.5	10	10	10				P50295	1703436	17961	Nat2	P50295
331	Arylsulfatase B OS=Mus musculus GN=Arsb PE=2 SV=3	Arylsulfatase B OS=Mus musculus GN=Arsb PE=2 SV=3	DGEEPAKEYNNIYSTNIFTK-GTGFVASPLLK-SGGNNWPLR	3	3	3	>sp|P50429|ARSB_MOUSE Arylsulfatase B OS=Mus musculus GN=Arsb PE=2 SV=3	1	3	3	3	7.5	7.5	7.5	59.646	534	5.2794	3.7	3.7	3.7	0	2.1	2.1	2.1	0	7.5	3.7	7.5	3.7	2.1	0	7.5	0	0	2.1	3.7	5.8	3.7	2.1	3.7	3.7				P50429	122065132	11881	Arsb	P50429
332	Asparagine synthetase [glutamine-hydrolyzing] OS=Mus musculus GN=Asns PE=2 SV=3	Asparagine synthetase [glutamine-hydrolyzing] OS=Mus musculus GN=Asns PE=2 SV=3	APSPEKAEEESER-EAFSDGITSVK-ELYLFDVLR-FPFNTPK-IGCLLSGGLDSSLVAASLLK-ILFDNAIK-LFPGFDLETVK	7	7	7	>sp|Q61024|ASNS_MOUSE Asparagine synthetase [glutamine-hydrolyzing] OS=Mus musculus GN=Asns PE=2 SV=3	1	7	7	7	14.1	14.1	14.1	64.282	561	11.207	1.6	0	0	0	1.6	5.5	3	3.6	0	5.5	1.6	1.6	1.6	1.6	5.5	7	9.1	3.4	5	10.5	5	3	7	6.8		255		Q61024	6707669	27053	Asns	Q61024
333	Asparagine--tRNA ligase, cytoplasmic OS=Mus musculus GN=Nars PE=1 SV=2	Asparagine--tRNA ligase, cytoplasmic OS=Mus musculus GN=Nars PE=1 SV=2	EDGTFYEFGDDIPEAPER-EGIDPAPYYWYTDQR-EGIDPAPYYWYTDQRK-EPFPTIYVDSQKENER-FLSWILNR-GYCEVTTPTLVQTQVEGGATLFK-ISALEGYR-KEDGTFYEFGDDIPEAPER-LMTDTINEPILLCR-MNYSDAIEWLK-NDPSLPEPACVK-NLMFLVLR-SPVASIVYELNPNFKPPK-SWDSEEILEGYKR	14	14	14	>sp|Q8BP47|SYNC_MOUSE Asparagine--tRNA ligase, cytoplasmic OS=Mus musculus GN=Nars PE=1 SV=2	1	14	14	14	29.7	29.7	29.7	64.279	559	92.152	14.8	10.9	13.6	7	15.9	22.9	16.8	16.6	12.2	7.5	11.6	21.5	12.5	8.9	14.7	17.9	14.7	16.6	15.7	22.5	11.6	11.4	19.1	25.6		125;277;449	156;438	Q8BP47	193806326	70223	Nars	Q8BP47
334	Aspartate aminotransferase, cytoplasmic OS=Mus musculus GN=Got1 PE=1 SV=3	Aspartate aminotransferase, cytoplasmic OS=Mus musculus GN=Got1 PE=1 SV=3	APPSVFAQVPQAPPVLVFK-FLFPFFDSAYQGFASGDLEK-HIYLLPSGR-IANDNSLNHEYLPILGLAEFR-IGADFLGR-ITWSNPPAQGAR-IVAATLSDPELFK-IVAATLSDPELFKEWK-LVLGDNSLAIR-NFGLYNER-NLDYVATSIHEAVTK-NTPIYVSSPTWENHNAVFSAAGFK-QVEYLVNEK-TDESQPWVLPVVR-VGGVQSLGGTGALR-VGNLTVVGK	16	16	16	>sp|P05201|AATC_MOUSE Aspartate aminotransferase, cytoplasmic OS=Mus musculus GN=Got1 PE=1 SV=3	1	16	16	16	50.4	50.4	50.4	46.247	413	221.9	39.7	41.4	42.9	40.2	35.6	38.7	40.7	45.5	41.6	33.4	40.7	43.6	39.2	16	36.6	43.1	4.6	36.6	39.5	46.5	23.5	35.8	48.4	26.4				P05201	338817898	14718	Got1	P05201
335	Aspartate aminotransferase, mitochondrial OS=Mus musculus GN=Got2 PE=1 SV=1	Aspartate aminotransferase, mitochondrial OS=Mus musculus GN=Got2 PE=1 SV=1	ASAELALGENNEVLK-DAGMQLQGYR-DDNGKPYVLPSVR-EFSVYMTK-EIASVVK-EYLPIGGLAEFCK-FVTVQTISGTGALR-HFIEQGINVCLCQSYAK-IAATILTSPDLR-IAATILTSPDLRK-ILIRPLYSNPPLNGAR-ISVAGVTSGNVGYLAHAIHQVTK-NLDKEYLPIGGLAEFCK-NMGLYGER-QWLQEVK-TCGFDFSGALEDISK-TQLVSNLK-VGASFLQR	18	18	18	>sp|P05202|AATM_MOUSE Aspartate aminotransferase, mitochondrial OS=Mus musculus GN=Got2 PE=1 SV=1	1	18	18	18	46.3	46.3	46.3	47.411	430	311.29	32.6	35.1	33.3	30.9	33.5	38.8	29.8	37.4	42.6	36.7	42.6	29.3	33.5	20.7	38.8	35.3	8.1	33.5	30	42.8	25.3	37.4	36.7	33.5		106;187;272;274	174;281;402	P05202	112984	14719	Got2	P05202
336	Aspartate--tRNA ligase, cytoplasmic OS=Mus musculus GN=Dars PE=2 SV=2	Aspartate--tRNA ligase, cytoplasmic OS=Mus musculus GN=Dars PE=2 SV=2	ADDVVWVR-AYIDSFR-EIVDAAEDYAK-EIVDAAEDYAKER-ESIIDVEGVVR-FAANINKESIIDVEGVVR-FGAPPHAGGGIGLER-FLEPTLR-FQTEIQTVSK-GEEILSGAQR-GFVEIQTPK-IGSCTQQDVELHVQK-IHDPQLLTER-IISAASEGGANVFTVSYFK-IYVISLAEPR-LEYCEALAMLR-LPLQLDDAIRPEVEGEEDGR-LQSGICHLFR-NNAYLAQSPQLYK-QCFLVLR-QQQFNVQALVAVGDHASK-TSTSQAIFR-VFCIGPVFR	23	23	23	>sp|Q922B2|SYDC_MOUSE Aspartate--tRNA ligase, cytoplasmic OS=Mus musculus GN=Dars PE=2 SV=2	1	23	23	23	49.5	49.5	49.5	57.147	501	170.05	39.7	23.6	32.9	27.9	29.5	31.3	37.3	37.5	34.7	33.1	42.7	28.9	32.9	24.6	37.1	32.5	23	22.2	37.5	33.9	25.5	26.3	33.3	31.5		76;130;203;267;349		Q922B2	341942096	226414	Dars	Q922B2
337	Aspartyl aminopeptidase OS=Mus musculus GN=Dnpep PE=2 SV=2	Aspartyl aminopeptidase OS=Mus musculus GN=Dnpep PE=2 SV=2	ELKETEGWDIVPENK-ETACTTGVLQTLTLFK-GFFELFPSVSR-GTPEPGPLGATDER-LDNLHSCFCALQALIDSCASPASLAR-LLQAGFR-LTAFEEAIPK-NDSPCGTTIGPILASR-NINENFGPNTEIHLVPILATAVQEELEK	9	9	9	>sp|Q9Z2W0|DNPEP_MOUSE Aspartyl aminopeptidase OS=Mus musculus GN=Dnpep PE=2 SV=2	1	9	9	9	30.2	30.2	30.2	52.206	473	38.6	3.4	4.4	3.8	19.5	21.6	15.9	19.2	12.3	20.3	2.1	18.2	15.6	9.3	4.4	20.7	8.9	0	8.9	5.3	18.2	3.8	9.3	15.9	15.9		267;269;278;411;445		Q9Z2W0	341940452	13437	Dnpep	Q9Z2W0
338	Astrocytic phosphoprotein PEA-15 OS=Mus musculus GN=Pea15 PE=1 SV=1	Astrocytic phosphoprotein PEA-15 OS=Mus musculus GN=Pea15 PE=1 SV=1	ISEEEELDTK-RPDLLTMVVDYR-SEEITTGSAWFSFLESHNK	3	3	3	>sp|Q62048|PEA15_MOUSE Astrocytic phosphoprotein PEA-15 OS=Mus musculus GN=Pea15 PE=1 SV=1	1	3	3	3	31.5	31.5	31.5	15.054	130	11.473	31.5	7.7	0	22.3	14.6	0	0	7.7	22.3	0	14.6	14.6	0	0	14.6	14.6	22.3	0	7.7	22.3	0	7.7	0	22.3			78	Q62048	2498751	18611	Pea15	Q62048
339	Ataxin-10 OS=Mus musculus GN=Atxn10 PE=1 SV=2	Ataxin-10 OS=Mus musculus GN=Atxn10 PE=1 SV=2	ALTALFK-ITLLDIVIAK	2	2	2	>sp|P28658|ATX10_MOUSE Ataxin-10 OS=Mus musculus GN=Atxn10 PE=1 SV=2	1	2	2	2	3.6	3.6	3.6	53.706	475	2.6393	0	1.5	0	3.6	2.1	2.1	3.6	3.6	3.6	2.1	2.1	2.1	0	0	3.6	2.1	0	0	0	2.1	1.5	2.1	0	0				P28658	19857896	54138	Atxn10	P28658
340	Atlastin-3 OS=Mus musculus GN=Atl3 PE=2 SV=1	Atlastin-3 OS=Mus musculus GN=Atl3 PE=2 SV=1	ALASVLLQDHIR-DIASEFKEQLQALIPYVLNPSK-EGGHSDWLGDPEEPLTGFSWR-ELGGAIDSGAAYVLEQASSHIGNSTQAAVR-GGSDPETTGIQIWSEVFTVK	5	5	5	>sp|Q91YH5|ATLA3_MOUSE Atlastin-3 OS=Mus musculus GN=Atl3 PE=2 SV=1	1	5	5	5	19.4	19.4	19.4	60.574	541	30.856	17.2	0	5.5	7.6	15.3	13.5	13.1	13.1	13.1	6.1	15.3	13.1	2.2	5.9	3.9	13.5	15.3	0	9.4	13.3	11.6	9.4	19.4	15.3				Q91YH5	81902439	109168	Atl3	Q91YH5
341	ATP synthase F(0) complex subunit B1, mitochondrial OS=Mus musculus GN=Atp5f1 PE=1 SV=1	ATP synthase F(0) complex subunit B1, mitochondrial OS=Mus musculus GN=Atp5f1 PE=1 SV=1	HYLFDVQR-IAQLEEVK-LGLIPEEFFQFLYPK-NNIALALEVTYR-QIQDAIDMEK-SISVQQEKETIAK-TGVTGPYVLGTGLSLYFLSK-YGASFGEFIDK-YGASFGEFIDKLNEEK	9	9	9	>sp|Q9CQQ7|AT5F1_MOUSE ATP synthase F(0) complex subunit B1, mitochondrial OS=Mus musculus GN=Atp5f1 PE=1 SV=1	1	9	9	9	39.8	39.8	39.8	28.948	256	87.286	28.1	17.6	26.2	36.7	9.4	31.2	0	26.2	32.8	12.1	16	21.1	8.2	14.1	12.5	35.9	8.2	31.2	17.6	39.8	34.8	14.5	12.5	24.2			152	Q9CQQ7	20454828	11950	Atp5f1	Q9CQQ7
343	ATP synthase subunit alpha, mitochondrial OS=Mus musculus GN=Atp5a1 PE=1 SV=1	ATP synthase subunit alpha, mitochondrial OS=Mus musculus GN=Atp5a1 PE=1 SV=1	APGIIPR-AVDSLVPIGR-DNGKHALIIYDDLSK-EAYPGDVFYLHSR-EIVTNFLAGFEP-ELIIGDR-EPMQTGIK-EVAAFAQFGSDLDAATQQLLSR-FENAFLSHVISQHQSLLGNIR-GIRPAINVGLSVSR-GMSLNLEPDNVGVVVFGNDK-GMSLNLEPDNVGVVVFGNDKLIK-GYLDKLEPSK-HALIIYDDLSK-ILGADTSVDLEETGR-LELAQYR-LKEIVTNFLAGFEP-LTDADAMK-LYCIYVAIGQK-LYCIYVAIGQKR-QGQYSPMAIEEQVAVIYAGVR-QMSLLLR-RTGAIVDVPVGEELLGR-STVAQLVK-TGAIVDVPVGEELLGR-TGTAEMSSILEER-TSIAIDTIINQK-TSIAIDTIINQKR-VLSI…	31	31	31	>sp|Q03265|ATPA_MOUSE ATP synthase subunit alpha, mitochondrial OS=Mus musculus GN=Atp5a1 PE=1 SV=1	1	31	31	31	56.6	56.6	56.6	59.752	553	323.31	49	38.2	43.4	50.3	51	47.2	50.6	51	53.2	49	53.9	51.5	36.7	39.4	51.4	49.9	35.6	39.6	46.3	55.2	46.5	47	50.6	52.3		244	51;105;189;269;324;479	Q03265	416677	11946	Atp5a1	Q03265
344	ATP synthase subunit beta, mitochondrial OS=Mus musculus GN=Atp5b PE=1 SV=2	ATP synthase subunit beta, mitochondrial OS=Mus musculus GN=Atp5b PE=1 SV=2	AHGGYSVFAGVGER-AIAELGIYPAVDPLDSTSR-DQEGQDVLLFIDNIFR-EGNDLYHEMIESGVINLK-FLSQPFQVAEVFTGHMGK-FTQAGSEVSALLGR-GFQQILAGEYDHLPEQAFYMVGPIEEAVAK-GSITSVQAIYVPADDLTDPAPATTFAHLDATTVLSR-IGLFGGAGVGK-IMDPNIVGNEHYDVAR-IMNVIGEPIDER-IMNVIGEPIDERGPIK-IPSAVGYQPTLATDMGTMQER-IPVGPETLGR-KGSITSVQAIYVPADDLTDPAPATTFAHLDATTVLSR-LVLEVAQHLGESTVR-QFAPIHAEAPEFIEMSVEQEILVTGIK-SLQDIIAILGMDELSEEDKLTVSR-TIAMDGTEGLVR-TREGNDLYHEMIES…	26	26	26	>sp|P56480|ATPB_MOUSE ATP synthase subunit beta, mitochondrial OS=Mus musculus GN=Atp5b PE=1 SV=2	1	26	26	26	71.8	71.8	71.8	56.3	529	323.31	71.1	39.7	52.7	53.3	58	67.9	61.1	66.5	56.5	49.9	62.6	51.8	42.7	29.9	49	68.4	37.2	48.4	54.8	71.1	48	52.4	71.1	66			113;145;176;217;250;272;339;342;408;443;478;509	P56480	20455479	11947	Atp5b	P56480
345	ATP synthase subunit d, mitochondrial OS=Mus musculus GN=Atp5h PE=1 SV=3	ATP synthase subunit d, mitochondrial OS=Mus musculus GN=Atp5h PE=1 SV=3	ANVAKPGLVDDFEK-IPVPEDK-KYPYWPHQPIENL-LASLSEKPPAIDWAYYR-NIIPFDQMTIDDLNEIFPETK-SCAEFVSGSQLR-TIDWVSFVEVMPQNQK-YPYWPHQPIENL-YTALVDQEEKEDVK	9	9	9	>sp|Q9DCX2|ATP5H_MOUSE ATP synthase subunit d, mitochondrial OS=Mus musculus GN=Atp5h PE=1 SV=3	1	9	9	9	70.8	70.8	70.8	18.749	161	111.84	70.8	28	27.3	45.3	32.3	49.1	8.7	57.8	65.8	47.8	22.4	46	39.8	19.3	45.3	28	32.3	50.3	35.4	43.5	42.9	47.2	57.8	23.6		101	20;131	Q9DCX2	25089776	71679	Atp5h	Q9DCX2
346	ATP synthase subunit delta, mitochondrial OS=Mus musculus GN=Atp5d PE=1 SV=1	ATP synthase subunit delta, mitochondrial OS=Mus musculus GN=Atp5d PE=1 SV=1	AQSELSGAADEAAR-IEANEALVK	2	2	2	>sp|Q9D3D9|ATPD_MOUSE ATP synthase subunit delta, mitochondrial OS=Mus musculus GN=Atp5d PE=1 SV=1	1	2	2	2	13.7	13.7	13.7	17.6	168	21.372	13.7	13.7	13.7	13.7	5.4	5.4	8.3	13.7	13.7	13.7	5.4	13.7	13.7	13.7	13.7	13.7	13.7	13.7	13.7	13.7	13.7	13.7	13.7	13.7				Q9D3D9	78099820	66043	Atp5d	Q9D3D9
347	ATP synthase subunit e, mitochondrial OS=Mus musculus GN=Atp5i PE=1 SV=2	ATP synthase subunit e, mitochondrial OS=Mus musculus GN=Atp5i PE=1 SV=2	ELAEAQDDSILK-IERELAEAQDDSILK-VPPVQVSPLIK-YSALIIGMAYGAK	4	4	4	>sp|Q06185|ATP5I_MOUSE ATP synthase subunit e, mitochondrial OS=Mus musculus GN=Atp5i PE=1 SV=2	1	4	4	4	54.9	54.9	54.9	8.2355	71	32.929	50.7	39.4	54.9	54.9	54.9	54.9	36.6	54.9	54.9	54.9	54.9	54.9	50.7	54.9	39.4	36.6	54.9	33.8	36.6	39.4	54.9	39.4	54.9	50.7			23	Q06185	461586	11958	Atp5i	Q06185
349	ATP synthase subunit g, mitochondrial OS=Mus musculus GN=Atp5l PE=1 SV=1	ATP synthase subunit g, mitochondrial OS=Mus musculus GN=Atp5l PE=1 SV=1	GIVGYDV-VELVPPTPAEIPTAIQSVK-VELVPPTPAEIPTAIQSVKK	3	3	3	>sp|Q9CPQ8|ATP5L_MOUSE ATP synthase subunit g, mitochondrial OS=Mus musculus GN=Atp5l PE=1 SV=1	1	3	3	3	26.2	26.2	26.2	11.424	103	7.0551	25.2	26.2	26.2	19.4	26.2	25.2	18.4	26.2	26.2	19.4	25.2	26.2	26.2	25.2	25.2	25.2	25.2	25.2	19.4	19.4	19.4	19.4	19.4	19.4				Q9CPQ8	52782750	27425	Atp5l	Q9CPQ8
350	ATP synthase subunit gamma, mitochondrial OS=Mus musculus GN=Atp5c1 PE=1 SV=1	ATP synthase subunit gamma, mitochondrial OS=Mus musculus GN=Atp5c1 PE=1 SV=1	ELIEIISGAAALD-EVMIVGVGEK-HLIIGVSSDR-LTLTFNR-NEVAALTAAGK-THSDQFLVSFK-VYGTGSLALYEK	7	7	7	>sp|Q91VR2|ATPG_MOUSE ATP synthase subunit gamma, mitochondrial OS=Mus musculus GN=Atp5c1 PE=1 SV=1	1	7	7	7	24.8	24.8	24.8	32.886	298	39.463	19.1	14.8	17.1	17.1	13.8	20.5	7.7	20.5	18.1	20.5	14.8	14.8	11.1	17.1	20.5	14.8	18.1	13.4	11.1	21.5	17.1	17.1	18.1	22.5			129	Q91VR2	21263432	11949	Atp5c1	Q91VR2
351	ATP synthase subunit O, mitochondrial OS=Mus musculus GN=Atp5o PE=1 SV=1	ATP synthase subunit O, mitochondrial OS=Mus musculus GN=Atp5o PE=1 SV=1	EKFSPLTANLMNLLAENGR-GEVPCTVTTASPLDDAVLSELK-LGNTQGIISAFSTIMSVHR-LVRPPVQVYGIEGR-SFLSPNQILK-VSLAVLNPYIK-YATALYSAASK	7	7	7	>sp|Q9DB20|ATPO_MOUSE ATP synthase subunit O, mitochondrial OS=Mus musculus GN=Atp5o PE=1 SV=1	1	7	7	7	49.8	49.8	49.8	23.363	213	69.887	21.6	21.6	30.5	21.6	21.6	40.8	21.6	30.5	49.8	25.8	21.6	21.6	21.6	21.6	30.5	21.6	30.5	21.6	16.4	30.5	21.6	21.6	30.5	21.6		141	109;132	Q9DB20	47605546	102641678	Atp5o	Q9DB20
352	ATPase Asna1 OS=Mus musculus GN=Asna1 PE=1 SV=2	ATPase Asna1 OS=Mus musculus GN=Asna1 PE=1 SV=2	ESVLIISTDPAHNISDAFDQK-GADKVNTFSALLLEPYKPPSTQ-LEETLPVIR-LIQELAK-LLNFPTIVER-VNTFSALLLEPYKPPSTQ-WIFVGGK	7	7	7	>sp|O54984|ASNA_MOUSE ATPase Asna1 OS=Mus musculus GN=Asna1 PE=1 SV=2	1	7	7	7	21.8	21.8	21.8	38.822	348	17.384	17.8	19.8	17	19.8	17	17	19.8	19.8	17.8	17.8	19.8	17	17	13.8	12.6	14.9	0	17.8	19.8	17	17.8	19.8	19.8	7.5				O54984	14916955	56495	Asna1	O54984
353	ATPase family AAA domain-containing protein 1 OS=Mus musculus GN=Atad1 PE=1 SV=1	ATPase family AAA domain-containing protein 1 OS=Mus musculus GN=Atad1 PE=1 SV=1	FINLQPSTLTDKWYGESQK-HVDLLEVAQETDGFSGSDLK-LQPSIIFIDEIDSFLR	3	3	3	>sp|Q9D5T0|ATAD1_MOUSE ATPase family AAA domain-containing protein 1 OS=Mus musculus GN=Atad1 PE=1 SV=1	1	3	3	3	15.2	15.2	15.2	40.744	361	3.9387	10	5.3	0	0	0	10.8	0	5.3	5.3	0	15.2	10.8	0	0	5.3	4.4	0	0	0	15.2	0	0	10	0				Q9D5T0	78099816	67979	Atad1	Q9D5T0
354	ATPase family AAA domain-containing protein 3 OS=Mus musculus GN=Atad3 PE=1 SV=1	ATPase family AAA domain-containing protein 3 OS=Mus musculus GN=Atad3 PE=1 SV=1	ISVLEALR-LVSRPQDALEGVILSPSLEAR-TAGTLLGEGFR	3	3	3	>sp|Q925I1|ATAD3_MOUSE ATPase family AAA domain-containing protein 3 OS=Mus musculus GN=Atad3 PE=1 SV=1	1	3	3	3	6.8	6.8	6.8	66.741	591	8.0499	4.9	3.6	4.9	3.6	4.9	4.9	4.9	4.9	3.2	6.8	6.8	1.4	6.8	1.9	0	1.9	3.2	0	0	0	5.4	6.8	4.9	4.9				Q925I1	78099818	108888	Atad3	Q925I1
356	ATP-binding cassette sub-family E member 1 OS=Mus musculus GN=Abce1 PE=2 SV=1	ATP-binding cassette sub-family E member 1 OS=Mus musculus GN=Abce1 PE=2 SV=1	CPFGALSIVNLPSNLEK-EGINIFLDGYVPTENLR-GSELQNYFTK-GTVGSILDR-LCIEVTPQSK-LKPDEGGEVPVLNVSYKPQK-LPIPRPGEVLGLVGTNGIGK-NVEDLSGGELQR-TQAIVCQQLDLTHLK-VIVFDGVPSK-YDDPPDWQEILTYFR	11	11	11	>sp|P61222|ABCE1_MOUSE ATP-binding cassette sub-family E member 1 OS=Mus musculus GN=Abce1 PE=2 SV=1	1	11	11	11	25.9	25.9	25.9	67.314	599	37.339	19.2	9	7.5	12.7	13.9	17.2	20	12	15	15.2	4.8	18	14	4.8	13.9	18.2	19.4	1.5	13.7	24.2	13	16	21.7	22.5		38;65;201		P61222	47117665	24015	Abce1	P61222
357	ATP-citrate synthase OS=Mus musculus GN=Acly PE=1 SV=1	ATP-citrate synthase OS=Mus musculus GN=Acly PE=1 SV=1	AGKDLVSSLTSGLLTIGDR-DGVYILDLAAK-DLVSSLTSGLLTIGDR-EAGVFVPR-EAYPEEAYIADLDAK-EEADEYVDIGALNGIFVLGR-EGDYVLFHHEGGVDVGDVDAK-EILIPVFK-FGGALDAAAK-LGLVGVNLSLDGVK-LLVGVDEK-LTLLNPK-LYRPGSVAYVSR-QHFPATPLLDYALEVEK-RGGPNYQEGLR-SATLFSR-SFDELGEIIQSVYEDLVAK-TIAIIAEGIPEALTR-TTDGVYEGVAIGGDR	19	19	19	>sp|Q91V92|ACLY_MOUSE ATP-citrate synthase OS=Mus musculus GN=Acly PE=1 SV=1	1	19	19	19	21.7	21.7	21.7	119.73	1091	90.928	10	10	8.4	12.1	11	12.3	11.5	12.8	10.9	11.2	11.5	9.2	11.8	4.6	11.1	17.3	9.3	5.5	7.8	13.7	9.5	11.3	13.3	9.6				Q91V92	21263374	104112	Acly	Q91V92
358	ATP-dependent (S)-NAD(P)H-hydrate dehydratase OS=Mus musculus GN=Carkd PE=1 SV=1	ATP-dependent (S)-NAD(P)H-hydrate dehydratase OS=Mus musculus GN=Carkd PE=1 SV=1	AILTPNHVEFSR-IGIVGGCQEYTGAPYFAGISALK-LHALVVGPGLGRDDLLLNNVR-SYSPELIVHPVLDSSNAVEEVEK	4	4	4	>sp|Q9CZ42|NNRD_MOUSE ATP-dependent (S)-NAD(P)H-hydrate dehydratase OS=Mus musculus GN=Carkd PE=1 SV=1	1	4	4	4	23	23	23	36.717	343	13.068	3.5	10.2	23	23	16.3	16.9	10.2	16.9	12.8	10.2	6.7	23	0	0	6.7	16.9	0	16.3	10.2	16.3	3.5	6.7	10.2	3.5		78		Q9CZ42	81904495	69225	Carkd	Q9CZ42
359	ATP-dependent 6-phosphofructokinase, liver type OS=Mus musculus GN=Pfkl PE=1 SV=4; ATP-dependent 6-phosphofructokinase, muscle type OS=Mus musculus GN=Pfkm PE=1 SV=3	ATP-dependent 6-phosphofructokinase, liver type OS=Mus musculus GN=Pfkl PE=1 SV=4	EQWWLNLR-GQVQEVGWHDVAGWLGR-NEWGSLLEELVK-TGISEGHTVYIVHDGFEGLAK-TLPKPHLEAIVENLR-TNVLGHLQQGGAPTPFDR-VFANAPDSACVIGLR-GGTPSAFDR	8;1	8;1	7;0	>sp|P12382|PFKAL_MOUSE ATP-dependent 6-phosphofructokinase, liver type OS=Mus musculus GN=Pfkl PE=1 SV=4	2	8	8	7	14.7	14.7	13.6	85.359	780	30.376	8.5	5	8.7	6.8	7.6	5.8	11.7	11.7	5.8	9.5	4.2	5	6.9	5.6	4.6	11.7	8.5	3.8	7.6	6.4	10.5	7.7	8.7	8.7		708		P12382	341941131	18641	Pfkl	P12382
360	ATP-dependent 6-phosphofructokinase, platelet type OS=Mus musculus GN=Pfkp PE=1 SV=1	ATP-dependent 6-phosphofructokinase, platelet type OS=Mus musculus GN=Pfkp PE=1 SV=1	DLLFQPVAELK-EIGWADVGGWTGQGGSILGTK-EWSGLLEELAR-KEWSGLLEELAR-LGITNLCVIGGDGSLTGANLFR-VYFIYEGYQGLVDGGSNIVEAK	7	6	6	>sp|Q9WUA3|PFKAP_MOUSE ATP-dependent 6-phosphofructokinase, platelet type OS=Mus musculus GN=Pfkp PE=1 SV=1	1	7	6	6	12.4	11.2	11.2	85.454	784	18.363	7	6.8	6.9	6.6	4.3	4.3	5.6	8.3	2.9	0	2.9	2.6	1.4	1.4	5.2	8.4	4.2	2.9	2.8	11.2	6.8	4.3	9.8	4.2		122		Q9WUA3	13629369	56421	Pfkp	Q9WUA3
361	ATP-dependent RNA helicase A OS=Mus musculus GN=Dhx9 PE=1 SV=2	ATP-dependent RNA helicase A OS=Mus musculus GN=Dhx9 PE=1 SV=2	DFVNYLVR-DINTDFLLVVLR-DVVLAYPEVR-ELDALDANDELTPLGR-ETPFELIEALLK-FSDHVALLSVFQAWDDAR-GMTLVTPLQLLLFASK-ISAVAVAER-KEEQEVQATLESEEVDLNAGLHGNWTLENAK-KVFDPVPDGVTK-LAAQSCALSLVR-LFTAHNNMTNYATVWASK-LGGIGQFLAK-LNQYFQK-LSMSQLNEK-NELTYQMEQDHNLQSVLQER-NFLYAWCGK-QLYHLGVIEAYSGLTK-RISAVAVAER-TPLHEIALSIK-TTQVPQYILDDFIQNDR-VFDPVPDGVTK-VQSDGQIVFIDDWIR-YPSPFFVFGEK-YQILPLHSQIPR	25	25	25	>sp|O70133|DHX9_MOUSE ATP-dependent RNA helicase A OS=Mus musculus GN=Dhx9 PE=1 SV=2	1	25	25	25	22.6	22.6	22.6	149.47	1380	181.53	17	12.4	17	13.5	16.2	13.4	17.8	19.4	11.4	13	18.4	11.5	10.5	8.1	14.1	18.3	8.8	11	9.5	18.9	10.9	12.2	20.1	14		12;244	747;1061	O70133	71153505	13211	Dhx9	O70133
362	ATP-dependent RNA helicase DDX1 OS=Mus musculus GN=Ddx1 PE=1 SV=1	ATP-dependent RNA helicase DDX1 OS=Mus musculus GN=Ddx1 PE=1 SV=1	ALIVEPSR-ALIVEPSRELAEQTLNNVK-DGFVALSK-DLGLAFEIPAHIK-DQLSVLDNGVDIVVGTPGR-EAQTSFLHLGYLPNQLFR-ELAEQTLNNVK-ELLIIGGVAAR-FLICTDVAAR-FLPNAPK-FLVLDEADGLLSQGYSDFINR-GHVDVLAPTVQELAALEK-GIDIHGVPYVINVTLPDEK-LNLSQVR-TGAFSIPVIQIVYETLKDQQEGK	15	15	15	>sp|Q91VR5|DDX1_MOUSE ATP-dependent RNA helicase DDX1 OS=Mus musculus GN=Ddx1 PE=1 SV=1	1	15	15	15	26.1	26.1	26.1	82.499	740	91.031	25	12.3	22.7	19.7	18.8	14.2	18.2	17	15.8	10	7.4	9.5	11.9	6.9	18.4	17	15.3	8.4	9.7	19.7	13.6	12.4	24.7	22.3		571		Q91VR5	76364170	104721	Ddx1	Q91VR5
363	ATP-dependent RNA helicase DDX19A OS=Mus musculus GN=Ddx19a PE=2 SV=2	ATP-dependent RNA helicase DDX19A OS=Mus musculus GN=Ddx19a PE=2 SV=2	EEETLDTIK-SNLVDNTNQVEVLQR-SNLVDNTNQVEVLQRDPSSPLYSVK-VVPDPNIIK	4	4	4	>sp|Q61655|DD19A_MOUSE ATP-dependent RNA helicase DDX19A OS=Mus musculus GN=Ddx19a PE=2 SV=2	1	4	4	4	9	9	9	53.932	478	5.537	6.9	9	1.9	3.8	9	5.2	9	5	7.1	0	3.8	7.1	0	0	1.9	3.8	6.9	0	7.1	7.1	1.9	3.1	1.9	3.8				Q61655	341940430	13680	Ddx19a	Q61655
364	ATP-dependent RNA helicase DDX39A OS=Mus musculus GN=Ddx39a PE=2 SV=1	ATP-dependent RNA helicase DDX39A OS=Mus musculus GN=Ddx39a PE=2 SV=1	CMALAQLLVEQNFPAIAIHR-GLAVTFVSDENDAK-VSVFFGGLSIK	12	3	3	>sp|Q8VDW0|DX39A_MOUSE ATP-dependent RNA helicase DDX39A OS=Mus musculus GN=Ddx39a PE=2 SV=1	1	12	3	3	27.4	10.5	10.5	49.067	427	153.27	20.1	16.2	21.8	21.8	21.8	21.8	22.7	21.8	22.7	19.4	22.7	21.8	19.7	13.8	21.8	21.8	15.7	18.3	22.7	25.5	22.5	20.1	21.8	19.2		299		Q8VDW0	61213001	68278	Ddx39a	Q8VDW0
365	ATP-dependent RNA helicase DDX3X OS=Mus musculus GN=Ddx3x PE=1 SV=3; Putative ATP-dependent RNA helicase Pl10 OS=Mus musculus GN=D1Pas1 PE=2 SV=1; Probable ATP-dependent RNA helicase DDX4 OS=Mus musculus GN=Ddx4 PE=1 SV=2	ATP-dependent RNA helicase DDX3X OS=Mus musculus GN=Ddx3x PE=1 SV=3; Putative ATP-dependent RNA helicase Pl10 OS=Mus musculus GN=D1Pas1 PE=2 SV=1	QSSGASSSSFSSSR-TAAFLLPILSQIYADGPGEALR-VRPCVVYGGAEIGQQIR-DSLTLVFVETK-SPILVATAVAAR-DFLDEYIFLAVGR-DLLDLLVEAK-ELAVQIYEEAR-ELAVQIYEEARK-FSGGFGAR-HVINFDLPSDIEEYVHR-KQYPISLVLAPTR-LEQELFSGGNTGINFEK-QYPISLVLAPTR-SFLLDLLNATGK-VGNLGLATSFFNER-VGSTSENITQK-YLVLDEADR	18;14;1	18;14;1	4;1;0	>sp|Q62167|DDX3X_MOUSE ATP-dependent RNA helicase DDX3X OS=Mus musculus GN=Ddx3x PE=1 SV=3;>sp|P16381|DDX3L_MOUSE Putative ATP-dependent RNA helicase Pl10 OS=Mus musculus GN=D1Pas1 PE=2 SV=1	3	18	18	4	32	32	9.8	73.101	662	165.76	22.7	17.2	23.6	21.3	19.3	25.8	26.4	26.4	13.7	23.4	10	24.8	20.1	13.9	21.8	28.4	27.5	16.3	18.9	28.1	14.8	24.5	21.9	25.1		298		Q62167	2500528	13205	Ddx3x	Q62167
366	ATP-dependent RNA helicase DDX3Y OS=Mus musculus GN=Ddx3y PE=1 SV=2	ATP-dependent RNA helicase DDX3Y OS=Mus musculus GN=Ddx3y PE=1 SV=2	TAAFLLPILSQIYTDGPGEALK	15	1	1	>sp|Q62095|DDX3Y_MOUSE ATP-dependent RNA helicase DDX3Y OS=Mus musculus GN=Ddx3y PE=1 SV=2	1	15	1	1	25.7	3.3	3.3	73.427	658	83.629	18.8	12.9	16	16.3	18.8	21.6	20.1	16.7	8.7	21.7	8.2	15	16.3	7.4	16.7	24.2	23.7	14.6	14.6	21.7	13.1	22.8	17.6	20.8				Q62095	73620958	26900	Ddx3y	Q62095
367	ATP-dependent RNA helicase DDX42 OS=Mus musculus GN=Ddx42 PE=1 SV=3	ATP-dependent RNA helicase DDX42 OS=Mus musculus GN=Ddx42 PE=1 SV=3	DILIDPIR-DIPVLVATDVAAR-GVAYTLLTPK	3	3	3	>sp|Q810A7|DDX42_MOUSE ATP-dependent RNA helicase DDX42 OS=Mus musculus GN=Ddx42 PE=1 SV=3	1	3	3	3	3.3	3.3	3.3	101.96	929	2.9329	0.9	1.1	1.4	0	1.1	0	1.4	1.1	0	0	1.1	2.5	0	0	1.4	0	1.1	0	1.4	0	1.4	1.1	1.4	1.4				Q810A7	123796460	72047	Ddx42	Q810A7
368	AT-rich interactive domain-containing protein 1A OS=Mus musculus GN=Arid1a PE=1 SV=1	AT-rich interactive domain-containing protein 1A OS=Mus musculus GN=Arid1a PE=1 SV=1	LSIQDNNVDLILATPPFSR	2	1	1	>sp|A2BH40|ARI1A_MOUSE AT-rich interactive domain-containing protein 1A OS=Mus musculus GN=Arid1a PE=1 SV=1	1	2	1	1	1.1	0.8	0.8	242.09	2283	3.0414	0	1.1	0.8	0	0	0.3	0.8	1.1	0.3	0.3	0	0	0.3	0.3	0.3	0.3	0	0.3	0	0.3	0.3	0	0.3	0.3				A2BH40	288561880	93760	Arid1a	A2BH40
369	Axin interactor, dorsalization-associated protein OS=Mus musculus GN=Aida PE=1 SV=1	Axin interactor, dorsalization-associated protein OS=Mus musculus GN=Aida PE=1 SV=1	DLNGIDLTPVQDTPVASR-SAALQSTQSQEEFKLEDLK-VPGTLLPR	3	3	3	>sp|Q8C4Q6|AIDA_MOUSE Axin interactor, dorsalization-associated protein OS=Mus musculus GN=Aida PE=1 SV=1	1	3	3	3	14.8	14.8	14.8	34.888	305	4.8283	8.5	12.1	14.8	12.1	12.1	6.2	12.1	12.1	12.1	0	12.1	12.1	0	0	12.1	12.1	2.6	0	5.9	12.1	0	0	5.9	0				Q8C4Q6	81898829	108909	Aida	Q8C4Q6
371	BAG family molecular chaperone regulator 2 OS=Mus musculus GN=Bag2 PE=1 SV=1	BAG family molecular chaperone regulator 2 OS=Mus musculus GN=Bag2 PE=1 SV=1	FLDDLGNAK-LLESLDQLELR	2	2	2	>sp|Q91YN9|BAG2_MOUSE BAG family molecular chaperone regulator 2 OS=Mus musculus GN=Bag2 PE=1 SV=1	1	2	2	2	9.5	9.5	9.5	23.473	210	3.4342	0	0	0	5.2	0	4.3	0	0	5.2	5.2	0	0	0	0	5.2	5.2	4.3	0	0	5.2	5.2	5.2	0	0				Q91YN9	62899807	213539	Bag2	Q91YN9
372	Band 3 anion transport protein OS=Mus musculus GN=Slc4a1 PE=1 SV=1	Band 3 anion transport protein OS=Mus musculus GN=Slc4a1 PE=1 SV=1	AAATLMTER-ALLNLVPVQK-ANFLEKPVLGFVR-ASGPGAAAQIQEVK-ELELQCLDGDDAK-GGPGDEDDPLRR-GWVIHPLGLYR-IFGGLIR-IPPDSETTLVLVGR-LILPLIFR-LSVPDGLK-NQELQWVEAAHWIGLEENLR-NSTYFPGK-RYLPSPAKPDPNLYNTLDLNGGK-SGGASEPLLPHQPSLETQLYCGQAEGGSEGPSTSGTLK-SHAEDLGNLEGVKPAVLTR-SLESFLDCSLVLPPTDAPSEK-STPASLALPFVLILTVPLR-YLPSPAKPDPNLYNTLDLNGGK	19	19	19	>sp|P04919|B3AT_MOUSE Band 3 anion transport protein OS=Mus musculus GN=Slc4a1 PE=1 SV=1	1	19	19	19	28.7	28.7	28.7	103.13	929	240.98	5.6	13.9	21	18.5	17	16.9	21.1	12.7	22.1	12.6	15.8	7	14.4	14.2	21.1	26.6	18.1	24.4	14.7	23.3	14.5	14.6	22.5	19.1		215;330;903	302	P04919	114788	20533	Slc4a1	P04919
373	Band 4.1-like protein 1 OS=Mus musculus GN=Epb41l1 PE=1 SV=2	Band 4.1-like protein 1 OS=Mus musculus GN=Epb41l1 PE=1 SV=2	DAVFLKDNHLAIER	2	1	1	>sp|Q9Z2H5|E41L1_MOUSE Band 4.1-like protein 1 OS=Mus musculus GN=Epb41l1 PE=1 SV=2	1	2	1	1	3.3	1.6	1.6	98.314	879	4.2463	1.7	1.7	0	0	0	0	1.7	0	1.7	1.7	0	1.7	1.7	0	1.7	0	1.7	0	1.7	3.3	0	1.7	1.7	1.7				Q9Z2H5	134047752	13821	Epb41l1	Q9Z2H5
374	Band 4.1-like protein 2 OS=Mus musculus GN=Epb41l2 PE=1 SV=2	Band 4.1-like protein 2 OS=Mus musculus GN=Epb41l2 PE=1 SV=2	DYFGLLFQDHPEQK-EAAVPDAVPDR-EASTLIDRPAPQFER-EVPIVQTETK-EVQTSELKAEVASQK-FYPPDPSQLTEDITR-GLSPAQADSQFLENAK-IVITGDAALDHDQALAQAIR-LVSPEQPPK-NLPWLFTFNVK-QAGASVLPVETEAQEHVVAQK-SLDGAPIGVVDQSPPGEGSVPGPGVISYTTIQDGR-SSVETQPAEEVR-SSVETQPAEEVRK-SYNLVVAK-VRPAELEQFESTIGFK-FLTLGSK-NWLDPAK	18	18	16	>sp|O70318|E41L2_MOUSE Band 4.1-like protein 2 OS=Mus musculus GN=Epb41l2 PE=1 SV=2	1	18	18	16	24.6	24.6	23.2	109.94	988	65.957	20.7	20.9	19.6	10.4	23.1	15.1	19.7	18.7	12.6	16.5	24.6	12.7	15	8.7	16.4	16.9	11.4	7.8	10.7	17.7	15.1	18.7	21.6	12.1				O70318	408360068	13822	Epb41l2	O70318
375	Band 4.1-like protein 3 OS=Mus musculus GN=Epb41l3 PE=1 SV=1	Band 4.1-like protein 3 OS=Mus musculus GN=Epb41l3 PE=1 SV=1	ASALIDRPAPYFER-DSVSAAEVGTGQYATTK-GISQTNLITTVTPEKK-TEPVEAEVESTPHPQPLSTEK-TFLETSTETALTNEWEK-VESTSVGSISPGGAK-VLQETILVEER	9	7	7	>sp|Q9WV92|E41L3_MOUSE Band 4.1-like protein 3 OS=Mus musculus GN=Epb41l3 PE=1 SV=1	1	9	7	7	13.5	11.9	11.9	103.34	929	18.506	8.9	5	9.1	9.1	10.2	5.8	10.2	8.4	3	7.2	6.1	8.4	4.3	0.8	3	7.9	1.5	5.4	9.1	8.6	7.6	8.4	7.1	9.1				Q9WV92	20138079	13823	Epb41l3	Q9WV92
376	Barrier-to-autointegration factor OS=Mus musculus GN=Banf1 PE=1 SV=1	Barrier-to-autointegration factor OS=Mus musculus GN=Banf1 PE=1 SV=1	AYVVLGQFLVLK-DCFGCLR-DFVAEPMGEKPVGSLAGIGDVLSK	3	3	3	>sp|O54962|BAF_MOUSE Barrier-to-autointegration factor OS=Mus musculus GN=Banf1 PE=1 SV=1	1	3	3	3	48.3	48.3	48.3	10.102	89	21.427	48.3	27	13.5	13.5	48.3	40.4	13.5	40.4	21.3	40.4	40.4	13.5	40.4	13.5	13.5	21.3	13.5	21.3	40.4	40.4	13.5	13.5	13.5	40.4		77;80	15	O54962	5915763	23825	Banf1	O54962
377	Basal cell adhesion molecule OS=Mus musculus GN=Bcam PE=2 SV=1	Basal cell adhesion molecule OS=Mus musculus GN=Bcam PE=2 SV=1	AGAAGTSEATSSVR-EASGLYSLTSTLYLR-GDTPAEPPFEGR	3	3	3	>sp|Q9R069|BCAM_MOUSE Basal cell adhesion molecule OS=Mus musculus GN=Bcam PE=2 SV=1	1	3	3	3	6.6	6.6	6.6	67.669	622	3.3605	2.3	2.4	0	0	0	0	4.7	0	0	0	0	0	0	0	0	0	0	0	2.3	2.4	0	1.9	0	0				Q9R069	81917766	57278	Bcam	Q9R069
378	Basement membrane-specific heparan sulfate proteoglycan core protein OS=Mus musculus GN=Hspg2 PE=1 SV=1	Basement membrane-specific heparan sulfate proteoglycan core protein OS=Mus musculus GN=Hspg2 PE=1 SV=1	AAGVPSASITWR-AEMLQALASLEAVLLQTVYNTK-AFAYLQVPER-AMDFNGILTIR-ATFSSVPR-CAATNAAGTTQSHVLLLVQALPQISTPPEIR-DIIYIGGAPDVATLTR-DITLECISSGEPR-DPSPGQPSNFIVPFQEQAWQRPDGQPATR-EDGRPLPSSAQQR-EHLLMALADLDELLVR-ESLEVQIHPSR-FLVHDAFWALPK-FQGLDLNEELYLGGYPDYGAIPK-GSIQVDGEDLVTGR-HPTPLALGQFHTVTLLR-IAHVELADAGQYR-IEGNTLVIPR-KIPGDQIVSVVFIK-LDVEFKPLEPNGILLFSGGK-LEPTVPEDSGR-LRSPVISIEPPSSTVQQGQDASFK-LSFDQPNDFK-LSFSNFAHLGQESFYW…	40	40	40	>sp|Q05793|PGBM_MOUSE Basement membrane-specific heparan sulfate proteoglycan core protein OS=Mus musculus GN=Hspg2 PE=1 SV=1	1	40	40	40	15.8	15.8	15.8	398.29	3707	233.16	5.3	8.3	7.8	8.9	10.4	6	11.2	10.8	10	7.9	9.9	6.7	5.9	2.6	7.4	12.9	8	9	8	12.5	7.1	8.1	12.1	9.5		1792;2456;2876	682;1483;1818	Q05793	1172451	15530	Hspg2	Q05793
379	Basic leucine zipper and W2 domain-containing protein 1 OS=Mus musculus GN=Bzw1 PE=1 SV=1	Basic leucine zipper and W2 domain-containing protein 1 OS=Mus musculus GN=Bzw1 PE=1 SV=1	AEVLSEEPILK-DINAVAASLR-EGVSAAFAVK-ELQEQMSR-ELSEYVR-FLDASGAK-GDPFKDIILYVK-QYSPLLAAFTTQGQSELTLLLK-YFTEAGLK-IVVLFYK	10	10	9	>sp|Q9CQC6|BZW1_MOUSE Basic leucine zipper and W2 domain-containing protein 1 OS=Mus musculus GN=Bzw1 PE=1 SV=1	1	10	10	9	24.6	24.6	22.9	48.043	419	65.967	19.1	15.5	13.8	13.4	13.4	9.5	8.6	11	8.6	13.4	15	9.1	8.4	7.2	12.2	9.5	2.6	4.3	10.3	16.2	6.2	11.9	16.7	11			265	Q9CQC6	81880371	66882	Bzw1	Q9CQC6
380	Basic leucine zipper and W2 domain-containing protein 2 OS=Mus musculus molossinus GN=Bzw2 PE=2 SV=1; Basic leucine zipper and W2 domain-containing protein 2 OS=Mus musculus GN=Bzw2 PE=1 SV=1	Basic leucine zipper and W2 domain-containing protein 2 OS=Mus musculus molossinus GN=Bzw2 PE=2 SV=1; Basic leucine zipper and W2 domain-containing protein 2 OS=Mus musculus GN=Bzw2 PE=1 SV=1	ADVLSEEAILK-DTLVQGLNEAGDDLEAVAK-ELSDFLR-LLELFPVNR-NYAQVFNK-YFTDAGLKELSDFLR	7;7	6;6	6;6	>sp|Q2L4X1|BZW2_MUSMM Basic leucine zipper and W2 domain-containing protein 2 OS=Mus musculus molossinus GN=Bzw2 PE=2 SV=1;>sp|Q91VK1|BZW2_MOUSE Basic leucine zipper and W2 domain-containing protein 2 OS=Mus musculus GN=Bzw2 PE=1 SV=1	2	7	6	6	16.5	14.8	14.8	48.063	419	9.0321	11	3.6	5.7	5.7	3.6	3.6	5.7	5.7	5.7	5.7	10	5.7	5.7	1.7	3.8	1.7	0	5.7	5.7	11.9	3.8	5.7	5.7	4.1				Q2L4X1	119371243	---	Bzw2	Q2L4X1
381	Basigin OS=Mus musculus GN=Bsg PE=1 SV=2	Basigin OS=Mus musculus GN=Bsg PE=1 SV=2	KPDQTLDEDDPGAAPLK-RKPDQTLDEDDPGAAPLK-SDASYPPITDWFWFK-SEINVEGPPR-SGEYSCIFLPEPVGR-VLQEDTLPDLHTK-YIVDADDR-YVVVSTPEK	8	8	8	>sp|P18572|BASI_MOUSE Basigin OS=Mus musculus GN=Bsg PE=1 SV=2	1	8	8	8	22.6	22.6	22.6	42.444	389	24.561	8.2	13.4	2.6	6.9	9.5	9.5	13.4	9.5	11.6	12.1	15.2	10.8	4.9	2.6	11.6	10.8	10.8	13.1	9.3	9.5	9.5	4.9	9.5	9.5		203		P18572	51704260	12215	Bsg	P18572
382	B-cell antigen receptor complex-associated protein alpha chain OS=Mus musculus GN=Cd79a PE=1 SV=2	B-cell antigen receptor complex-associated protein alpha chain OS=Mus musculus GN=Cd79a PE=1 SV=2	GLQGTYQDVGNLHIGDAQLEKP-GLYWCQVIENNILK-VEGGPPSLTVNLGEEAR	3	3	3	>sp|P11911|CD79A_MOUSE B-cell antigen receptor complex-associated protein alpha chain OS=Mus musculus GN=Cd79a PE=1 SV=2	1	3	3	3	24.1	24.1	24.1	24.583	220	32.07	24.1	17.7	7.7	17.7	17.7	7.7	0	17.7	10	0	17.7	17.7	17.7	10	10	7.7	10	7.7	7.7	7.7	10	0	17.7	10		101		P11911	156630836	12518	Cd79a	P11911
383	B-cell antigen receptor complex-associated protein beta chain OS=Mus musculus GN=Cd79b PE=1 SV=1	B-cell antigen receptor complex-associated protein beta chain OS=Mus musculus GN=Cd79b PE=1 SV=1	GSQQPQELVSEEGR-WSVGEHPGQE	2	2	2	>sp|P15530|CD79B_MOUSE B-cell antigen receptor complex-associated protein beta chain OS=Mus musculus GN=Cd79b PE=1 SV=1	1	2	2	2	10.5	10.5	10.5	25.726	228	5.7115	10.5	6.1	6.1	10.5	10.5	0	10.5	10.5	6.1	0	10.5	6.1	10.5	10.5	6.1	6.1	0	6.1	6.1	6.1	6.1	0	6.1	6.1				P15530	114764	15985	Cd79b	P15530
384	B-cell receptor CD22 OS=Mus musculus GN=Cd22 PE=1 SV=1	B-cell receptor CD22 OS=Mus musculus GN=Cd22 PE=1 SV=1	ARLDNILLFQNYEFDK-AVTTVIQSFTPILEGDSVTLVCR-CSWALPVILNVHYAPR-LDNILLFQNYEFDK-LEIKVNPTEVEK-SQQGLQENSSGQSFFVR-TVAVSWFK-VSPASEIR-WNPQGSGSVLKPGVLR	9	9	9	>sp|P35329|CD22_MOUSE B-cell receptor CD22 OS=Mus musculus GN=Cd22 PE=1 SV=1	1	9	9	9	13.5	13.5	13.5	96.581	862	24.666	9	10	10.2	7.3	11.1	5.5	3.8	8.5	5.2	6.4	11.1	0.9	2.9	4.5	8.1	7.3	3.8	5.5	6.4	6.4	9.2	2.8	9.3	6.6		457;506		P35329	461664	12483	Cd22	P35329
385	B-cell receptor-associated protein 31 OS=Mus musculus GN=Bcap31 PE=1 SV=4	B-cell receptor-associated protein 31 OS=Mus musculus GN=Bcap31 PE=1 SV=4	LVTLISQQATLLASNEAFK-LVTLISQQATLLASNEAFKK-QSEGLTKEYDR	3	3	3	>sp|Q61335|BAP31_MOUSE B-cell receptor-associated protein 31 OS=Mus musculus GN=Bcap31 PE=1 SV=4	1	3	3	3	12.7	12.7	12.7	27.956	245	9.7024	7.8	0	8.2	12.7	7.8	8.2	0	8.2	7.8	8.2	8.2	8.2	0	7.8	0	7.8	0	8.2	0	12.7	8.2	0	7.8	8.2				Q61335	408360329	27061	Bcap31	Q61335
386	B-cell scaffold protein with ankyrin repeats OS=Mus musculus GN=Bank1 PE=1 SV=3	B-cell scaffold protein with ankyrin repeats OS=Mus musculus GN=Bank1 PE=1 SV=3	EIPYYEFK-GTDVLASLRPSVPR-LLIISNSLLK-QILDQGPEDYLEVSIPTDSR-SIEELDNVLASIFK	5	5	5	>sp|Q80VH0|BANK1_MOUSE B-cell scaffold protein with ankyrin repeats OS=Mus musculus GN=Bank1 PE=1 SV=3	1	5	5	5	8.4	8.4	8.4	89.405	783	9.1249	7.4	4.6	4.6	7.4	7.4	3.1	8.4	7.4	5.6	1.8	1.8	3.1	2.8	1.8	1.3	0	1.8	1.8	3.1	1.8	4.9	1.8	3.6	4.9				Q80VH0	341940579	242248	Bank1	Q80VH0
387	Bcl-2 homologous antagonist/killer OS=Mus musculus GN=Bak1 PE=1 SV=2	Bcl-2 homologous antagonist/killer OS=Mus musculus GN=Bak1 PE=1 SV=2	GGWVAALNFR-IASSLFK-LALYVYQR-QLALIGDDINR-QLALIGDDINRR	5	5	5	>sp|O08734|BAK_MOUSE Bcl-2 homologous antagonist/killer OS=Mus musculus GN=Bak1 PE=1 SV=2	1	5	5	5	17.8	17.8	17.8	23.334	208	7.4428	10.6	10.6	10.6	13.9	9.1	9.1	0	13.9	13.9	8.7	0	5.8	3.8	4.8	13.9	13.9	9.1	13.9	8.7	13.5	13.9	10.1	13.5	9.1				O08734	408359981	---	Bak1	O08734
388	Bcl-2-associated transcription factor 1 OS=Mus musculus GN=Bclaf1 PE=1 SV=2	Bcl-2-associated transcription factor 1 OS=Mus musculus GN=Bclaf1 PE=1 SV=2	SPAVTLNER-TITPQNAPR	2	2	2	>sp|Q8K019|BCLF1_MOUSE Bcl-2-associated transcription factor 1 OS=Mus musculus GN=Bclaf1 PE=1 SV=2	1	2	2	2	2	2	2	106	919	3.4725	1	2	1	1	0	2	2	1	1	1	1	1	1	0	0	1	1	0	2	0	0	1	2	0				Q8K019	47605501	72567	Bclaf1	Q8K019
389	Bcl-2-like protein 13 OS=Mus musculus GN=Bcl2l13 PE=1 SV=2	Bcl-2-like protein 13 OS=Mus musculus GN=Bcl2l13 PE=1 SV=2	AEGAAQLSEER-ALQTILSQPVTYEAYR-QQGPSPPGVQLDVAPQSLNPEVLLK-YVVLSYLGLLSQEK	4	4	4	>sp|P59017|B2L13_MOUSE Bcl-2-like protein 13 OS=Mus musculus GN=Bcl2l13 PE=1 SV=2	1	4	4	4	15.2	15.2	15.2	46.719	434	12.919	12	5.8	0	9.4	9.4	9.4	9.4	9.4	15.2	9.4	9.4	12	5.8	3.7	9.4	9.4	8.3	5.8	6.2	12	5.8	5.8	5.8	5.8				P59017	341940267	94044	Bcl2l13	P59017
390	Beta-1,4 N-acetylgalactosaminyltransferase 1 OS=Mus musculus GN=B4galnt1 PE=2 SV=1	Beta-1,4 N-acetylgalactosaminyltransferase 1 OS=Mus musculus GN=B4galnt1 PE=2 SV=1	GGSLPLPFLR-LDLLDLAPEPR-SLADQLLIAPANSPLQYPLQGVEVQPLR	3	3	3	>sp|Q09200|B4GN1_MOUSE Beta-1,4 N-acetylgalactosaminyltransferase 1 OS=Mus musculus GN=B4galnt1 PE=2 SV=1	1	3	3	3	9.2	9.2	9.2	59.211	533	6.1956	3.9	3.9	0	0	1.9	9.2	2.1	3.9	0	7.1	0	7.3	1.9	1.9	0	0	7.3	3.9	7.3	1.9	9.2	7.1	0	9.2				Q09200	1168737	14421	B4galnt1	Q09200
391	Beta-2-glycoprotein 1 OS=Mus musculus GN=Apoh PE=1 SV=1	Beta-2-glycoprotein 1 OS=Mus musculus GN=Apoh PE=1 SV=1	ICPKPDDLPFATVVPLK-ITCPPPPVPK-TSYDPGEQIVYSCKPGYVSR-VCPFAGILENGIVR	4	4	4	>sp|Q01339|APOH_MOUSE Beta-2-glycoprotein 1 OS=Mus musculus GN=Apoh PE=1 SV=1	1	4	4	4	17.7	17.7	17.7	38.618	345	25.337	13.6	5.8	4.9	4.9	5.8	0	0	0	4.9	0	0	10.7	4.9	0	0	0	10.7	5.8	4.1	17.7	7.8	4.9	0	0		23;51;84;142		Q01339	231558	11818	Apoh	Q01339
392	Beta-2-microglobulin OS=Mus musculus GN=B2m PE=1 SV=2	Beta-2-microglobulin OS=Mus musculus GN=B2m PE=1 SV=2	TPQIQVYSR-VEMSDMSFSK	2	2	2	>sp|P01887|B2MG_MOUSE Beta-2-microglobulin OS=Mus musculus GN=B2m PE=1 SV=2	1	2	2	2	16	16	16	13.779	119	73.138	16	7.6	7.6	7.6	7.6	7.6	16	7.6	16	7.6	7.6	16	7.6	7.6	0	16	8.4	7.6	7.6	7.6	0	0	16	16			71;74	P01887	408359979	12010	B2m	P01887
393	Beta-2-syntrophin OS=Mus musculus GN=Sntb2 PE=1 SV=2	Beta-2-syntrophin OS=Mus musculus GN=Sntb2 PE=1 SV=2	AGLVELLLR-EVSLGCTLSGQEVR-KPSLVSDLPWEGASPQSPSFSGSEDSGSPK-LGDAILSVNGTDLR-SPSLGSDLTFATR	5	5	5	>sp|Q61235|SNTB2_MOUSE Beta-2-syntrophin OS=Mus musculus GN=Sntb2 PE=1 SV=2	1	5	5	5	15.4	15.4	15.4	56.381	520	23.808	10	8.3	9.6	6.9	12.7	9.6	9.6	12.7	9.6	10	11	12.7	2.5	0	1.7	6.9	10	2.5	12.7	10.2	12.7	10	10	4.2		430		Q61235	23822163	20650	Sntb2	Q61235
394	Beta-actin-like protein 2 OS=Mus musculus GN=Actbl2 PE=1 SV=1	Beta-actin-like protein 2 OS=Mus musculus GN=Actbl2 PE=1 SV=1	QEYDEAGPPIVHR-VAPDEHPILLTEAPLNPK	11	2	2	>sp|Q8BFZ3|ACTBL_MOUSE Beta-actin-like protein 2 OS=Mus musculus GN=Actbl2 PE=1 SV=1	1	11	2	2	35.9	8.2	8.2	42.004	376	323.31	30.9	26.1	25.5	21.3	26.1	29	26.1	26.1	24.5	30.6	30.6	26.1	31.6	25.5	19.7	25.8	19.1	32.2	26.1	32.2	23.9	27.7	32.2	27.4				Q8BFZ3	81895966	238880	Actbl2	Q8BFZ3
395	Beta-adducin OS=Mus musculus GN=Add2 PE=1 SV=4	Beta-adducin OS=Mus musculus GN=Add2 PE=1 SV=4	HKSEVEIPATVTAFVFEEDGVPVPALR-SAGPQSQLLASVIAEK-SEVEIPATVTAFVFEEDGVPVPALR-VNILGEVVEK-VNVADEVQR-WLNTPNTYLR	7	6	6	>sp|Q9QYB8|ADDB_MOUSE Beta-adducin OS=Mus musculus GN=Add2 PE=1 SV=4	1	7	6	6	11	9.9	9.9	80.641	725	15.619	0	0	0	0	2.3	5	3.7	0	0	3.3	0	0	0	0	1.2	7.3	11	0	7.2	7.2	1.2	0	7.2	4.7			371	Q9QYB8	14916528	11519	Add2	Q9QYB8
396	Beta-adrenergic receptor kinase 1 OS=Mus musculus GN=Adrbk1 PE=1 SV=2	Beta-adrenergic receptor kinase 1 OS=Mus musculus GN=Adrbk1 PE=1 SV=2	ILLPEPSIR-LGYLLFR-LLDSDQELYR-NFPLTISER-ISDLGLACDFSK-SLLEGLLQR-YFYLFPNR	7	7	4	>sp|Q99MK8|ARBK1_MOUSE Beta-adrenergic receptor kinase 1 OS=Mus musculus GN=Adrbk1 PE=1 SV=2	1	7	7	4	9.3	9.3	5.1	79.638	689	10.228	4.4	4.2	6.8	2.3	5.1	3.6	6.5	6.1	1.3	2.3	1	2.6	0	4.4	3.5	4.2	1	0	5.4	3	1.3	1.3	2.3	3.9		340		Q99MK8	47605537	---	Adrbk1	Q99MK8
397	Beta-adrenergic receptor kinase 2 OS=Mus musculus GN=Adrbk2 PE=2 SV=2	Beta-adrenergic receptor kinase 2 OS=Mus musculus GN=Adrbk2 PE=2 SV=2	ELLSSTHQFSK-WQQEVVETIYDAVNADTDK	5	2	2	>sp|Q3UYH7|ARBK2_MOUSE Beta-adrenergic receptor kinase 2 OS=Mus musculus GN=Adrbk2 PE=2 SV=2	1	5	2	2	8.6	4.4	4.4	79.656	688	7.847	1.7	2.9	4.2	0	1.3	1.3	4.2	2.5	0	0	2.8	0	0	3.1	2.5	2.9	1.6	0	1.7	5.8	1.3	0	1.3	2.9		340		Q3UYH7	378405149	320129	Adrbk2	Q3UYH7
398	Beta-arrestin-1 OS=Mus musculus GN=Arrb1 PE=1 SV=1	Beta-arrestin-1 OS=Mus musculus GN=Arrb1 PE=1 SV=1	DFVDHIDLVDPVDGVVLVDPEYLK-EVPESETPVDTNLIELDTNDDDIVFEDFAR-KVQYAPERPGPQPTAETTR-VQYAPERPGPQPTAETTR-VYTLTPFLANNR-YGREDLDVLGLTFR-LTVYLGK	7	7	6	>sp|Q8BWG8|ARRB1_MOUSE Beta-arrestin-1 OS=Mus musculus GN=Arrb1 PE=1 SV=1	1	7	7	6	25.4	25.4	23.7	46.972	418	56.317	12	1.7	0	12	12	12	12	12	12	10.3	20.8	12	0	0	5.7	5.7	5.7	7.4	10.3	10.3	10.3	8.6	12	12				Q8BWG8	59797945	109689	Arrb1	Q8BWG8
399	Beta-arrestin-2 OS=Mus musculus GN=Arrb2 PE=1 SV=1	Beta-arrestin-2 OS=Mus musculus GN=Arrb2 PE=1 SV=1	GLALDGQLK-KVQFAPETPGPQPSAETTR-VYTITPLLSDNR-YGREDLDVLGLSFR	5	4	4	>sp|Q91YI4|ARRB2_MOUSE Beta-arrestin-2 OS=Mus musculus GN=Arrb2 PE=1 SV=1	1	5	4	4	14.9	13.2	13.2	46.313	410	10.173	5.1	3.9	0	5.1	1.7	1.7	1.7	1.7	7.3	4.6	11	7.3	0	2.2	3.4	7.6	0	1.7	5.1	0	0	0	1.7	1.7				Q91YI4	20137384	216869	Arrb2	Q91YI4
400	Beta-catenin-like protein 1 OS=Mus musculus GN=Ctnnbl1 PE=2 SV=1	Beta-catenin-like protein 1 OS=Mus musculus GN=Ctnnbl1 PE=2 SV=1	FVDILGLR-GEGLQLMNLMLR-ILALLENF-YLSAMQVADK	4	4	4	>sp|Q9CWL8|CTBL1_MOUSE Beta-catenin-like protein 1 OS=Mus musculus GN=Ctnnbl1 PE=2 SV=1	1	4	4	4	6.7	6.7	6.7	64.979	563	3.4415	1.4	1.4	1.4	1.4	1.4	1.4	1.4	1.4	2.8	1.4	1.4	1.4	1.4	1.4	1.4	1.4	1.4	3.2	1.4	1.4	1.4	5.3	1.4	1.4				Q9CWL8	47606347	66642	Ctnnbl1	Q9CWL8
401	Beta-centractin OS=Mus musculus GN=Actr1b PE=1 SV=1	Beta-centractin OS=Mus musculus GN=Actr1b PE=1 SV=1	AGFAGDQIPK-IWQYVYSK-LYSTWIGGSILASLDTFKK-TLFSNIVLSGGSTLFK-ACYLSINPQKDEALETEK-APELLFQPDLVGDESEGLHEVLAFAIHK-DQLQTFSEEHPVLLTEAPLNPSK-VQYTLPDGSTLDVGPAR	8	8	4	>sp|Q8R5C5|ACTY_MOUSE Beta-centractin OS=Mus musculus GN=Actr1b PE=1 SV=1	1	8	8	4	37	37	22.9	42.281	376	68.404	18.6	17	17	12.5	15.2	12.5	19.7	13.6	29.5	15.2	19.9	17	15.2	2.7	15.2	29.5	0	13	19.7	27.7	15.2	15.2	17	6.4		222		Q8R5C5	47115849	226977	Actr1b	Q8R5C5
402	Beta-enolase OS=Mus musculus GN=Eno3 PE=1 SV=3	Beta-enolase OS=Mus musculus GN=Eno3 PE=1 SV=3	DATNVGDEGGFAPNILENNEALELLK-HIADLAGNPDLVLPVPAFNVINGGSHAGNK-TLGPALLEK	6	3	3	>sp|P21550|ENOB_MOUSE Beta-enolase OS=Mus musculus GN=Eno3 PE=1 SV=3	1	6	3	3	27.4	15	15	47.024	434	291.85	25.3	18.4	19.4	19.4	19.4	25.3	19.4	20.3	21.4	12.4	25.3	25.3	4.1	7.4	19.4	19.4	0	9.2	12.4	25.3	7.4	19.4	12.4	19.4		389	368	P21550	119344	13808	Eno3	P21550
403	Beta-galactosidase OS=Mus musculus GN=Glb1 PE=2 SV=1	Beta-galactosidase OS=Mus musculus GN=Glb1 PE=2 SV=1	AYVSVDGVPQGILDR-QYFGYVLYR-SLYPLTFTQVK-SSDPDYLVAVDKWLAVLLPK-TLATSLYNLLAR-WLAVLLPK-YHLGNDVILFTTDGASEK	7	7	7	>sp|P23780|BGAL_MOUSE Beta-galactosidase OS=Mus musculus GN=Glb1 PE=2 SV=1	1	7	7	7	13.1	13.1	13.1	73.12	647	28.009	11.3	1.7	6	9.6	8.5	8.2	9.6	8.5	9.6	11.3	11.3	8.2	11.3	1.7	5.9	10	11.3	9.9	11.3	11.4	11.3	9.6	9	13.1				P23780	114944	12091	Glb1	P23780
404	Beta-glucuronidase OS=Mus musculus GN=Gusb PE=2 SV=2	Beta-glucuronidase OS=Mus musculus GN=Gusb PE=2 SV=2	ALDLTRPVTFVSNAK-AVLENYHSVLDQK-FLINGKPFYFQGVNK-GFDWPLLVK-GYFVQDTSFDFFNYAGLHR-THQKPIIQSEYGADAIPGIHEDPPR-TSAFILR-VTTTESVTDYYTLPIGIR-WLGANSFR	9	9	9	>sp|P12265|BGLR_MOUSE Beta-glucuronidase OS=Mus musculus GN=Gusb PE=2 SV=2	1	9	9	9	19.9	19.9	19.9	74.194	648	24.775	15.6	15	10.3	17.9	12.3	16.7	18.7	15	10.3	12.7	5.7	14.7	11.4	10	15.4	16.4	12.3	7.4	13.7	17.9	10	15.3	13.3	15.6				P12265	408359984	110006	Gusb	P12265
405	Beta-hexosaminidase subunit alpha OS=Mus musculus GN=Hexa PE=2 SV=2	Beta-hexosaminidase subunit alpha OS=Mus musculus GN=Hexa PE=2 SV=2	ALLSAPWYLNR-EVIEYAR-GLETFSQLVWK-GSFNPVTHIYTAQDVK-GVLLDTSR-HYLPLSSILDTLDVMAYNK-KGSFNPVTHIYTAQDVK-VEPLAFHGTPEQK-VRPDTIIQVWR-YTLYPNNFQFR	10	10	10	>sp|P29416|HEXA_MOUSE Beta-hexosaminidase subunit alpha OS=Mus musculus GN=Hexa PE=2 SV=2	1	10	10	10	20.5	20.5	20.5	60.612	528	32.654	13.8	8.7	9.8	15.9	14.8	14.8	11.4	15.9	18.4	17.2	11.4	14.8	6.2	8.1	8.7	15.3	17.2	12.3	16.7	14.4	14.8	13.8	17.2	17.2			193	P29416	341940796	15211	Hexa	P29416
406	Beta-hexosaminidase subunit beta OS=Mus musculus GN=Hexb PE=2 SV=2	Beta-hexosaminidase subunit beta OS=Mus musculus GN=Hexb PE=2 SV=2	ANSVWGALR-FNVLHWHIVDDQSFPYQSTTFPELSNK-GILIDTSR-GSYSLSHVYTPNDVR-ILEIISSLK-LQPALWPFPR-MVLEYAR-NYYKVEPLNFEGSEK-QVTGSGFPAILSAPWYLDLISYGQDWK-VEPLNFEGSEK-VIPEFDTPGHTQSWGK-YYNYVFGFYK	12	12	12	>sp|P20060|HEXB_MOUSE Beta-hexosaminidase subunit beta OS=Mus musculus GN=Hexb PE=2 SV=2	1	12	12	12	28.5	28.5	28.5	61.115	536	29.137	13.2	9.9	10.1	15.7	11.9	18.5	17.7	18.5	17.4	9.9	6.3	11.8	8	8	11.4	24.3	7.5	18.5	13.8	17.2	10.6	7.8	13.1	17.7			252	P20060	1346280	15212	Hexb	P20060
407	Beta-mannosidase OS=Mus musculus GN=Manba PE=2 SV=1	Beta-mannosidase OS=Mus musculus GN=Manba PE=2 SV=1	GSNWIPADSFQDK-INGLPIFLK-LVSEYGYQSWPSFSTLEK	3	3	3	>sp|Q8K2I4|MANBA_MOUSE Beta-mannosidase OS=Mus musculus GN=Manba PE=2 SV=1	1	3	3	3	4.6	4.6	4.6	100.83	879	5.5889	2.5	3.1	1	1	4.6	2.5	2.5	3.1	1	1.5	0	2.5	1	1.5	1	1	0	1	1	3.1	1	1.5	3.5	1.5				Q8K2I4	81878533	110173	Manba	Q8K2I4
408	Beta-parvin OS=Mus musculus GN=Parvb PE=1 SV=1	Beta-parvin OS=Mus musculus GN=Parvb PE=1 SV=1	ARPEDVVNLDLK-DAFDTLFDHAPDKLNLVK-LNVAEVTQSEIGQK-QLEEDLYDGQVLQK-SLITFVNK-VLLDWINDVLAEER-VLYTLFTK	7	7	7	>sp|Q9ES46|PARVB_MOUSE Beta-parvin OS=Mus musculus GN=Parvb PE=1 SV=1	1	7	7	7	24.1	24.1	24.1	41.669	365	62.837	19.2	19.2	19.2	19.2	19.2	13.7	19.2	19.2	19.2	15.9	19.2	19.2	11.5	11.5	19.2	19.2	0	15.9	15.3	20.8	15.3	15.3	15.9	15.3				Q9ES46	20139163	170736	Parvb	Q9ES46
409	BH3-interacting domain death agonist OS=Mus musculus GN=Bid PE=1 SV=2	BH3-interacting domain death agonist OS=Mus musculus GN=Bid PE=1 SV=2	IEPDSESQEEIIHNIAR-QELEVLGR	2	2	2	>sp|P70444|BID_MOUSE BH3-interacting domain death agonist OS=Mus musculus GN=Bid PE=1 SV=2	1	2	2	2	12.8	12.8	12.8	21.951	195	3.0553	12.8	12.8	12.8	8.7	4.1	12.8	4.1	12.8	4.1	12.8	12.8	12.8	12.8	4.1	8.7	8.7	12.8	12.8	0	12.8	12.8	12.8	0	12.8				P70444	88984020	12122	Bid	P70444
410	Bifunctional coenzyme A synthase OS=Mus musculus GN=Coasy PE=1 SV=2	Bifunctional coenzyme A synthase OS=Mus musculus GN=Coasy PE=1 SV=2	ILGNLLQPPNERPELPSGLYVLGLTGISGSGK-ILTDIVWPVIAK-SGLLVLTTPLATLAAR	3	3	3	>sp|Q9DBL7|COASY_MOUSE Bifunctional coenzyme A synthase OS=Mus musculus GN=Coasy PE=1 SV=2	1	3	3	3	10.7	10.7	10.7	62.022	563	6.5281	5	2.8	2.8	2.8	5	5	10.7	5	8.5	5	5	5	5	0	2.8	10.7	5	2.1	8.5	10.7	2.8	5	10.7	10.7				Q9DBL7	32363507	71743	Coasy	Q9DBL7
411	Bifunctional epoxide hydrolase 2 OS=Mus musculus GN=Ephx2 PE=1 SV=2	Bifunctional epoxide hydrolase 2 OS=Mus musculus GN=Ephx2 PE=1 SV=2	AKPNEVVFLDDFGSNLKPAR-SIPVFNYQLYFQEPGVAEAELEK-VAAFDLDGVLALPSIAGAFR	3	3	3	>sp|P34914|HYES_MOUSE Bifunctional epoxide hydrolase 2 OS=Mus musculus GN=Ephx2 PE=1 SV=2	1	3	3	3	11.4	11.4	11.4	62.515	554	7.3596	11.4	3.6	3.6	3.6	3.6	7.2	7.8	3.6	7.2	3.6	0	3.6	4.2	3.6	0	7.8	3.6	0	0	3.6	3.6	3.6	7.8	7.8				P34914	1708375	13850	Ephx2	P34914
412	Bifunctional glutamate/proline--tRNA ligase OS=Mus musculus GN=Eprs PE=1 SV=4	Bifunctional glutamate/proline--tRNA ligase OS=Mus musculus GN=Eprs PE=1 SV=4	AALLNQHYQVNFK-ASKDQVDSAVQELLQLK-DQVDSAVQELLQLK-DYVPGQPPASQNSHSNPVSNAQPAGAEKPEAK-FYTLFGR-GDVSISVEEGKENLLR-KEENLAEWYSQVITK-LGVENCYFPIFVSQAALEK-LNLNNTVLSK-LTSAINELNHCLSLR-LTWFVNEGLVDGWDDPRFPTVR-NHIEDFAPEVAWVTR-NPDVGLKPVWYSPK-QFIAAQGSSR-SQGSGLSSGGAGEGQGPK-SSSNTVESTSLYNK-TGQEYKPGNPSAAAVQTVSTK-VAVQGDVVR-VIDPVAPR-VLEDIQLNLFTR-VSETVAFTDVNSILR-VTEAVECLLSLK-VYEELLAIPVVR-WFGFLEAQQAFR	24	24	24	>sp|Q8CGC7|SYEP_MOUSE Bifunctional glutamate/proline--tRNA ligase OS=Mus musculus GN=Eprs PE=1 SV=4	1	24	24	24	22.4	22.4	22.4	170.08	1512	103.35	12.8	13.4	10.4	12.5	11.2	12.3	16.1	13	7.3	12.2	14.3	10.2	8	2.8	9.9	11.3	8.9	5.8	10.3	15.7	8.7	11.3	11.6	14.9		856;1076		Q8CGC7	341942279	107508	Eprs	Q8CGC7
413	Bifunctional lysine-specific demethylase and histidyl-hydroxylase MINA OS=Mus musculus GN=Mina PE=1 SV=2	Bifunctional lysine-specific demethylase and histidyl-hydroxylase MINA OS=Mus musculus GN=Mina PE=1 SV=2	EFWEQKPLLIQR-IGTPTHDFLLKPGDLLYFPR-LYSPTVPLAHEYSVESEDR-YYQSLFSLSDLKR	4	4	4	>sp|Q8CD15|MINA_MOUSE Bifunctional lysine-specific demethylase and histidyl-hydroxylase MINA OS=Mus musculus GN=Mina PE=1 SV=2	1	4	4	4	13.8	13.8	13.8	53.516	465	3.5894	4.3	0	7.1	2.8	7.1	4.3	7.1	7.1	7.1	4.1	13.8	7.1	0	0	2.8	7.1	0	0	7.1	7.1	0	0	4.3	4.3				Q8CD15	160013499	67014	Mina	Q8CD15
414	Bifunctional methylenetetrahydrofolate dehydrogenase/cyclohydrolase, mitochondrial OS=Mus musculus GN=Mthfd2 PE=1 SV=1	Bifunctional methylenetetrahydrofolate dehydrogenase/cyclohydrolase, mitochondrial OS=Mus musculus GN=Mthfd2 PE=1 SV=1	AAAEVGINSETIVKPASVSEEELLNSIR-KLNNDENVDGLLVQLPLPEHIDER-LLRPTHGCHPR	3	3	3	>sp|P18155|MTDC_MOUSE Bifunctional methylenetetrahydrofolate dehydrogenase/cyclohydrolase, mitochondrial OS=Mus musculus GN=Mthfd2 PE=1 SV=1	1	3	3	3	18	18	18	37.863	350	4.9941	0	11.1	6.9	10	10	6.9	3.1	10	0	6.9	6.9	3.1	0	0	8	8	0	0	3.1	18	0	3.1	18	3.1				P18155	127443	17768	Mthfd2	P18155
415	Bifunctional polynucleotide phosphatase/kinase OS=Mus musculus GN=Pnkp PE=1 SV=2	Bifunctional polynucleotide phosphatase/kinase OS=Mus musculus GN=Pnkp PE=1 SV=2	FELPAFDPR-LFALNVGLPFATPEEFFLK-LGVPFQVLVATHAGLNR-LLVFTASGVKPQGK-LQEHLDPALQR-LWLQSPTGGPPPIFLPSDGQALVLGR-NQVELIADPESR-TISSAGPLYLPESSSLLSPNPEVVVAVGFPGAGK-VAAFDLDGTLITTR-VFPTSPSDWR-VVIDNTNPDVPSR	11	11	11	>sp|Q9JLV6|PNKP_MOUSE Bifunctional polynucleotide phosphatase/kinase OS=Mus musculus GN=Pnkp PE=1 SV=2	1	11	11	11	34.3	34.3	34.3	57.223	522	62.239	27.2	14.4	12.5	23.6	26.4	27.4	23.8	16.3	18.4	21.3	19.5	28.4	20.5	4	13.8	15.7	25.3	6.1	25.9	25.9	20.7	29.3	25.3	31.6				Q9JLV6	50401169	---	Pnkp	Q9JLV6
416	Bifunctional purine biosynthesis protein PURH OS=Mus musculus GN=Atic PE=1 SV=2	Bifunctional purine biosynthesis protein PURH OS=Mus musculus GN=Atic PE=1 SV=2	AFTHTAQYDEAISDYFR-ANSWWLR-APSQLALFSVSDK-APSQLALFSVSDKTGLVEFAR-DGQVIGIGAGQQSR-DLIVATVAVK-DLPESALR-DVSELTGFPEMLGGR-EVSDGIVAPGYEEEALK-EWVDKLSGVSVSSDAFFPFR-GAVDIPAAASFK-HVSPAGAAVGVPLSEDEAR-LDFNLVR-LSGVSVSSDAFFPFR-LSGVSVSSDAFFPFRDNVDR-MSSFGDFVALSDICDVPTAK-RAEISNAIDQYVTGTIGEGEDLVK-SGVAYIVAPSGSTADK-SLASLGLSLVASGGTAK-SLFSNIVTK-TGLVEFAR-TVASPDVTVEAAVEQIDIGGVTLLR-VCMVYDLYPTLTPLAVAYAR-VVVCNLYPFVK-WEALFEEVPE…	26	26	26	>sp|Q9CWJ9|PUR9_MOUSE Bifunctional purine biosynthesis protein PURH OS=Mus musculus GN=Atic PE=1 SV=2	1	26	26	26	57.9	57.9	57.9	64.217	592	300.11	51.7	30.9	42.9	50.7	52.2	45.8	46.8	37.8	48.3	45.1	28.4	47.6	43.9	22.1	37.5	51.7	48	31.2	44.8	48.8	37	46.6	48.1	40.9		101;287;325;434	60;288;312	Q9CWJ9	146345497	108147	Atic	Q9CWJ9
417	Biglycan OS=Mus musculus GN=Bgn PE=2 SV=1	Biglycan OS=Mus musculus GN=Bgn PE=2 SV=1	AYYNGISLFNNPVPYWEVQPATFR-DDFKGLQHLYALVLVNNK-EISPDTTLLDLQNNDISELR-EISPDTTLLDLQNNDISELRK-GLQHLYALVLVNNK-GVFSGLR-IQAIELEDLLR-NHLVEIPPNLPSSLVELR-VPAGLPDLK-VVQCSDLGLK	10	10	10	>sp|P28653|PGS1_MOUSE Biglycan OS=Mus musculus GN=Bgn PE=2 SV=1	1	10	10	10	32	32	32	41.639	369	320.31	25.2	22.5	27.1	13.8	19.5	16.8	27.1	26	20.1	11.1	19.8	15.7	18.7	17.9	26.3	30.1	21.4	24.1	13.8	30.1	19.8	22.5	23.6	27.9		77		P28653	129948	12111	Bgn	P28653
418	Bile salt-activated lipase OS=Mus musculus GN=Cel PE=1 SV=1	Bile salt-activated lipase OS=Mus musculus GN=Cel PE=1 SV=1	AISQSGMALSPWAIQK-ALTLAYK-AMIAYWTNFAR-GIPFATAK-GNVIVVTFNYR-LGAVYTEGGFVEGVNK-LGAVYTEGGFVEGVNKK-LSLLGGDSVDIFK-NYLYDGEEIATR-QTVTEEDFYR-SGDPNMGNSPVPTHWYPYTLENGNYLDITK-TVVAFETDVLFLIPTEIALAQHK-TYSYLFSHPSR-VGPLGFLSTGDANLPGNFGLR	14	14	14	>sp|Q64285|CEL_MOUSE Bile salt-activated lipase OS=Mus musculus GN=Cel PE=1 SV=1	1	14	14	14	31.7	31.7	31.7	65.812	599	164.15	3.3	7.2	14	0	5.7	25.4	29	18.4	0	22.7	3.5	0	1.8	15	25	7.7	0	0	5.7	0	8.7	12	21	27.2			242;484	Q64285	2494397	12613	Cel	Q64285
419	Biliverdin reductase A OS=Mus musculus GN=Blvra PE=2 SV=1	Biliverdin reductase A OS=Mus musculus GN=Blvra PE=2 SV=1	DLKDPHSSAFLNLIGYVSR-DPHSSAFLNLIGYVSR-DQDIFIQK-ELGSLDNVR-FGFPAFSGISR-FGVVVVGVGR-FTASPLEEEK-FTASPLEEEKFGFPAFSGISR-ILHCLELASDIQR-LLGQVSAEDLAAEK-MTVQLETQNK-NIFLKDQDIFIQK-QFLQAGK-QISLEDALR-SGSLEEVPNVGVNK-SPLSWIEEK-SQEVDVAYICTESSSHEDYIR	17	17	17	>sp|Q9CY64|BIEA_MOUSE Biliverdin reductase A OS=Mus musculus GN=Blvra PE=2 SV=1	1	17	17	17	57.3	57.3	57.3	33.524	295	230.11	44.4	42.4	42.4	42.4	40	40.3	40.3	40	42.4	46.8	43.4	42.4	33.6	26.4	31.9	39.3	35.9	36.9	31.9	42.4	38	39.3	41.4	32.5		73;280	200	Q9CY64	48428149	109778	Blvra	Q9CY64
420	Bis(5'-nucleosyl)-tetraphosphatase [asymmetrical] OS=Mus musculus GN=Nudt2 PE=1 SV=3	Bis(5'-nucleosyl)-tetraphosphatase [asymmetrical] OS=Mus musculus GN=Nudt2 PE=1 SV=3	ACGLIIFR-DYNVEIR-ELNYVAR-GHVDPGENDLETALR	4	4	4	>sp|P56380|AP4A_MOUSE Bis(5-nucleosyl)-tetraphosphatase [asymmetrical] OS=Mus musculus GN=Nudt2 PE=1 SV=3	1	4	4	4	25.2	25.2	25.2	16.989	147	6.0958	20.4	10.2	10.2	10.2	0	15.6	10.2	4.8	25.2	10.2	0	15	0	0	10.2	10.2	0	15.6	10.2	15	15	0	10.2	10.2		6		P56380	67476788	66401	Nudt2	P56380
421	Bisphosphoglycerate mutase OS=Mus musculus GN=Bpgm PE=2 SV=2	Bisphosphoglycerate mutase OS=Mus musculus GN=Bpgm PE=2 SV=2	AVGPHQFLGNQEAIQAAIK-AVGPHQFLGNQEAIQAAIKK-FCSWVDQK-HYGALIGLNR-IAPEILK-LNNDGLEEAR-MALNHGEEQVR-SESLKDVLER-SILISAHGNSSR-SYNVTPPPIEESHPYFHEIYSDR-SYNVTPPPIEESHPYFHEIYSDRR-VCDVPLDQLPR-YKVCDVPLDQLPR	13	13	13	>sp|P15327|PMGE_MOUSE Bisphosphoglycerate mutase OS=Mus musculus GN=Bpgm PE=2 SV=2	1	13	13	13	48.3	48.3	48.3	29.978	259	209.46	28.2	22.8	27.4	37.5	22.8	36.3	3.9	31.3	41.7	27.8	28.6	22.4	25.1	28.6	31.7	19.3	25.9	39.8	26.6	37.8	28.2	39	22	18.5		23;145		P15327	130351	12183	Bpgm	P15327
422	Bleomycin hydrolase OS=Mus musculus GN=Blmh PE=1 SV=1	Bleomycin hydrolase OS=Mus musculus GN=Blmh PE=1 SV=1	CYFFLNAFVDTAQK-IGPITPLQFYK-KTLYNNQPIDFLK-TLYNNQPIDFLK-TLYNNQPIDFLKK	5	5	5	>sp|Q8R016|BLMH_MOUSE Bleomycin hydrolase OS=Mus musculus GN=Blmh PE=1 SV=1	1	5	5	5	8.6	8.6	8.6	52.511	455	26.396	8.4	2.9	3.1	6.2	6.2	2.9	2.9	6.2	3.1	2.9	2.9	6.2	2.9	0	6.2	2.9	0	3.1	3.1	6.2	5.9	2.9	5.9	5.9		111		Q8R016	68565063	104184	Blmh	Q8R016
423	B-lymphocyte antigen CD20 OS=Mus musculus GN=Ms4a1 PE=1 SV=1	B-lymphocyte antigen CD20 OS=Mus musculus GN=Ms4a1 PE=1 SV=1	LVTAGIVENEWK-MKEEIIELSGVSSQPK-SNVVLLSAGEK-SNVVLLSAGEKNEQTIK	4	4	4	>sp|P19437|CD20_MOUSE B-lymphocyte antigen CD20 OS=Mus musculus GN=Ms4a1 PE=1 SV=1	1	4	4	4	15.5	15.5	15.5	31.958	291	24.915	15.5	10	15.5	10	11.3	10	10	15.5	10	7.9	15.5	15.5	15.5	7.9	5.8	0	10	10	0	4.1	10	3.8	15.5	5.8				P19437	115969	12482	Ms4a1	P19437
424	BolA-like protein 1 OS=Mus musculus GN=Bola1 PE=1 SV=1	BolA-like protein 1 OS=Mus musculus GN=Bola1 PE=1 SV=1	AKLEQALSPEVLELR-LEQALSPEVLELR-LVHEALSEELAGPVHALAIQAK-NESGGHAVPAGSETHFR	4	4	4	>sp|Q9D8S9|BOLA1_MOUSE BolA-like protein 1 OS=Mus musculus GN=Bola1 PE=1 SV=1	1	4	4	4	39.4	39.4	39.4	14.379	137	7.666	39.4	25.5	10.9	28.5	27	10.9	10.9	27	23.4	27	39.4	16.1	10.9	10.9	23.4	23.4	23.4	10.9	39.4	39.4	27	10.9	39.4	25.5				Q9D8S9	59797965	69168	Bola1	Q9D8S9
425	Bone marrow proteoglycan OS=Mus musculus GN=Prg2 PE=1 SV=1	Bone marrow proteoglycan OS=Mus musculus GN=Prg2 PE=1 SV=1	CVTLCTQGGHWR-GINQGQVWIGGR-GTLASIHSFSVNFGIQSAVR-RPFICSY	4	4	4	>sp|Q61878|PRG2_MOUSE Bone marrow proteoglycan OS=Mus musculus GN=Prg2 PE=1 SV=1	1	4	4	4	22.9	22.9	22.9	24.255	223	74.342	5.4	5.4	5.4	14.3	14.3	5.4	5.4	9	5.4	5.4	5.4	5.4	5.4	5.4	5.4	14.3	8.5	10.8	14.3	19.7	5.4	5.4	5.4	5.4		198;202;221		Q61878	3913581	19074	Prg2	Q61878
426	Bone marrow stromal antigen 2 OS=Mus musculus GN=Bst2 PE=1 SV=1	Bone marrow stromal antigen 2 OS=Mus musculus GN=Bst2 PE=1 SV=1	LNQELENLR-VSQALEQQAR	2	2	2	>sp|Q8R2Q8|BST2_MOUSE Bone marrow stromal antigen 2 OS=Mus musculus GN=Bst2 PE=1 SV=1	1	2	2	2	11	11	11	19.152	172	5.2519	11	11	11	11	5.2	0	11	0	0	11	11	11	5.8	0	5.2	5.2	0	5.2	11	11	0	0	11	11				Q8R2Q8	81878984	69550	Bst2	Q8R2Q8
427	BPI fold-containing family A member 2 OS=Mus musculus GN=Bpifa2 PE=2 SV=1	BPI fold-containing family A member 2 OS=Mus musculus GN=Bpifa2 PE=2 SV=1	NSILETLNTADLGNLK-SFTSLNGLLLK	2	2	2	>sp|P07743|BPIA2_MOUSE BPI fold-containing family A member 2 OS=Mus musculus GN=Bpifa2 PE=2 SV=1	1	2	2	2	11.5	11.5	11.5	24.753	235	2.7956	0	0	6.8	0	11.5	0	0	0	0	0	0	0	0	6.8	0	0	0	0	0	0	0	11.5	0	0				P07743	131434	19194	Bpifa2	P07743
429	Brain acid soluble protein 1 OS=Mus musculus GN=Basp1 PE=1 SV=3	Brain acid soluble protein 1 OS=Mus musculus GN=Basp1 PE=1 SV=3	AGEASAESTGAADGAAPEEGEAK-APAPAAPAAAEPQAEAPAAAASSEQSVAVKE-ETPAASEAPSSAAK-SDAAPAASDSKPSSAEPAPSSK	4	4	4	>sp|Q91XV3|BASP1_MOUSE Brain acid soluble protein 1 OS=Mus musculus GN=Basp1 PE=1 SV=3	1	4	4	4	39.8	39.8	39.8	22.086	226	30.805	39.8	39.8	29.6	29.6	39.8	39.8	19.9	30.1	29.6	39.8	0	39.8	6.2	13.7	29.6	19.9	23.9	39.8	29.6	39.8	39.8	23.9	39.8	39.8				Q91XV3	66773932	70350	Basp1	Q91XV3
430	Branched-chain-amino-acid aminotransferase, mitochondrial OS=Mus musculus GN=Bcat2 PE=2 SV=2	Branched-chain-amino-acid aminotransferase, mitochondrial OS=Mus musculus GN=Bcat2 PE=2 SV=2	AWIGGVGDCK-KPAPSQALLFGK-LCLPDFDKQELLECIR-LGGNYGPTVAVQR-QLHIPTMENGPELILR-QSLLDLAR	6	6	6	>sp|O35855|BCAT2_MOUSE Branched-chain-amino-acid aminotransferase, mitochondrial OS=Mus musculus GN=Bcat2 PE=2 SV=2	1	6	6	6	19.1	19.1	19.1	44.127	393	60.135	9.4	19.1	13.5	12.5	7.9	15	10.9	19.1	12.5	13.5	7.9	12	8.4	6.1	15	5.3	7.4	5.3	16.5	19.1	2	9.4	10.9	12.5		136;148;229	363	O35855	51338740	12036	Bcat2	O35855
432	BRCA2 and CDKN1A-interacting protein OS=Mus musculus GN=Bccip PE=2 SV=1	BRCA2 and CDKN1A-interacting protein OS=Mus musculus GN=Bccip PE=2 SV=1	FSYSVQGESDTR-LLQQLFLK	2	2	2	>sp|Q9CWI3|BCCIP_MOUSE BRCA2 and CDKN1A-interacting protein OS=Mus musculus GN=Bccip PE=2 SV=1	1	2	2	2	6.3	6.3	6.3	35.942	316	3.3642	2.5	0	0	0	0	0	0	0	0	0	0	0	0	0	0	0	0	0	0	3.8	0	0	0	0				Q9CWI3	81880938	66165	Bccip	Q9CWI3
433	Bridging integrator 2 OS=Mus musculus GN=Bin2 PE=1 SV=1; Amphiphysin OS=Mus musculus GN=Amph PE=1 SV=1	Bridging integrator 2 OS=Mus musculus GN=Bin2 PE=1 SV=1	AGGAAGLFAK-AIVGNNDLLWEDYEEK-AIVGNNDLLWEDYEEKLADQALR-AQIVFEDLNQELLEELPILYNSR-ASPDASSNPEPAETR-DTPSPGDVVLR-FEQSASNFYQQQAEGHK-GQTGKDTPSPGDVVLR-IGCYVTVFQNISNLR-LADQALR-LNHNLYEVMSK-NFLSAVK-TMENYVSQFSEIK-TSAPPSRPPPPR-VSETLQEVYSSDWDGHEDLK-LVDYDSAR	16;1	16;1	15;0	>sp|D3Z6Q9|BIN2_MOUSE Bridging integrator 2 OS=Mus musculus GN=Bin2 PE=1 SV=1	2	16	16	15	38.9	38.9	37.2	52.553	489	173.12	28.4	20.9	21.3	20.4	23.3	30.7	28	29.9	24.3	24.3	16	19.6	19.6	17.6	23.3	17.8	23.1	16	23.1	29.9	19.6	27	30.7	25.8		205		D3Z6Q9	380876863	---	Bin2	D3Z6Q9
434	BRISC and BRCA1-A complex member 1 OS=Mus musculus GN=Babam1 PE=2 SV=1	BRISC and BRCA1-A complex member 1 OS=Mus musculus GN=Babam1 PE=2 SV=1	ALGAQASVGSR-SEGEGEAATADGGAASVPGAGPKPWQVPASASEVQIR-TELPVTENVQTIPPPYVVR	3	3	3	>sp|Q3UI43|BABA1_MOUSE BRISC and BRCA1-A complex member 1 OS=Mus musculus GN=Babam1 PE=2 SV=1	1	3	3	3	20.1	20.1	20.1	36.793	333	5.0488	5.7	16.8	16.8	5.7	9	0	16.8	9	16.8	9	3.3	16.8	20.1	0	0	16.8	0	11.1	20.1	14.4	3.3	5.7	16.8	0				Q3UI43	123788020	68251	Babam1	Q3UI43
435	BRO1 domain-containing protein BROX OS=Mus musculus GN=Brox PE=2 SV=1	BRO1 domain-containing protein BROX OS=Mus musculus GN=Brox PE=2 SV=1	HAPGLIAALAYDTASFYQK-IPTEAPQLELK-NAADLYFSLLQGFINSVGDSTQESK	3	3	3	>sp|Q8K2Q7|BROX_MOUSE BRO1 domain-containing protein BROX OS=Mus musculus GN=Brox PE=2 SV=1	1	3	3	3	13.4	13.4	13.4	46.201	411	7.072	7.3	0	0	0	2.7	0	0	4.6	4.6	2.7	2.7	2.7	0	0	0	6.1	0	0	0	6.1	0	2.7	0	2.7				Q8K2Q7	81901022	71678	Brox	Q8K2Q7
436	BTB/POZ domain-containing protein KCTD12 OS=Mus musculus GN=Kctd12 PE=1 SV=1; BTB/POZ domain-containing protein KCTD8 OS=Mus musculus GN=Kctd8 PE=1 SV=1	BTB/POZ domain-containing protein KCTD12 OS=Mus musculus GN=Kctd12 PE=1 SV=1	CTVVSVPDSLLWR-DLQLVLPDYFPER-EAEYFELPELVR-EGSLGDELLPLGYAEPEPQEGASAGAPSPTLELASR-EVFGDTLNESRDPDRPPER-FNFLEQAFDK-LGAPQQPGPGPPPPHSR-MFTQQQPQELAR-RLGAPQQPGPGPPPPHSR-SGYITIGYR-SPSGGAAGPLLTPSQSLDGSR-SPSGGAAGPLLTPSQSLDGSRR-YILDYLR-EVFGDTLNESR	14;1	14;1	13;1	>sp|Q6WVG3|KCD12_MOUSE BTB/POZ domain-containing protein KCTD12 OS=Mus musculus GN=Kctd12 PE=1 SV=1	2	14	14	13	52.3	52.3	50.2	35.892	327	238.88	52	45.9	40.7	38.2	49.2	49.2	48.3	52	49.8	42.2	52	52	45.9	30.6	52	48.3	7.6	41.9	37	52	31.2	48	52	31.2		50	63	Q6WVG3	50400892	239217	Kctd12	Q6WVG3
437	BUB3-interacting and GLEBS motif-containing protein ZNF207 OS=Mus musculus GN=Znf207 PE=2 SV=1	BUB3-interacting and GLEBS motif-containing protein ZNF207 OS=Mus musculus GN=Znf207 PE=2 SV=1	ETIDAVPNAIPGR-LIHPDEDISLEER	2	2	2	>sp|Q9JMD0|ZN207_MOUSE BUB3-interacting and GLEBS motif-containing protein ZNF207 OS=Mus musculus GN=Znf207 PE=2 SV=1	1	2	2	2	5.3	5.3	5.3	52.792	495	7.5827	2.6	2.6	2.6	2.6	2.6	2.6	2.6	2.6	2.6	2.6	2.6	2.6	2.6	0	0	2.6	2.6	0	0	5.3	0	2.6	2.6	2.6				Q9JMD0	81917608	22680	---	Q9JMD0
438	Bystin OS=Mus musculus GN=Bysl PE=1 SV=3	Bystin OS=Mus musculus GN=Bysl PE=1 SV=3	EALLELLR-FYNLVLLPR	2	2	2	>sp|O54825|BYST_MOUSE Bystin OS=Mus musculus GN=Bysl PE=1 SV=3	1	2	2	2	3.9	3.9	3.9	49.783	436	2.6123	0	3.9	3.9	2.1	2.1	1.8	2.1	2.1	1.8	2.1	0	3.9	0	0	3.9	1.8	0	0	1.8	1.8	2.1	0	1.8	0				O54825	109940029	53414	Bysl	O54825
439	C-1-tetrahydrofolate synthase, cytoplasmic OS=Mus musculus GN=Mthfd1 PE=1 SV=4	C-1-tetrahydrofolate synthase, cytoplasmic OS=Mus musculus GN=Mthfd1 PE=1 SV=4	AAEEIGIK-APAGILNGK-ASQAPSSFQLLYDLK-AYTEEDLDLVEK-EAGVQIAGR-EIGLLTEEVELYGETK-FSDIQIR-GVPTGFVLPIR-IFHELTQTDK-ITIGQSPTEK-IYGADDIELLPEAQNK-IYGADDIELLPEAQNKAEIYTK-LDIDPETITWQR-LIGNLAR-LVPSVNGIR-LVSAQIR-MFGVPVVVAVNVFK-MHGGGPTVTAGLPLPK-QNVFACVR-QPSQGPTFGIK-STTTIGLVQALGAHLR-TDPTTLTDDEINR-TDTDAELDLVSR-TPVPSDIAISR-TSTESEVLK-VLLSALDR-WTIQYNK-YSGLQPHVVVLVATVR-YVVVTGITPTPLGEGK	29	29	29	>sp|Q922D8|C1TC_MOUSE C-1-tetrahydrofolate synthase, cytoplasmic OS=Mus musculus GN=Mthfd1 PE=1 SV=4	1	29	29	29	34.3	34.3	34.3	101.2	935	150.55	21.2	25.2	18	20.4	19.8	31	24.6	28.7	19.4	23	16.9	16.3	20.1	11.2	19.9	26	26.7	13.8	16.4	19.7	17	18.4	25	21		408	706;747	Q922D8	341940636	108156	Mthfd1	Q922D8
440	CAD protein OS=Mus musculus GN=Cad PE=2 SV=1; Carbamoyl-phosphate synthase [ammonia], mitochondrial OS=Mus musculus GN=Cps1 PE=1 SV=2	CAD protein OS=Mus musculus GN=Cad PE=2 SV=1	AAFALGGLGSGFASTK-AIVHAVGQELQVTGPFNLQLIAK-APHVLVLGSGVYR-AQILVLTYPLIGNYGIPSDEEDEFGLSK-ATGYPLAYVAAK-EELSALVAPAFAHTSQVLIDK-ELSDLESAR-FLSSAAAVSK-GHNQPCLLVGTGR-GTEPSALPFVDPNARPLAPEVSIK-LALGIPLPELR-LFVEALGQIGPAPPLK-LGYPVLVR-LLDTIGISQPQWR-LSLDDLLQR-LYLNETFSELR-MALLATVLGR-NILLTIGSYK-QIALAVLSTELAVR-SFEEAFQK-TLGVDLVALATR-VLGTPVETIELTEDRR-VLGTSPEAIDSAENR-VPQFSFSR-YVAPPSLR-EIEYEVVR	26;1	26;1	26;1	>sp|B2RQC6|PYR1_MOUSE CAD protein OS=Mus musculus GN=Cad PE=2 SV=1	2	26	26	26	15.6	15.6	15.6	243.24	2225	71.318	4.1	7.2	10	8.4	8.5	7.8	10.1	8.9	6.6	9.8	10.4	5.3	5.8	0.8	6.7	9.7	9	7.2	3.6	10.5	6.6	7.8	11.6	9.8				B2RQC6	597501018	69719	Cad	B2RQC6
441	Calcineurin B homologous protein 1 OS=Mus musculus GN=Chp1 PE=1 SV=2	Calcineurin B homologous protein 1 OS=Mus musculus GN=Chp1 PE=1 SV=2	DELLQVLR-IINAFFSEGEDQVNFR-IPELAINPLGDR-TIQEADQDGDSAISFTEFVK	4	4	4	>sp|P61022|CHP1_MOUSE Calcineurin B homologous protein 1 OS=Mus musculus GN=Chp1 PE=1 SV=2	1	4	4	4	28.7	28.7	28.7	22.432	195	7.7627	10.3	6.2	10.3	6.2	0	10.3	0	6.2	24.6	6.2	0	10.3	6.2	6.2	6.2	10.3	0	0	6.2	12.3	6.2	6.2	10.3	0				P61022	46577578	56398	Chp1	P61022
442	Calcium homeostasis endoplasmic reticulum protein OS=Mus musculus GN=Cherp PE=1 SV=1	Calcium homeostasis endoplasmic reticulum protein OS=Mus musculus GN=Cherp PE=1 SV=1	ELLAALQK-EQGIQDPIKGGDVR-LLQLWEK	3	3	3	>sp|Q8CGZ0|CHERP_MOUSE Calcium homeostasis endoplasmic reticulum protein OS=Mus musculus GN=Cherp PE=1 SV=1	1	3	3	3	3.1	3.1	3.1	106.17	936	3.0178	1.6	1.5	0	0.7	0.7	0.7	0	0.7	2.2	3.1	3.1	1.5	2.4	0	0	0.7	2.2	0	2.2	0	2.2	1.6	2.2	0.7				Q8CGZ0	81871252	27967	Cherp	Q8CGZ0
443	Calcium/calmodulin-dependent protein kinase type 1 OS=Mus musculus GN=Camk1 PE=1 SV=1; Calcium/calmodulin-dependent protein kinase type 1D OS=Mus musculus GN=Camk1d PE=1 SV=2	Calcium/calmodulin-dependent protein kinase type 1 OS=Mus musculus GN=Camk1 PE=1 SV=1	DLKPENLLYYSLDEDSK-DVLGTGAFSEVILAEDKR-LIFQVLDAVK-LFEQILK-QAFNATAVVR	5;2	5;2	5;2	>sp|Q91YS8|KCC1A_MOUSE Calcium/calmodulin-dependent protein kinase type 1 OS=Mus musculus GN=Camk1 PE=1 SV=1	2	5	5	5	16.6	16.6	16.6	41.624	374	5.6939	6.4	9.1	9.9	11.8	1.9	6.4	9.1	9.9	9.9	1.9	6.7	9.1	1.9	6.4	7.2	9.1	0	0	4.5	7.2	1.9	6.4	1.9	1.9				Q91YS8	27734410	52163	Camk1	Q91YS8
444	Calcium/calmodulin-dependent protein kinase type II subunit delta OS=Mus musculus GN=Camk2d PE=1 SV=1; Calcium/calmodulin-dependent protein kinase type II subunit alpha OS=Mus musculus GN=Camk2a PE=1 SV=2; Calcium/calmodulin-dependent protein kinase type II subunit gamma OS=Mus musculus GN=Camk2g PE=1 SV=1; Calcium/calmodulin-dependent protein kinase type II subunit beta OS=Mus musculus GN=Camk2b…	Calcium/calmodulin-dependent protein kinase type II subunit delta OS=Mus musculus GN=Camk2d PE=1 SV=1	ESTESSNTTIEDEDVK-FTDEYQLFEELGK-FYFENALSK-IPTGQEYAAK-VTEQLIEAINNGDFEAYTK-AGAYDFPSPEWDTVTPEAK-DLKPENLLLASK-GAFSVVR	8;3;3;3	8;3;3;3	8;3;3;3	>sp|Q6PHZ2|KCC2D_MOUSE Calcium/calmodulin-dependent protein kinase type II subunit delta OS=Mus musculus GN=Camk2d PE=1 SV=1	4	8	8	8	21	21	21	56.369	499	27.343	12.6	14.4	11.4	10.8	10.2	12	17.8	15.8	15.4	8.8	18.4	15.4	4.4	4.2	12.6	11.4	2.4	5.6	14.6	15.8	10	17.8	15.8	9.4				Q6PHZ2	81911483	108058	Camk2d	Q6PHZ2
445	Calcium-binding mitochondrial carrier protein Aralar1 OS=Mus musculus GN=Slc25a12 PE=1 SV=1	Calcium-binding mitochondrial carrier protein Aralar1 OS=Mus musculus GN=Slc25a12 PE=1 SV=1	DIEVTKEEFAQSAIR-FGLYLPK-FTLGSVAGAVGATAVYPIDLVK-IAPLAEGALPYNLAELQR-IVQLLAGVADQTK-LLLADENGR-LTLADIER-QQSPGLGRPIWLQIAESAYR-SGNGEVTFENVK-SPSVAVAQPK-VGGINLLTAGALAGVPAASLVTPADVIK-VSALNVLQDLGLFGLYK-WFYIDFGGLKPSGSEPTPK-YGQVTPLEIDILYQLADLYNASGR-YLGLYNDPNSNPK-LQVAGEITTGPR-LTVNDFVR-YEGFFGLYR	18	18	15	>sp|Q8BH59|CMC1_MOUSE Calcium-binding mitochondrial carrier protein Aralar1 OS=Mus musculus GN=Slc25a12 PE=1 SV=1	1	18	18	15	39	39	34.7	74.569	677	171.32	30.1	15.7	14	23.3	24.4	27	28.7	25.4	27	22.5	11.8	26.1	24.5	14	17.6	33.5	28.4	22.5	26.7	26.7	19.9	26	31.2	32.9				Q8BH59	47605479	78830	Slc25a12	Q8BH59
446	Calcium-binding mitochondrial carrier protein Aralar2 OS=Mus musculus GN=Slc25a13 PE=1 SV=1	Calcium-binding mitochondrial carrier protein Aralar2 OS=Mus musculus GN=Slc25a13 PE=1 SV=1	GLLPQLLGVAPEK	4	1	1	>sp|Q9QXX4|CMC2_MOUSE Calcium-binding mitochondrial carrier protein Aralar2 OS=Mus musculus GN=Slc25a13 PE=1 SV=1	1	4	1	1	6.2	1.9	1.9	74.466	676	7.6623	5	6.2	4.4	4.9	6.2	6.2	3.1	6.2	6.2	4.9	4.3	5	4.9	3.3	3.3	6.2	5	6.2	4.9	5	3.3	4.9	4.9	6.2				Q9QXX4	13124085	50799	Slc25a13	Q9QXX4
447	Calcium-binding mitochondrial carrier protein SCaMC-1 OS=Mus musculus GN=Slc25a24 PE=1 SV=1	Calcium-binding mitochondrial carrier protein SCaMC-1 OS=Mus musculus GN=Slc25a24 PE=1 SV=1	DYFLFNPVTDIEEIIR-QLLAGGVAGAVSR-SYWLDNFAK	3	3	3	>sp|Q8BMD8|SCMC1_MOUSE Calcium-binding mitochondrial carrier protein SCaMC-1 OS=Mus musculus GN=Slc25a24 PE=1 SV=1	1	3	3	3	8	8	8	52.901	475	7.5926	0	4.6	4.6	4.6	2.7	4.6	4.6	2.7	2.7	0	3.4	4.6	2.7	2.7	4.6	8	0	8	2.7	6.1	0	1.9	8	2.7				Q8BMD8	81913394	229731	Slc25a24	Q8BMD8
448	Calcium-binding protein 39 OS=Mus musculus GN=Cab39 PE=1 SV=2	Calcium-binding protein 39 OS=Mus musculus GN=Cab39 PE=1 SV=2	DVAQIFNNILR-IILWSEQFYDFFR-LIEFLSK-LLGELLLDR-LLSAEFLEQHYDR-NIQFEAFHVFK-TQPILDILLK-VFVANPNK	8	8	8	>sp|Q06138|CAB39_MOUSE Calcium-binding protein 39 OS=Mus musculus GN=Cab39 PE=1 SV=2	1	8	8	8	24	24	24	39.842	341	20.988	20.2	17.3	16.4	13.2	20.2	13.5	10.3	15.2	8.5	15.2	22	16.4	15	15	14.1	12	3.2	7	9.7	20.2	5.3	15	16.4	5.3				Q06138	341940297	12283	Cab39	Q06138
449	Calcium-binding protein 39-like OS=Mus musculus GN=Cab39l PE=2 SV=3	Calcium-binding protein 39-like OS=Mus musculus GN=Cab39l PE=2 SV=3	DVTQIFNNILR-GYEAPQIALR-IILFSNQFR-TQPIVEILLK	4	4	4	>sp|Q9DB16|CB39L_MOUSE Calcium-binding protein 39-like OS=Mus musculus GN=Cab39l PE=2 SV=3	1	4	4	4	11.9	11.9	11.9	39.105	337	4.2587	0	6.2	6.2	5.9	0	0	9.2	5.9	5.9	3	3	6.2	3	3	8.9	0	0	0	9.2	5.9	3	3	0	0				Q9DB16	51338820	69008	Cab39l	Q9DB16
450	Calcium-regulated heat stable protein 1 OS=Mus musculus GN=Carhsp1 PE=1 SV=1	Calcium-regulated heat stable protein 1 OS=Mus musculus GN=Carhsp1 PE=1 SV=1	GHGFITPADGGPDIFLHISDVEGEYVPVEGDEVTYK-GNVVPSPLPTR-LQAVEVVITHLAPGTK	3	3	3	>sp|Q9CR86|CHSP1_MOUSE Calcium-regulated heat stable protein 1 OS=Mus musculus GN=Carhsp1 PE=1 SV=1	1	3	3	3	42.6	42.6	42.6	16.062	148	20.306	18.2	18.2	7.4	7.4	0	10.8	18.2	7.4	10.8	18.2	18.2	7.4	18.2	0	7.4	35.1	18.2	0	18.2	42.6	18.2	10.8	18.2	7.4				Q9CR86	41016923	52502	Carhsp1	Q9CR86
451	Calcyclin-binding protein OS=Mus musculus GN=Cacybp PE=1 SV=1	Calcyclin-binding protein OS=Mus musculus GN=Cacybp PE=1 SV=1	EKPSYDTEADPSEGLMNVLK-ISNYGWDQSDKFVK-KPELDNEKPAAVVAPLTTGYTVK-NYSMIVNNLLKPISVESSSK-SFDLLVK-WDYLTQVEK	6	6	6	>sp|Q9CXW3|CYBP_MOUSE Calcyclin-binding protein OS=Mus musculus GN=Cacybp PE=1 SV=1	1	6	6	6	40.6	40.6	40.6	26.51	229	107.3	31.9	3.1	13.1	31.9	25.8	31.9	0	17	25.8	27.9	40.6	17	25.8	13.1	25.8	17	23.1	31.9	17	31.9	23.1	27.9	31.9	31.9			128	Q9CXW3	46576641	12301	Cacybp	Q9CXW3
452	Calmodulin OS=Mus musculus GN=Calm1 PE=1 SV=2; Calmodulin-like protein 3 OS=Mus musculus GN=Calml3 PE=2 SV=1; Troponin C, skeletal muscle OS=Mus musculus GN=Tnnc2 PE=1 SV=2	Calmodulin OS=Mus musculus GN=Calm1 PE=1 SV=2	EAFSLFDKDGDGTITTK-VFDKDGNGYISAAELR-DTDSEEEIR-DTDSEEEIREAFR-ELGTVMR	5;2;1	5;2;1	5;2;1	>sp|P62204|CALM_MOUSE Calmodulin OS=Mus musculus GN=Calm1 PE=1 SV=2	3	5	5	5	35.6	35.6	35.6	16.837	149	95.261	30.9	10.7	30.9	24.2	30.9	30.9	19.5	24.8	35.6	22.1	22.1	30.9	22.1	22.1	24.2	30.9	30.9	19.5	30.9	22.1	16.8	11.4	28.2	30.9			37	P62204	49037483	12313	Calm3	P62204
453	Calnexin OS=Mus musculus GN=Canx PE=1 SV=1	Calnexin OS=Mus musculus GN=Canx PE=1 SV=1	AEEDEILNR-APVPTGEVYFADSFDR-EIEDPEDR-GSLSGWILSK-IPNPDFFEDLEPFK-KIPNPDFFEDLEPFK-QKSDAEEDGVTGSQDEEDSKPK-TAELSLDQFHDK-VTYKAPVPTGEVYFADSFDR-VVDDWANDGWGLK-VVDDWANDGWGLKK	11	11	11	>sp|P35564|CALX_MOUSE Calnexin OS=Mus musculus GN=Canx PE=1 SV=1	1	11	11	11	18.6	18.6	18.6	67.277	591	85.994	15.1	11.3	9.3	10.7	8.3	8.3	14.2	14.4	7.4	6.9	8.5	10.8	6.8	9.3	11.3	12.2	13.5	14.2	9.8	9.6	14.2	6.8	10.8	16.4				P35564	543921	12330	Canx	P35564
454	Calpain small subunit 1 OS=Mus musculus GN=Capns1 PE=2 SV=1; Calpain small subunit 2 OS=Mus musculus GN=Capns2 PE=2 SV=1	Calpain small subunit 1 OS=Mus musculus GN=Capns1 PE=2 SV=1	ILGGVISAISEAAAQYNPEPPPPR-SHYSNIEANESEEVR-TDGFGIDTCR-YADESGNMDFDNFISCLVR-LGFEEFK-YLWNNIK	6;2	6;2	6;2	>sp|O88456|CPNS1_MOUSE Calpain small subunit 1 OS=Mus musculus GN=Capns1 PE=2 SV=1	2	6	6	6	30.5	30.5	30.5	28.463	269	141.41	20.8	10.8	30.5	20.8	27.9	30.5	0	30.5	27.9	30.5	17.1	26.8	11.9	23.4	10.8	19.7	30.5	30.5	17.8	30.5	24.2	20.8	23.4	30.5		145;233	225	O88456	18202239	12336	Capns1	O88456
455	Calpain-1 catalytic subunit OS=Mus musculus GN=Capn1 PE=1 SV=1	Calpain-1 catalytic subunit OS=Mus musculus GN=Capn1 PE=1 SV=1	APSDLYQIILK-AQSEHFINLR-DFFLANASR-DLEAITFK-ELQTILNR-GSLLGCSINISDIR-KAGTQELDDQIQANLPDEK-LEICNLTPDALK-LLDTDLDGVVTFDLFK-LPPGEYIVVPSTFEPNKEGDFLLR-LVFVHSAQGNEFWSALLEK-NWNTTFYEGTWR-NYLTIFR-NYPATFWVNPQFK-VLSEEEIDDNFK	15	15	15	>sp|O35350|CAN1_MOUSE Calpain-1 catalytic subunit OS=Mus musculus GN=Capn1 PE=1 SV=1	1	15	15	15	27.2	27.2	27.2	82.105	713	46.549	15.4	8.7	14.7	15.3	10.9	20.2	11.1	10.2	14.3	18.4	7.9	11.5	12.6	11.1	9.8	12.2	19.5	9	16.5	13.3	6.7	12.2	15.3	18		250;351		O35350	12643550	12333	Capn1	O35350
456	Calpain-2 catalytic subunit OS=Mus musculus GN=Capn2 PE=2 SV=4	Calpain-2 catalytic subunit OS=Mus musculus GN=Capn2 PE=2 SV=4	DGELLFVHSAEGSEFWSALLEK-EFYILWTK-FADDELIIDFDNFVR-LEEEDEDEEDGER-LEICNLTPDTLTCDSYKK-NFFLTTR-NPWGQVEWTGK-RPTEICADPQFIIGGATR-SDTFINLR-YLNQDYETLR	10	10	10	>sp|O08529|CAN2_MOUSE Calpain-2 catalytic subunit OS=Mus musculus GN=Capn2 PE=2 SV=4	1	10	10	10	18.6	18.6	18.6	79.871	700	35.305	14.1	3.3	7	3.3	5.1	12.3	8.7	8.3	4.3	2.3	3.7	8.7	6.1	6.6	6.9	4.9	9	6.6	3.6	9	9.1	13	10.4	10		82;341;350		O08529	13959678	12334	Capn2	O08529
457	Calpastatin OS=Mus musculus GN=Cast PE=1 SV=2	Calpastatin OS=Mus musculus GN=Cast PE=1 SV=2	EQKPFTPASPVQSTPSKPSDK-ESQEQLAPLSDDFLLDALSQDFSSPANISSLEFEDAK-GVVPEDAVETLAGSLGTR-KSNDTSQTPPGETVPR-KVEEEVINDQALQALSDSLGTR-LSAAISEVVSQTPAPSTHAAAPLPGTEQK-SLSESELIGELSADFDR	7	7	7	>sp|P51125|ICAL_MOUSE Calpastatin OS=Mus musculus GN=Cast PE=1 SV=2	1	7	7	7	20.3	20.3	20.3	84.921	788	107.84	15.6	8.8	12.9	2.8	5.1	4.9	10.9	5.1	4.9	5.1	10.9	8.8	12.9	2.3	2.8	7.2	2.2	2.3	8.8	17.6	7.1	5.1	7.2	7.1				P51125	22261802	12380	Cast	P51125
458	Calponin-1 OS=Mus musculus GN=Cnn1 PE=2 SV=1	Calponin-1 OS=Mus musculus GN=Cnn1 PE=2 SV=1	EWIEGVTGR-FASQQGMTAYGTR-GMTVYGLPR-GPAYGLSAEVK-LGTDQPLDQATISLQMGTNK-VNESTQNWHQLENIGNFIK	6	6	6	>sp|Q08091|CNN1_MOUSE Calponin-1 OS=Mus musculus GN=Cnn1 PE=2 SV=1	1	6	6	6	27.3	27.3	27.3	33.355	297	33.334	19.9	13.1	13.1	17.5	10.4	21.2	14.1	13.1	27.3	10.1	16.2	13.1	6.7	3	0	10.8	3	0	13.1	27.3	10.1	6.4	3.7	10.4			179;208;258	Q08091	584951	12797	Cnn1	Q08091
459	Calponin-2 OS=Mus musculus GN=Cnn2 PE=1 SV=1	Calponin-2 OS=Mus musculus GN=Cnn2 PE=1 SV=1	CASQSGMTAYGTR-CASQVGMTAPGTR-GLQSGVDIGVK-LQPGSVPK-SMQNWHQLENLSNFIK-SWIEGLTGLSIGPDFQK-YDPQKEAELR-GPSYGLSAEVK	8	8	7	>sp|Q08093|CNN2_MOUSE Calponin-2 OS=Mus musculus GN=Cnn2 PE=1 SV=1	1	8	8	7	32.5	32.5	28.9	33.155	305	103.54	20.7	27.2	17.4	19.7	32.5	28.2	26.9	24.6	24.9	23	19.7	23	18.7	15.4	13.1	23.6	18.7	28.2	26.9	32.5	19.7	15.4	32.5	28.2		175;215	79;181;221	Q08093	584954	12798	Cnn2	Q08093
460	Calponin-3 OS=Mus musculus GN=Cnn3 PE=1 SV=1	Calponin-3 OS=Mus musculus GN=Cnn3 PE=1 SV=1	DGIILCELINK-GASQAGMLAPGTR-GMSVYGLGR-KVNESSLNWPQLENIGNFIK-LTLQPVDNSTISLQMGTNK-VNESSLNWPQLENIGNFIK	7	6	6	>sp|Q9DAW9|CNN3_MOUSE Calponin-3 OS=Mus musculus GN=Cnn3 PE=1 SV=1	1	7	6	6	25.2	21.8	21.8	36.428	330	28.98	3.3	7.3	3.3	15.2	3.3	13	10	13	12.7	9.1	21.5	9.1	3.3	9.1	3.3	14.8	3.3	7.3	7.3	9.1	3.3	13	7.3	7.3		59	219;247;258	Q9DAW9	55583981	71994	Cnn3	Q9DAW9
461	Calreticulin OS=Mus musculus GN=Calr PE=1 SV=1	Calreticulin OS=Mus musculus GN=Calr PE=1 SV=1	AKIDDPTDSKPEDWDKPEHIPDPDAK-CKDDEFTHLYTLIVRPDNTYEVK-DMHGDSEYNIMFGPDICGPGTK-EQFLDGDAWTNR-FEPFSNK-FEPFSNKGQTLVVQFTVK-FVLSSGK-FYALSAK-FYGDLEK-FYGDLEKDK-GQTLVVQFTVK-GTWIHPEIDNPEYSPDANIYAYDSFAVLGLDLWQVK-HEQNIDCGGGYVK-IDNSQVESGSLEDDWDFLPPK-IDNSQVESGSLEDDWDFLPPKK-IKDPDAAKPEDWDER-KPEDWDEEMDGEWEPPVIQNPEYK-KVHVIFNYK-LFPSGLDQK-QIDNPDYK-SGTIFDNFLITNDEAYAEEFGNETWGVTK	21	21	21	>sp|P14211|CALR_MOUSE Calreticulin OS=Mus musculus GN=Calr PE=1 SV=1	1	21	21	21	69.5	69.5	69.5	47.994	416	323.31	46.6	31.7	40.9	40.1	48.8	48.3	45	36.5	54.6	30.5	27.9	40.6	35.8	20.4	49.3	65.1	39.9	37.5	44	57	44.5	32.2	52.9	51.2		105;137;163	122;131;257	P14211	117502	12317	Calr	P14211
462	cAMP-dependent protein kinase catalytic subunit alpha OS=Mus musculus GN=Prkaca PE=1 SV=3	cAMP-dependent protein kinase catalytic subunit alpha OS=Mus musculus GN=Prkaca PE=1 SV=3	DLKPENLLIDQQGYIQVTDFGFAK-ILQAVNFPFLVK-KWETPSQNTAQLDQFDR-WETPSQNTAQLDQFDR-NLLQVDLTK-TLGTGSFGR-TWTLCGTPEYLAPEIILSK-WFATTDWIAIYQR	8	8	4	>sp|P05132|KAPCA_MOUSE cAMP-dependent protein kinase catalytic subunit alpha OS=Mus musculus GN=Prkaca PE=1 SV=3	1	8	8	4	29.3	29.3	15.1	40.57	351	37.838	13.4	13.1	8.5	13.4	20.2	10.5	13.1	6	10.8	13.1	20.2	13.4	10.5	10.8	10.5	16.5	0	12.8	13.1	23.1	8.5	13.1	17.4	2.6		200		P05132	125206	18747	Prkaca	P05132
463	cAMP-dependent protein kinase catalytic subunit beta OS=Mus musculus GN=Prkacb PE=1 SV=2	cAMP-dependent protein kinase catalytic subunit beta OS=Mus musculus GN=Prkacb PE=1 SV=2	DLKPENLLIDHQGYIQVTDFGFAK-ILQAVEFPFLVR-KWENPPPSNAGLEDFER	7	3	3	>sp|P68181|KAPCB_MOUSE cAMP-dependent protein kinase catalytic subunit beta OS=Mus musculus GN=Prkacb PE=1 SV=2	1	7	3	3	29.3	15.1	15.1	40.707	351	37.149	15.4	8.5	13.4	15.4	20.2	17.7	8.5	12.8	17.7	20.2	15.4	20.2	10.8	6	17.7	16.5	3.4	6	8.5	18.2	8.5	13.4	17.7	6		200		P68181	59799776	18749	Prkacb	P68181
464	cAMP-dependent protein kinase type I-alpha regulatory subunit OS=Mus musculus GN=Prkar1a PE=1 SV=3; cAMP-dependent protein kinase type I-beta regulatory subunit OS=Mus musculus GN=Prkar1b PE=2 SV=2	cAMP-dependent protein kinase type I-alpha regulatory subunit OS=Mus musculus GN=Prkar1a PE=1 SV=3	IVVQGEPGDEFFIILEGTAAVLQR-LTVADALEPVQFEDGQK-NIQQYNSFVSLSV-RSENEEFVEVGR-SENEEFVEVGR-TDSREDEISPPPPNPVVK-VSILESLDKWER-NVLFSHLDDNER	8;1	8;1	8;1	>sp|Q9DBC7|KAP0_MOUSE cAMP-dependent protein kinase type I-alpha regulatory subunit OS=Mus musculus GN=Prkar1a PE=1 SV=3	2	8	8	8	28.3	28.3	28.3	43.185	381	79.531	23.4	15.5	15.5	13.9	13.9	10.5	19.9	15.5	13.6	15.2	21.8	10.8	18.6	15.5	10.5	17.1	0	18.4	17.3	20.2	10.8	14.2	17.1	17.1				Q9DBC7	54036156	19084	Prkar1a	Q9DBC7
465	cAMP-dependent protein kinase type II-alpha regulatory subunit OS=Mus musculus GN=Prkar2a PE=1 SV=2	cAMP-dependent protein kinase type II-alpha regulatory subunit OS=Mus musculus GN=Prkar2a PE=1 SV=2	AATIIATSEGSLWGLDR-TDEHVIDQGDDGDNFYVIER	3	2	2	>sp|P12367|KAP2_MOUSE cAMP-dependent protein kinase type II-alpha regulatory subunit OS=Mus musculus GN=Prkar2a PE=1 SV=2	1	3	2	2	13	9.2	9.2	45.389	401	14.603	9.2	8.7	8.7	3.7	8.7	8	13	13	4.2	5	3.7	8	5	5	8	3.7	0	5	8	8	13	0	9.2	8				P12367	125199	---	Prkar2a	P12367
466	cAMP-dependent protein kinase type II-beta regulatory subunit OS=Mus musculus GN=Prkar2b PE=1 SV=3	cAMP-dependent protein kinase type II-beta regulatory subunit OS=Mus musculus GN=Prkar2b PE=1 SV=3	GQYFGELALVTNKPR-AATITATSPGALWGLDR-EGEHVIDQGDDGDNFYVIDR-TWGDAGAAAGGGIPSK	4	4	3	>sp|P31324|KAP3_MOUSE cAMP-dependent protein kinase type II-beta regulatory subunit OS=Mus musculus GN=Prkar2b PE=1 SV=3	1	4	4	3	16.3	16.3	12.7	46.167	416	16.009	7.9	12.3	7.7	16.3	7.7	16.3	16.3	16.3	0	0	11.5	16.3	0	4.1	16.3	11.5	0	7.9	11.5	16.3	16.3	7.9	7.9	11.5				P31324	54041237	19088	Prkar2b	P31324
467	Cancer-related nucleoside-triphosphatase homolog OS=Mus musculus GN=Ntpcr PE=2 SV=1	Cancer-related nucleoside-triphosphatase homolog OS=Mus musculus GN=Ntpcr PE=2 SV=1	AIEVLQSSGLPVDGFYTQEVR-IGFDVVTLSGAQGPLSR-VCIIDEIGK-VGQYVVNLDSFEQLALPVLR	4	4	4	>sp|Q9CQA9|NTPCR_MOUSE Cancer-related nucleoside-triphosphatase homolog OS=Mus musculus GN=Ntpcr PE=2 SV=1	1	4	4	4	35.3	35.3	35.3	20.667	190	6.9238	11.1	11.1	0	10.5	0	11.1	0	13.7	30.5	11.1	0	0	11.1	11.1	0	21.6	0	8.9	0	20	0	0	8.9	8.9				Q9CQA9	54036529	66566	Ntpcr	Q9CQA9
468	Caprin-1 OS=Mus musculus GN=Caprin1 PE=1 SV=2	Caprin-1 OS=Mus musculus GN=Caprin1 PE=1 SV=2	DGYQQNFK-LNEQYEHASIHLWDLLEGK-LNQDQLDAVSK-QGLSGVPILSEEELSLLDEFYK-TVLELQYVLDKLGDDDVR-YQEVTNNLEFAK	6	6	6	>sp|Q60865|CAPR1_MOUSE Caprin-1 OS=Mus musculus GN=Caprin1 PE=1 SV=2	1	6	6	6	12.7	12.7	12.7	78.168	707	78.502	12.7	3.3	8.9	3.1	5.8	6.4	9.1	9.1	3.1	5.8	5.8	3.3	5.8	1.7	6.4	9.1	8.9	4.4	1.7	12.7	4.4	8.9	11.6	11.6				Q60865	182676427	53872	Caprin1	Q60865
469	Cap-specific mRNA (nucleoside-2'-O-)-methyltransferase 1 OS=Mus musculus GN=Cmtr1 PE=1 SV=1	Cap-specific mRNA (nucleoside-2'-O-)-methyltransferase 1 OS=Mus musculus GN=Cmtr1 PE=1 SV=1	ADSLVEGTSSR-DTDINIFSYKPTLLTAK-FLLGLGK-HFVPTGVYIVR-IHAFVQDTTLSEPR	5	5	5	>sp|Q9DBC3|CMTR1_MOUSE Cap-specific mRNA (nucleoside-2-O-)-methyltransferase 1 OS=Mus musculus GN=Cmtr1 PE=1 SV=1	1	5	5	5	7.2	7.2	7.2	95.675	837	10.146	5.9	5	6.3	3	7.2	5.9	5	5.1	1.3	1.7	0.8	7.2	1.7	1.7	0	5.9	1.7	0	5.1	2.5	6.3	1.7	3.8	3.8				Q9DBC3	81906080	74157	Cmtr1	Q9DBC3
470	CapZ-interacting protein OS=Mus musculus GN=Rcsd1 PE=1 SV=1	CapZ-interacting protein OS=Mus musculus GN=Rcsd1 PE=1 SV=1	AEGTTIAEPDTK-AIVSPFHSPPSTPSSPGIR-LQANLAFDPAALLPGASPK-SPDANMPEEEGVVR-VELGQNGEEK	5	5	5	>sp|Q3UZA1|CPZIP_MOUSE CapZ-interacting protein OS=Mus musculus GN=Rcsd1 PE=1 SV=1	1	5	5	5	18	18	18	44.114	412	12.029	15.5	11.7	9.2	15.5	7.5	7.5	14.6	11.7	11.7	4.6	4.6	11.7	7.5	4.6	12.6	0	4.6	0	7.5	9.2	4.6	7.5	4.6	7				Q3UZA1	123788801	226594	Rcsd1	Q3UZA1
471	Carbonic anhydrase 1 OS=Mus musculus GN=Ca1 PE=2 SV=4	Carbonic anhydrase 1 OS=Mus musculus GN=Ca1 PE=2 SV=4	ADGLAILGVLMK-DSISLSPEQLAQLR-EIVNVGHSFHVIFDDSSNQSVLK-GGPLADSYR-GLLSSAEGEPAVPVLSNHRPPQPLK-LYPIANGNNQSPIDIK-TSEANHDSSLKPLSISYNPATAK-VGPANPSLQK-VLDALNSVK-YSGELHLVHWNSAK-YSSASEAISK	11	11	11	>sp|P13634|CAH1_MOUSE Carbonic anhydrase 1 OS=Mus musculus GN=Ca1 PE=2 SV=4	1	11	11	11	63.2	63.2	63.2	28.33	261	323.31	57.9	34.9	44.4	57.9	43.7	57.9	16.5	57.9	57.9	63.2	57.9	45.6	49	57.9	49	63.2	63.2	57.9	49	63.2	59.8	63.2	57.9	49			149	P13634	408360332	12346	Ca1	P13634
472	Carbonic anhydrase 2 OS=Mus musculus GN=Ca2 PE=1 SV=4	Carbonic anhydrase 2 OS=Mus musculus GN=Ca2 PE=1 SV=4	AVQQPDGLAVLGIFLK-AVQQPDGLAVLGIFLKIGPASQGLQK-DFPIANGDR-EPITVSSEQMSHFR-GGPLSDSYR-IGPASQGLQK-QSPVDIDTATAQHDPALQPLLISYDK-SIVNNGHSFNVEFDDSQDNAVLK-SIVNNGHSFNVEFDDSQDNAVLKGGPLSDSYR-TLNFNEEGDAEEAMVDNWRPAQPLK-VLEALHSIK-YAAELHLVHWNTK	12	12	12	>sp|P00920|CAH2_MOUSE Carbonic anhydrase 2 OS=Mus musculus GN=Ca2 PE=1 SV=4	1	12	12	12	59.2	59.2	59.2	29.032	260	323.31	50.8	44.6	59.2	54.2	44.6	59.2	28.5	59.2	55.8	59.2	59.2	59.2	54.2	59.2	54.2	59.2	49.6	54.2	54.2	59.2	53.8	59.2	54.2	44.6			222;240	P00920	146345383	12349	Ca2	P00920
473	Carbonic anhydrase 3 OS=Mus musculus GN=Ca3 PE=1 SV=3	Carbonic anhydrase 3 OS=Mus musculus GN=Ca3 PE=1 SV=3	DIKHDPSLQPWSASYDPGSAK-EKGEFQILLDALDK-GDNQSPIELHTK-GEFQILLDALDK-GGPLSGPYR-HDPSLQPWSASYDPGSAK-QPDGIAVVGIFLK-SLFSSAENEPPVPLVGNWRPPQPVK-VVFDDTYDR-YNTFGEALK-YNTFGEALKQPDGIAVVGIFLK	11	11	11	>sp|P16015|CAH3_MOUSE Carbonic anhydrase 3 OS=Mus musculus GN=Ca3 PE=1 SV=3	1	11	11	11	43.1	43.1	43.1	29.366	260	66.192	38.5	11.5	38.5	26.5	24.6	13.8	4.6	38.5	43.1	31.5	25.8	16.9	28.8	8.1	21.5	18.5	38.5	8.5	18.1	31.5	26.5	3.5	43.1	43.1				P16015	30581036	12350	Ca3	P16015
474	Carbonyl reductase [NADPH] 1 OS=Mus musculus GN=Cbr1 PE=1 SV=3	Carbonyl reductase [NADPH] 1 OS=Mus musculus GN=Cbr1 PE=1 SV=3	ELLPLIKPQGR-EYGGLDVLVNNAGIAFK-FHQLDIDNPQSIR-FSGDVVLAAR-GVHAEEGWPNSAYGVTK-IGVTVLSR-ILLNACCPGWVR-LQAEGLSPR-SETITEEELVGLMNK-SPEEGAETPVYLALLPPDAEGPHGQFVQDK-SPEEGAETPVYLALLPPDAEGPHGQFVQDKK-VVNVSSMVSLR-GIGFAITR	13	13	12	>sp|P48758|CBR1_MOUSE Carbonyl reductase [NADPH] 1 OS=Mus musculus GN=Cbr1 PE=1 SV=3	1	13	13	12	58.5	58.5	55.6	30.641	277	90.427	43	37.5	37.2	9.4	44.8	12.3	35.7	42.2	40.4	25.3	53.1	29.2	45.1	30.7	31.4	23.5	43	24.2	27.4	43	38.3	39.4	36.1	30.3		226;227	141	P48758	145559451	12408	Cbr1	P48758
475	Carbonyl reductase [NADPH] 3 OS=Mus musculus GN=Cbr3 PE=2 SV=1	Carbonyl reductase [NADPH] 3 OS=Mus musculus GN=Cbr3 PE=2 SV=1	AAVQQLQAEGLSPR-EYGGLNVLVNNAGIAFR-FHQLDIDDPQSIR-TVEEGAETPVYLALLPPDATEPHGQLVR-VALVTGANK-VVNISSLQGLK	7	6	6	>sp|Q8K354|CBR3_MOUSE Carbonyl reductase [NADPH] 3 OS=Mus musculus GN=Cbr3 PE=2 SV=1	1	7	6	6	36.1	33.2	33.2	30.953	277	21.319	31	12.3	27.1	33.2	25.3	27.1	2.9	27.1	31.4	22	17	26.7	22	22	19.1	32.9	17	30	16.6	33.2	19.9	21.7	36.1	28.2				Q8K354	81914662	109857	Cbr3	Q8K354
476	Carboxylesterase 1C OS=Mus musculus GN=Ces1c PE=1 SV=4; Liver carboxylesterase 1 OS=Mus musculus GN=Ces1 PE=2 SV=1; Carboxylesterase 1E OS=Mus musculus GN=Ces1e PE=1 SV=1	Carboxylesterase 1C OS=Mus musculus GN=Ces1c PE=1 SV=4	AISESGVVINTNVGK-AISESGVVINTNVGKK-EGASEEETNLSK-ISEDCLYLNIYSPADLTK-LKAEEVAFWTELLAK-MNEETASLLLR-QKTESELLEISGK-RPQTVEGDHGDEIFFVFGAPLLK-SFNTVPYIVGFNK-YISLEGFEQPVAVFLGVPFAKPPLGSLR-APEEILAEK-FWANFAR	12;2;1	12;2;1	10;0;0	>sp|P23953|EST1C_MOUSE Carboxylesterase 1C OS=Mus musculus GN=Ces1c PE=1 SV=4	3	12	12	10	29.8	29.8	26.9	61.055	554	59.523	24.7	14.6	6.9	18.2	15.5	24.5	24.5	10.3	18.8	13	15.2	15.5	11.4	12.6	11.9	18.1	13.2	14.3	23.8	19.3	10.3	19.3	28.5	23.3		116	360	P23953	341941117	13884	Ces1c	P23953
477	Carboxylesterase 1D OS=Mus musculus GN=Ces1d PE=1 SV=1	Carboxylesterase 1D OS=Mus musculus GN=Ces1d PE=1 SV=1	AVIGDHGDEIFSVFGSPFLK-LDLLGNPK	4	2	2	>sp|Q8VCT4|CES1D_MOUSE Carboxylesterase 1D OS=Mus musculus GN=Ces1d PE=1 SV=1	1	4	2	2	7.8	5	5	61.787	565	6.1202	6.4	1.6	1.6	5.1	1.6	2.8	6.4	2.8	3	5.1	1.6	1.6	1.6	2.8	5.1	6.4	5.1	1.6	2.8	2.8	2.8	2.8	5.1	5.1				Q8VCT4	57013389	104158	Ces1d	Q8VCT4
478	Carboxymethylenebutenolidase homolog OS=Mus musculus GN=Cmbl PE=2 SV=1	Carboxymethylenebutenolidase homolog OS=Mus musculus GN=Cmbl PE=2 SV=1	AGVSVYGIIR-AVIVVQDIFGWQLPNTR-DSEDVYNLK-EVDAVLR-NLIEWLNK-NPTLFIFAENDTVIPLEQVSTLTQK	6	6	6	>sp|Q8R1G2|CMBL_MOUSE Carboxymethylenebutenolidase homolog OS=Mus musculus GN=Cmbl PE=2 SV=1	1	6	6	6	31	31	31	27.902	245	12.912	18	3.7	13.9	21.2	10.6	21.2	0	10.2	31	10.2	10.2	13.9	3.7	0	0	31	10.6	16.7	6.5	27.3	24.5	7.8	20.8	18				Q8R1G2	81901439	69574	Cmbl	Q8R1G2
479	Carboxypeptidase A1 OS=Mus musculus GN=Cpa1 PE=2 SV=1	Carboxypeptidase A1 OS=Mus musculus GN=Cpa1 PE=2 SV=1	AGLPIDVR-EWVTQASGVWFAK-FSTGGTNRPAIWIDTGIHSR-IQIGSTFEGRPINVLK-ISATDEAQVQK-QQMSAFQAR-SHTEGSLCVGVDPNR-SIVDFVTSHGNIK-VPFPTIQSVK-YGSIIDTIYQASGSTIDWTYSQGIK-YSFTFELR	11	11	10	>sp|Q7TPZ8|CBPA1_MOUSE Carboxypeptidase A1 OS=Mus musculus GN=Cpa1 PE=2 SV=1	1	11	11	10	35.3	35.3	33.4	47.384	419	137.2	10.7	24.6	19.8	0	3.8	21.7	21.7	18.6	0	23.6	3.8	0	0	19.1	35.3	6.2	0	0	6.2	0	0	14.1	29.6	21.7		248	104	Q7TPZ8	66774004	109697	Cpa1	Q7TPZ8
480	Carboxypeptidase A2 OS=Mus musculus GN=Cpa2 PE=2 SV=1	Carboxypeptidase A2 OS=Mus musculus GN=Cpa2 PE=2 SV=1	CAKPDDFNELDEVAQR-DTGYYGFLLPAK-EWVTQATALWTANK-QILPTAEETWLGLK-SIVDFIK-VPFASIQDVK-YSFAFELR	7	7	7	>sp|Q504N0|CBPA2_MOUSE Carboxypeptidase A2 OS=Mus musculus GN=Cpa2 PE=2 SV=1	1	7	7	7	19.4	19.4	19.4	47.057	417	28.247	0	2.9	5.3	0	0	14.4	17.7	14.4	0	12	0	0	0	2.9	15.6	0	0	0	0	0	0	0	14.4	14.4		318		Q504N0	81908880	232680	Cpa2	Q504N0
481	Carboxypeptidase B2 OS=Mus musculus GN=Cpb2 PE=1 SV=1	Carboxypeptidase B2 OS=Mus musculus GN=Cpb2 PE=1 SV=1	IYIGSSFEK	3	1	1	>sp|Q9JHH6|CBPB2_MOUSE Carboxypeptidase B2 OS=Mus musculus GN=Cpb2 PE=1 SV=1	1	3	1	1	10.2	2.1	2.1	48.87	422	2.5932	0	3.8	0	6.4	0	6.4	6.4	1.7	0	6.4	0	1.7	0	0	0	10.2	2.1	2.1	10.2	8.1	1.7	6.4	8.5	1.7				Q9JHH6	62899892	56373	Cpb2	Q9JHH6
482	Carboxypeptidase Q OS=Mus musculus GN=Cpq PE=2 SV=1	Carboxypeptidase Q OS=Mus musculus GN=Cpq PE=2 SV=1	IIVYNQPYTGYEK-LGLLVDTVGPR-VGAVASLIQSVASFSIYSPHTGIQK-VQGAVEAAK	4	4	4	>sp|Q9WVJ3|CBPQ_MOUSE Carboxypeptidase Q OS=Mus musculus GN=Cpq PE=2 SV=1	1	4	4	4	12.3	12.3	12.3	51.813	470	15.005	10.4	2.3	5.1	5.3	10.4	8.1	7.7	5.1	8.1	8.1	10.4	10.4	2.3	2.8	0	7.7	9.6	5.1	10.4	10.4	10.4	10.4	10.4	10.4				Q9WVJ3	81882084	54381	Cpq	Q9WVJ3
483	Carcinoembryonic antigen-related cell adhesion molecule 10 OS=Mus musculus GN=Ceacam10 PE=1 SV=1	Carcinoembryonic antigen-related cell adhesion molecule 10 OS=Mus musculus GN=Ceacam10 PE=1 SV=1	FVTSINR-IILGPAHSDR-NDEGVYTLYMLDQNFEITPISVR	3	3	3	>sp|Q61400|CEAMA_MOUSE Carcinoembryonic antigen-related cell adhesion molecule 10 OS=Mus musculus GN=Ceacam10 PE=1 SV=1	1	3	3	3	15.1	15.1	15.1	29.473	265	19.848	0	0	0	0	0	0	0	0	0	0	0	0	0	0	0	15.1	0	0	6.4	15.1	0	6.4	0	0			124	Q61400	2497288	26366	Ceacam10	Q61400
484	Carnitine O-palmitoyltransferase 2, mitochondrial OS=Mus musculus GN=Cpt2 PE=1 SV=2	Carnitine O-palmitoyltransferase 2, mitochondrial OS=Mus musculus GN=Cpt2 PE=1 SV=2	AGLLEPEVFHLNPAR-ATNLTVSAVR-DSTQTPAIAPQSQPAATDSSVSVQK-FFNEVFR-SEYNDQLTR-SFNLIVAK-YILSDSSPVPEFPLAYLTSENR-YLSAQKPLLNDSQFR	8	8	8	>sp|P52825|CPT2_MOUSE Carnitine O-palmitoyltransferase 2, mitochondrial OS=Mus musculus GN=Cpt2 PE=1 SV=2	1	8	8	8	16.9	16.9	16.9	73.98	658	13.605	10.6	4.9	4.6	13.2	10.9	8.7	7.1	5.6	0	2.7	3.8	7.1	10.9	4.6	3.6	6.4	10.8	6.1	3.8	4.9	0	7.3	7.1	6.1				P52825	341940396	12896	Cpt2	P52825
485	Casein kinase II subunit alpha OS=Mus musculus GN=Csnk2a1 PE=1 SV=2	Casein kinase II subunit alpha OS=Mus musculus GN=Csnk2a1 PE=1 SV=2	EYWDYESHVVEWGNQDDYQLVR-FVHSENQHLVSPEALDFLDK-GGPNIITLADIVKDPVSR-LIDWGLAEFYHPGQEYNVR-QLYQTLTDYDIR-TPALVFEHVNNTDFK-VLGTEDLYDYIDKYNIELDPR	7	7	7	>sp|Q60737|CSK21_MOUSE Casein kinase II subunit alpha OS=Mus musculus GN=Csnk2a1 PE=1 SV=2	1	7	7	7	32.5	32.5	32.5	45.133	391	63.419	17.6	16.9	21.5	21.5	21.5	27.1	16.4	21.5	24	9.7	23	16.6	9.7	4.6	19.4	22.5	0	15.1	11.5	32.5	4.6	9.7	22.3	13.6				Q60737	341940405	12995	Csnk2a1	Q60737
486	Casein kinase II subunit alpha' OS=Mus musculus GN=Csnk2a2 PE=2 SV=1	Casein kinase II subunit alpha' OS=Mus musculus GN=Csnk2a2 PE=2 SV=1	HLVSPEALDLLDK-LIDWGLAEFYHPAQEYNVR-QLYQILTDFDIR-VLGTDELYGYLKK	4	4	4	>sp|O54833|CSK22_MOUSE Casein kinase II subunit alpha OS=Mus musculus GN=Csnk2a2 PE=2 SV=1	1	4	4	4	16.3	16.3	16.3	41.215	350	10.65	12.6	3.4	12.6	12.6	12.6	7.1	12.6	8.9	0	7.1	12.6	7.1	3.7	3.7	3.4	8.9	0	3.7	3.7	12.6	0	0	8.9	0				O54833	10720047	13000	Csnk2a2	O54833
487	Casein kinase II subunit beta OS=Mus musculus GN=Csnk2b PE=1 SV=1	Casein kinase II subunit beta OS=Mus musculus GN=Csnk2b PE=1 SV=1	RPANQFVPR-YQQGDFGYCPR	2	2	2	>sp|P67871|CSK2B_MOUSE Casein kinase II subunit beta OS=Mus musculus GN=Csnk2b PE=1 SV=1	1	2	2	2	9.3	9.3	9.3	24.942	215	5.6467	9.3	4.2	9.3	0	4.2	4.2	4.2	4.2	4.2	0	0	4.2	0	0	4.2	9.3	5.1	5.1	0	9.3	5.1	0	0	5.1		109		P67871	54037523	13001	Csnk2b	P67871
488	Caspase-1 OS=Mus musculus GN=Casp1 PE=1 SV=1	Caspase-1 OS=Mus musculus GN=Casp1 PE=1 SV=1	FSFEQPEFR-FYLFPGH-GSLFIESLIK-LALIICNTEFQHLSPR-LLLEDLGYTVK-QFINSVSIGTINGLLDELLEKR-QGVVLLK-VGAQVDLR	8	8	8	>sp|P29452|CASP1_MOUSE Caspase-1 OS=Mus musculus GN=Casp1 PE=1 SV=1	1	8	8	8	22.4	22.4	22.4	45.64	402	14.36	6.7	4.7	2.5	6.5	4	11.9	8	8.7	10.2	4.2	10.9	8.7	3.5	4	2.2	13.9	1.7	4	8.2	16.9	2.2	8	9.5	7.7		168		P29452	266322	12362	Casp1	P29452
489	Caspase-3 OS=Mus musculus GN=Casp3 PE=1 SV=1	Caspase-3 OS=Mus musculus GN=Casp3 PE=1 SV=1	IPVEADFLYAYSTAPGYYSWR-LFIIQACR-SGTDVDAANLR-SINNFEVK-SVDSGIYLDSSYK-VATEFESFSLDSTFHAK	6	6	6	>sp|P70677|CASP3_MOUSE Caspase-3 OS=Mus musculus GN=Casp3 PE=1 SV=1	1	6	6	6	28.2	28.2	28.2	31.474	277	37.162	14.4	14.8	8.7	14.4	14.4	17.7	4	14.4	25.3	11.6	28.2	20.6	14.4	14.4	14.4	25.3	14.4	14.4	11.6	28.2	19.1	11.6	25.3	16.2		163		P70677	2493527	12367	Casp3	P70677
490	Caspase-6 OS=Mus musculus GN=Casp6 PE=2 SV=1	Caspase-6 OS=Mus musculus GN=Casp6 PE=2 SV=1	EVFDPAEQYK-FFWHLTLPER-FSDLGFEVK-IEIQTLTGLFK-IEIQTLTGLFKGDK-YGSSLEFTELLTLVNR	6	6	6	>sp|O08738|CASP6_MOUSE Caspase-6 OS=Mus musculus GN=Casp6 PE=2 SV=1	1	6	6	6	21.4	21.4	21.4	31.595	276	10.336	10.9	14.1	8.7	4	7.2	8.7	0	15.6	17	7.2	18.1	5.1	7.2	7.6	13.4	14.5	10.9	4	0	14.5	4	7.2	16.7	7.6				O08738	2493529	12368	Casp6	O08738
491	Caspase-7 OS=Mus musculus GN=Casp7 PE=1 SV=2	Caspase-7 OS=Mus musculus GN=Casp7 PE=1 SV=2	GTELDDGIQADSGPINDIDANPR-LFFIQACR-SSIISSILLK	3	3	3	>sp|P97864|CASP7_MOUSE Caspase-7 OS=Mus musculus GN=Casp7 PE=1 SV=2	1	3	3	3	13.5	13.5	13.5	34.06	303	8.1165	3.3	10.9	13.5	10.9	10.2	13.5	10.9	13.5	10.9	3.3	5.9	13.5	3.3	0	3.3	10.9	5.9	0	0	13.5	2.6	3.3	7.6	0		186		P97864	2493530	12369	Casp7	P97864
492	Caspase-8 OS=Mus musculus GN=Casp8 PE=1 SV=1	Caspase-8 OS=Mus musculus GN=Casp8 PE=1 SV=1	EASIYDLTSYFTGSK-ELRDPDNAQISPYR-FLLNNEIPK	3	3	3	>sp|O89110|CASP8_MOUSE Caspase-8 OS=Mus musculus GN=Casp8 PE=1 SV=1	1	3	3	3	7.9	7.9	7.9	55.356	480	7.0909	7.9	1.9	2.9	4.8	4.8	4.8	4.8	7.9	4.8	1.9	1.9	7.9	2.9	0	1.9	0	5	5	1.9	4.8	0	1.9	4.8	1.9				O89110	25090576	12370	Casp8	O89110
493	Catalase OS=Mus musculus GN=Cat PE=1 SV=4	Catalase OS=Mus musculus GN=Cat PE=1 SV=4	ASQRPDVLTTGGGNPIGDK-ASQRPDVLTTGGGNPIGDKLNIMTAGSR-DAILFPSFIHSQK-DAQLFIQK-DYPLIPVGK-EAETFPFNPFDLTK-FNSANEDNVTQVR-FSTVTGESGSADTVR-FSTVTGESGSADTVRDPR-FYTEDGNWDLVGNNTPIFFIR-GAGAFGYFEVTHDITR-GPLLVQDVVFTDEMAHFDR-GPLLVQDVVFTDEMAHFDRER-LAQEDPDYGLR-LGPNYLQIPVNCPYR-LVNADGEAVYCK-NFTDVHPDYGAR-NLPVGEAGR-RFNSANEDNVTQVR	19	19	19	>sp|P24270|CATA_MOUSE Catalase OS=Mus musculus GN=Cat PE=1 SV=4	1	19	19	19	41.9	41.9	41.9	59.795	527	158.21	38.1	18	28.5	36.1	36.4	31.1	32.8	32.3	30.6	36.2	19.5	30.6	25.4	20.9	22	23.9	27.7	29.4	27.9	35.1	32.1	37.4	36.2	36.6		232;377		P24270	341940638	12359	Cat	P24270
494	Catechol O-methyltransferase domain-containing protein 1 OS=Mus musculus GN=Comtd1 PE=2 SV=1	Catechol O-methyltransferase domain-containing protein 1 OS=Mus musculus GN=Comtd1 PE=2 SV=1	GEVLQPQPR-LLPPEDNPLWQYLLSR-VYISLLPLDDGLSLAFK	3	3	3	>sp|Q8BIG7|CMTD1_MOUSE Catechol O-methyltransferase domain-containing protein 1 OS=Mus musculus GN=Comtd1 PE=2 SV=1	1	3	3	3	16	16	16	28.96	262	5.3008	6.5	0	9.5	16	0	16	0	0	16	6.1	6.1	0	0	3.4	3.4	16	0	16	3.4	16	16	0	6.1	6.1				Q8BIG7	81873868	69156	Comtd1	Q8BIG7
495	Catechol O-methyltransferase OS=Mus musculus GN=Comt PE=1 SV=2	Catechol O-methyltransferase OS=Mus musculus GN=Comt PE=1 SV=2	AVYQGPGSSPVK-EYRPSLVLELGAYCGYSAVR-GTVLLADNVIVPGTPDFLAYVR-KGTVLLADNVIVPGTPDFLAYVR-VSILIGASQDLIPQLK-VSILIGASQDLIPQLKK-YLPDTLLLEECGLLR	7	7	7	>sp|O88587|COMT_MOUSE Catechol O-methyltransferase OS=Mus musculus GN=Comt PE=1 SV=2	1	7	7	7	32.8	32.8	32.8	29.486	265	107.04	15.1	0	20.8	28.3	11.7	15.1	0	14.7	20.8	20.8	14.7	15.1	0	14.7	0	15.1	6	20.8	6	20.8	15.1	19.2	15.1	20.4		112;200		O88587	408360029	12846	Comt	O88587
496	Catenin alpha-1 OS=Mus musculus GN=Ctnna1 PE=1 SV=1	Catenin alpha-1 OS=Mus musculus GN=Ctnna1 PE=1 SV=1	AEVQNLGGELVVSGVDSAMSLIQAAK-IAEQVASFQEEK-QIIVDPLSFSEER-QLQQAVTGISNAAQATASDDAAQHQGGSGGELAYALNNFDK-SDALNSAIDK	5	5	5	>sp|P26231|CTNA1_MOUSE Catenin alpha-1 OS=Mus musculus GN=Ctnna1 PE=1 SV=1	1	5	5	5	11.3	11.3	11.3	100.11	906	11.053	5.6	7.3	10.2	7.3	2.8	1.3	10.2	11.3	4.5	1.3	0	2.8	0	1.4	1.4	5.8	1.4	0	1.3	8.8	4.5	1.1	5.6	7.3				P26231	117607	12385	Ctnna1	P26231
497	Catenin beta-1 OS=Mus musculus GN=Ctnnb1 PE=1 SV=1	Catenin beta-1 OS=Mus musculus GN=Ctnnb1 PE=1 SV=1	AAVSHWQQQSYLDSGIHSGATTTAPSLSGK-GLNTIPLFVQLLYSPIENIQR-HAVVNLINYQDDAELATR-LVQLLVR-NEGVATYAAAVLFR-EGLLAIFK	6	6	5	>sp|Q02248|CTNB1_MOUSE Catenin beta-1 OS=Mus musculus GN=Ctnnb1 PE=1 SV=1	1	6	6	5	12.5	12.5	11.5	85.47	781	13.081	7.8	6.7	6.7	6.7	6.7	3.7	9	3.8	9.2	2.8	0	0	1.8	0	3.8	4.5	1.8	0	2.8	9.3	6.7	1.8	11.7	3.7				Q02248	399310	12387	Ctnnb1	Q02248
498	Catenin delta-1 OS=Mus musculus GN=Ctnnd1 PE=1 SV=2	Catenin delta-1 OS=Mus musculus GN=Ctnnd1 PE=1 SV=2	AAALVLQTIWGYK-ALSAIAELLTSEHER-FHPEPYGLEDDQR-GYELLFQPEVVR-IYISLLK-SDFQVNLNNASR	6	6	6	>sp|P30999|CTND1_MOUSE Catenin delta-1 OS=Mus musculus GN=Ctnnd1 PE=1 SV=2	1	6	6	6	7.7	7.7	7.7	104.92	938	13.817	4.3	3.4	5.5	3.4	4.2	4.9	5.7	6.3	5.7	2.6	2.9	6.3	2	2	2.7	7.7	2.9	1.3	5.5	5	4.3	2.6	4.3	5				P30999	166214912	12388	Ctnnd1	P30999
499	Cathelin-related antimicrobial peptide OS=Mus musculus GN=Camp PE=2 SV=1	Cathelin-related antimicrobial peptide OS=Mus musculus GN=Camp PE=2 SV=1	AVDDFNQQSLDTNLYR-LLDLDPEPQGDEDPDTPK-LLDLDPEPQGDEDPDTPKSVR-QLPEQCAFK	4	4	4	>sp|P51437|CRAMP_MOUSE Cathelin-related antimicrobial peptide OS=Mus musculus GN=Camp PE=2 SV=1	1	4	4	4	26.6	26.6	26.6	19.581	173	249.15	24.9	26.6	26.6	24.9	14.5	24.9	19.7	19.7	19.7	26.6	14.5	24.9	19.7	19.7	19.7	19.7	19.7	19.7	26.6	26.6	19.7	19.7	24.9	24.9		94		P51437	1706115	12796	Camp	P51437
500	Cathepsin B OS=Mus musculus GN=Ctsb PE=1 SV=2	Cathepsin B OS=Mus musculus GN=Ctsb PE=1 SV=2	DQGSCGSCWAFGAVEAISDR-EDKHFGYTSYSVSNSVK-EIMAEIYK-EQWSNCPTIGQIR-GENHCGIESEIVAGIPR-HFGYTSYSVSNSVK-ILGWGVENGVPYWLAANSWNLDWGDNGFFK-ILRGENHCGIESEIVAGIPR-NFYNVDISYLK-NGPVEGAFTVFSDFLTYK-SCEAGYSPSYK-SCEAGYSPSYKEDK-VAFGEDIDLPETFDAR	13	13	13	>sp|P10605|CATB_MOUSE Cathepsin B OS=Mus musculus GN=Ctsb PE=1 SV=2	1	13	13	13	48.4	48.4	48.4	37.279	339	313.57	38.6	24.5	35.4	36.3	27.1	36.3	11.8	32.2	30.7	32.7	26.3	31.3	24.8	24.8	35.4	27.1	25.4	27.1	33.3	36.3	30.7	32.2	38.3	27.4		93;105;108;211;319	240	P10605	115712	13030	Ctsb	P10605
501	Cathepsin D OS=Mus musculus GN=Ctsd PE=1 SV=1	Cathepsin D OS=Mus musculus GN=Ctsd PE=1 SV=1	AIGAVPLIQGEYMIPCEK-FDGILGMGYPHISVNNVLPVFDNLMQQK-GGCEAIVDTGTSLLVGPVEEVK-NIFSFYLNR-NIFSFYLNRDPEGQPGGELMLGGTDSK-QIFGEATK-QIFGEATKQPGIVFVAAK-QPGIVFVAAK-TTEPVSELLK-VGFANAVVL-VSSLPTVYLK	11	11	11	>sp|P18242|CATD_MOUSE Cathepsin D OS=Mus musculus GN=Ctsd PE=1 SV=1	1	11	11	11	34.6	34.6	34.6	44.953	410	88.411	16.8	13.7	13.7	22.7	20.5	9.3	11.5	9.3	15.9	11.5	23.4	13.7	9.3	11.5	11.5	22.7	11.5	22.7	13.7	32.4	11.5	16.8	22.7	15.9		288;327	199;217;324	P18242	115718	13033	Ctsd	P18242
502	Cathepsin E OS=Mus musculus GN=Ctse PE=1 SV=2	Cathepsin E OS=Mus musculus GN=Ctse PE=1 SV=2	AQGQLSEFWR-GNNQVGLAPAVP-QFYSVFDR	3	3	3	>sp|P70269|CATE_MOUSE Cathepsin E OS=Mus musculus GN=Ctse PE=1 SV=2	1	3	3	3	7.6	7.6	7.6	42.937	397	21.345	3	5.5	2.5	4.5	3	4.5	2.5	3	0	5	5.5	4.5	0	0	4.5	7.6	2.5	0	5	7.6	5.5	0	7.6	2.5				P70269	341940308	13034	Ctse	P70269
503	Cathepsin G OS=Mus musculus GN=Ctsg PE=1 SV=2	Cathepsin G OS=Mus musculus GN=Ctsg PE=1 SV=2	GTNVLQEVQLR-HPDYNPQNIR-NDIMLLQLR-SGSVKPVALPQASK-TQQLITVLR	5	5	5	>sp|P28293|CATG_MOUSE Cathepsin G OS=Mus musculus GN=Ctsg PE=1 SV=2	1	5	5	5	20.3	20.3	20.3	29.095	261	16.961	0	8.8	0	3.8	3.4	16.9	0	0	0	20.3	3.4	16.9	3.8	0	7.7	11.5	3.4	3.8	12.6	11.5	0	16.9	3.4	16.9			110	P28293	1705635	13035	Ctsg	P28293
505	Cathepsin S OS=Mus musculus GN=Ctss PE=1 SV=2	Cathepsin S OS=Mus musculus GN=Ctss PE=1 SV=2	DPTLDYHWDLWK-GPVSVGIDASHSSFFFYK-LISLSAQNLVDCSNEEK-LISLSAQNLVDCSNEEKYGNK-NHCGIASYCSYPEI-NSWGLNFGDQGYIR-TLPDTVDWR-YIQLPFGDEDALK-YIQLPFGDEDALKEAVATK	9	9	9	>sp|O70370|CATS_MOUSE Cathepsin S OS=Mus musculus GN=Ctss PE=1 SV=2	1	9	9	9	31.5	31.5	31.5	38.474	340	283.01	22.4	14.1	23.2	20	18.2	23.5	8.8	17.9	20	23.5	15	31.5	14.7	15	14.7	26.2	15.9	27.6	15.3	28.8	22.6	30.3	24.7	15.9		178;329;335		O70370	341940310	13040	Ctss	O70370
506	Cathepsin Z OS=Mus musculus GN=Ctsz PE=2 SV=1	Cathepsin Z OS=Mus musculus GN=Ctsz PE=2 SV=1	HGIPDETCNNYQAK-IVTSTYK-NSWGEPWGEK-NVNGVNYASVTR-VGDYGSLSGR	5	5	5	>sp|Q9WUU7|CATZ_MOUSE Cathepsin Z OS=Mus musculus GN=Ctsz PE=2 SV=1	1	5	5	5	17.3	17.3	17.3	33.996	306	57.844	14.1	17.3	17.3	15	17.3	17.3	17.3	17.3	15	17.3	17.3	17.3	17.3	7.2	15	12.7	7.2	7.2	17.3	17.3	12.7	17.3	15	12.7		156		Q9WUU7	12585209	64138	Ctsz	Q9WUU7
507	Cation-dependent mannose-6-phosphate receptor OS=Mus musculus GN=M6pr PE=1 SV=1	Cation-dependent mannose-6-phosphate receptor OS=Mus musculus GN=M6pr PE=1 SV=1	HTLAANFNPVSEER-NEVALLER-SFESTVGQGSDTYSYIFR	3	3	3	>sp|P24668|MPRD_MOUSE Cation-dependent mannose-6-phosphate receptor OS=Mus musculus GN=M6pr PE=1 SV=1	1	3	3	3	14.4	14.4	14.4	31.172	278	47.533	14.4	14.4	14.4	14.4	14.4	14.4	7.9	14.4	14.4	5	14.4	14.4	7.9	7.9	14.4	14.4	0	14.4	7.9	14.4	11.5	11.5	14.4	5				P24668	127294	17113	M6pr	P24668
508	Caveolin-1 OS=Mus musculus GN=Cav1 PE=1 SV=1	Caveolin-1 OS=Mus musculus GN=Cav1 PE=1 SV=1	ASFTTFTVTK-IDFEDVIAEPEGTHSFDGIWK-YVDSEGHLYTVPIR	3	3	3	>sp|P49817|CAV1_MOUSE Caveolin-1 OS=Mus musculus GN=Cav1 PE=1 SV=1	1	3	3	3	25.3	25.3	25.3	20.538	178	11.634	19.7	5.6	13.5	17.4	7.9	25.3	0	25.3	25.3	0	0	13.5	13.5	11.8	5.6	11.8	5.6	11.8	7.9	19.7	17.4	13.5	13.5	19.7				P49817	1705645	12389	Cav1	P49817
509	CB1 cannabinoid receptor-interacting protein 1 OS=Mus musculus GN=Cnrip1 PE=1 SV=1	CB1 cannabinoid receptor-interacting protein 1 OS=Mus musculus GN=Cnrip1 PE=1 SV=1	LLTGSSYK-VVYTGIYDTEGVAPTK	2	2	2	>sp|Q5M8N0|CNRP1_MOUSE CB1 cannabinoid receptor-interacting protein 1 OS=Mus musculus GN=Cnrip1 PE=1 SV=1	1	2	2	2	14.6	14.6	14.6	18.612	164	3.6858	14.6	9.8	9.8	0	9.8	4.9	9.8	4.9	9.8	14.6	0	14.6	9.8	0	0	14.6	14.6	9.8	9.8	14.6	14.6	0	9.8	14.6				Q5M8N0	68565118	380686	Cnrip1	Q5M8N0
510	CCA tRNA nucleotidyltransferase 1, mitochondrial OS=Mus musculus GN=Trnt1 PE=1 SV=1	CCA tRNA nucleotidyltransferase 1, mitochondrial OS=Mus musculus GN=Trnt1 PE=1 SV=1	ATDSSEPLKPYQDFVIDSR-EIGALLQQLR-GLAGISGER-IDVTTDGR-LHEENFEVTTLR-LQSPEFQSLFTEGLK-NLGLFIVK	7	7	7	>sp|Q8K1J6|TRNT1_MOUSE CCA tRNA nucleotidyltransferase 1, mitochondrial OS=Mus musculus GN=Trnt1 PE=1 SV=1	1	7	7	7	18.7	18.7	18.7	49.895	434	13.988	7.6	12	7.8	10.1	7.6	1.8	12	10.1	12	4.1	12	10.1	8.5	4.1	10.4	6.2	0	8.3	6.7	7.6	4.1	1.8	7.6	7.6				Q8K1J6	37537798	70047	Trnt1	Q8K1J6
511	CCR4-NOT transcription complex subunit 1 OS=Mus musculus GN=Cnot1 PE=1 SV=2	CCR4-NOT transcription complex subunit 1 OS=Mus musculus GN=Cnot1 PE=1 SV=2	ELNPSLNFK-GQQELLYVVPFVAK-NLILSAFPR-SLDLIESLLR-SLLEVVVLSR-SPVTFLSDLR	6	6	6	>sp|Q6ZQ08|CNOT1_MOUSE CCR4-NOT transcription complex subunit 1 OS=Mus musculus GN=Cnot1 PE=1 SV=2	1	6	6	6	2.6	2.6	2.6	266.8	2375	7.3698	1	1.8	1.2	2.6	1.8	1	1.4	1.8	1.2	2.2	1.8	1.8	1.4	0	1.6	1.8	0.8	1.2	1.2	1.4	0.8	1.8	1	1.8				Q6ZQ08	166216087	234594	Cnot1	Q6ZQ08
512	CCR4-NOT transcription complex subunit 11 OS=Mus musculus GN=Cnot11 PE=2 SV=1	CCR4-NOT transcription complex subunit 11 OS=Mus musculus GN=Cnot11 PE=2 SV=1	GGQEPDRPPLSGFLPPITPPEK-SPLSSPQQTQLLGELEKDPK-TEPLAANPFAASFAHLLNPAPPAR	3	3	3	>sp|Q9CWN7|CNO11_MOUSE CCR4-NOT transcription complex subunit 11 OS=Mus musculus GN=Cnot11 PE=2 SV=1	1	3	3	3	13.1	13.1	13.1	54.959	505	4.0783	0	0	0	0	0	0	0	0	8.7	0	13.1	0	0	0	0	0	0	0	0	4	0	0	0	0				Q9CWN7	71152359	52846	Cnot11	Q9CWN7
513	CD177 antigen OS=Mus musculus GN=Cd177 PE=2 SV=1	CD177 antigen OS=Mus musculus GN=Cd177 PE=2 SV=1	GDIALQGGGLTTR-GGGIISDLK-GGGVISDLK-ILEELPTPTVPGSLR-LPLQWTAGQK-NVAELPLR-TGPGLSVTSYTR-TGPGLSVVSYTR-VNLVIIK	9	9	9	>sp|Q8R2S8|CD177_MOUSE CD177 antigen OS=Mus musculus GN=Cd177 PE=2 SV=1	1	9	9	9	11.6	11.6	11.6	87.09	817	17.504	2	11.6	5.1	5.8	5.6	9.3	4.8	4.2	0	10.5	9.3	10.5	5.3	6.4	1.8	8.2	4.8	5.8	8.9	6.2	3.7	10.5	6.2	8.2				Q8R2S8	81901560	68891	Cd177	Q8R2S8
514	CD180 antigen OS=Mus musculus GN=Cd180 PE=1 SV=2	CD180 antigen OS=Mus musculus GN=Cd180 PE=1 SV=2	DAQSPFQNLHLLK-ECPQLELLDLAFTR-ISIILPSLLPILSQQR-LDTLVLTANPLIFMAETALSGPK-TEAFKECPQLELLDLAFTR-TLESLYLGSNHISSIK-TNSLQTLGR-VLDFQNNAIHYLSK	8	8	8	>sp|Q62192|CD180_MOUSE CD180 antigen OS=Mus musculus GN=Cd180 PE=1 SV=2	1	8	8	8	16.6	16.6	16.6	74.302	661	89.047	15.9	10.3	10.3	4.8	12.4	10.3	13.2	8.9	6.5	2.4	2.1	12.4	4.5	2.1	2.4	4.8	2.4	9.1	6.5	9.7	4.5	8.9	12.4	13.2		419		Q62192	341940335	17079	Cd180	Q62192
515	CD209 antigen-like protein B OS=Mus musculus GN=Cd209b PE=1 SV=2	CD209 antigen-like protein B OS=Mus musculus GN=Cd209b PE=1 SV=2	AQLVIINSDEEQTFLQQTSK-EATWLWVDGSTLSSR-ILQELTQLTDELTSR	3	3	3	>sp|Q8CJ91|C209B_MOUSE CD209 antigen-like protein B OS=Mus musculus GN=Cd209b PE=1 SV=2	1	3	3	3	15.4	15.4	15.4	37.111	325	9.28	6.2	9.2	4.6	10.8	10.8	15.4	15.4	9.2	9.2	0	4.6	15.4	0	0	4.6	0	0	0	10.8	4.6	4.6	0	6.2	10.8				Q8CJ91	46395849	69165	Cd209b	Q8CJ91
516	CD2-associated protein OS=Mus musculus GN=Cd2ap PE=1 SV=3	CD2-associated protein OS=Mus musculus GN=Cd2ap PE=1 SV=3	EGVFPDNFAVQISELDKDFPKPK-LGLFPSNFVK-SNLEVEIAK-SVDLDAFVAR-TLFPYTGTNEDELTFR-VNTAAFLTPLELK	6	6	6	>sp|Q9JLQ0|CD2AP_MOUSE CD2-associated protein OS=Mus musculus GN=Cd2ap PE=1 SV=3	1	6	6	6	12.7	12.7	12.7	70.449	637	12.14	9.6	9.1	9.6	9.1	7.5	5	12.7	12.7	8.6	2	0	6.6	2	2	1.6	9.6	2	2	7.5	11.1	3	7.2	11.1	11.1				Q9JLQ0	341940543	12488	Cd2ap	Q9JLQ0
517	CD44 antigen OS=Mus musculus GN=Cd44 PE=1 SV=3	CD44 antigen OS=Mus musculus GN=Cd44 PE=1 SV=3	LVINGGNGTVEDR-NLQSVDMK-YGFIEGNVVIPR	3	3	3	>sp|P15379|CD44_MOUSE CD44 antigen OS=Mus musculus GN=Cd44 PE=1 SV=3	1	3	3	3	4.2	4.2	4.2	85.616	778	21.346	3.2	4.2	4.2	3.2	3.2	3.2	3.2	3.2	1.5	3.2	3.2	3.2	3.2	1.5	1.5	3.2	3.2	4.2	4.2	3.2	3.2	3.2	4.2	3.2			774	P15379	30316353	12505	Cd44	P15379
518	CD48 antigen OS=Mus musculus GN=Cd48 PE=1 SV=1	CD48 antigen OS=Mus musculus GN=Cd48 PE=1 SV=1	DQHVDYTWYESSGPFPK-TIFESEFK-VYLEENNGALHISNVR	3	3	3	>sp|P18181|CD48_MOUSE CD48 antigen OS=Mus musculus GN=Cd48 PE=1 SV=1	1	3	3	3	17.1	17.1	17.1	27.383	240	8.8287	6.7	10.4	13.8	10.4	6.7	3.3	13.8	10	17.1	6.7	6.7	17.1	10	6.7	13.8	6.7	0	10	10	10.4	7.1	13.8	6.7	10				P18181	114872	12506	Cd48	P18181
519	CD81 antigen OS=Mus musculus GN=Cd81 PE=1 SV=2	CD81 antigen OS=Mus musculus GN=Cd81 PE=1 SV=2	QFYDQALQQAVMDDDANNAK-TFHETLNCCGSNALTTLTTTILR	2	2	2	>sp|P35762|CD81_MOUSE CD81 antigen OS=Mus musculus GN=Cd81 PE=1 SV=2	1	2	2	2	18.2	18.2	18.2	25.814	236	16.133	8.5	0	0	18.2	0	8.5	18.2	0	9.7	0	0	8.5	8.5	0	0	18.2	0	9.7	0	18.2	0	0	8.5	0		156;157		P35762	408360007	12520	Cd81	P35762
520	CD9 antigen OS=Mus musculus GN=Cd9 PE=1 SV=2	CD9 antigen OS=Mus musculus GN=Cd9 PE=1 SV=2	ELQEFYK-ELQEFYKDTYQK	2	2	2	>sp|P40240|CD9_MOUSE CD9 antigen OS=Mus musculus GN=Cd9 PE=1 SV=2	1	2	2	2	5.3	5.3	5.3	25.258	226	6.428	3.1	5.3	5.3	5.3	5.3	5.3	3.1	3.1	5.3	5.3	3.1	5.3	5.3	5.3	5.3	3.1	3.1	5.3	5.3	5.3	3.1	5.3	5.3	5.3				P40240	729087	12527	Cd9	P40240
521	CD97 antigen OS=Mus musculus GN=Cd97 PE=1 SV=2	CD97 antigen OS=Mus musculus GN=Cd97 PE=1 SV=2	ASLEDFYGSPIPSVSLK-FDFTSVESIEPR-FSVEVQNLLR-LLGNTPLNLEQR-TLAQFLPK	5	5	5	>sp|Q9Z0M6|CD97_MOUSE CD97 antigen OS=Mus musculus GN=Cd97 PE=1 SV=2	1	5	5	5	7.2	7.2	7.2	90.412	818	19.331	4.8	2.1	3.3	2.1	5.7	6.2	5.7	4.8	2.1	3.3	1.2	4.8	4.8	3.5	0	3.3	4.8	4.8	4.8	2.1	4.8	3.3	5	3.3				Q9Z0M6	42558906	26364	Cd97	Q9Z0M6
523	CDGSH iron-sulfur domain-containing protein 2 OS=Mus musculus GN=Cisd2 PE=1 SV=1	CDGSH iron-sulfur domain-containing protein 2 OS=Mus musculus GN=Cisd2 PE=1 SV=1	DSLINLK-HNELTGDNVGPLILK-QLPVPDSITGFAR-VQLPAYLK-VVNEINIEDLCLTK	5	5	5	>sp|Q9CQB5|CISD2_MOUSE CDGSH iron-sulfur domain-containing protein 2 OS=Mus musculus GN=Cisd2 PE=1 SV=1	1	5	5	5	42.2	42.2	42.2	15.242	135	14.451	36.3	25.9	36.3	25.9	20.7	31.9	9.6	36.3	31.9	20.7	20.7	31.9	31.1	20.7	15.6	42.2	20.7	25.9	36.3	36.3	20.7	20.7	9.6	25.9		92		Q9CQB5	81903539	67006	Cisd2	Q9CQB5
524	CDK5 regulatory subunit-associated protein 3 OS=Mus musculus GN=Cdk5rap3 PE=2 SV=1	CDK5 regulatory subunit-associated protein 3 OS=Mus musculus GN=Cdk5rap3 PE=2 SV=1	GSDALTLLEYPETR-LDLLLEK-QQEALQEQAALEPK-QYGITGDNVR	4	4	4	>sp|Q99LM2|CK5P3_MOUSE CDK5 regulatory subunit-associated protein 3 OS=Mus musculus GN=Cdk5rap3 PE=2 SV=1	1	4	4	4	8.9	8.9	8.9	56.99	503	7.5628	4.2	4.2	0	2.8	1.4	2.8	4.2	4.2	4.2	4.2	0	1.4	2.8	4.2	2.8	2.8	4.2	2.8	7	4.8	1.4	1.4	4.2	0				Q99LM2	32129447	80280	Cdk5rap3	Q99LM2
526	Cell cycle and apoptosis regulator protein 2 OS=Mus musculus GN=Ccar2 PE=1 SV=2	Cell cycle and apoptosis regulator protein 2 OS=Mus musculus GN=Ccar2 PE=1 SV=2	AAYNPGQAVPWNAVK-AEVLDDGLPEDVLFGNLDLLPPSGK-ATEAAPQPHEASGEAEATEQAPDVSEQADTSK-EAAPDTGAEPSPEDSDPTYSSK-FAEFQYLQPGPPR-FSATEVTNK-INPLPGGR-KEEEAVLVGGEWSPSLDGLDPQADPQVLVR-LAEAEETAR-NFSGAASTSLLGPPPGLLTPPVATDLSQNAR-QGILGAQPQLIFQPHR-SPAPPLLHVAALGQK-TLLSLPEK-VLLLSSPGLEEFYR-VLLTLGIR-VQTLSNQPLLK	16	16	16	>sp|Q8VDP4|CCAR2_MOUSE Cell cycle and apoptosis regulator protein 2 OS=Mus musculus GN=Ccar2 PE=1 SV=2	1	16	16	16	28.9	28.9	28.9	103	922	36.676	24.8	17.5	16.2	15.7	17.6	11.1	25.4	23.2	15.6	5.5	21.9	8.1	9.2	1.2	6.8	6.8	4.9	1.4	5	20.3	9.3	9.5	20.9	12.3				Q8VDP4	81901979	219158	Ccar2	Q8VDP4
527	Cell differentiation protein RCD1 homolog OS=Mus musculus GN=Rqcd1 PE=1 SV=1	Cell differentiation protein RCD1 homolog OS=Mus musculus GN=Rqcd1 PE=1 SV=1	ENALLELSK-IYQWINELSSPETR-LTSLGVIGALVK-TVATFILQK-WLAQLVK	5	5	5	>sp|Q9JKY0|RCD1_MOUSE Cell differentiation protein RCD1 homolog OS=Mus musculus GN=Rqcd1 PE=1 SV=1	1	5	5	5	17.1	17.1	17.1	33.601	299	6.3877	14	9.4	14	7	9.4	11.7	0	14	10	7	7	14	8.7	8.7	12.4	9.4	9.4	7	7	9.4	7	6.4	6.4	7				Q9JKY0	81917542	58184	Rqcd1	Q9JKY0
528	Cell division control protein 42 homolog OS=Mus musculus GN=Cdc42 PE=1 SV=2; Rho-related GTP-binding protein RhoQ OS=Mus musculus GN=Rhoq PE=1 SV=2; Rho-related GTP-binding protein RhoJ OS=Mus musculus GN=Rhoj PE=1 SV=2	Cell division control protein 42 homolog OS=Mus musculus GN=Cdc42 PE=1 SV=2	NVFDEAILAALEPPEPK-QKPITPETAEK-TCLLISYTTNK-TPFLLVGTQIDLR-TPFLLVGTQIDLRDDPSTIEK-YVECSALTQK	7;1;1	6;0;0	6;0;0	>sp|P60766|CDC42_MOUSE Cell division control protein 42 homolog OS=Mus musculus GN=Cdc42 PE=1 SV=2	3	7	6	6	42.4	36.6	36.6	21.258	191	266.66	42.4	30.9	42.4	36.6	20.4	42.4	36.6	42.4	42.4	36.6	36.6	36.6	31.4	37.2	42.4	36.6	29.3	42.4	42.4	42.4	36.6	42.4	30.9	36.6		6;18;157		P60766	322510016	12540	Cdc42	P60766
529	Cell division cycle 5-like protein OS=Mus musculus GN=Cdc5l PE=1 SV=2	Cell division cycle 5-like protein OS=Mus musculus GN=Cdc5l PE=1 SV=2	DLPRPSEVNETILRPLNVEPPLTDLQK-GGLNTPLHESDFSGVTPQR-LGLLGLPAPK-NTEDEILK-QTAEESGITNSASSTLLSEYNVTNNSIALR-QVVQTPNTVLSTPFR	6	6	6	>sp|Q6A068|CDC5L_MOUSE Cell division cycle 5-like protein OS=Mus musculus GN=Cdc5l PE=1 SV=2	1	6	6	6	13.6	13.6	13.6	92.188	802	8.3486	7	3.1	5.5	5.7	8.9	7.6	5.5	8.9	2.4	8.9	0	9.9	7	2.4	7.1	8	7	4.6	3.1	8	1.2	5.6	7	5.5				Q6A068	73619937	71702	Cdc5l	Q6A068
530	Cell division cycle and apoptosis regulator protein 1 OS=Mus musculus GN=Ccar1 PE=1 SV=1	Cell division cycle and apoptosis regulator protein 1 OS=Mus musculus GN=Ccar1 PE=1 SV=1	IQTLPNQNQSQTQPLLK-LHDTFGFVDEDVFFQLGAVK-LLLPTPTIK-VFTGVVTK-YILPDEPAIIVHPNWAAK-YTVQFSK	6	6	6	>sp|Q8CH18|CCAR1_MOUSE Cell division cycle and apoptosis regulator protein 1 OS=Mus musculus GN=Ccar1 PE=1 SV=1	1	6	6	6	6.9	6.9	6.9	132.06	1146	14.211	6.3	2.4	3.3	2.4	3.8	1.6	4.8	4.7	1.6	0.8	3.8	3.8	2.3	0.8	3.3	2.4	1.5	2.4	1.6	4.1	3.1	0.8	2.4	2.4				Q8CH18	81866361	67500	Ccar1	Q8CH18
531	Cell division cycle protein 23 homolog OS=Mus musculus GN=Cdc23 PE=1 SV=2	Cell division cycle protein 23 homolog OS=Mus musculus GN=Cdc23 PE=1 SV=2	ALSIFNELR-QLLLIAGLTR	2	2	2	>sp|Q8BGZ4|CDC23_MOUSE Cell division cycle protein 23 homolog OS=Mus musculus GN=Cdc23 PE=1 SV=2	1	2	2	2	3.2	3.2	3.2	68.561	597	2.7215	3.2	1.5	0	1.7	1.5	1.7	3.2	1.7	1.7	3.2	0	3.2	3.2	0	0	3.2	3.2	1.5	1.7	3.2	1.5	3.2	1.7	1.7				Q8BGZ4	37537784	52563	Cdc23	Q8BGZ4
532	Cell surface glycoprotein MUC18 OS=Mus musculus GN=Mcam PE=1 SV=1	Cell surface glycoprotein MUC18 OS=Mus musculus GN=Mcam PE=1 SV=1	APEEPTIQANVVGIHVDR-EVTVPVFYPAEK-NGYPIPQVLWYK-VWVEVEPVGLLK	4	4	4	>sp|Q8R2Y2|MUC18_MOUSE Cell surface glycoprotein MUC18 OS=Mus musculus GN=Mcam PE=1 SV=1	1	4	4	4	8.3	8.3	8.3	71.545	648	5.7157	4.6	1.9	3.7	0	3.7	1.9	1.9	3.7	1.9	1.9	1.9	3.7	1.9	0	0	3.7	1.9	1.9	1.9	1.9	1.9	1.9	3.7	3.7				Q8R2Y2	81915013	84004	Mcam	Q8R2Y2
533	Cellular nucleic acid-binding protein OS=Mus musculus GN=Cnbp PE=1 SV=2	Cellular nucleic acid-binding protein OS=Mus musculus GN=Cnbp PE=1 SV=2	CGETGHVAINCSK-CYSCGEFGHIQK-ECTIEATA-EQCCYNCGKPGHLAR-GFQFVSSSLPDICYR-TSEVNCYR	6	6	6	>sp|P53996|CNBP_MOUSE Cellular nucleic acid-binding protein OS=Mus musculus GN=Cnbp PE=1 SV=2	1	6	6	6	39.9	39.9	39.9	19.592	178	58.786	20.2	4.5	15.7	31.5	12.9	24.7	17.4	11.8	24.7	12.9	12.9	16.3	35.4	28.1	9	16.9	22.5	12.9	15.7	39.9	33.1	24.2	12.9	11.8		54;98;99;102;120;123;141;151;159;172		P53996	50403746	12785	Cnbp	P53996
534	Centriolin OS=Mus musculus GN=Cntrl PE=2 SV=2	Centriolin OS=Mus musculus GN=Cntrl PE=2 SV=2	DLEGVISGLQEYLGTIK-QFSEILAR-TVETEELK	3	3	3	>sp|A2AL36|CNTRL_MOUSE Centriolin OS=Mus musculus GN=Cntrl PE=2 SV=2	1	3	3	3	1.4	1.4	1.4	268.88	2334	2.3903	0	0.7	0.7	0	0	0	0	0.7	0	0.3	0	0	0.3	0	0.7	0.7	0	0.3	0	0	0	0	0	0				A2AL36	171769754	26920	Cntrl	A2AL36
535	Centrosomal protein of 164 kDa OS=Mus musculus GN=Cep164 PE=2 SV=2	Centrosomal protein of 164 kDa OS=Mus musculus GN=Cep164 PE=2 SV=2	TDGVSIQSLIDSNR-VQLFSSAPK	2	2	2	>sp|Q5DU05|CE164_MOUSE Centrosomal protein of 164 kDa OS=Mus musculus GN=Cep164 PE=2 SV=2	1	2	2	2	1.6	1.6	1.6	162.6	1446	2.7853	0	0	0	0	0.6	0.6	0	0	0.6	0	1.6	0	0.6	0	0	0.6	0	0.6	0	0	0	1	0	0				Q5DU05	229553938	---	Cep164	Q5DU05
536	Centrosomal protein of 290 kDa OS=Mus musculus GN=Cep290 PE=1 SV=2	Centrosomal protein of 290 kDa OS=Mus musculus GN=Cep290 PE=1 SV=2	AQVDQLTGRNEELR-INDILDENEALR-INLDAQK-LLISLSK-TLELELK	5	5	5	>sp|Q6A078|CE290_MOUSE Centrosomal protein of 290 kDa OS=Mus musculus GN=Cep290 PE=1 SV=2	1	5	5	5	1.9	1.9	1.9	289.07	2472	2.6045	0.5	0.3	0.3	0.3	0	0	0.3	0.6	0.8	0.5	0	0	0	0	0.3	0.8	0.3	0	0.3	0.3	0	0	0	0				Q6A078	118595720	216274	Cep290	Q6A078
537	Ceruloplasmin OS=Mus musculus GN=Cp PE=1 SV=2	Ceruloplasmin OS=Mus musculus GN=Cp PE=1 SV=2	AGLQAFFQVR-ALYFEYTDGTFSK-DCNKPSPEDNIQDR-DIASGLIGPLILCK-DLYSGLIGPLIVCR-DVDKEFYLFPTVFDENESLLLDDNIR-ETFTYEWTVPK-EYTDGSFTNR-GPDEEHLGILGPVIWAEVGDTIK-GSLLADGR-KLISVDTEQSNFYLQNGPDR-LISVDTEQSNFYLQNGPDR-QFEDFTVYLGER-QFTDSSFR-RAEDEHLGILGPPIHANVGDK-TESSTVVPTLPGEVR-TIDKPAWLGFLGPVIK-VFFEQGATR-YTVNQCQR	19	19	19	>sp|Q61147|CERU_MOUSE Ceruloplasmin OS=Mus musculus GN=Cp PE=1 SV=2	1	19	19	19	23.8	23.8	23.8	121.15	1061	92.12	14.8	9.3	10.7	10.7	6.2	12.1	10.2	13.3	10.4	15.2	12.8	11.6	10.7	7.4	9.8	18.5	5.7	10.5	13.4	16.7	3.6	13.8	15.3	14.9		199;356;713;895		Q61147	161784289	12870	Cp	Q61147
538	CGG triplet repeat-binding protein 1 OS=Mus musculus GN=Cggbp1 PE=2 SV=1	CGG triplet repeat-binding protein 1 OS=Mus musculus GN=Cggbp1 PE=2 SV=1	ASVIQDFVK-TALYVTPLDR	2	2	2	>sp|Q8BHG9|CGBP1_MOUSE CGG triplet repeat-binding protein 1 OS=Mus musculus GN=Cggbp1 PE=2 SV=1	1	2	2	2	11.4	11.4	11.4	18.761	167	3.4236	11.4	11.4	6	0	11.4	11.4	11.4	11.4	11.4	5.4	11.4	11.4	0	0	0	0	6	5.4	6	11.4	6	0	6	11.4				Q8BHG9	81873784	106143	Cggbp1	Q8BHG9
539	cGMP-dependent 3',5'-cyclic phosphodiesterase OS=Mus musculus GN=Pde2a PE=1 SV=3	cGMP-dependent 3',5'-cyclic phosphodiesterase OS=Mus musculus GN=Pde2a PE=1 SV=3	EFFSQGDLEK-GLPSNNSLDFLDEEYEVPDLDGTR-IPADQGIAGHVATTGQILNIPDAYAHPLFYR-LLHDGIQPVAAIDSNFANFTYTPR	4	4	4	>sp|Q922S4|PDE2A_MOUSE cGMP-dependent 3,5-cyclic phosphodiesterase OS=Mus musculus GN=Pde2a PE=1 SV=3	1	4	4	4	9.7	9.7	9.7	103.25	916	7.8725	3.4	0	2.6	6	2.6	2.6	6	2.6	0	2.6	0	2.6	2.6	2.6	3.4	0	0	2.6	2.6	2.6	2.6	4.5	6	0				Q922S4	341942204	---	Pde2a	Q922S4
540	cGMP-dependent protein kinase 1 OS=Mus musculus GN=Prkg1 PE=1 SV=1	cGMP-dependent protein kinase 1 OS=Mus musculus GN=Prkg1 PE=1 SV=1	LSDFNIIDTLGVGGFGR-VELVQLK	2	2	2	>sp|P0C605|KGP1_MOUSE cGMP-dependent protein kinase 1 OS=Mus musculus GN=Prkg1 PE=1 SV=1	1	2	2	2	3.6	3.6	3.6	76.35	671	3.2256	2.5	0	0	0	0	2.5	0	0	0	2.5	0	3.6	2.5	0	0	0	2.5	0	2.5	2.5	0	2.5	2.5	2.5				P0C605	166220481	19091	Prkg1	P0C605
541	Charged multivesicular body protein 1b-1 OS=Mus musculus GN=Chmp1b1 PE=1 SV=1	Charged multivesicular body protein 1b-1 OS=Mus musculus GN=Chmp1b1 PE=1 SV=1	NQGVNFLR	2	1	1	>sp|Q99LU0|CH1B1_MOUSE Charged multivesicular body protein 1b-1 OS=Mus musculus GN=Chmp1b1 PE=1 SV=1	1	2	1	1	8.5	4	4	22.124	199	2.8959	0	4	4.5	8.5	4	4	0	4	0	4	4	4	4	4	0	0	4	0	4	4	4	4	4	4			85	Q99LU0	73917726	67064	Chmp1b1	Q99LU0
542	Charged multivesicular body protein 1b-2 OS=Mus musculus GN=Chmp1b2 PE=2 SV=2	Charged multivesicular body protein 1b-2 OS=Mus musculus GN=Chmp1b2 PE=2 SV=2	NQAINFLR-VQTAVTMGK	2	2	1	>sp|Q9CQD4|CH1B2_MOUSE Charged multivesicular body protein 1b-2 OS=Mus musculus GN=Chmp1b2 PE=2 SV=2	1	2	2	1	8.5	8.5	4	22.161	199	3.0961	4	4	8.5	8.5	4	4	0	4	4	4	4	4	4	4	0	0	4	0	4	4	4	4	4	4			85	Q9CQD4	73917727	67028	Chmp1b2	Q9CQD4
543	Charged multivesicular body protein 4b OS=Mus musculus GN=Chmp4b PE=1 SV=2	Charged multivesicular body protein 4b OS=Mus musculus GN=Chmp4b PE=1 SV=2	EALENANTNTEVLK-GGPTPQEAIQR-QLAQIDGTLSTIEFQR	3	3	3	>sp|Q9D8B3|CHM4B_MOUSE Charged multivesicular body protein 4b OS=Mus musculus GN=Chmp4b PE=1 SV=2	1	3	3	3	18.3	18.3	18.3	24.936	224	8.8027	18.3	18.3	11.2	11.2	11.2	11.2	4.9	4.9	11.2	12.1	11.2	18.3	7.1	0	4.9	4.9	13.4	0	11.2	11.2	7.1	18.3	18.3	11.2				Q9D8B3	24636295	75608	Chmp4b	Q9D8B3
545	Chitinase-3-like protein 1 OS=Mus musculus GN=Chi3l1 PE=1 SV=3	Chitinase-3-like protein 1 OS=Mus musculus GN=Chi3l1 PE=1 SV=3	EFFPLTNAIK-ELNAEFTK-FSEIASNTER-LLLSAALSAGK-SFTLASSENQLGAPISGEGLPGR-SYGFDGLDLAWLYPR-TLLSVGGWK	7	7	7	>sp|Q61362|CH3L1_MOUSE Chitinase-3-like protein 1 OS=Mus musculus GN=Chi3l1 PE=1 SV=3	1	7	7	7	22.1	22.1	22.1	43.893	389	13.147	0	12.9	8.5	10.5	0	8	10.5	0	8	10.5	8.2	15.9	5.9	0	0	0	0	0	8.5	8	0	4.6	2.6	2.1				Q61362	635377452	12654	Chi3l1	Q61362
546	Chitinase-like protein 3 OS=Mus musculus GN=Chil3 PE=1 SV=2	Chitinase-like protein 3 OS=Mus musculus GN=Chil3 PE=1 SV=2	AFEEESVEK-AFEEESVEKDIPR-DGYTGENSPLYK-DNNLGGAVVWPLDMDDFSGSFCHQR-DYEALNGLKDK-FGPAPFSAMVSTPQNR-HFPLTSTLK-HLFSVLVK-IPELSQSLDYIQVMTYDLHDPKDGYTGENSPLYK-LLLTSTGAGIIDVIK-QIFIQSVIR-QIFIQSVIRFLR-SADLNVDSIISYWK-TGIGAPTISTGPPGK-DYEALNGLK-IPELSQSLDYIQVMTYDLHDPK-LIVGFPAYGHTFILSDPSK-QYNFDGLNLDWQYPGSR-SGYKIPELSQSLDYIQVMTYDLHDPK-SPYDIGK-TLLAIGGWK	21	21	14	>sp|O35744|CHIL3_MOUSE Chitinase-like protein 3 OS=Mus musculus GN=Chil3 PE=1 SV=2	1	21	21	14	57.3	57.3	43.2	44.458	398	323.31	39.4	44.5	52	52	31.7	43	41	45.7	41.2	40.7	46	47.2	46.7	47.2	41.2	46	45	56.5	49.5	57.3	49.5	57.3	53.5	51.3		372	109;210;364	O35744	51315803	12655	Chil3	O35744
547	Chitinase-like protein 4 OS=Mus musculus GN=Chil4 PE=1 SV=2	Chitinase-like protein 4 OS=Mus musculus GN=Chil4 PE=1 SV=2	FGPAPFSSMVSTPQNR	8	1	1	>sp|Q91Z98|CHIL4_MOUSE Chitinase-like protein 4 OS=Mus musculus GN=Chil4 PE=1 SV=2	1	8	1	1	25.6	4	4	44.974	402	323.31	20.6	19.2	24.6	22.9	19.2	22.9	22.9	17.4	19.2	17.4	23.9	24.6	24.6	24.6	19.2	23.9	24.6	25.6	24.6	25.6	24.6	25.6	24.6	24.6			210	Q91Z98	51316058	104183	Chil4	Q91Z98
548	Chloride intracellular channel protein 1 OS=Mus musculus GN=Clic1 PE=1 SV=3	Chloride intracellular channel protein 1 OS=Mus musculus GN=Clic1 PE=1 SV=3	EEFASTCPDDEEIELAYEQVAR-FLDGNELTLADCNLLPK-GFTIPEAFR-GVTFNVTTVDTK-IGNCPFSQR-KFLDGNELTLADCNLLPK-LAALNPESNTSGLDIFAK-LFMVLWLK-NSNPALNDNLEK-VLDNYLTSPLPEEVDETSAEDEGISQR-VLDNYLTSPLPEEVDETSAEDEGISQRK-YLSNAYAR-YRGFTIPEAFR	13	13	13	>sp|Q9Z1Q5|CLIC1_MOUSE Chloride intracellular channel protein 1 OS=Mus musculus GN=Clic1 PE=1 SV=3	1	13	13	13	60.2	60.2	60.2	27.013	241	323.31	55.2	27.8	50.2	60.2	59.3	60.2	37.8	47.7	55.6	60.2	52.3	60.2	51	56.4	59.3	60.2	56.8	51	59.3	56.8	59.3	60.2	56	50.2		24;178;223	32	Q9Z1Q5	6685328	114584	Clic1	Q9Z1Q5
549	Chloride intracellular channel protein 4 OS=Mus musculus GN=Clic4 PE=1 SV=3; Chloride intracellular channel protein 6 OS=Mus musculus GN=Clic6 PE=2 SV=1	Chloride intracellular channel protein 4 OS=Mus musculus GN=Clic4 PE=1 SV=3	AGSDGESIGNCPFSQR-DEFTNTCPSDKEVEIAYSDVAK-FLDGDEMTLADCNLLPK-GMTGIWR-GVVFSVTTVDLK-HPESNTAGMDIFAK-KPADLQNLAPGTHPPFITFNSEVK-LDEYLNSPLPDEIDENSMEDIK-NSRPEANEALER-RKPADLQNLAPGTHPPFITFNSEVK-TDVNKIEEFLEEVLCPPK-YLTNAYSR-LFMILWLK	13;1	13;1	12;0	>sp|Q9QYB1|CLIC4_MOUSE Chloride intracellular channel protein 4 OS=Mus musculus GN=Clic4 PE=1 SV=3	2	13	13	12	71.5	71.5	68.4	28.729	253	178.76	59.3	20.2	36.4	49	22.5	49.8	4.7	43.9	55.7	47.8	34	40.3	25.3	40.3	31.6	56.1	32	31.6	33.6	56.1	30.8	39.1	47.4	43.9		35;100;189;234	43;119;168;184;214	Q9QYB1	24211558	29876	Clic4	Q9QYB1
550	Chloride intracellular channel protein 5 OS=Mus musculus GN=Clic5 PE=1 SV=1	Chloride intracellular channel protein 5 OS=Mus musculus GN=Clic5 PE=1 SV=1	GVVFNVTTVDLK-KLDDYLNSPLPEEIDTNTHGDEK	3	2	2	>sp|Q8BXK9|CLIC5_MOUSE Chloride intracellular channel protein 5 OS=Mus musculus GN=Clic5 PE=1 SV=1	1	3	2	2	17.1	13.9	13.9	28.287	251	6.8449	17.1	4.8	13.9	17.1	17.1	13.9	0	17.1	17.1	17.1	12.4	17.1	17.1	17.1	0	12.4	13.9	13.9	9.2	17.1	17.1	17.1	17.1	17.1			40	Q8BXK9	46395845	224796	Clic5	Q8BXK9
551	Choline transporter-like protein 2 OS=Mus musculus GN=Slc44a2 PE=1 SV=2	Choline transporter-like protein 2 OS=Mus musculus GN=Slc44a2 PE=1 SV=2	GVTEILR-NADKPFLFYFNIVK-NITDLVEGAKK-VIYPTDSR-YLTLLSAR	5	5	5	>sp|Q8BY89|CTL2_MOUSE Choline transporter-like protein 2 OS=Mus musculus GN=Slc44a2 PE=1 SV=2	1	5	5	5	6.8	6.8	6.8	80.109	706	6.4644	1.1	5.2	3.7	5.2	5.7	3.8	5.7	6.8	4.1	4.1	2.1	6.8	3.3	0	1	4.1	1.1	3.1	2.1	1	5.8	3.7	5.7	4.1				Q8BY89	347595649	68682	Slc44a2	Q8BY89
552	Choline-phosphate cytidylyltransferase A OS=Mus musculus GN=Pcyt1a PE=1 SV=1	Choline-phosphate cytidylyltransferase A OS=Mus musculus GN=Pcyt1a PE=1 SV=1	NAPWTLTPEFLAEHR-QPAPFSDEIEVDFSKPYVR-ELNVSFINEK-IDFVAHDDIPYSSAGSDDVYK-TEGISTSDIITR	5	5	2	>sp|P49586|PCY1A_MOUSE Choline-phosphate cytidylyltransferase A OS=Mus musculus GN=Pcyt1a PE=1 SV=1	1	5	5	2	21	21	9.3	41.666	367	12.688	8.4	5.7	4.1	17.7	6	15.8	2.7	9.8	4.1	9.8	11.7	8.4	8.4	0	0	21	0	9.8	2.7	21	2.7	12.5	12.5	2.7				P49586	1345856	13026	Pcyt1a	P49586
553	Choline-phosphate cytidylyltransferase B OS=Mus musculus GN=Pcyt1b PE=1 SV=2	Choline-phosphate cytidylyltransferase B OS=Mus musculus GN=Pcyt1b PE=1 SV=2	SHDLIQKWEEK	4	1	1	>sp|Q811Q9|PCY1B_MOUSE Choline-phosphate cytidylyltransferase B OS=Mus musculus GN=Pcyt1b PE=1 SV=2	1	4	1	1	14.6	3	3	41.9	369	10.31	8.4	5.7	0	11.4	6	11.7	2.7	5.7	0	5.7	11.7	8.4	8.4	0	0	11.7	0	5.7	2.7	11.7	2.7	8.4	8.4	2.7				Q811Q9	110815906	236899	Pcyt1b	Q811Q9
554	Chromatin complexes subunit BAP18 OS=Mus musculus GN=Bap18 PE=1 SV=1	Chromatin complexes subunit BAP18 OS=Mus musculus GN=Bap18 PE=1 SV=1	VGEIFSAAGAAFTK-VYEDSGIPLPAESPK	2	2	2	>sp|Q9DCT6|BAP18_MOUSE Chromatin complexes subunit BAP18 OS=Mus musculus GN=Bap18 PE=1 SV=1	1	2	2	2	17	17	17	17.996	171	3.6309	8.2	8.8	8.8	8.2	8.8	17	17	8.8	8.2	17	8.8	17	8.8	8.2	0	8.2	8.8	17	8.2	17	17	8.8	8.2	8.2				Q9DCT6	81917220	104457	Bap18	Q9DCT6
555	Chromobox protein homolog 1 OS=Mus musculus GN=Cbx1 PE=1 SV=1	Chromobox protein homolog 1 OS=Mus musculus GN=Cbx1 PE=1 SV=1	CPQVVISFYEER-KVEEVLEEEEEEYVVEK-NSDEADLVPAK-VEEVLEEEEEEYVVEK	5	4	4	>sp|P83917|CBX1_MOUSE Chromobox protein homolog 1 OS=Mus musculus GN=Cbx1 PE=1 SV=1	1	5	4	4	30.3	21.6	21.6	21.418	185	58.634	21.6	5.9	15.1	21.6	15.1	15.1	0	15.1	30.3	15.1	12.4	21.6	5.9	12.4	5.9	15.1	15.1	5.9	0	21.6	15.1	15.1	15.1	12.4		156	133;136	P83917	48428809	12412	Cbx1	P83917
556	Chromobox protein homolog 3 OS=Mus musculus GN=Cbx3 PE=1 SV=2	Chromobox protein homolog 3 OS=Mus musculus GN=Cbx3 PE=1 SV=2	IIGATDSSGELMFLMK-DSDEADLVLAK-EANMKCPQIVIAFYEER-KVEEAEPEEFVVEK-LTWHSCPEDEAQ-VEEAEPEEFVVEK-WKDSDEADLVLAK-CPQIVIAFYEER	8	8	6	>sp|P23198|CBX3_MOUSE Chromobox protein homolog 3 OS=Mus musculus GN=Cbx3 PE=1 SV=2	1	8	8	6	39.3	39.3	30.6	20.855	183	116.7	27.9	14.8	14.8	20.2	21.3	20.2	26.8	21.3	30.1	21.3	23	13.7	24	14.8	21.3	27.9	20.2	21.3	21.3	27.9	21.3	23.5	27.9	14.8		160;177	137;140	P23198	21903394	---	Cbx3	P23198
557	Chromobox protein homolog 5 OS=Mus musculus GN=Cbx5 PE=1 SV=1	Chromobox protein homolog 5 OS=Mus musculus GN=Cbx5 PE=1 SV=1	SSFSNSADDIK-WKDTDEADLVLAK	3	2	2	>sp|Q61686|CBX5_MOUSE Chromobox protein homolog 5 OS=Mus musculus GN=Cbx5 PE=1 SV=1	1	3	2	2	18.8	12.6	12.6	22.186	191	23.377	18.8	5.8	5.8	12	0	5.8	18.8	6.8	5.8	12.6	12.6	5.8	5.8	5.8	0	12	12.6	13.1	18.8	18.8	12	12	13.1	5.8		160		Q61686	2493705	12419	Cbx5	Q61686
558	Chromodomain-helicase-DNA-binding protein 4 OS=Mus musculus GN=Chd4 PE=1 SV=1; Chromodomain-helicase-DNA-binding protein 5 OS=Mus musculus GN=Chd5 PE=1 SV=1	Chromodomain-helicase-DNA-binding protein 4 OS=Mus musculus GN=Chd4 PE=1 SV=1	GPFLVSAPLSTIINWER-QLEELLSDMK-TVQTAVFLYSLYK-QELDDILK-VGGNIEVLGFNAR	5;2	5;2	5;2	>sp|Q6PDQ2|CHD4_MOUSE Chromodomain-helicase-DNA-binding protein 4 OS=Mus musculus GN=Chd4 PE=1 SV=1	2	5	5	5	3.2	3.2	3.2	217.75	1915	5.5156	0.7	1.4	2.1	1.8	1.6	2.3	2	2.7	2.2	1.1	2.7	1.1	1.1	0.7	0.7	2.7	0.4	0.7	0.7	1.6	1.4	0.7	2.7	2				Q6PDQ2	51701319	107932	Chd4	Q6PDQ2
559	Chymase OS=Mus musculus GN=Cma1 PE=1 SV=2	Chymase OS=Mus musculus GN=Cma1 PE=1 SV=2	AKLTLGVGTLPLSANFNFIPPGR-EDTWQKLEVEK-GDSGGPLLCAGIAQGIASYVHR-HNSQLCVGNPK-LQEPQACK-LTLGVGTLPLSANFNFIPPGR-MQNVYKGDSGGPLLCAGIAQGIASYVHR-NAKPPAVFTR-NFVLTAAHCAGR-TNVNEPASDTLQEVK-YDENLVVHDIMLLK	11	11	11	>sp|P21844|CMA1_MOUSE Chymase OS=Mus musculus GN=Cma1 PE=1 SV=2	1	11	11	11	53.4	53.4	53.4	27.586	247	323.31	0	0	0	0	0	6.1	0	0	0	0	0	0	0	20.6	0	29.1	6.1	53.4	20.6	38.9	10.9	0	23.5	6.1		67;175;188;209	112;195	P21844	126838	17228	Cma1	P21844
560	Chymotrypsin-like elastase family member 1 OS=Mus musculus GN=Cela1 PE=2 SV=1	Chymotrypsin-like elastase family member 1 OS=Mus musculus GN=Cela1 PE=2 SV=1	EGTILANNSPCYITGWGR-IVSHPYWNK-NNVVAGYDIALLR-NTMVCAGGDGVR-SVTLNNYVQLGVLPR-VSAYISWMNNVIASN-VVVGEHNLSQNDGTEQYVNVQK	7	7	7	>sp|Q91X79|CELA1_MOUSE Chymotrypsin-like elastase family member 1 OS=Mus musculus GN=Cela1 PE=2 SV=1	1	7	7	7	39.1	39.1	39.1	28.9	266	323.31	25.6	15	30.1	0	17.7	33.5	18.8	28.9	0	30.1	10.5	0	0	33.5	39.1	22.2	0	0	15	0	15	30.1	33.5	30.1		153;200	198	Q91X79	81916150	109901	Cela1	Q91X79
561	Chymotrypsin-like elastase family member 2A OS=Mus musculus GN=Cela2a PE=2 SV=1	Chymotrypsin-like elastase family member 2A OS=Mus musculus GN=Cela2a PE=2 SV=1	HNCGGSLVANNWVLTAAHCLSNYQTYR-LASPVTLSK-NIQTACLPPAGTILPR-NYVCYVTGWGLLQTNGNSPDTLR-VLLGAHSLSNPGAGSAAVQVSK-VSNYIDWINSVMAR-VVGGQEATPNTWPWQVSLQVLSSGR-WNSQNVGNGYDIALIK	8	8	8	>sp|P05208|CEL2A_MOUSE Chymotrypsin-like elastase family member 2A OS=Mus musculus GN=Cela2a PE=2 SV=1	1	8	8	8	56.1	56.1	56.1	28.913	271	323.31	26.6	15.1	32.5	0	22.5	56.1	14	47.6	0	56.1	56.1	0	0	37.6	56.1	40.2	0	0	28.4	0	25.8	23.2	47.6	46.1		60;76;143;157	268	P05208	119257	13706	Cela2a	P05208
562	Chymotrypsin-like elastase family member 3B OS=Mus musculus GN=Cela3b PE=2 SV=1	Chymotrypsin-like elastase family member 3B OS=Mus musculus GN=Cela3b PE=2 SV=1	DGSFHHTCGGSLITPDWVLTAGHCISTSR-GVEEGQEQVIPINAGDLFVHPK-LQQALLPVVDYEHCSR-LSTNGPLPDK-TYQVVLGEHER-VSAFIDWIEETIANN-VVNGEEAVPHSWPWQVSLQYEK-WNWWGLSVK	8	8	8	>sp|Q9CQ52|CEL3B_MOUSE Chymotrypsin-like elastase family member 3B OS=Mus musculus GN=Cela3b PE=2 SV=1	1	8	8	8	49.8	49.8	49.8	28.904	269	97.874	8.2	11.9	26	0	0	39	8.2	19.3	0	38.3	21.6	0	0	25.3	33.5	17.5	0	0	16	0	17.8	21.9	39	39		57;73;187		Q9CQ52	81916758	67868	Cela3b	Q9CQ52
563	Chymotrypsinogen B OS=Mus musculus GN=Ctrb1 PE=2 SV=1	Chymotrypsinogen B OS=Mus musculus GN=Ctrb1 PE=2 SV=1	FNSFTVR-IVNGEDAIPGSWPWQVSLQDR-LATPAQFSETVSAVCLPTVDDDFPAGTLCATTGWGK-LQQAALPIVSEAK-NDITLLK-TPDKLQQAALPIVSEAK-TTDVVVAGEFDQGSDEENVQVLK-VTALMPWVQEILEAN	8	8	8	>sp|Q9CR35|CTRB1_MOUSE Chymotrypsinogen B OS=Mus musculus GN=Ctrb1 PE=2 SV=1	1	8	8	8	47.9	47.9	47.9	27.822	263	323.31	19.8	11.8	28.5	0	20.5	47.9	23.2	19.8	0	34.2	34.2	8.7	0	28.5	25.5	39.2	0	0	11.8	0	17.1	19.8	47.9	34.2		140;154	253	Q9CR35	81916772	66473	Ctrb1	Q9CR35
564	Citrate lyase subunit beta-like protein, mitochondrial OS=Mus musculus GN=Clybl PE=1 SV=2	Citrate lyase subunit beta-like protein, mitochondrial OS=Mus musculus GN=Clybl PE=1 SV=2	INSVSSGLAEVDLETFLQAR-QVIHPNQIAVVQEQFTPTPEK	2	2	2	>sp|Q8R4N0|CLYBL_MOUSE Citrate lyase subunit beta-like protein, mitochondrial OS=Mus musculus GN=Clybl PE=1 SV=2	1	2	2	2	12.1	12.1	12.1	37.548	338	11.048	6.2	0	0	6.2	6.2	0	0	6.2	0	0	6.2	0	6.2	6.2	6.2	6.2	6.2	0	6.2	12.1	6.2	0	6.2	0				Q8R4N0	146286074	69634	Clybl	Q8R4N0
565	Citrate synthase, mitochondrial OS=Mus musculus GN=Cs PE=1 SV=1	Citrate synthase, mitochondrial OS=Mus musculus GN=Cs PE=1 SV=1	ALGFPLERPK-ALGVLAQLIWSR-DVLSNLIPK-DYIWNTLNSGR-EGSSIGAIDSR-GLVYETSVLDPDEGIR-GLVYETSVLDPDEGIRFR-GYSIPECQK-IVPNILLEQGK-LDWSHNFTNMLGYTDPQFTELMR-LRDYIWNTLNSGR-LVAQLYK-VVPGYGHAVLR	13	13	13	>sp|Q9CZU6|CISY_MOUSE Citrate synthase, mitochondrial OS=Mus musculus GN=Cs PE=1 SV=1	1	13	13	13	28.9	28.9	28.9	51.736	464	128.33	17	19	19	18.5	19.2	21.3	21.1	19	16.6	16.6	19	19	16.6	19	18.5	16.6	8.2	15.1	14.7	21.6	18.5	14.4	21.6	9.7		101		Q9CZU6	57012721	12974	Cs	Q9CZU6
566	C-Jun-amino-terminal kinase-interacting protein 4 OS=Mus musculus GN=Spag9 PE=1 SV=2	C-Jun-amino-terminal kinase-interacting protein 4 OS=Mus musculus GN=Spag9 PE=1 SV=2	ERPISLGIFPLPAGDGLLTPDTQK-EVENLILENTQLLETK-ITALMVSCNR-SSIWQFFSR	4	4	4	>sp|Q58A65|JIP4_MOUSE C-Jun-amino-terminal kinase-interacting protein 4 OS=Mus musculus GN=Spag9 PE=1 SV=2	1	4	4	4	4.5	4.5	4.5	146.22	1321	5.3226	1.2	3	3.7	3.7	3.7	0.7	1.2	1.9	1.8	0	3.7	1.2	1.2	0	1.2	1.2	0	0	1.9	2	1.9	1.2	3.7	3				Q58A65	94717649	70834	Spag9	Q58A65
567	Class II histocompatibility antigen, M beta 1 chain OS=Mus musculus GN=H2-DMb1 PE=2 SV=1	Class II histocompatibility antigen, M beta 1 chain OS=Mus musculus GN=H2-DMb1 PE=2 SV=1	GDWTPGLSPIQTVK-VAQTTPFNTR	2	2	2	>sp|P35737|DMB_MOUSE Class II histocompatibility antigen, M beta 1 chain OS=Mus musculus GN=H2-DMb1 PE=2 SV=1	1	2	2	2	9.2	9.2	9.2	28.899	261	7.0964	9.2	3.8	5.4	9.2	9.2	9.2	0	9.2	9.2	3.8	3.8	9.2	9.2	3.8	9.2	9.2	3.8	3.8	9.2	5.4	3.8	9.2	9.2	9.2				P35737	548810	---	H2-DMb1	P35737
568	Clathrin heavy chain 1 OS=Mus musculus GN=Cltc PE=1 SV=3	Clathrin heavy chain 1 OS=Mus musculus GN=Cltc PE=1 SV=3	ADDPSSYMEVVQAANASGNWEELVK-AFMTADLPNELIELLEK-ALEHFTDLYDIK-ALEHFTDLYDIKR-ARESYVETELIFALAK-AYEFAER-CNEPAVWSQLAK-DTELAEELLQWFLQEEK-DTELAEELLQWFLQEEKR-EAIDSYIK-ENPYYDSR-ESNCYDPER-ESYVETELIFALAK-EVCFACVDGK-FDVNTSAVQVLIEHIGNLDR-FNALFAQGNYSEAAK-FQSVPAQPGQTSPLLQYFGILLDQGQLNK-GQCDLELINVCNENSLFK-GQFSTDELVAEVEK-GQFSTDELVAEVEKR-HDVVFLITK-HSSLAGCQIINYR-IAAYLFK-ISGETIFVTAPHEATAGIIGVNR-ISGETIFVTAPHEATAGIIGVNRK-I…	65	65	65	>sp|Q68FD5|CLH1_MOUSE Clathrin heavy chain 1 OS=Mus musculus GN=Cltc PE=1 SV=3	1	65	65	65	48.5	48.5	48.5	191.55	1675	323.31	38.8	33.8	33	34.3	33.3	36.1	34.2	37.3	35	32.7	38.4	27.9	31.8	22.6	31.9	39.9	30.6	34.3	27.3	38	30	34.1	38.4	36.2		151;328;436;491;753;778;824;926;934;1102;1257;1260	55;73;95;181;996;1041;1138	Q68FD5	66773801	67300	Cltc	Q68FD5
569	Clathrin interactor 1 OS=Mus musculus GN=Clint1 PE=1 SV=2	Clathrin interactor 1 OS=Mus musculus GN=Clint1 PE=1 SV=2	ASPDQNASTHTPQSSAKPSVPSSK-IGSTIDDTISK-QDAFANFANFSK-SLLLLAYLIR	4	4	4	>sp|Q99KN9|EPN4_MOUSE Clathrin interactor 1 OS=Mus musculus GN=Clint1 PE=1 SV=2	1	4	4	4	9	9	9	68.512	631	4.9275	3.3	0	0	1.6	1.7	0	3.5	0	5.4	0	0	1.7	1.7	1.7	1.7	1.6	1.6	1.7	0	1.7	0	1.6	1.7	1.7				Q99KN9	41017053	---	Clint1	Q99KN9
570	Clathrin light chain A OS=Mus musculus GN=Clta PE=1 SV=2	Clathrin light chain A OS=Mus musculus GN=Clta PE=1 SV=2	ELEEWYAR-LEALDANSR-LQSEPESIRK-SVLISLK	4	4	4	>sp|O08585|CLCA_MOUSE Clathrin light chain A OS=Mus musculus GN=Clta PE=1 SV=2	1	4	4	4	14.5	14.5	14.5	25.604	235	4.4174	11.1	3.4	3	0	10.2	0	3.8	6.8	6.4	14.5	7.2	7.2	8.1	7.2	6.8	3	6.4	6.8	6.8	3.4	7.2	3	3	3				O08585	408360022	---	Clta	O08585
571	Cleavage and polyadenylation specificity factor subunit 1 OS=Mus musculus GN=Cpsf1 PE=1 SV=1	Cleavage and polyadenylation specificity factor subunit 1 OS=Mus musculus GN=Cpsf1 PE=1 SV=1	EVLLVALGSR-LVVLPFR-SSFLPSYIIDVR-YIVQVSPLGIR	4	4	4	>sp|Q9EPU4|CPSF1_MOUSE Cleavage and polyadenylation specificity factor subunit 1 OS=Mus musculus GN=Cpsf1 PE=1 SV=1	1	4	4	4	2.8	2.8	2.8	160.82	1441	6.2221	2.3	1.3	1.2	0.7	1.2	0.7	1.2	0.7	0	1.2	1.9	0.7	1.2	0	0	1.5	1.9	0.8	1.2	0.7	1.2	0.8	1.9	1.2				Q9EPU4	17374611	94230	Cpsf1	Q9EPU4
572	Cleavage and polyadenylation specificity factor subunit 2 OS=Mus musculus GN=Cpsf2 PE=1 SV=1	Cleavage and polyadenylation specificity factor subunit 2 OS=Mus musculus GN=Cpsf2 PE=1 SV=1	DEQLLTNVLETLR-FLIDNPTEK-FSQIVNLK-GDGNVLIAVDTAGR-VLELAQLLDQIWR	5	5	5	>sp|O35218|CPSF2_MOUSE Cleavage and polyadenylation specificity factor subunit 2 OS=Mus musculus GN=Cpsf2 PE=1 SV=1	1	5	5	5	7.3	7.3	7.3	88.382	782	7.9413	4.5	2.8	4.5	1	2.8	1.8	4.5	4.5	0	0	1.2	1	0	0	1	2.7	2.2	1	2.8	5.1	2.8	0	4.5	1.8				O35218	18202027	51786	Cpsf2	O35218
573	Cleavage and polyadenylation specificity factor subunit 3 OS=Mus musculus GN=Cpsf3 PE=1 SV=2	Cleavage and polyadenylation specificity factor subunit 3 OS=Mus musculus GN=Cpsf3 PE=1 SV=2	GLIPVFALGR-LTGDVEELEIQEKPALK-LYEALTPVH-QININNPFVFK-QTQAIPYTGPFYLLYYQLQK-SCIILEFK-WLLSDYVK	7	7	7	>sp|Q9QXK7|CPSF3_MOUSE Cleavage and polyadenylation specificity factor subunit 3 OS=Mus musculus GN=Cpsf3 PE=1 SV=2	1	7	7	7	12.1	12.1	12.1	77.504	684	13.415	11	6.9	5.6	1.5	5.1	8.2	8.2	7.9	2.8	6.6	0	6.9	2.8	2.8	2.5	5.4	5.4	0	8	5.6	3.9	6.6	1.2	2.8		27		Q9QXK7	341940395	54451	Cpsf3	Q9QXK7
574	Cleavage and polyadenylation specificity factor subunit 5 OS=Mus musculus GN=Nudt21 PE=1 SV=1	Cleavage and polyadenylation specificity factor subunit 5 OS=Mus musculus GN=Nudt21 PE=1 SV=1	ALFAVPK-EPLYEKDSSVAAR-KLFLVQLQEK-LFLVQLQEK-LPGGELNPGEDEVEGLK-LPGGELNPGEDEVEGLKR-LPHVLLLQLGTTFFK-SQTGWPR-TINLYPLTNYTFGTK-TINLYPLTNYTFGTKEPLYEK-YIQQTKPLTLER	11	11	11	>sp|Q9CQF3|CPSF5_MOUSE Cleavage and polyadenylation specificity factor subunit 5 OS=Mus musculus GN=Nudt21 PE=1 SV=1	1	11	11	11	42.7	42.7	42.7	26.24	227	111.32	36.6	20.7	36.1	39.6	29.5	35.2	9.7	30	35.7	26.9	11.5	30	30	23.8	24.2	30.8	27.3	32.6	30.4	33	30	26.9	32.6	32.6				Q9CQF3	81880378	68219	Nudt21	Q9CQF3
575	Cleavage and polyadenylation specificity factor subunit 6 OS=Mus musculus GN=Cpsf6 PE=2 SV=1	Cleavage and polyadenylation specificity factor subunit 6 OS=Mus musculus GN=Cpsf6 PE=2 SV=1	AISSSAISR-AVSDASAGDYGSAIETLVTAISLIK-GAAPNVVYTYTGK-GFALVGVGSEASSK-TPLSEAEFEEIMNR	5	5	5	>sp|Q6NVF9|CPSF6_MOUSE Cleavage and polyadenylation specificity factor subunit 6 OS=Mus musculus GN=Cpsf6 PE=2 SV=1	1	5	5	5	13.6	13.6	13.6	59.152	551	27.764	11.3	2.5	8.7	6.2	8.7	8.7	11.1	8.7	6.2	7.1	9.4	2.5	11.3	0	0	7.1	8.7	7.1	8.7	4.5	4.2	7.1	4.5	8.7				Q6NVF9	81911157	432508	Cpsf6	Q6NVF9
576	Cleavage and polyadenylation specificity factor subunit 7 OS=Mus musculus GN=Cpsf7 PE=1 SV=2	Cleavage and polyadenylation specificity factor subunit 7 OS=Mus musculus GN=Cpsf7 PE=1 SV=2	AVSGASAGDYSDAIETLLTAIAVIK-TPAILYTYSGLR	2	2	2	>sp|Q8BTV2|CPSF7_MOUSE Cleavage and polyadenylation specificity factor subunit 7 OS=Mus musculus GN=Cpsf7 PE=1 SV=2	1	2	2	2	7.9	7.9	7.9	52.01	471	9.0923	7.9	2.5	2.5	2.5	2.5	7.9	7.9	2.5	5.3	2.5	7.9	2.5	2.5	2.5	2.5	5.3	0	0	2.5	7.9	2.5	2.5	2.5	7.9				Q8BTV2	88909267	269061	Cpsf7	Q8BTV2
577	Cleavage stimulation factor subunit 1 OS=Mus musculus GN=Cstf1 PE=2 SV=1	Cleavage stimulation factor subunit 1 OS=Mus musculus GN=Cstf1 PE=2 SV=1	LWDGVSNR-TQAVFNHTEDYILLPDER	2	2	2	>sp|Q99LC2|CSTF1_MOUSE Cleavage stimulation factor subunit 1 OS=Mus musculus GN=Cstf1 PE=2 SV=1	1	2	2	2	6	6	6	48.381	431	4.3688	4.2	6	0	4.2	4.2	4.2	4.2	4.2	6	4.2	4.2	4.2	0	0	6	1.9	0	4.2	0	0	0	0	4.2	4.2				Q99LC2	67460583	67337	Cstf1	Q99LC2
578	Cleavage stimulation factor subunit 2 OS=Mus musculus GN=Cstf2 PE=1 SV=2; Cleavage stimulation factor subunit 2 tau variant OS=Mus musculus GN=Cstf2t PE=1 SV=2	Cleavage stimulation factor subunit 2 OS=Mus musculus GN=Cstf2 PE=1 SV=2	IVDPEIALK-SLGTGAPVIESPYGESISPEDAPESISK-GLLGDAPNDPR	3;1	3;1	3;1	>sp|Q8BIQ5|CSTF2_MOUSE Cleavage stimulation factor subunit 2 OS=Mus musculus GN=Cstf2 PE=1 SV=2	2	3	3	3	8.3	8.3	8.3	61.341	580	4.7177	8.3	8.3	1.6	4.8	6.4	0	8.3	4.8	4.8	0	1.6	1.6	4.8	0	0	0	4.8	1.6	0	6.4	1.6	4.8	0	0				Q8BIQ5	71153229	108062	Cstf2	Q8BIQ5
579	Cleavage stimulation factor subunit 3 OS=Mus musculus GN=Cstf3 PE=1 SV=1	Cleavage stimulation factor subunit 3 OS=Mus musculus GN=Cstf3 PE=1 SV=1	FLAFESNIGDLASILK-KLEENPYDLDAWSILIR	2	2	2	>sp|Q99LI7|CSTF3_MOUSE Cleavage stimulation factor subunit 3 OS=Mus musculus GN=Cstf3 PE=1 SV=1	1	2	2	2	4.6	4.6	4.6	82.876	717	4.781	4.6	0	2.2	0	2.2	4.6	4.6	2.2	2.4	2.2	0	2.4	2.4	0	0	4.6	4.6	0	0	4.6	0	2.2	2.2	2.4				Q99LI7	71153232	228410	Cstf3	Q99LI7
580	Clusterin OS=Mus musculus GN=Clu PE=1 SV=1	Clusterin OS=Mus musculus GN=Clu PE=1 SV=1	ASGIIDTLFQDR-CQEILSVDCSTNNPAQANLR-EIQNAVQGVK-ELLQSFQSK-FMDTVAEK-IDSLLESDR-LFDSDPITVVLPEEVSK-LFDSDPITVVLPEEVSKDNPK-LTEQYKELLQSFQSK-QQSQVLDAMQDSFAR-SLLNSLEEAK-VSTVTTHSSDSEVPSR-VTEVVVK-YINKEIQNAVQGVK	14	14	14	>sp|Q06890|CLUS_MOUSE Clusterin OS=Mus musculus GN=Clu PE=1 SV=1	1	14	14	14	32.8	32.8	32.8	51.655	448	323.31	15.4	18.3	17	17.4	15.2	12.5	16.5	18.3	13.2	18.8	10.5	15.2	15.2	13.2	16.5	28.3	4.9	4.2	31.9	19.4	19.4	20.3	22.5	19.4		304;312	175;430	Q06890	729152	12759	Clu	Q06890
581	Coactosin-like protein OS=Mus musculus GN=Cotl1 PE=1 SV=3	Coactosin-like protein OS=Mus musculus GN=Cotl1 PE=1 SV=3	AAYNLVR-AGGANYDAQSE-DDGSAVIWVTFR-EFVISDR-ELEEDFIR-EVVQNFAK-FALITWIGEDVSGLQR-FTTGDAMSK-KELEEDFIR-SKFALITWIGEDVSGLQR-YDGATIVPGDQGADYQHFIQQCTDDVR	11	11	11	>sp|Q9CQI6|COTL1_MOUSE Coactosin-like protein OS=Mus musculus GN=Cotl1 PE=1 SV=3	1	11	11	11	76.1	76.1	76.1	15.944	142	323.31	76.1	75.4	66.9	69.7	73.9	66.9	63.4	65.5	47.9	75.4	36.6	74.6	40.1	69	60.6	73.9	75.4	75.4	69.7	75.4	70.4	55.6	73.9	69		52	70	Q9CQI6	21759077	72042	Cotl1	Q9CQI6
582	Coagulation factor IX OS=Mus musculus GN=F9 PE=2 SV=3	Coagulation factor IX OS=Mus musculus GN=F9 PE=2 SV=3	QASILQYLR-YSHDIALLELDKPLILNSYVTPICVANR	2	2	2	>sp|P16294|FA9_MOUSE Coagulation factor IX OS=Mus musculus GN=F9 PE=2 SV=3	1	2	2	2	7.9	7.9	7.9	52.977	471	6.6723	5.9	0	1.9	1.9	0	7.9	1.9	5.9	0	0	0	0	0	0	0	7.9	5.9	0	5.9	7.9	0	0	0	5.9		345		P16294	122065182	14071	F9	P16294
583	Coagulation factor V OS=Mus musculus GN=F5 PE=1 SV=1	Coagulation factor V OS=Mus musculus GN=F5 PE=1 SV=1	ASEYLTYWEPR-EVVVTGIQTQGAK-KFNPLVVVGLSR-NFFNPPIISR-QHQLGVWPLLPGSFK-QHVLLFAVFDESK-QWLQVDLLK-SEEDIPSELIPLK-SSNSGLLGPTLYAEVGDVIK-VADIEQQAVFAVFDENK-WIVSSLIPK	11	11	10	>sp|O88783|FA5_MOUSE Coagulation factor V OS=Mus musculus GN=F5 PE=1 SV=1	1	11	11	10	6.5	6.5	6	247.23	2183	41.434	1.1	0.8	1.9	0.4	3.8	1.7	2.8	3.3	2.1	1.2	4.9	0.8	0.6	2.4	1.1	1.1	0.6	2.5	1.1	1.9	2.3	1.4	5.5	3.8				O88783	81908472	14067	F5	O88783
584	Coagulation factor XIII A chain OS=Mus musculus GN=F13a1 PE=2 SV=3	Coagulation factor XIII A chain OS=Mus musculus GN=F13a1 PE=2 SV=3	AVPPNNSNAAEVDLPTEELQGLVPR-ESFEETLDPFSSK-FQEGQEEER-GTYIPVPVVK-HVYGELDLQIQR-SIILTIPK-TLNTEGVVK-VEYVIGR	8	8	8	>sp|Q8BH61|F13A_MOUSE Coagulation factor XIII A chain OS=Mus musculus GN=F13a1 PE=2 SV=3	1	8	8	8	12.7	12.7	12.7	83.206	732	10.665	2.3	6.6	6.3	4.1	7.5	5.2	5.1	3.4	2.7	10.5	1.6	10.2	4.1	2.3	2.3	2.5	3	3	5.9	3	6.6	3.7	3.4	8.5				Q8BH61	57012822	74145	F13a1	Q8BH61
585	Coatomer subunit alpha OS=Mus musculus GN=Copa PE=1 SV=2	Coatomer subunit alpha OS=Mus musculus GN=Copa PE=1 SV=2	ASNLENSTYDLYTIPK-CLFTLLGHLDYIR-DADSITLFDVQQK-DADSQNPDAPEGK-GFFEGSIASK-GITGVDLFGTTDAVVK-ISPLQFR-LLELGPKPEVAQQTR-LLHDQVGVIQFGPYK-LNDLIQR-LSFLYLITGNLEK-LVGQSIIAYLQK-NFDKLSFLYLITGNLEK-NGVPAVGLK-NLSPGAVESDVR-QELILSNSEDK-QLFLQTYAR-QQPLFVSGGDDYK-QQPLFVSGGDDYKIK-RLLELGPKPEVAQQTR-SGAWDESGVFIYTTSNHIK-SILLSVPLLVVDNK-SSGLTAVWVAR-TALNLFFK-TLDLPIYVTR-VWDISGLR-YAVTTGDHGIIR	27	27	27	>sp|Q8CIE6|COPA_MOUSE Coatomer subunit alpha OS=Mus musculus GN=Copa PE=1 SV=2	1	27	27	27	23.9	23.9	23.9	138.43	1224	72.218	10.3	8	12.8	7.6	14	9.5	11.5	13.2	7.4	16.5	15.7	8	12.6	9.2	11.4	10.4	9.2	7.4	6.8	10.5	5.9	16.7	17	15.6		85		Q8CIE6	341940380	12847	Copa	Q8CIE6
586	Coatomer subunit beta OS=Mus musculus GN=Copb1 PE=1 SV=1	Coatomer subunit beta OS=Mus musculus GN=Copb1 PE=1 SV=1	AAAQCYIDLIIK-CIYNLLQSSSPAVK-EAGELKPEEEITVGPVQK-GALWILGEYCSTK-LLLVFWEIVPK-LVEKPSPLTLAPHDFANIK-NAVLAIYTIYR-NFEHLIPDAPELIHDFLVNEK-NVEELVIVLK-NVTVQPDDPISFMQLTAK-SLGEIPIVESEIKK-TLQLALDLVSSR-VASTENGIIFGNIVYDVSGAASDR-VLQDLVMDILR-VLSTPDLEVR-VTVNTNMTDLNDYLQHILK-YEAAGTLVTLSSAPTAIK	17	17	17	>sp|Q9JIF7|COPB_MOUSE Coatomer subunit beta OS=Mus musculus GN=Copb1 PE=1 SV=1	1	17	17	17	26.8	26.8	26.8	107.06	953	127.8	21.3	14.6	16.3	18.2	13.1	12	13.1	18	7.8	10.4	8.3	9.2	13.3	9.5	15.8	19.1	10.4	10.7	13.4	22.4	10.8	14.4	20.5	20.4		248;284;466		Q9JIF7	13124070	70349	Copb1	Q9JIF7
587	Coatomer subunit beta' OS=Mus musculus GN=Copb2 PE=2 SV=2	Coatomer subunit beta' OS=Mus musculus GN=Copb2 PE=2 SV=2	AAESLADPTEYENLFPGLK-DNNQFASASLDR-EAFVVEEWVK-FELALQLGELK-GSNNVALGYDEGSIIVK-LPEAAFLAR-QLAELAISK-QQALTVSTDPEHR-SFGSAQEFAWAHDSSEYAIR-SFKPDFGAESIYGGFLLGVR-SVNGLAFYDWENTELIR-TFEVCDLPVR-TGRLPEAAFLAR-TYLPSQVSR-VFNYNTLER-VLAAQETHEGVTEDGIEDAFEVLGEIQEIVK-VWCVASLR-VWQLGSSSPNFTLEGHEK	18	18	18	>sp|O55029|COPB2_MOUSE Coatomer subunit beta OS=Mus musculus GN=Copb2 PE=2 SV=2	1	18	18	18	27.1	27.1	27.1	102.45	905	65.829	22.8	10.2	17.7	17.3	5	9.6	16.9	17.7	14	16.4	4.1	8.3	12.5	5.9	16	17.5	10.4	15.5	11.5	19	9.1	10.4	22.4	18.7		56;276		O55029	18266783	50797	Copb2	O55029
588	Coatomer subunit delta OS=Mus musculus GN=Arcn1 PE=1 SV=2	Coatomer subunit delta OS=Mus musculus GN=Arcn1 PE=1 SV=2	ENVNLAQIR-FSTETTFLVDKYEIL-IEGLLAAFPK-LFTAESLIGLK-NSNILEDLETLR-NTLEWCLPVIDAK-QHTFVETESVR-SFPVNSDVGVLK-SGSLEFSIPGQPNDFFPVQVSFISK-TRIEGLLAAFPK-VTQVDGNSPVR	11	11	11	>sp|Q5XJY5|COPD_MOUSE Coatomer subunit delta OS=Mus musculus GN=Arcn1 PE=1 SV=2	1	11	11	11	25.6	25.6	25.6	57.229	511	43.068	23.5	13.3	20.7	16.4	15.7	18.6	18	13.9	13.1	13.9	11.5	16	13.1	8.8	12.7	13.5	11.7	13.1	10.8	23.5	18.6	18.6	23.1	15.7		441		Q5XJY5	338817864	213827	Arcn1	Q5XJY5
589	Coatomer subunit epsilon OS=Mus musculus GN=Cope PE=2 SV=3	Coatomer subunit epsilon OS=Mus musculus GN=Cope PE=2 SV=3	APPVPGAVSGGSGEVDELFDVK-EVERDVFLYR-KYGVVLDEIKPSSAPELQAVR-LQEAYYIFQELADK-MQDQDEDATLTQLATAWVNLAVGGEK-NAFYIGSYQQCINEAQR-SVDVTNTTFLLMAASIYFHDQNPDAALR-YGVVLDEIKPSSAPELQAVR	8	8	8	>sp|O89079|COPE_MOUSE Coatomer subunit epsilon OS=Mus musculus GN=Cope PE=2 SV=3	1	8	8	8	44.8	44.8	44.8	34.567	308	62.915	24	18.2	21.8	14.6	27.3	27.3	14.3	21.8	18.2	23.7	24	18.2	18.5	6.8	26.9	36	18.5	27.3	14.9	34.7	18.2	18.5	27.3	17.2		34	172	O89079	50403700	59042	Cope	O89079
590	Coatomer subunit gamma-1 OS=Mus musculus GN=Copg1 PE=2 SV=1	Coatomer subunit gamma-1 OS=Mus musculus GN=Copg1 PE=2 SV=1	AIVDCIISIIEENSESK-ALNAGYILNGLTVSIPGLEK-ALQQYTLEPSEKPFDLK-ELAPAVSVLQLFCSSPK-HPSAVTACNLDLENLVTDSNR-LFQSNDPTLR-NTHTLLLAGVFR-QAIVDKVPSVSSSALVSSLHLLK-QEIFQEQLAAVPEFQGLGPLFK-SSEELPVDIILASVG-SSPEPVALTESETEYVIR-TLEEAVGNIVK-VPSVSSSALVSSLHLLK-SIATLAITTLLK	14	14	13	>sp|Q9QZE5|COPG1_MOUSE Coatomer subunit gamma-1 OS=Mus musculus GN=Copg1 PE=2 SV=1	1	14	14	13	24.6	24.6	23.2	97.512	874	155.56	11.4	13.2	13.8	9.3	11.4	10.1	17.5	12.4	12.7	14.1	9.8	6.9	10.2	6.6	12	9.8	12.1	6.6	10.1	19.7	10.6	12.1	15.1	11.4		296;325;420		Q9QZE5	81882043	54161	Copg1	Q9QZE5
591	Coatomer subunit gamma-2 OS=Mus musculus GN=Copg2 PE=2 SV=1	Coatomer subunit gamma-2 OS=Mus musculus GN=Copg2 PE=2 SV=1	FGAQNESLLPSILVLLQR	2	1	1	>sp|Q9QXK3|COPG2_MOUSE Coatomer subunit gamma-2 OS=Mus musculus GN=Copg2 PE=2 SV=1	1	2	1	1	3.4	2.1	2.1	97.679	871	25.327	3.4	3.4	3.4	3.4	1.4	2.1	3.4	3.4	2.1	3.4	1.4	1.4	1.4	1.4	3.4	3.4	1.4	1.4	0	3.4	1.4	3.4	3.4	3.4				Q9QXK3	13124084	54160	Copg2	Q9QXK3
592	Coatomer subunit zeta-1 OS=Mus musculus GN=Copz1 PE=2 SV=1	Coatomer subunit zeta-1 OS=Mus musculus GN=Copz1 PE=2 SV=1	AILILDNDGDR-AILILDNDGDRLFAK-GEDVPLTEQTVSQVLQSAK-TDSEIALLEGLTVVYK-VALRGEDVPLTEQTVSQVLQSAK-YYDDTYPSVK	6	6	6	>sp|P61924|COPZ1_MOUSE Coatomer subunit zeta-1 OS=Mus musculus GN=Copz1 PE=2 SV=1	1	6	6	6	36.2	36.2	36.2	20.198	177	84.003	24.9	22.6	24.9	27.1	24.9	24.9	33.9	27.1	24.9	24.9	16.4	24.9	22.6	27.1	21.5	36.2	24.9	18.6	22.6	36.2	36.2	24.9	24.9	24.9				P61924	48428831	56447	Copz1	P61924
593	Cochlin OS=Mus musculus GN=Coch PE=2 SV=2	Cochlin OS=Mus musculus GN=Coch PE=2 SV=2	DFLESQQ-DSPNKNFLVIVTDGQSYDDVR-DVLFAIK-EFTGLEPIVSDVIR-ENVLAVLANIR-FFTADTGVR-GVIGTSGGPVR-IAAVQFTYDQR-LMLEFVSNIAK-NFLVIVTDGQSYDDVR-NVFGPIR-TEFSFTDYNTK-TEFSFTDYNTKENVLAVLANIR-TFEISDIGAK-VYSLPGR-WSASFAVTK-YMSGGTATGDAIAFTVR	17	17	17	>sp|Q62507|COCH_MOUSE Cochlin OS=Mus musculus GN=Coch PE=2 SV=2	1	17	17	17	29.5	29.5	29.5	59.949	552	118.63	19.9	14.9	14.5	18.1	24.1	16.1	16.8	19.7	24.5	12.5	16.1	18.1	17.8	12	13.2	11.2	9.1	13.9	10	20.3	14.9	13.2	14.5	8.3			388	Q62507	12644458	12810	Coch	Q62507
594	Cofilin-1 OS=Mus musculus GN=Cfl1 PE=1 SV=3	Cofilin-1 OS=Mus musculus GN=Cfl1 PE=1 SV=3	AVLFCLSEDKK-EDLVFIFWAPENAPLK-EILVGDVGQTVDDPYTTFVK-HELQANCYEEVK-HELQANCYEEVKDR-KEDLVFIFWAPENAPLK-LGGSAVISLEGKPL-NIILEEGK-NIILEEGKEILVGDVGQTVDDPYTTFVK-YALYDATYETK-MIYASSK	11	11	9	>sp|P18760|COF1_MOUSE Cofilin-1 OS=Mus musculus GN=Cfl1 PE=1 SV=3	1	11	11	9	61.4	61.4	50.6	18.559	166	323.31	61.4	50.6	54.8	50.6	54.8	61.4	41.6	57.2	57.2	56	44	57.2	54.8	44	42.2	50.6	61.4	54.8	53.6	57.2	56	57.2	57.2	54.8		39;139	115	P18760	116849	12631	Cfl1	P18760
595	Cofilin-2 OS=Mus musculus GN=Cfl2 PE=1 SV=1	Cofilin-2 OS=Mus musculus GN=Cfl2 PE=1 SV=1	QIIVEEAK-QILVGDIGDTVEDPYTSFVK	4	2	2	>sp|P45591|COF2_MOUSE Cofilin-2 OS=Mus musculus GN=Cfl2 PE=1 SV=1	1	4	2	2	27.7	16.9	16.9	18.709	166	65.594	27.7	23.5	27.7	18.7	4.2	27.7	23.5	23.5	23.5	23.5	0	23.5	4.2	16.9	11.4	16.9	15.7	16.3	27.7	23.5	23.5	6.6	23.5	27.7			115	P45591	1168994	12632	Cfl2	P45591
596	Cohesin subunit SA-1 OS=Mus musculus GN=Stag1 PE=2 SV=3	Cohesin subunit SA-1 OS=Mus musculus GN=Stag1 PE=2 SV=3	LELFTNR-REDVWLPLISYR-SQLIDEFVDR	5	3	3	>sp|Q9D3E6|STAG1_MOUSE Cohesin subunit SA-1 OS=Mus musculus GN=Stag1 PE=2 SV=3	1	5	3	3	3.7	2.3	2.3	144.44	1258	5.0243	0.8	0.6	1.4	2.3	0.6	2.1	1.4	1.5	1	0.6	1.4	2.1	1.4	0.8	1.5	1.5	1.4	0.6	0.6	1.5	1.4	1.4	3.7	1.4				Q9D3E6	341942104	20842	Stag1	Q9D3E6
597	Cohesin subunit SA-2 OS=Mus musculus GN=Stag2 PE=1 SV=3	Cohesin subunit SA-2 OS=Mus musculus GN=Stag2 PE=1 SV=3	FALTFGLDQLK-ITELFAVALPQLLAK-LELFTSR-NLLAAFCK-LELLLQK-YYNDYGDIIK	6	6	4	>sp|O35638|STAG2_MOUSE Cohesin subunit SA-2 OS=Mus musculus GN=Stag2 PE=1 SV=3	1	6	6	4	4.7	4.7	3.3	141.28	1231	12.1	1.9	3.2	2.7	4.1	2.4	3.5	2	2.4	2.7	1.8	2.4	2.6	2.6	0	1.8	3.2	1.8	0.6	1.1	2.7	2.8	2.4	2.6	2.6		869		O35638	341942105	20843	Stag2	O35638
598	Coiled-coil and C2 domain-containing protein 1B OS=Mus musculus GN=Cc2d1b PE=2 SV=1	Coiled-coil and C2 domain-containing protein 1B OS=Mus musculus GN=Cc2d1b PE=2 SV=1	EQVTLLEAR-GLQALLEER-SLEAQIIQAR-VDFAELPVPPGFPPIPGLEPR-VPSPLTDEEGDFILIHHEDLR	5	5	5	>sp|Q8BRN9|C2D1B_MOUSE Coiled-coil and C2 domain-containing protein 1B OS=Mus musculus GN=Cc2d1b PE=2 SV=1	1	5	5	5	8.3	8.3	8.3	93.09	848	6.3605	2.5	2.2	4.7	2.5	4.7	2.2	2.2	4.7	0	1.2	2.2	2.2	0	0	0	3.7	2.2	0	1.2	5	4.7	2.2	7.2	3.7				Q8BRN9	81897220	319965	Cc2d1b	Q8BRN9
599	Coiled-coil domain-containing protein 134 OS=Mus musculus GN=Ccdc134 PE=2 SV=1	Coiled-coil domain-containing protein 134 OS=Mus musculus GN=Ccdc134 PE=2 SV=1	TDQTEFIPSTDPFQK-TVLIAADVLPDGPVPQDEK	2	2	2	>sp|Q8C7V8|CC134_MOUSE Coiled-coil domain-containing protein 134 OS=Mus musculus GN=Ccdc134 PE=2 SV=1	1	2	2	2	14.8	14.8	14.8	26.494	229	5.6595	6.6	6.6	14.8	14.8	8.3	14.8	0	14.8	14.8	14.8	8.3	14.8	6.6	0	14.8	14.8	14.8	8.3	14.8	14.8	14.8	0	8.3	14.8				Q8C7V8	81899247	76457	Ccdc134	Q8C7V8
600	Coiled-coil domain-containing protein 158 OS=Mus musculus GN=Ccdc158 PE=2 SV=1	Coiled-coil domain-containing protein 158 OS=Mus musculus GN=Ccdc158 PE=2 SV=1	DAMADIR-LLADLHK-TPSLGALEDR	3	3	3	>sp|Q8CDI6|CD158_MOUSE Coiled-coil domain-containing protein 158 OS=Mus musculus GN=Ccdc158 PE=2 SV=1	1	3	3	3	2.2	2.2	2.2	126.82	1109	2.8077	0.6	0.9	1.3	0.6	0.6	0.6	0	0.6	0.6	0.6	0.6	0.6	0.6	0.6	1.3	1.3	0.6	0.6	2.2	0.6	0.6	0	1.3	0.6				Q8CDI6	81899972	320696	Ccdc158	Q8CDI6
601	Coiled-coil domain-containing protein 22 OS=Mus musculus GN=Ccdc22 PE=1 SV=1	Coiled-coil domain-containing protein 22 OS=Mus musculus GN=Ccdc22 PE=1 SV=1	DLLLFLAER-DQLALPWVPPLLR-LQGSALQQPFHSSR-QSELSVAEQEQALR-TVELLPDGAANLAK	5	5	5	>sp|Q9JIG7|CCD22_MOUSE Coiled-coil domain-containing protein 22 OS=Mus musculus GN=Ccdc22 PE=1 SV=1	1	5	5	5	10.2	10.2	10.2	70.843	627	11.988	6.5	2.2	6.5	0	6.5	4.3	6.5	6.5	0	6.5	4.3	6.5	4.3	4.3	4.3	4.3	6.5	4.5	2.1	5.7	0	8	6.5	6.5				Q9JIG7	81881905	54638	Ccdc22	Q9JIG7
602	Coiled-coil domain-containing protein 47 OS=Mus musculus GN=Ccdc47 PE=2 SV=2	Coiled-coil domain-containing protein 47 OS=Mus musculus GN=Ccdc47 PE=2 SV=2	DMESLLPLMNMVIYSIDK-ELLESNFTLVGDDGTNKEATSTGK-QDLLNVLAR-RQDLLNVLAR	4	4	4	>sp|Q9D024|CCD47_MOUSE Coiled-coil domain-containing protein 47 OS=Mus musculus GN=Ccdc47 PE=2 SV=2	1	4	4	4	10.8	10.8	10.8	55.843	483	4.5727	0	2.1	7	7	2.1	7	2.1	2.1	2.1	1.9	2.1	7	7	0	0	7	5	0	2.1	5.8	0	7	7	7				Q9D024	97044991	67163	Ccdc47	Q9D024
605	Cold shock domain-containing protein E1 OS=Mus musculus GN=Csde1 PE=2 SV=1	Cold shock domain-containing protein E1 OS=Mus musculus GN=Csde1 PE=2 SV=1	AHSVNGITEEANPTIYSGK-ATNIEVLSNTFQFTNEAR-EAFGFIER-FLGTVEK-LLGYVATLK-LTIAFQAK-NITLDDASAPR-NQNDPLPGR-QRPGQQIATCVR	9	9	9	>sp|Q91W50|CSDE1_MOUSE Cold shock domain-containing protein E1 OS=Mus musculus GN=Csde1 PE=2 SV=1	1	9	9	9	12.7	12.7	12.7	88.79	798	17.982	7.1	4.9	3.8	1	1.1	4.9	3.5	3.5	2.4	4.9	0.9	4.9	2.3	2.4	4.8	5.6	8.3	0	1	4.6	4.8	5.8	4.6	8.1		506		Q91W50	73620670	229663	Csde1	Q91W50
606	Cold-inducible RNA-binding protein OS=Mus musculus GN=Cirbp PE=1 SV=1	Cold-inducible RNA-binding protein OS=Mus musculus GN=Cirbp PE=1 SV=1	DSYDSYATHNE-LFVGGLSFDTNEQALEQVFSK-YGQISEVVVVK	3	3	3	>sp|P60824|CIRBP_MOUSE Cold-inducible RNA-binding protein OS=Mus musculus GN=Cirbp PE=1 SV=1	1	3	3	3	25	25	25	18.607	172	7.6356	12.8	6.4	6.4	6.4	6.4	12.8	6.4	6.4	6.4	6.4	0	12.8	0	12.8	0	25	6.4	6.4	6.4	18.6	6.4	0	18.6	6.4				P60824	46397384	12696	Cirbp	P60824
607	Colipase OS=Mus musculus GN=Clps PE=2 SV=1	Colipase OS=Mus musculus GN=Clps PE=2 SV=1	CCQHDTILGIAR-TLYGIYYR	2	2	2	>sp|Q9CQC2|COL_MOUSE Colipase OS=Mus musculus GN=Clps PE=2 SV=1	1	2	2	2	17.7	17.7	17.7	12.444	113	4.5344	0	10.6	0	0	0	17.7	17.7	17.7	0	10.6	0	0	0	7.1	17.7	0	0	0	0	0	0	0	17.7	17.7		45;46		Q9CQC2	24418352	109791	Clps	Q9CQC2
608	Collagen alpha-1(I) chain OS=Mus musculus GN=Col1a1 PE=1 SV=4	Collagen alpha-1(I) chain OS=Mus musculus GN=Col1a1 PE=1 SV=4	GETGPAGPAGPIGPAGAR-GFSGLDGAK-GRPGPPGTAGAR-NGDRGETGPAGPAGPIGPAGAR	4	4	4	>sp|P11087|CO1A1_MOUSE Collagen alpha-1(I) chain OS=Mus musculus GN=Col1a1 PE=1 SV=4	1	4	4	4	3	3	3	138.03	1453	50.493	2.1	3	2.1	1.5	1.5	1.5	2.1	2.1	2.1	3	3	3	2.1	1.5	1.5	1.5	1.5	2.1	2.3	1.5	2.1	1.5	3	3				P11087	83301500	12842	Col1a1	P11087
609	Collagen alpha-1(IV) chain OS=Mus musculus GN=Col4a1 PE=2 SV=4	Collagen alpha-1(IV) chain OS=Mus musculus GN=Col4a1 PE=2 SV=4	FSTMPFLFCNINNVCNFASR-GLQGPPGPPGPYDVIK-GTCNYYANAYSFWLATIER-HSQTTDDPLCPPGTK-ILYHGYSLLYVQGNER	5	5	5	>sp|P02463|CO4A1_MOUSE Collagen alpha-1(IV) chain OS=Mus musculus GN=Col4a1 PE=2 SV=4	1	5	5	5	5.2	5.2	5.2	160.68	1669	27.733	3	3	1.9	3	3.1	1	2.8	2.2	4	1.9	1.9	0.9	0	0	1.9	1	0	2.1	0.9	2.1	1	1.9	3.1	4.2		1460;1505;1511;1622	1500	P02463	126302535	12826	Col4a1	P02463
610	Collagen alpha-1(VI) chain OS=Mus musculus GN=Col6a1 PE=2 SV=1	Collagen alpha-1(VI) chain OS=Mus musculus GN=Col6a1 PE=2 SV=1	ADPSQDVR-CPDYTCPITFSSPADITILLDSSASVGSHNFETTK-DAEEVISQTIDTIVDMIK-DTTPLSVLCGADIQVVSVGIK-DVFGFVAGSDQLNVISCQGLSQGRPGISLVK-ENYAELLDDGFLK-GDPGYEGER-GVLYQTVSR-IALVITDGR-KLQWMAGGTFTGEALQYTR-LLPPTQNNR-LSIIATDHTYR-NLVWNAGALHYSDEVEIIR-NNVEQVCCSFECQAAR-TAEYDVAFGER-VAVVQYSGQGQQQPGR-VFSVAITPDHLEPR-VLLFSDGNSQGATAEAIEK-VPNYQALLR-YLIVVTDGHPLEGYK-YLIVVTDGHPLEGYKEPCGGLEDAVNEAK	21	21	21	>sp|Q04857|CO6A1_MOUSE Collagen alpha-1(VI) chain OS=Mus musculus GN=Col6a1 PE=2 SV=1	1	21	21	21	31.7	31.7	31.7	108.49	1025	323.31	23.2	16.4	22.5	15.9	14.5	13.7	19.7	19.6	20.7	15.3	19.2	16.3	18.9	14.7	18.9	22.3	17.7	20.1	18	28.7	19.2	16.3	22.5	17.6		168;246;247;251;744;773;812;817	237;696	Q04857	543913	12833	Col6a1	Q04857
611	Collagen alpha-1(XII) chain OS=Mus musculus GN=Col12a1 PE=2 SV=3	Collagen alpha-1(XII) chain OS=Mus musculus GN=Col12a1 PE=2 SV=3	ALALGALQNIR-DLKPETDYVVNVYSVVEDEYSEPLKGTEK-GEVQTVTFDTDEVK-GPGDLEAPTNLVISER-IIYSPTVGDPIDEYTTVPGR-ITYQPSTGEGNEQTITVGGR-IVEVFEIGPK-IVYSPVAGTRPSESIVVPGNTR-LFYAPTSGGPEELVPIPGNTNYAILR-LKPDTPYTITVYSQYPDGEGGR-NFASVQGVSLESGSFPSYSAYR-NIQVYNPTPNSLDVR-NLQPDTPYTITVVPVYTEGDGGR-NNVILQPLQPDTPYK-RVPAPTNLQFTEVTPESFR-SLLQAVANLPYK-VAIIITDGK-VLVVVTDGR-VSWDPSPSPVLGYK-VYDPSTSSLSVR	20	20	20	>sp|Q60847|COCA1_MOUSE Collagen alpha-1(XII) chain OS=Mus musculus GN=Col12a1 PE=2 SV=3	1	20	20	20	10.9	10.9	10.9	340.21	3120	43.739	3.7	6.8	7.5	2.7	7.7	5.2	7.4	7.4	8.6	3.7	7.7	4.3	5.9	1	6.4	6.8	3.1	3.2	5.8	8.6	7.4	6.5	8.1	7				Q60847	146325834	12816	Col12a1	Q60847
612	Collagen alpha-1(XIV) chain OS=Mus musculus GN=Col14a1 PE=2 SV=2	Collagen alpha-1(XIV) chain OS=Mus musculus GN=Col14a1 PE=2 SV=2	ASALATIGPPTELITSEVTAR-DALVSQPTK-DTLFTSDSGTR-ESGVELFAIGVK-ETLLDAIR-GGKPEEVVVDGSVSSTVLK-GGNTLTGLALNFIFENSFKPEAGSR-IEWHLNAFNTKDEVIDAVR-IGILITDGK-IINFLYSTVGALDK-ILPDTPQEPFALWEILNK-ITWDPPSGPVK-IVLESLQDTQAQESTVGGGVNR-IVYTSADGTEINEVEVDPITTFPLK-LLVAPASGGK-LQELEGPSVSIMQK-LTWDPASGK-NFLENLVTAFNVGSEK-NLMSSTEYQIAVFAVSAHTASEGLR-NLVVDDETATSLR-NSEPLVGIILDNGGK-TLPSSGPQNLR-VIVVITDGR-VRWDAVPGATGYLILYAPLTEGLAGDEK-VS…	26	26	26	>sp|Q80X19|COEA1_MOUSE Collagen alpha-1(XIV) chain OS=Mus musculus GN=Col14a1 PE=2 SV=2	1	26	26	26	22.1	22.1	22.1	193.01	1797	146.47	13.8	7.8	14	12	13.9	9.8	17.1	14.4	14.5	9.3	14.4	9.6	10.6	3.3	12.1	15.5	9	13.5	9.3	16.5	6.3	13.4	14.7	9.6			1003	Q80X19	146345398	12818	Col14a1	Q80X19
613	Collagen alpha-1(XVIII) chain OS=Mus musculus GN=Col18a1 PE=1 SV=4	Collagen alpha-1(XVIII) chain OS=Mus musculus GN=Col18a1 PE=1 SV=4	LQDLYSIVR-TETTGATGQASSLLSGR	2	2	2	>sp|P39061|COIA1_MOUSE Collagen alpha-1(XVIII) chain OS=Mus musculus GN=Col18a1 PE=1 SV=4	1	2	2	2	1.5	1.5	1.5	182.17	1774	13.52	0.5	1	1.5	1	1.5	1	1.5	0.5	1.5	1	1.5	1.5	1	0	1.5	1.5	0	0	0.5	1.5	1.5	1	1.5	1				P39061	146345401	12822	Col18a1	P39061
614	Collagen alpha-2(I) chain OS=Mus musculus GN=Col1a2 PE=2 SV=2	Collagen alpha-2(I) chain OS=Mus musculus GN=Col1a2 PE=2 SV=2	GPAGPSGPVGK-GPSGPQGIR-SGQPGPVGPAGVR	3	3	3	>sp|Q01149|CO1A2_MOUSE Collagen alpha-2(I) chain OS=Mus musculus GN=Col1a2 PE=2 SV=2	1	3	3	3	2.4	2.4	2.4	129.56	1372	5.9056	1.7	2.4	0.9	0	2.4	0.9	1.7	1.6	0.9	2.4	2.4	0.8	2.4	1.5	0	0.8	0	2.4	0.8	0	1.7	2.4	1.7	0.8				Q01149	17865659	12843	Col1a2	Q01149
615	Collagen alpha-2(IV) chain OS=Mus musculus GN=Col4a2 PE=2 SV=4	Collagen alpha-2(IV) chain OS=Mus musculus GN=Col4a2 PE=2 SV=4	GLDGFQGPSGPR-GPPGPPPLILPGMK-IAVQPGTLGPQGR-LWSGYSLLYFEGQEK-SVSIGYLLVK-YSFWLTTIPEQNFQSTPSADTLK	6	6	6	>sp|P08122|CO4A2_MOUSE Collagen alpha-2(IV) chain OS=Mus musculus GN=Col4a2 PE=2 SV=4	1	6	6	6	5.1	5.1	5.1	167.32	1707	16.071	2.7	3.4	2.7	2.7	2.7	1.3	3.5	3.6	2.7	2.1	3.4	1.3	2.1	2.1	2.7	2.7	2.1	2.1	1.3	2.7	2.7	2.1	2.7	2.7				P08122	126302536	12827	Col4a2	P08122
616	Collagen alpha-2(VI) chain OS=Mus musculus GN=Col6a2 PE=2 SV=3	Collagen alpha-2(VI) chain OS=Mus musculus GN=Col6a2 PE=2 SV=3	ATYLNSFSHVGTGIVHAINNVVR-DDDLNLR-DFDSLAQPSFFDR-DIANSPHELYR-EKDFDSLAQPSFFDR-FAYNQLIK-FVEDVSR-GVVNFAVVITDGHVTGSPCGGIK-KQNVVPTVVAVGGDVDMDVLTK-LDDERVNSLSSFK-LFAVAPNR-NFVINVVNR-NLEWIAGGTWTPSALK-NLNEQGLR-NNYATMRPDSTEIDQDTINR-QNVVPTVVAVGGDVDMDVLTK-RDDDPLNAR-VFAVVITDGR-VGVVQYSHEGTFEAIR-VGVVQYSHEGTFEAIRLDDER-VNSLSSFK-YGGLHFSDQVEVFSPPGSDR	22	22	22	>sp|Q02788|CO6A2_MOUSE Collagen alpha-2(VI) chain OS=Mus musculus GN=Col6a2 PE=2 SV=3	1	22	22	22	23.7	23.7	23.7	110.33	1034	323.31	19	12	14.5	13.9	17.3	8.7	16.5	15.6	12.3	14.9	15.6	14.6	16.2	14.3	12.6	16.9	8.9	17.6	13	20.9	12	14.8	22.2	12.4		185	234;997	Q02788	125987813	12834	Col6a2	Q02788
617	Collagen alpha-4(VI) chain OS=Mus musculus GN=Col6a4 PE=1 SV=2	Collagen alpha-4(VI) chain OS=Mus musculus GN=Col6a4 PE=1 SV=2	AALLQAVR-FGVVQYSDK-FTEAFLNLLNSGINQYPPPELVK-QPLSSSLPSLPSVLLK-VGLAQYSDTPTSEFLLSVYHR	5	5	5	>sp|A2AX52|CO6A4_MOUSE Collagen alpha-4(VI) chain OS=Mus musculus GN=Col6a4 PE=1 SV=2	1	5	5	5	3.3	3.3	3.3	250.8	2309	8.6021	1	2	1	1	1	0.7	2	2.6	1.3	0	1.1	0.7	0.7	0	0.3	1.7	0	0.7	1	2	2	1	1.7	0.7				A2AX52	189082905	68553	Col6a4	A2AX52
618	Collagen alpha-5(VI) chain OS=Mus musculus GN=Col6a5 PE=1 SV=3; Collagen alpha-6(VI) chain OS=Mus musculus GN=Col6a6 PE=1 SV=2	Collagen alpha-5(VI) chain OS=Mus musculus GN=Col6a5 PE=1 SV=3	AAFDSLLHVTVR-ALDFILPLIK-ALVSSVIDSFHITSNPSASESGDR-AQDEVGGPATALR-AQGVPQIAVLVTHR-AQTISSLR-DSLADLIFLVDESVGTTQNLR-DTITSIVSDLNIR-EQLLPITGNSEK-LESYLPGILEDITSIR-NAGVPQTLVVITSSSPR-NEIWTQVSTR-NEVEFPVSR-NTLTGGALTFVNEYFDLSK-QGQPLFQGHPR-TLSQYLGNIAER-VALLSYSPSESSR-VAVFFSNGQAASR-VAVVSYDSDTSYLIR-VGVVQYSHKNEVEFPVSR-VNFGQNFDSLK-VNSDQEFPAK-YTDGIDLK-NFGFIGGSLK-VALAQYSDALHNEFQLGTFK	25;2	25;2	25;2	>sp|A6H584|CO6A5_MOUSE Collagen alpha-5(VI) chain OS=Mus musculus GN=Col6a5 PE=1 SV=3	2	25	25	25	12.5	12.5	12.5	289.51	2640	128.87	0.8	0.4	3.1	0.3	1	0	4.5	2.3	6.4	0.8	2.7	1.2	6.5	0.8	2.7	1.9	5.8	5.8	4	4.7	4.7	9.5	8.9	8.4				A6H584	544584810	665033	Col6a5	A6H584
619	COMM domain-containing protein 10 OS=Mus musculus GN=Commd10 PE=2 SV=1	COMM domain-containing protein 10 OS=Mus musculus GN=Commd10 PE=2 SV=1	AVPLINAIDTGR-LQSPQAVLQLGVSK	2	2	2	>sp|Q8JZY2|COMDA_MOUSE COMM domain-containing protein 10 OS=Mus musculus GN=Commd10 PE=2 SV=1	1	2	2	2	12.9	12.9	12.9	22.812	202	2.5174	6.9	0	6.9	0	6.9	6.9	0	6.9	12.9	0	0	6.9	0	0	0	6.9	0	6.9	6.9	6.9	0	0	6.9	6.9				Q8JZY2	51316011	69456	Commd10	Q8JZY2
620	COMM domain-containing protein 2 OS=Mus musculus GN=Commd2 PE=1 SV=1	COMM domain-containing protein 2 OS=Mus musculus GN=Commd2 PE=1 SV=1	IAVEFLR-LDVQLASR-TILNELAPR	3	3	3	>sp|Q8BXC6|COMD2_MOUSE COMM domain-containing protein 2 OS=Mus musculus GN=Commd2 PE=1 SV=1	1	3	3	3	12.1	12.1	12.1	22.848	199	3.6646	12.1	3.5	12.1	8.5	12.1	8	8.5	12.1	12.1	12.1	8.5	8.5	12.1	4.5	4	4.5	12.1	4.5	7.5	8.5	4	12.1	8.5	8				Q8BXC6	51315985	52245	Commd2	Q8BXC6
621	COMM domain-containing protein 3 OS=Mus musculus GN=Commd3 PE=2 SV=1	COMM domain-containing protein 3 OS=Mus musculus GN=Commd3 PE=2 SV=1	AAFQSLLDAR-ELSESVQR-GIQTLADPGSFDSNAFALLLR-NSLETLLGSIGR-QIDPVVLK	5	5	5	>sp|Q63829|COMD3_MOUSE COMM domain-containing protein 3 OS=Mus musculus GN=Commd3 PE=2 SV=1	1	5	5	5	30.3	30.3	30.3	22.037	195	12.934	15.4	19.5	5.1	15.9	11.3	22.1	5.1	15.4	26.2	11.3	9.2	5.1	15.4	6.2	5.1	14.9	9.2	5.1	11.3	22.1	5.1	11.3	15.9	9.2				Q63829	51315843	12238	Commd3	Q63829
622	COMM domain-containing protein 4 OS=Mus musculus GN=Commd4 PE=2 SV=1	COMM domain-containing protein 4 OS=Mus musculus GN=Commd4 PE=2 SV=1	ATVAVLSFILSSAAK-ELLGQGIDYEK-HSVDSDSLSSELQQLGLPK	3	3	3	>sp|Q9CQ02|COMD4_MOUSE COMM domain-containing protein 4 OS=Mus musculus GN=Commd4 PE=2 SV=1	1	3	3	3	22.6	22.6	22.6	21.86	199	15.721	17.1	0	9.5	17.1	0	17.1	0	0	17.1	9.5	0	17.1	0	0	9.5	17.1	0	17.1	0	22.6	17.1	9.5	17.1	9.5				Q9CQ02	51316079	66199	Commd4	Q9CQ02
623	COMM domain-containing protein 5 OS=Mus musculus GN=Commd5 PE=2 SV=1	COMM domain-containing protein 5 OS=Mus musculus GN=Commd5 PE=2 SV=1	FEVPIAK-LAVLLAGTHTLLQQALR-VSFLGSQPSAEVTAVAQLLK-YSVALVLK	4	4	4	>sp|Q8R395|COMD5_MOUSE COMM domain-containing protein 5 OS=Mus musculus GN=Commd5 PE=2 SV=1	1	4	4	4	23.2	23.2	23.2	24.493	224	9.3504	19.6	0	10.7	16.5	3.1	19.6	0	19.6	20.1	16.5	0	19.6	0	0	0	16.5	19.6	16.5	0	19.6	12.1	3.1	12.1	19.6				Q8R395	51316036	66398	Commd5	Q8R395
624	COMM domain-containing protein 7 OS=Mus musculus GN=Commd7 PE=2 SV=1	COMM domain-containing protein 7 OS=Mus musculus GN=Commd7 PE=2 SV=1	FLAQLSEFATSNQISLGPLK-GLTAEQVR-SLLLVPNGALK-TDLQTLGLSEEK-VGSIFLQLK	5	5	5	>sp|Q8BG94|COMD7_MOUSE COMM domain-containing protein 7 OS=Mus musculus GN=Commd7 PE=2 SV=1	1	5	5	5	30	30	30	22.652	200	8.8789	10	5.5	5.5	10	5.5	10	20	10	20	10	11.5	4	10	20	8.5	15.5	11.5	9.5	16	24	15.5	10	0	16				Q8BG94	51315978	99311	Commd7	Q8BG94
625	Complement C1q subcomponent subunit A OS=Mus musculus GN=C1qa PE=1 SV=2	Complement C1q subcomponent subunit A OS=Mus musculus GN=C1qa PE=1 SV=2	DQPRPAFSAIR-DSLSFSNTNNK-GLFQVLAGGTVLQLR-IYQGTEADSIFSGFLIFPSA-QNPMTLGNVVIFDK	5	5	5	>sp|P98086|C1QA_MOUSE Complement C1q subcomponent subunit A OS=Mus musculus GN=C1qa PE=1 SV=2	1	5	5	5	29	29	29	25.974	245	16.857	0	4.5	0	0	0	0	0	4.5	4.5	6.1	6.1	6.1	0	0	0	0	0	0	4.5	29	0	0	0	6.1			125	P98086	408359988	12259	C1qa	P98086
626	Complement C1q subcomponent subunit B OS=Mus musculus GN=C1qb PE=1 SV=2	Complement C1q subcomponent subunit B OS=Mus musculus GN=C1qb PE=1 SV=2	GNLCVNLVR-LEQEEVVHLQATDK-TINSPLRPNQVIR-VITNANENYEPR-VPGLYYFTYHASSR	5	5	5	>sp|P14106|C1QB_MOUSE Complement C1q subcomponent subunit B OS=Mus musculus GN=C1qb PE=1 SV=2	1	5	5	5	24.5	24.5	24.5	26.717	253	22.331	10.3	4.7	19	5.1	4.7	15.4	0	8.3	5.1	9.9	5.1	15.4	15.4	13.8	5.1	9.1	4.7	4.7	9.9	24.5	5.1	15.4	20.9	15.4		179		P14106	408359989	12260	C1qb	P14106
627	Complement C1q subcomponent subunit C OS=Mus musculus GN=C1qc PE=2 SV=2	Complement C1q subcomponent subunit C OS=Mus musculus GN=C1qc PE=2 SV=2	FNSVVTNPQGHYNPSTGK-HQSVFTVTR-QTTQYPEANALVR-QVSSGGVLLR	4	4	4	>sp|Q02105|C1QC_MOUSE Complement C1q subcomponent subunit C OS=Mus musculus GN=C1qc PE=2 SV=2	1	4	4	4	20.3	20.3	20.3	25.991	246	62.486	12.6	12.6	12.6	12.6	5.3	16.7	0	12.6	12.6	0	0	12.6	0	7.3	16.7	7.3	7.3	16.3	16.7	20.3	7.3	0	12.6	12.6				Q02105	408359990	12262	C1qc	Q02105
628	Complement C3 OS=Mus musculus GN=C3 PE=1 SV=3;CON__Q2UVX4	Complement C3 OS=Mus musculus GN=C3 PE=1 SV=3	AAVFNHFISDGVK-ALTQDDGVAK-AVLFNYR-DFDSVPPVVR-DICEGQVNSLPGSINK-DLELLASGVDR-DNHLAPGQQTTLR-EPGQDLVVLSLPITPEFIPSFR-EYVLPSFEVR-GICVADPYEIR-GYTQQLAFK-IFTVDNNLLPVGK-IGQQEVEVK-IILQGSPVVQMAEDAVDGER-LEEPYLGK-LITQGENCIK-LLWENGNLLR-LSINTPNSR-LVAYYTLIGASGQR-MELKPGDNLNVNFHLR-NTLIIYLEK-NVDGTAFVIFGVQDGDKK-QEALELIK-QIFSAEFEVK-QKPDGVFQEDGPVIHQEMIGGFR-QNEAFSLTAK-QPLTITVR-QPSSAYAAFNNRPPSTWLTAYVVK-QVREPGQDLVVLSLPITPEF…	56;8	56;8	56;8	>sp|P01027|CO3_MOUSE Complement C3 OS=Mus musculus GN=C3 PE=1 SV=3	2	56	56	56	42.3	42.3	42.3	186.48	1663	323.31	28.9	24.2	27.5	24.6	20.7	27.3	26.9	24	14	28.4	28.3	28.6	22.8	19.6	17.3	30.8	18.1	17.9	27.8	26.5	20.4	32.2	39.4	29.6		720;816;1101;1158;1489	495;826;990;1129	P01027	341940525	12266	C3	P01027
629	Complement C4-B OS=Mus musculus GN=C4b PE=1 SV=3;CON__P01030	Complement C4-B OS=Mus musculus GN=C4b PE=1 SV=3	APHIQLVAQSPWLR-ASAGLLGAHAAAITAYALTLTK-FVSSAFSLDLSR-GTGFLSIEPLDPR-GVFDLGDAVSK-ILSLAQEQVGNSPEK-LLVSAGSLYPAIAR-LSSGDDFVLLSLEVPLEDVR-STQDTVVTLDALSAYWIASHTTEEK-TLEIPGSSDPNIVPDGDFSSLVR-DSSTWLTAFVLK	11;1	11;1	10;0	>sp|P01029|CO4B_MOUSE Complement C4-B OS=Mus musculus GN=C4b PE=1 SV=3	2	11	11	10	10.4	10.4	9.7	192.91	1738	75.917	7.7	3.6	6.4	4.3	6.3	6.3	7.5	6.7	6.4	3.7	6.3	4.8	3.7	1.4	5.7	9	6.9	5.6	6.3	9.7	4.3	6.5	9	7.7				P01029	341940526	102643089	C4b	P01029
630	Complement component 1 Q subcomponent-binding protein, mitochondrial OS=Mus musculus GN=C1qbp PE=1 SV=1	Complement component 1 Q subcomponent-binding protein, mitochondrial OS=Mus musculus GN=C1qbp PE=1 SV=1	AFVEFLTDEIKEEK-EVSFQATGDSEWR	2	2	2	>sp|O35658|C1QBP_MOUSE Complement component 1 Q subcomponent-binding protein, mitochondrial OS=Mus musculus GN=C1qbp PE=1 SV=1	1	2	2	2	9.7	9.7	9.7	31.013	278	8.9375	9.7	5	0	0	0	0	0	4.7	9.7	5	5	0	4.7	0	0	0	0	0	5	9.7	4.7	4.7	4.7	0				O35658	3334247	---	C1qbp	O35658
631	Complement component C8 beta chain OS=Mus musculus GN=C8b PE=1 SV=1	Complement component C8 beta chain OS=Mus musculus GN=C8b PE=1 SV=1	GGTSEDITALAYK-LASGINLFTNTFEGPVLDHR	2	2	2	>sp|Q8BH35|CO8B_MOUSE Complement component C8 beta chain OS=Mus musculus GN=C8b PE=1 SV=1	1	2	2	2	5.6	5.6	5.6	66.229	589	3.035	5.6	0	3.4	2.2	2.2	3.4	0	0	0	5.6	0	3.4	2.2	0	0	0	0	0	0	0	0	5.6	2.2	3.4				Q8BH35	61211636	110382	C8b	Q8BH35
632	Complement component C9 OS=Mus musculus GN=C9 PE=1 SV=2	Complement component C9 OS=Mus musculus GN=C9 PE=1 SV=2	DNIIDDVISFIR-KPWNVVSLIYETK	2	2	2	>sp|P06683|CO9_MOUSE Complement component C9 OS=Mus musculus GN=C9 PE=1 SV=2	1	2	2	2	4.6	4.6	4.6	62.002	548	5.906	0	0	0	0	0	2.2	0	0	0	0	0	0	2.2	0	0	2.2	0	0	4.6	4.6	0	0	2.2	0				P06683	20141173	12279	C9	P06683
633	Complement component receptor 1-like protein OS=Mus musculus GN=Cr1l PE=1 SV=1	Complement component receptor 1-like protein OS=Mus musculus GN=Cr1l PE=1 SV=1	LQSLLTSQENSSTTSPAR-TPSDPENGLVHVHTGIQFGSR	2	2	2	>sp|Q64735|CR1L_MOUSE Complement component receptor 1-like protein OS=Mus musculus GN=Cr1l PE=1 SV=1	1	2	2	2	8.1	8.1	8.1	53.762	483	3.9304	8.1	3.7	0	4.3	3.7	8.1	8.1	8.1	4.3	3.7	3.7	8.1	8.1	3.7	0	4.3	8.1	3.7	8.1	8.1	3.7	3.7	8.1	8.1				Q64735	81872180	12946	Cr1l	Q64735
634	Complement factor B OS=Mus musculus GN=Cfb PE=1 SV=2	Complement factor B OS=Mus musculus GN=Cfb PE=1 SV=2	KAEGIPEFYDYDVALVK-YGLLTYATVPK	2	2	2	>sp|P04186|CFAB_MOUSE Complement factor B OS=Mus musculus GN=Cfb PE=1 SV=2	1	2	2	2	3.7	3.7	3.7	85.004	761	5.7257	3.7	1.4	3.7	3.7	0	1.4	3.7	2.2	0	2.2	2.2	2.2	2.2	2.2	0	2.2	2.2	1.4	3.7	0	0	3.7	3.7	2.2				P04186	116126	---	Cfb	P04186
635	Complement factor H OS=Mus musculus GN=Cfh PE=1 SV=2	Complement factor H OS=Mus musculus GN=Cfh PE=1 SV=2	CTAQGWEPEVPCVR-CTPTGWIPVPR-CVEILCTPPR-ENSEILSGSWSEQLYPEGTQATYK-IVSGAAETDQEYYFGQVVR-LAVGSQFEFGAK-LYYEESLRPNFPVSIGNK-TDCDVLPTVK-TGEQVTFR-VENGDGINVKPVYK-VYVQGQSLK-WIGQPVCK	12	12	12	>sp|P06909|CFAH_MOUSE Complement factor H OS=Mus musculus GN=Cfh PE=1 SV=2	1	12	12	12	12.7	12.7	12.7	139.14	1234	38.687	1.4	5	5	0	4.4	1.4	5.7	4.2	2.5	4.9	8.2	2	7.4	1.4	3.4	8.3	5.5	3.5	2.2	7.8	5.3	7.1	8.7	4.1		205;210;309;374;385;994;1048		P06909	408360014	12628	Cfh	P06909
636	Complement receptor type 2 OS=Mus musculus GN=Cr2 PE=2 SV=1	Complement receptor type 2 OS=Mus musculus GN=Cr2 PE=2 SV=1	EDSYLLNFDPGTSIR-GQILSILK-GVSFTLIGEK-IINGQKEDSYLLNFDPGTSIR-KPYYSLPIVPGTVLR	5	5	5	>sp|P19070|CR2_MOUSE Complement receptor type 2 OS=Mus musculus GN=Cr2 PE=2 SV=1	1	5	5	5	5.3	5.3	5.3	112.99	1025	10.141	3.9	4.3	4.3	3.5	4.5	2.2	5.3	5.3	4.3	1	5.3	3.9	3.2	0	3.5	1	0	0	2.4	3.5	4.5	3.9	3.9	2.9				P19070	117316	---	Cr2	P19070
637	Condensin complex subunit 1 OS=Mus musculus GN=Ncapd2 PE=1 SV=2	Condensin complex subunit 1 OS=Mus musculus GN=Ncapd2 PE=1 SV=2	EAIAHLLGVALVR-EATSHFQESEPFSHTEPEENSFLNLLGLIFK-ELLDGNQVLAAFVPLLLK-FPNLVDPWTPHLYAR-GFAAFLTELAER-GKPEIVGSNLDALVR-GNAIYNLLPDIISR-HSQELSSILDDAALSGSDR-LAQQVCLAIANISDR-VCNNPGLYSNPELCAAASLALGK-VLQLFAR	11	11	11	>sp|Q8K2Z4|CND1_MOUSE Condensin complex subunit 1 OS=Mus musculus GN=Ncapd2 PE=1 SV=2	1	11	11	11	13.1	13.1	13.1	155.66	1392	25.809	3.3	1.9	6.7	3.1	0.9	5.2	3.5	4.6	0.9	4.2	3.4	0.9	0.9	0.9	4.9	13.1	0.9	0.9	2.2	12.6	3.2	1.9	5.5	0.9		806;1012;1024		Q8K2Z4	30172873	68298	Ncapd2	Q8K2Z4
638	Condensin complex subunit 2 OS=Mus musculus GN=Ncaph PE=2 SV=1	Condensin complex subunit 2 OS=Mus musculus GN=Ncaph PE=2 SV=1	GQQDVLSSPLER-VFDLQFSTDSIHLASPNR	2	2	2	>sp|Q8C156|CND2_MOUSE Condensin complex subunit 2 OS=Mus musculus GN=Ncaph PE=2 SV=1	1	2	2	2	4.1	4.1	4.1	82.302	731	6.4051	0	0	0	0	0	0	2.5	0	0	1.6	0	0	0	0	0	1.6	1.6	0	0	4.1	1.6	1.6	0	0				Q8C156	30172806	215387	Ncaph	Q8C156
641	Constitutive coactivator of PPAR-gamma-like protein 1 OS=Mus musculus GN=FAM120A PE=1 SV=2	Constitutive coactivator of PPAR-gamma-like protein 1 OS=Mus musculus GN=FAM120A PE=1 SV=2	GVISTPVIR-LYEPDQLQELK-QNHPLPFPPPPALPFYPASVYPR-RQELDAFLAQALSPK-SPQTPELVEALAFR-SQGAIQGRPPYAASAEEVAK-VEGSSTASSGSQLAEGK-VWFLPPVCMAHCIR	8	8	8	>sp|Q6A0A9|F120A_MOUSE Constitutive coactivator of PPAR-gamma-like protein 1 OS=Mus musculus GN=FAM120A PE=1 SV=2	1	8	8	8	11.1	11.1	11.1	121.64	1112	12.76	1.5	2.8	7.5	6.2	6.9	3.1	8.5	3.9	6.2	4.3	7.7	2.5	3.8	0	2.2	5.7	4.3	0	3.1	7.7	2.3	6.4	7.2	6.5				Q6A0A9	223635230	218236	FAM120A	Q6A0A9
642	COP9 signalosome complex subunit 1 OS=Mus musculus GN=Gps1 PE=1 SV=1	COP9 signalosome complex subunit 1 OS=Mus musculus GN=Gps1 PE=1 SV=1	AESTPEIAEQR-CAAGLAELAAR-DSQTQAILTK-EGSQGELTPANSQSR-ELQNAPDAIPESGVEPPPLDTAWVEATR-LQFIADR-SPPREGSQGELTPANSQSR-VSVYLQNWSHVLSYVSK	8	8	8	>sp|Q99LD4|CSN1_MOUSE COP9 signalosome complex subunit 1 OS=Mus musculus GN=Gps1 PE=1 SV=1	1	8	8	8	21.9	21.9	21.9	53.442	471	12.494	16.6	6.8	1.5	13	7.2	19.5	13.6	9.1	11.9	7	10.4	15.1	0	0	6.8	14	5.3	4.7	5.5	12.1	15.9	5.5	10.4	16.3		231		Q99LD4	47116574	---	Gps1	Q99LD4
643	COP9 signalosome complex subunit 2 OS=Mus musculus GN=Cops2 PE=1 SV=1	COP9 signalosome complex subunit 2 OS=Mus musculus GN=Cops2 PE=1 SV=1	QMDLLQEFYETTLEALKDAK-SINSILDYISTSK-VLELEGEKGEWGFK-YTALDKWTNQLNSLNQAVVSK	4	4	4	>sp|P61202|CSN2_MOUSE COP9 signalosome complex subunit 2 OS=Mus musculus GN=Cops2 PE=1 SV=1	1	4	4	4	15.3	15.3	15.3	51.596	443	27.714	7.7	4.7	7.9	7.7	7.7	12.4	6.1	7.7	10.8	7.7	7.7	4.7	7.7	0	7.7	7.7	0	7.7	2.9	10.6	2.9	7.7	9.3	7.7				P61202	47117682	12848	Cops2	P61202
644	COP9 signalosome complex subunit 3 OS=Mus musculus GN=Cops3 PE=1 SV=3	COP9 signalosome complex subunit 3 OS=Mus musculus GN=Cops3 PE=1 SV=3	CIELDER-FIKPLSNAYHELAQVYSTNNPSELR-VQLSGPQEAEK-YTSQIVGR	4	4	4	>sp|O88543|CSN3_MOUSE COP9 signalosome complex subunit 3 OS=Mus musculus GN=Cops3 PE=1 SV=3	1	4	4	4	12.1	12.1	12.1	47.832	423	7.3223	10.4	10.4	0	10.4	4.5	10.4	4.5	10.2	10.4	10.4	7.6	8.5	4.5	0	2.6	7.8	0	7.8	6.1	8.5	0	1.9	6.1	1.9		383		O88543	55976220	26572	Cops3	O88543
645	COP9 signalosome complex subunit 4 OS=Mus musculus GN=Cops4 PE=1 SV=1	COP9 signalosome complex subunit 4 OS=Mus musculus GN=Cops4 PE=1 SV=1	AIQLSGTEQLEALK-ASLLQNESTNEQLQIHYK-ATTADGSSILDR-AVIEHNLLSASK-CQQLAAYGILEK-EALPTWDK-LYLEDDDPVQAEAYINR-LYNNITFEELGALLEIPAAK-NAAQVLVGIPLETGQK-QYNVDYKLETYLK-VISFEEQVASIR-YNELSYK	12	12	12	>sp|O88544|CSN4_MOUSE COP9 signalosome complex subunit 4 OS=Mus musculus GN=Cops4 PE=1 SV=1	1	12	12	12	39.7	39.7	39.7	46.284	406	72.019	32.8	37.7	23.4	23.2	31.8	27.3	30	34.2	30.8	33	26.6	31.5	22.2	16.3	28.8	32	0	29.8	23.4	36	11.1	23.9	29.8	11.8		255		O88544	55976221	26891	Cops4	O88544
646	COP9 signalosome complex subunit 5 OS=Mus musculus GN=Cops5 PE=1 SV=3	COP9 signalosome complex subunit 5 OS=Mus musculus GN=Cops5 PE=1 SV=3	GYKPPDEGPSEYQTIPLNK-ISALALLK-LEQSEAQLGR-LFNQINVA-LLELLWNK-QQQEILAAKPWTK-QYYALEVSYFK-VNAQAAAYEYMAAYIENAK-VNLGAFR-YWVNTLSSSSLLTNADYTTGQVFDLSEK	10	10	10	>sp|O35864|CSN5_MOUSE COP9 signalosome complex subunit 5 OS=Mus musculus GN=Cops5 PE=1 SV=3	1	10	10	10	39.2	39.2	39.2	37.548	334	36.708	35.3	32	19.5	17.4	35.3	21.6	21.9	21.3	17.4	15.9	39.2	27.5	5.4	11.1	24.3	21.9	0	19.2	12.9	29	2.4	20.7	35.3	2.4				O35864	55976214	26754	Cops5	O35864
647	COP9 signalosome complex subunit 6 OS=Mus musculus GN=Cops6 PE=1 SV=1	COP9 signalosome complex subunit 6 OS=Mus musculus GN=Cops6 PE=1 SV=1	ASEAGEVPFNHEILR-FNVLYDR-NIEVMNSFELLSHTVEEK-QVCEIIESPLFLK	4	4	4	>sp|O88545|CSN6_MOUSE COP9 signalosome complex subunit 6 OS=Mus musculus GN=Cops6 PE=1 SV=1	1	4	4	4	16.4	16.4	16.4	35.88	324	19.915	11.7	6.8	10.8	6.8	12.3	6.8	10.8	6.8	16.4	6.8	10.8	6.8	6.8	6.8	6.8	7.7	2.2	10.8	10.8	16.4	4.6	6.8	2.2	2.2		140		O88545	55976222	26893	Cops6	O88545
648	COP9 signalosome complex subunit 7a OS=Mus musculus GN=Cops7a PE=1 SV=2	COP9 signalosome complex subunit 7a OS=Mus musculus GN=Cops7a PE=1 SV=2	ELAESDFASTFR-NLPPLTDAQK-QQIESEVANLKK-VTGQNQEQFLLLAK	4	4	4	>sp|Q9CZ04|CSN7A_MOUSE COP9 signalosome complex subunit 7a OS=Mus musculus GN=Cops7a PE=1 SV=2	1	4	4	4	17.5	17.5	17.5	30.224	275	7.7717	17.5	13.1	8.7	13.1	17.5	17.5	0	8.7	13.1	17.5	5.1	17.5	17.5	17.5	8.7	13.1	17.5	9.5	13.1	13.1	17.5	17.5	17.5	17.5				Q9CZ04	55976587	26894	Cops7a	Q9CZ04
649	COP9 signalosome complex subunit 8 OS=Mus musculus GN=Cops8 PE=1 SV=1	COP9 signalosome complex subunit 8 OS=Mus musculus GN=Cops8 PE=1 SV=1	FIPLSEPAPVPPIPNEQQLAR-GVLEQGWQADSTTR-KPASGTLDVSLNR-LTDYVAFLEN-SANSELGGIWSVGQR	5	5	5	>sp|Q8VBV7|CSN8_MOUSE COP9 signalosome complex subunit 8 OS=Mus musculus GN=Cops8 PE=1 SV=1	1	5	5	5	34.9	34.9	34.9	23.255	209	23.821	27.8	28.7	23.9	27.8	23.4	27.8	34.9	27.8	27.8	16.3	11	16.7	23.4	23.4	23	6.7	16.7	21.1	30.1	30.1	27.8	23	23.9	23.9				Q8VBV7	55976546	108679	Cops8	Q8VBV7
650	Copine-1 OS=Mus musculus GN=Cpne1 PE=1 SV=1	Copine-1 OS=Mus musculus GN=Cpne1 PE=1 SV=1	DIVQFVPYR-DIVQFVPYRR-ETLAQTVLAEVPTQMVSYFR-FSVSLQHFCGGDLSTPIQVR-GTITVSAQELK-LYGPTNFAPIINHVAR-NNLNPTWK-QALPQVR-SASQYFVLLLLTDGAVTDVEATCK-SDPFLEFFR-SDPLCVLLQDVGGAWAELCR-FGIYDIDNK	12	12	11	>sp|Q8C166|CPNE1_MOUSE Copine-1 OS=Mus musculus GN=Cpne1 PE=1 SV=1	1	12	12	11	28.7	28.7	27.1	58.886	536	195.81	14	11.6	8.6	13.1	10.1	19	19	11.6	15.3	13.2	7.6	9.7	14.6	1.7	6.5	10.1	11	9.3	9.7	21.6	9.1	7.8	14.7	16.8		30;44;199;431		Q8C166	32363144	266692	Cpne1	Q8C166
651	Copine-2 OS=Mus musculus GN=Cpne2 PE=2 SV=1; Copine-9 OS=Mus musculus GN=Cpne9 PE=2 SV=1; Copine-7 OS=Mus musculus GN=Cpne7 PE=2 SV=1; Copine-6 OS=Mus musculus GN=Cpne6 PE=2 SV=1; Copine-4 OS=Mus musculus GN=Cpne4 PE=1 SV=1; Copine-8 OS=Mus musculus GN=Cpne8 PE=2 SV=3; Copine-5 OS=Mus musculus GN=Cpne5 PE=2 SV=1	Copine-2 OS=Mus musculus GN=Cpne2 PE=2 SV=1; Copine-9 OS=Mus musculus GN=Cpne9 PE=2 SV=1; Copine-7 OS=Mus musculus GN=Cpne7 PE=2 SV=1; Copine-6 OS=Mus musculus GN=Cpne6 PE=2 SV=1; Copine-4 OS=Mus musculus GN=Cpne4 PE=1 SV=1; Copine-8 OS=Mus musculus GN=Cpne8 PE=2 SV=3; Copine-5 OS=Mus musculus GN=Cpne5 PE=2 SV=1	AVLAELPQQVVQYFK	2;1;1;1;1;1;1	1;0;0;0;0;0;0	1;0;0;0;0;0;0	>sp|P59108|CPNE2_MOUSE Copine-2 OS=Mus musculus GN=Cpne2 PE=2 SV=1;>sp|Q1RLL3|CPNE9_MOUSE Copine-9 OS=Mus musculus GN=Cpne9 PE=2 SV=1;>sp|Q0VE82|CPNE7_MOUSE Copine-7 OS=Mus musculus GN=Cpne7 PE=2 SV=1;>sp|Q9Z140|CPNE6_MOUSE Copine-6 OS=Mus musculus GN=Cpne	7	2	1	1	4.4	2.7	2.7	61.035	548	5.7424	1.6	1.6	1.6	1.6	1.6	4.4	1.6	4.4	1.6	4.4	1.6	1.6	4.4	1.6	1.6	1.6	4.4	1.6	1.6	4.4	4.4	4.4	1.6	1.6				P59108	26006700	234577	Cpne2	P59108
652	Copine-3 OS=Mus musculus GN=Cpne3 PE=2 SV=2	Copine-3 OS=Mus musculus GN=Cpne3 PE=2 SV=2	DIVQFVPFR-APSGEVAIR-EALAQCVLAEIPQQVVGYFNTYK-GSITISAEEIKDNR-LYGPTNFSPIINHVAR-TCLPQIR	7	6	5	>sp|Q8BT60|CPNE3_MOUSE Copine-3 OS=Mus musculus GN=Cpne3 PE=2 SV=2	1	7	6	5	16.3	14.6	12.9	59.584	533	60.16	1.7	6	7.3	6	6	6	6	6	7.3	9	9	7.7	6	1.7	1.7	3.4	6	6	7.3	8.6	6	4.3	6	10.3		385;506		Q8BT60	67476974	70568	Cpne3	Q8BT60
653	Copper chaperone for superoxide dismutase OS=Mus musculus GN=Ccs PE=2 SV=1	Copper chaperone for superoxide dismutase OS=Mus musculus GN=Ccs PE=2 SV=1	SAGLFQNPK-SLVIDEGEDDLGR	2	2	2	>sp|Q9WU84|CCS_MOUSE Copper chaperone for superoxide dismutase OS=Mus musculus GN=Ccs PE=2 SV=1	1	2	2	2	8	8	8	28.911	274	3.7188	0	0	4.7	4.7	4.7	4.7	0	3.3	4.7	8	8	4.7	4.7	0	4.7	0	4.7	4.7	0	8	3.3	4.7	4.7	4.7				Q9WU84	20137672	12460	Ccs	Q9WU84
654	Core histone macro-H2A.1 OS=Mus musculus GN=H2afy PE=1 SV=3; Core histone macro-H2A.2 OS=Mus musculus GN=H2afy2 PE=1 SV=3	Core histone macro-H2A.1 OS=Mus musculus GN=H2afy PE=1 SV=3	AASADSTTEGTPTDGFTVLSTK-EFVEAVLELR-GGKEFVEAVLELR-GKLEAIITPPPAK-GVTIASGGVLPNIHPELLAK-NGPLEVAGAAISAGHGLPAK-QTAAQLILK-SIAFPSIGSGR-SLFLGQK-AGVIFPVGR-HILLAVANDEELNQLLK	11;2	11;2	11;2	>sp|Q9QZQ8|H2AY_MOUSE Core histone macro-H2A.1 OS=Mus musculus GN=H2afy PE=1 SV=3	2	11	11	11	37.9	37.9	37.9	39.735	372	153.1	28.5	29	24.5	29	20.2	19.1	16.7	23.7	29.8	24.7	24.7	32.5	34.4	19.4	22	24.2	10.8	29	21.8	16.7	27.2	29	21	19.1				Q9QZQ8	81869559	26914	H2afy	Q9QZQ8
655	Core-binding factor subunit beta OS=Mus musculus GN=Cbfb PE=1 SV=1	Core-binding factor subunit beta OS=Mus musculus GN=Cbfb PE=1 SV=1	AQQEDALAQQAFEEAR-EYVDLER-RQQDPSPGSNLGGGDDLK	3	3	3	>sp|Q08024|PEBB_MOUSE Core-binding factor subunit beta OS=Mus musculus GN=Cbfb PE=1 SV=1	1	3	3	3	21.9	21.9	21.9	22.03	187	7.2884	21.9	12.3	12.3	12.3	12.3	3.7	12.3	12.3	12.3	12.3	12.3	12.3	3.7	3.7	3.7	3.7	12.3	3.7	12.3	12.3	12.3	12.3	12.3	12.3				Q08024	2498754	12400	Cbfb	Q08024
656	Coronin-1A OS=Mus musculus GN=Coro1a PE=1 SV=5	Coronin-1A OS=Mus musculus GN=Coro1a PE=1 SV=5	ADQCYEDVR-ATPEPSGTPSSDTVSR-ATPEPSGTPSSDTVSRLEEDVR-DAGPLLISLK-DGALICTSCR-DGYVPPK-DRPHEGTRPVHAVFVSEGK-EPVITLEGHTK-GLEVNKCEIAR-HLEEPLSLQELDTSSGVLLPFFDPDTNIVYLCGK-ILTTGFSR-KCEPIAMTVPR-KSDLFQEDLYPPTAGPDPALTAEEWLGGR-LDRLEETVQAK-LEETVQAK-NLNAIVQK-QVALWDTK-RATPEPSGTPSSDTVSR-SDLFQEDLYPPTAGPDPALTAEEWLGGR-VSQTTWDSGFCAVNPK-YFEITSEAPFLHYLSMFSSK	21	21	21	>sp|O89053|COR1A_MOUSE Coronin-1A OS=Mus musculus GN=Coro1a PE=1 SV=5	1	21	21	21	53.1	53.1	53.1	50.989	461	323.31	49.2	36.9	31.2	47.5	41.9	43.2	45.1	46.2	40.1	35.4	45.1	40.8	33.4	31	26.9	41.4	32.8	33.4	36.4	44.9	33.4	26.9	47.9	49.2		24;40;192;195;285;332;345	309;350	O89053	46397808	12721	Coro1a	O89053
657	Coronin-1B OS=Mus musculus GN=Coro1b PE=1 SV=1	Coronin-1B OS=Mus musculus GN=Coro1b PE=1 SV=1	AIFLADGK-KSDLFQDDLYPDTAGPEAALEAEDWVSGQDANPILISLR-LDSLHPDLIYNVSWNHNGSLFCSACK-LEEQLGR-NVLSDSRPASYSR-SGASTATAVTDVPSGNLAGAGEAGK-SGASTATAVTDVPSGNLAGAGEAGKLEEVMQELR-VFTTGFSR-VGIITWHPTAR-VTWDSTFCAVNPK-YFEITDEPPYIHFLNTFTSK	11	11	11	>sp|Q9WUM3|COR1B_MOUSE Coronin-1B OS=Mus musculus GN=Coro1b PE=1 SV=1	1	11	11	11	37	37	37	53.912	484	139.51	29.3	13.2	14.7	14.7	23.6	24	29.8	20.9	24.6	12.4	8.3	20.9	16.1	14.5	23.8	26.7	15.5	14.5	18	30	15.1	16.9	34.3	28.9		41;192;195		Q9WUM3	12229769	23789	Coro1b	Q9WUM3
658	Coronin-1C OS=Mus musculus GN=Coro1c PE=1 SV=2	Coronin-1C OS=Mus musculus GN=Coro1c PE=1 SV=2	AIFLADGNVFTTGFSR-KPTDTASVQNEAK-KPTDTASVQNEAKLDEILK-KSDLFQDDLYPDTAGPEAALEAEEWFEGK-NADPILISLK-NDQCYDDIR-QLALWNPK-VGIVAWHPTAR-VTWDSSFCAVNPR-YFEITDESPYVHYLNTFSSK	10	10	10	>sp|Q9WUM4|COR1C_MOUSE Coronin-1C OS=Mus musculus GN=Coro1c PE=1 SV=2	1	10	10	10	28.5	28.5	28.5	53.12	474	205.19	22.6	12.2	12	13.7	19.8	18.1	22.6	12	17.7	22.6	24.5	22.6	6.1	3.8	16.5	19.8	7.4	16.5	13.7	23.8	18.4	19.8	19.8	23.6		23;39		Q9WUM4	54041071	23790	Coro1c	Q9WUM4
659	Coronin-7 OS=Mus musculus GN=Coro7 PE=2 SV=2	Coronin-7 OS=Mus musculus GN=Coro7 PE=2 SV=2	AWFEGANGQPR-EAWISDIR-EFFQDDVFPDTAVTWEPALSAK-GENQLYCYEVTPQQPALSPVTQCILENVLR-IWDLQTGAER-LAVAGEDAR-LAWTGIQEHLVSTGFNQMR-LQGHQDQIFSLAWSPDGK-LSGTGEALPSVPGVVLGPEELPVEVLQFHPTVDGVLVSTAGK-QTSLEPVAFR-RAPSSAQYLEEK-SLQSLLGPSSK-SSPLPLQEGPGPEGGR-TECDIQDVEFAR-VAVPLLSSGGQVAVLELQKPGR-VPPGGLENVLTTPETVLTGHTEK	16	16	16	>sp|Q9D2V7|CORO7_MOUSE Coronin-7 OS=Mus musculus GN=Coro7 PE=2 SV=2	1	16	16	16	29.8	29.8	29.8	100.81	922	71.635	17.5	14.6	14	14.1	18.8	14.2	18.9	15.2	8.5	12.7	10.5	11.9	7.5	6.6	8.4	15.5	6.2	12	10	19.5	10.7	8.4	16.2	12.8		287;303;787		Q9D2V7	61221223	78885	Coro7	Q9D2V7
660	Corticosteroid 11-beta-dehydrogenase isozyme 1 OS=Mus musculus GN=Hsd11b1 PE=1 SV=3	Corticosteroid 11-beta-dehydrogenase isozyme 1 OS=Mus musculus GN=Hsd11b1 PE=1 SV=3	EISGIINAQASPK-FALDGFFSTIR-SEVYYDKSPLTPILLGNPGR-SPLTPILLGNPGR-SPLTPILLGNPGRK-TELYITK	6	6	6	>sp|P50172|DHI1_MOUSE Corticosteroid 11-beta-dehydrogenase isozyme 1 OS=Mus musculus GN=Hsd11b1 PE=1 SV=3	1	6	6	6	17.8	17.8	17.8	32.364	292	31.7	15.1	15.1	13.7	17.5	10.6	15.1	6.8	17.8	8.2	17.5	17.8	17.8	8.6	8.2	15.1	17.5	15.4	11	10.6	13.4	10.6	15.1	13.4	15.1				P50172	1706408	15483	Hsd11b1	P50172
661	Costars family protein ABRACL OS=Mus musculus GN=Abracl PE=3 SV=1	Costars family protein ABRACL OS=Mus musculus GN=Abracl PE=3 SV=1	CANLFEALVGTLK-FGVLFQDDR	2	2	2	>sp|Q4KML4|ABRAL_MOUSE Costars family protein ABRACL OS=Mus musculus GN=Abracl PE=3 SV=1	1	2	2	2	27.2	27.2	27.2	9.0303	81	32.168	27.2	27.2	27.2	27.2	27.2	27.2	27.2	11.1	27.2	27.2	27.2	27.2	27.2	27.2	27.2	11.1	27.2	27.2	27.2	27.2	27.2	27.2	27.2	27.2		39		Q4KML4	123797686	73112	Abracl	Q4KML4
663	C-reactive protein OS=Mus musculus GN=Crp PE=2 SV=2	C-reactive protein OS=Mus musculus GN=Crp PE=2 SV=2	AQGDVFIKPQLWS-SFSVFSYATK	2	2	2	>sp|P14847|CRP_MOUSE C-reactive protein OS=Mus musculus GN=Crp PE=2 SV=2	1	2	2	2	10.2	10.2	10.2	25.36	225	3.2773	0	4.4	4.4	0	4.4	0	0	4.4	0	4.4	4.4	0	0	0	0	0	0	0	4.4	4.4	0	10.2	4.4	4.4				P14847	408360035	12944	Crp	P14847
664	Creatine kinase B-type OS=Mus musculus GN=Ckb PE=1 SV=1	Creatine kinase B-type OS=Mus musculus GN=Ckb PE=1 SV=1	DLFDPIIEER-FCTGLTQIETLFK-GTGGVDTAAVGGVFDVSNADR-HGGYQPSDEHKTDLNPDNLQGGDDLDPNYVLSSR-LAVEALSSLDGDLSGR-LEQGQAIDDLMPAQK-LGFSEVELVQMVVDGVK-LLIEMEQR-NYEFMWNPHLGYILTCPSNLGTGLR-RGTGGVDTAAVGGVFDVSNADR-SMTEAEQQQLIDDHFLFDKPVSPLLLASGMAR-TDLNPDNLQGGDDLDPNYVLSSR-TFLVWINEEDHLR-VLTPELYAELR	14	14	14	>sp|Q04447|KCRB_MOUSE Creatine kinase B-type OS=Mus musculus GN=Ckb PE=1 SV=1	1	14	14	14	56.7	56.7	56.7	42.713	381	270.67	39.1	28.3	24.1	35.7	34.1	35.7	35.7	37.8	41.7	39.6	48	32.3	22.6	10.5	31	31.8	5.5	13.1	30.7	56.7	29.9	26.8	42.3	30.2		254;283	272;352;363;377	Q04447	417208	12709	Ckb	Q04447
665	Crk-like protein OS=Mus musculus GN=Crkl PE=1 SV=2	Crk-like protein OS=Mus musculus GN=Crkl PE=1 SV=2	IGDQEFDHLPALLEFYK-IHYLDTTTLIEPAPR-TALALEVGDIVK-VSHYIINSLPNR-YPSPPVGSVSAPNLPTAEENLEYVR	5	5	5	>sp|P47941|CRKL_MOUSE Crk-like protein OS=Mus musculus GN=Crkl PE=1 SV=2	1	5	5	5	26.7	26.7	26.7	33.83	303	25.469	26.7	26.7	22.8	21.1	21.8	26.7	22.8	26.7	21.1	14.5	17.8	26.7	14.5	5	16.2	26.7	5	18.8	22.8	17.8	9.6	22.8	21.8	4				P47941	78099966	12929	Crkl	P47941
667	C-terminal-binding protein 1 OS=Mus musculus GN=Ctbp1 PE=1 SV=2	C-terminal-binding protein 1 OS=Mus musculus GN=Ctbp1 PE=1 SV=2	AFGFNVLFYDPYLSDGIER-GAALDVHESEPFSFSQGPLK-IGSGFDNIDIK-IRGETLGIIGLGR-QGAFLVNTAR-VGQAVALR-VQSVEQIR	7	7	6	>sp|O88712|CTBP1_MOUSE C-terminal-binding protein 1 OS=Mus musculus GN=Ctbp1 PE=1 SV=2	1	7	7	6	20.2	20.2	18.4	47.744	441	21.55	20.2	10.7	15.9	15.4	14.3	9.1	14.1	8.8	12.5	17.9	11.1	8.8	13.6	1.8	9.3	11.8	7.3	7.5	6.6	13.6	7	15.9	11.8	10.7				O88712	146345407	13016	Ctbp1	O88712
668	C-terminal-binding protein 2 OS=Mus musculus GN=Ctbp2 PE=1 SV=2	C-terminal-binding protein 2 OS=Mus musculus GN=Ctbp2 PE=1 SV=2	DLATVAFCDAQSTQEIHEK-EFFVTSAPWSVIDQQAIHPELNGATYR-GAALDVHESEPFSFAQGPLK	4	3	3	>sp|P56546|CTBP2_MOUSE C-terminal-binding protein 2 OS=Mus musculus GN=Ctbp2 PE=1 SV=2	1	4	3	3	16.6	14.8	14.8	48.956	445	6.0631	1.8	4.5	8.8	12.4	4.5	10.6	0	6.3	6.3	1.8	6.3	10.6	1.8	0	4.5	0	1.8	0	0	6.1	4.5	1.8	1.8	4.5				P56546	12644331	13017	Ctbp2	P56546
669	CTP synthase 1 OS=Mus musculus GN=Ctps1 PE=1 SV=2	CTP synthase 1 OS=Mus musculus GN=Ctps1 PE=1 SV=2	FSDSYASVIK-VPLLLEEQGVVDYFLR-YILVTGGVISGIGK	3	3	2	>sp|P70698|PYRG1_MOUSE CTP synthase 1 OS=Mus musculus GN=Ctps1 PE=1 SV=2	1	3	3	2	6.8	6.8	4.4	66.682	591	13.807	5.1	0	2.4	5.1	4.1	5.1	5.1	5.1	0	2.4	0	5.1	2.4	0	2.4	5.1	5.1	0	5.1	2.7	2.4	5.1	5.1	2.4				P70698	110825737	51797	Ctps1	P70698
670	CTP synthase 2 OS=Mus musculus GN=Ctps2 PE=2 SV=1	CTP synthase 2 OS=Mus musculus GN=Ctps2 PE=2 SV=1	LCLADGILVPGGFGIR	2	1	1	>sp|P70303|PYRG2_MOUSE CTP synthase 2 OS=Mus musculus GN=Ctps2 PE=2 SV=1	1	2	1	1	5.1	2.7	2.7	65.514	586	9.1013	2.4	0	2.4	5.1	2.4	2.4	5.1	5.1	0	5.1	0	2.4	2.4	0	5.1	2.4	2.4	0	2.4	2.7	2.4	2.4	5.1	2.4		362		P70303	81882207	55936	Ctps2	P70303
671	C-type lectin domain family 1 member B OS=Mus musculus GN=Clec1b PE=1 SV=1	C-type lectin domain family 1 member B OS=Mus musculus GN=Clec1b PE=1 SV=1	TASQSTLDYIAER-YLLAEKENLSATLQQLAK	2	2	2	>sp|Q9JL99|CLC1B_MOUSE C-type lectin domain family 1 member B OS=Mus musculus GN=Clec1b PE=1 SV=1	1	2	2	2	13.5	13.5	13.5	26.239	229	6.6977	0	0	5.7	13.5	5.7	5.7	5.7	5.7	13.5	7.9	13.5	5.7	7.9	5.7	0	5.7	0	13.5	5.7	13.5	13.5	0	5.7	13.5				Q9JL99	81906770	56760	Clec1b	Q9JL99
673	CUGBP Elav-like family member 2 OS=Mus musculus GN=Celf2 PE=1 SV=1	CUGBP Elav-like family member 2 OS=Mus musculus GN=Celf2 PE=1 SV=1	ELFEPYGAVYQINVLR-ELKELFEPYGAVYQINVLR-MFVGQIPR	3	3	3	>sp|Q9Z0H4|CELF2_MOUSE CUGBP Elav-like family member 2 OS=Mus musculus GN=Celf2 PE=1 SV=1	1	3	3	3	5.3	5.3	5.3	54.27	508	32.261	3.7	1.6	3.7	3.7	3.7	3.7	5.3	3.7	5.3	3.7	3.7	3.7	0	0	3.7	3.7	1.6	3.1	3.7	3.7	3.1	3.1	3.7	3.7			42	Q9Z0H4	81917931	14007	Celf2	Q9Z0H4
674	Cullin-1 OS=Mus musculus GN=Cul1 PE=1 SV=1	Cullin-1 OS=Mus musculus GN=Cul1 PE=1 SV=1	ESFESQFLADTER-HQQLLGEVLTQLSSR-LLIQAAIVR-MDILAQVLQILLK-QIGLDQIWDDLR	5	5	5	>sp|Q9WTX6|CUL1_MOUSE Cullin-1 OS=Mus musculus GN=Cul1 PE=1 SV=1	1	5	5	5	8	8	8	89.69	776	10.918	1.2	0	4.8	1.9	0	3.1	4.5	4.5	3.1	0	0	0	0	0	1.7	3.6	1.9	0	0	4.4	3.1	1.9	2.8	3.6			633	Q9WTX6	13124104	26965	Cul1	Q9WTX6
675	Cullin-2 OS=Mus musculus GN=Cul2 PE=1 SV=2	Cullin-2 OS=Mus musculus GN=Cul2 PE=1 SV=2	FSDIYALCVAYPEPLGER-YLNTQYIK	2	2	2	>sp|Q9D4H8|CUL2_MOUSE Cullin-2 OS=Mus musculus GN=Cul2 PE=1 SV=2	1	2	2	2	3.5	3.5	3.5	86.876	745	14.352	0	0	0	0	0	0	0	0	0	0	0	0	0	0	0	1.1	0	0	1.1	3.5	0	1.1	0	0		46		Q9D4H8	38257755	71745	Cul2	Q9D4H8
676	Cullin-3 OS=Mus musculus GN=Cul3 PE=1 SV=1	Cullin-3 OS=Mus musculus GN=Cul3 PE=1 SV=1	ALVSEEGEGKNPVDYIQGLLDLK-FLPSPVVIK-GLTEQEVETILDK-IEGLIER-SPEYLSLFIDDK-VLTTGYWPTQSATPK-VYVQQNNVENVYNLGLIIFR-YVNSIWDLLK	8	8	8	>sp|Q9JLV5|CUL3_MOUSE Cullin-3 OS=Mus musculus GN=Cul3 PE=1 SV=1	1	8	8	8	14.2	14.2	14.2	88.947	768	15.066	4.9	4.2	5.1	3	5.3	7.6	7.3	2.7	5.7	2.9	0	4	1.3	6.5	0	8.2	5.5	0	3.6	7.9	3.1	2	9.5	6.6				Q9JLV5	13124074	26554	Cul3	Q9JLV5
677	Cullin-associated NEDD8-dissociated protein 1 OS=Mus musculus GN=Cand1 PE=2 SV=2	Cullin-associated NEDD8-dissociated protein 1 OS=Mus musculus GN=Cand1 PE=2 SV=2	AADIDQEVK-AADIDQEVKER-ALTLIAGSPLK-AVAALLTIPEAEK-CLDAVVSTR-DISSIGLK-DLLDSVLPHLYNETK-EGPAVVGQFIQDVK-FTISDHPQPIDPLLK-GYLISGSSYAR-IDLRPVLGEGVPILASFLR-ISGSILNELIGLVR-ITSEALLVTQQLVK-LGTLSALDILIK-LLEDKNGEVQNLAVK-LTLIDPETLLPR-NGEVQNLAVK-QSYYSIAK-SAASYALGSISVGNLPEYLPFVLQEITSQPK-SVILEAFSSPSEEVK-TLEDPDLNVR-TVSPALIAR-TYIQCIAAISR-VIRPLDQPSSFDATPYIK	24	24	23	>sp|Q6ZQ38|CAND1_MOUSE Cullin-associated NEDD8-dissociated protein 1 OS=Mus musculus GN=Cand1 PE=2 SV=2	1	24	24	23	24	24	23.3	136.33	1230	157.69	20.1	13.3	15	15.4	18.9	16.7	17.3	17.3	15.4	18	17.2	16.4	14.8	13	15	19.6	13.2	15.9	10.9	21.7	15	17.3	20.5	17.6		237		Q6ZQ38	67460489	71902	Cand1	Q6ZQ38
678	CWF19-like protein 1 OS=Mus musculus GN=Cwf19l1 PE=2 SV=2	CWF19-like protein 1 OS=Mus musculus GN=Cwf19l1 PE=2 SV=2	EVLASEAILNIPEK-GVDILLTSPWPK	2	2	2	>sp|Q8CI33|C19L1_MOUSE CWF19-like protein 1 OS=Mus musculus GN=Cwf19l1 PE=2 SV=2	1	2	2	2	4.8	4.8	4.8	60.193	537	3.7128	2.2	0	2.6	2.6	0	2.6	0	2.6	2.6	0	0	2.6	4.8	0	0	0	0	0	2.6	2.6	0	2.2	0	0				Q8CI33	341940295	72502	Cwf19l1	Q8CI33
679	Cyclic AMP-responsive element-binding protein 1 OS=Mus musculus GN=Creb1 PE=1 SV=1; Cyclic AMP-dependent transcription factor ATF-1 OS=Mus musculus GN=Atf1 PE=1 SV=1	Cyclic AMP-responsive element-binding protein 1 OS=Mus musculus GN=Creb1 PE=1 SV=1; Cyclic AMP-dependent transcription factor ATF-1 OS=Mus musculus GN=Atf1 PE=1 SV=1	ILNDLSSDAPGVPR-TLIEELK	2;1	2;1	2;1	>sp|Q01147|CREB1_MOUSE Cyclic AMP-responsive element-binding protein 1 OS=Mus musculus GN=Creb1 PE=1 SV=1;>sp|P81269|ATF1_MOUSE Cyclic AMP-dependent transcription factor ATF-1 OS=Mus musculus GN=Atf1 PE=1 SV=1	2	2	2	2	6.2	6.2	6.2	36.674	341	5.431	4.1	4.1	4.1	4.1	4.1	4.1	4.1	4.1	4.1	4.1	4.1	4.1	6.2	0	4.1	0	0	0	0	4.1	4.1	4.1	4.1	4.1				Q01147	544097	12912	Creb1	Q01147
680	Cyclin-dependent kinase 1 OS=Mus musculus GN=Cdk1 PE=1 SV=3; Cyclin-dependent kinase 9 OS=Mus musculus GN=Cdk9 PE=1 SV=1; Cyclin-dependent kinase 15 OS=Mus musculus GN=Cdk15 PE=2 SV=2; Cyclin-dependent kinase 18 OS=Mus musculus GN=Cdk18 PE=1 SV=1; Cyclin-dependent kinase 14 OS=Mus musculus GN=Cdk14 PE=2 SV=2; Cyclin-dependent kinase 16 OS=Mus musculus GN=Cdk16 PE=1 SV=1; Cyclin-dependent kinase 1…	Cyclin-dependent kinase 1 OS=Mus musculus GN=Cdk1 PE=1 SV=3	AFGIPIR-ALGTPNNEVWPEVESLQDYK-IRLESEEEGVPSTAIR-KPLFHGDSEIDQLFR-LESEEEGVPSTAIR-NLDENGLDLLSK-SPEVLLGSAR-YSTPVDIWSIGTIFAELATK-IGEGTYGVVYK-LADFGLAR	10;1;1;1;1;1;1;1;1	10;1;1;1;1;1;1;1;1	8;0;0;0;0;0;0;0;0	>sp|P11440|CDK1_MOUSE Cyclin-dependent kinase 1 OS=Mus musculus GN=Cdk1 PE=1 SV=3	9	10	10	8	40.1	40.1	33.7	34.106	297	26.833	6.1	13.8	13.8	22.9	19.2	18.5	2.7	7.4	9.8	21.5	10.1	22.9	16.2	5.1	18.5	31	25.9	8.8	13.8	33.3	9.8	13.8	8.4	12.5				P11440	115925	12534	Cdk1	P11440
681	Cyclin-dependent kinase 2 OS=Mus musculus GN=Cdk2 PE=1 SV=2; Cyclin-dependent kinase 3 OS=Mus musculus GN=Cdk3 PE=1 SV=2	Cyclin-dependent kinase 2 OS=Mus musculus GN=Cdk2 PE=1 SV=2; Cyclin-dependent kinase 3 OS=Mus musculus GN=Cdk3 PE=1 SV=2	DLKPQNLLINAEGSIK-DLKPQNLLINAEGSIKLADFGLAR-LDTETEGVPSTAIR-ALFPGDSEIDQLFR	6;3	4;1	4;1	>sp|P97377|CDK2_MOUSE Cyclin-dependent kinase 2 OS=Mus musculus GN=Cdk2 PE=1 SV=2;>sp|Q80YP0|CDK3_MOUSE Cyclin-dependent kinase 3 OS=Mus musculus GN=Cdk3 PE=1 SV=2	2	6	4	4	18.2	15	15	38.978	346	12.223	2.3	18.2	5.5	15	5.5	14.2	6.4	4.6	5.5	14.2	2.3	11	5.5	2.3	9.5	14.2	10.1	5.5	5.5	18.2	5.5	5.5	11	6.4				P97377	8039782	12566	Cdk2	P97377
682	Cyclin-dependent kinase 4 OS=Mus musculus GN=Cdk4 PE=1 SV=1	Cyclin-dependent kinase 4 OS=Mus musculus GN=Cdk4 PE=1 SV=1	DLKPENILVTSNGTVK-VTLVFEHIDQDLR	3	2	2	>sp|P30285|CDK4_MOUSE Cyclin-dependent kinase 4 OS=Mus musculus GN=Cdk4 PE=1 SV=1	1	3	2	2	12.2	9.6	9.6	33.75	303	5.1356	6.9	2.6	6.9	6.9	12.2	6.9	2.6	4.3	7.9	6.9	12.2	6.9	7.9	7.9	2.6	12.2	12.2	12.2	12.2	2.6	7.9	6.9	7.9	7.9				P30285	231727	12567	Cdk4	P30285
683	Cyclin-dependent kinase 6 OS=Mus musculus GN=Cdk6 PE=1 SV=2	Cyclin-dependent kinase 6 OS=Mus musculus GN=Cdk6 PE=1 SV=2	DLKPQNILVTSSGQIK	2	1	1	>sp|Q64261|CDK6_MOUSE Cyclin-dependent kinase 6 OS=Mus musculus GN=Cdk6 PE=1 SV=2	1	2	1	1	7.4	4.9	4.9	37.028	326	3.3308	7.4	7.4	2.5	7.4	7.4	2.5	2.5	4.9	7.4	2.5	7.4	7.4	2.5	2.5	7.4	2.5	2.5	2.5	2.5	7.4	2.5	2.5	7.4	2.5				Q64261	30316380	12571	Cdk6	Q64261
684	Cyclin-dependent kinase inhibitor 1B OS=Mus musculus GN=Cdkn1b PE=1 SV=2	Cyclin-dependent kinase inhibitor 1B OS=Mus musculus GN=Cdkn1b PE=1 SV=2	ANRTEENVSDGSPNAGTVEQTPK-NLFGPVNHEELTR-VLAQESQDVSGSR-YEWQEVER	4	4	4	>sp|P46414|CDN1B_MOUSE Cyclin-dependent kinase inhibitor 1B OS=Mus musculus GN=Cdkn1b PE=1 SV=2	1	4	4	4	28.9	28.9	28.9	22.193	197	5.9999	22.3	6.6	18.3	18.3	18.3	6.6	6.6	6.6	18.3	0	0	22.3	0	0	6.6	18.3	6.6	0	6.6	11.7	6.6	0	11.7	6.6				P46414	408360008	12576	Cdkn1b	P46414
685	Cyclin-dependent-like kinase 5 OS=Mus musculus GN=Cdk5 PE=1 SV=1	Cyclin-dependent-like kinase 5 OS=Mus musculus GN=Cdk5 PE=1 SV=1	AFGIPVR-DLKPQNLLINR-DLLQNLLK-SFLFQLLK	5	4	4	>sp|P49615|CDK5_MOUSE Cyclin-dependent-like kinase 5 OS=Mus musculus GN=Cdk5 PE=1 SV=1	1	5	4	4	14.4	11.6	11.6	33.288	292	5.3573	12	2.7	10.6	14.4	8.2	14.4	2.7	2.7	9.2	8.2	9.2	12	10.6	14.4	5.1	10.6	5.5	14.4	5.5	9.2	8.2	8.2	10.6	8.2				P49615	1345717	12568	Cdk5	P49615
686	Cyclin-K OS=Mus musculus GN=Ccnk PE=1 SV=3	Cyclin-K OS=Mus musculus GN=Ccnk PE=1 SV=3	DSQQSAQQQQQQAQQPK-KPPLAPALGEAEATGPVETSDLPK	2	2	2	>sp|O88874|CCNK_MOUSE Cyclin-K OS=Mus musculus GN=Ccnk PE=1 SV=3	1	2	2	2	7.4	7.4	7.4	61.363	554	3.7472	4.3	4.3	4.3	0	4.3	4.3	4.3	4.3	4.3	0	3.1	4.3	0	0	0	0	4.3	0	4.3	0	0	0	4.3	4.3				O88874	341940547	---	Ccnk	O88874
688	Cystathionine beta-synthase OS=Mus musculus GN=Cbs PE=2 SV=3	Cystathionine beta-synthase OS=Mus musculus GN=Cbs PE=2 SV=3	CVVILPDSVR-FDSPESHVGVAWR-QQMVFGVVTAIDLLNFVAAR-VQELSLSAPLTVLPTVTCEDTIAILR-VWIRPDTPSR	5	5	5	>sp|Q91WT9|CBS_MOUSE Cystathionine beta-synthase OS=Mus musculus GN=Cbs PE=2 SV=3	1	5	5	5	14.1	14.1	14.1	61.543	561	30.161	1.8	0	0	0	0	1.8	5.3	0	0	3.6	0	1.8	0	0	8.2	0	0	0	0	1.8	1.8	0	8.2	14.1		367;427	539	Q91WT9	81879626	12411	Cbs	Q91WT9
689	Cystathionine gamma-lyase OS=Mus musculus GN=Cth PE=1 SV=1	Cystathionine gamma-lyase OS=Mus musculus GN=Cth PE=1 SV=1	AVVLPISLATTFK-LVWIETPTNPTLK	2	2	2	>sp|Q8VCN5|CGL_MOUSE Cystathionine gamma-lyase OS=Mus musculus GN=Cth PE=1 SV=1	1	2	2	2	6.5	6.5	6.5	43.567	398	4.9424	0	0	0	0	0	6.5	6.5	0	0	3.3	0	0	0	3.3	6.5	0	0	0	0	0	0	0	6.5	6.5				Q8VCN5	27734227	107869	Cth	Q8VCN5
690	Cystatin-B OS=Mus musculus GN=Cstb PE=1 SV=1	Cystatin-B OS=Mus musculus GN=Cstb PE=1 SV=1	HDELSYF-QIVAGTNLFIK-VFQPLPHENKPLTLSSYQTNK	3	3	3	>sp|Q62426|CYTB_MOUSE Cystatin-B OS=Mus musculus GN=Cstb PE=1 SV=1	1	3	3	3	39.8	39.8	39.8	11.045	98	20.758	11.2	18.4	32.7	18.4	32.7	11.2	32.7	39.8	39.8	32.7	32.7	39.8	32.7	18.4	39.8	32.7	32.7	32.7	18.4	18.4	32.7	32.7	32.7	39.8				Q62426	2494022	13014	Cstb	Q62426
691	Cysteine and glycine-rich protein 1 OS=Mus musculus GN=Csrp1 PE=1 SV=3	Cysteine and glycine-rich protein 1 OS=Mus musculus GN=Csrp1 PE=1 SV=3	CSQAVYAAEK-GFGFGQGAGALVHSE-GLESTTLADK-GLESTTLADKDGEIYCK-GYGYGQGAGTLSTDK-GYGYGQGAGTLSTDKGESLGIK-NLDSTTVAVHGEEIYCK-SCFLCMVCK-TVYFAEEVQCEGNSFHK	9	9	9	>sp|P97315|CSRP1_MOUSE Cysteine and glycine-rich protein 1 OS=Mus musculus GN=Csrp1 PE=1 SV=3	1	9	9	9	55.4	55.4	55.4	20.583	193	323.31	38.3	42	29.5	50.8	42	50.8	46.6	33.2	46.6	42	29.5	50.8	33.2	37.8	51.8	37.8	37.8	42	42	38.9	42	47.2	33.2	33.2		25;34;37;40;58;122;167	38	P97315	47605401	13007	Csrp1	P97315
692	Cysteine and glycine-rich protein 2 OS=Mus musculus GN=Csrp2 PE=1 SV=3	Cysteine and glycine-rich protein 2 OS=Mus musculus GN=Csrp2 PE=1 SV=3	GFGYGQGAGALVHAQ-SLESTTLTEK	2	2	2	>sp|P97314|CSRP2_MOUSE Cysteine and glycine-rich protein 2 OS=Mus musculus GN=Csrp2 PE=1 SV=3	1	2	2	2	13	13	13	20.926	193	6.656	7.8	7.8	13	7.8	13	7.8	7.8	7.8	13	13	13	7.8	13	5.2	7.8	0	7.8	7.8	13	7.8	7.8	13	7.8	13				P97314	47605400	13008	Csrp2	P97314
693	Cysteine and histidine-rich domain-containing protein 1 OS=Mus musculus GN=Chordc1 PE=1 SV=1	Cysteine and histidine-rich domain-containing protein 1 OS=Mus musculus GN=Chordc1 PE=1 SV=1	FQEHIIQAPKPVEAIK-LWGVIDVK	2	2	2	>sp|Q9D1P4|CHRD1_MOUSE Cysteine and histidine-rich domain-containing protein 1 OS=Mus musculus GN=Chordc1 PE=1 SV=1	1	2	2	2	7.3	7.3	7.3	37.35	331	2.6335	7.3	7.3	7.3	7.3	7.3	7.3	7.3	7.3	2.4	7.3	2.4	7.3	0	0	2.4	4.8	0	7.3	0	2.4	4.8	2.4	7.3	0				Q9D1P4	81881223	66917	Chordc1	Q9D1P4
694	Cysteine protease ATG4B OS=Mus musculus GN=Atg4b PE=2 SV=2	Cysteine protease ATG4B OS=Mus musculus GN=Atg4b PE=2 SV=2	FAEFEDFPETSEPVWILGR-LGLTDINEAYVETLK-QPDSYFNVLNAFLDRK	3	3	3	>sp|Q8BGE6|ATG4B_MOUSE Cysteine protease ATG4B OS=Mus musculus GN=Atg4b PE=2 SV=2	1	3	3	3	12.7	12.7	12.7	44.375	393	10.237	4.1	0	0	8.9	3.8	12.7	12.7	12.7	4.8	0	4.8	12.7	0	0	4.8	12.7	0	0	12.7	12.7	7.9	0	7.9	7.9				Q8BGE6	61211813	66615	Atg4b	Q8BGE6
695	Cysteine sulfinic acid decarboxylase OS=Mus musculus GN=Csad PE=2 SV=1	Cysteine sulfinic acid decarboxylase OS=Mus musculus GN=Csad PE=2 SV=1	ALPPLALFTSK-FFNQLFSGLDPHALAGR-GAAFLGLGTDSVR-LSQVAPVLK	4	4	4	>sp|Q9DBE0|CSAD_MOUSE Cysteine sulfinic acid decarboxylase OS=Mus musculus GN=Csad PE=2 SV=1	1	4	4	4	10.1	10.1	10.1	55.144	493	15.763	3.4	2.6	3.4	2.6	3.4	6.1	8.3	0	8.3	0	3.4	8.3	0	2.2	2.6	3.4	0	2.6	6.1	6.1	3.4	1.8	8.3	3.4				Q9DBE0	27151478	246277	Csad	Q9DBE0
696	Cysteine-rich protein 1 OS=Mus musculus GN=Crip1 PE=1 SV=2	Cysteine-rich protein 1 OS=Mus musculus GN=Crip1 PE=1 SV=2	CDKEVYFAER-EVYFAER	2	2	2	>sp|P63254|CRIP1_MOUSE Cysteine-rich protein 1 OS=Mus musculus GN=Crip1 PE=1 SV=2	1	2	2	2	13	13	13	8.5497	77	5.1785	9.1	13	0	13	0	9.1	13	9.1	13	0	0	0	9.1	0	9.1	0	13	13	13	13	13	13	9.1	13		7		P63254	54036890	12925	Crip1	P63254
697	Cysteine-rich protein 2 OS=Mus musculus GN=Crip2 PE=1 SV=1	Cysteine-rich protein 2 OS=Mus musculus GN=Crip2 PE=1 SV=1	ASSVTTFTGEPNMCPR-GVNIGGAGSYIYEKPQTEAPQVTGPIEVPVVR-GVNTGAVGSYIYDKDPEGTVQP-TVYFAEK	4	4	4	>sp|Q9DCT8|CRIP2_MOUSE Cysteine-rich protein 2 OS=Mus musculus GN=Crip2 PE=1 SV=1	1	4	4	4	37	37	37	22.727	208	147.8	18.8	13.9	29.3	33.7	26	29.3	0	29.3	29.3	18.8	15.4	29.3	29.3	29.3	13.9	29.3	29.3	15.4	29.3	29.3	29.3	37	29.3	29.3		126	125	Q9DCT8	47605547	68337	Crip2	Q9DCT8
698	Cysteine-rich with EGF-like domain protein 2 OS=Mus musculus GN=Creld2 PE=2 SV=1	Cysteine-rich with EGF-like domain protein 2 OS=Mus musculus GN=Creld2 PE=2 SV=1	ESGQCTDIDECSLEEK-KNFGGGNTAWEEK-VTEENPTQPPSREDL-YEFSEIR	4	4	4	>sp|Q9CYA0|CREL2_MOUSE Cysteine-rich with EGF-like domain protein 2 OS=Mus musculus GN=Creld2 PE=2 SV=1	1	4	4	4	14.6	14.6	14.6	38.219	350	34.104	10.9	4.6	0	5.7	4.3	8.9	12.6	12.6	0	8.9	4.3	8.9	10.9	0	2	2	4.6	14.6	8	8.9	5.7	8.9	10	10		286;292		Q9CYA0	81904404	76737	Creld2	Q9CYA0
699	Cysteine--tRNA ligase, cytoplasmic OS=Mus musculus GN=Cars PE=2 SV=2	Cysteine--tRNA ligase, cytoplasmic OS=Mus musculus GN=Cars PE=2 SV=2	ALQEGEGDLSISADR-LATEPLEQAVR-SYISFDILR-VLEVLQLSDALRDDILPELGVR	4	4	4	>sp|Q9ER72|SYCC_MOUSE Cysteine--tRNA ligase, cytoplasmic OS=Mus musculus GN=Cars PE=2 SV=2	1	4	4	4	6.9	6.9	6.9	94.859	831	7.1813	0	0	0	0	1.3	1.3	0	0	0	1.3	1.3	0	1.3	0	1.3	4.2	1.3	1.3	0	4	0	1.3	1.3	1.3				Q9ER72	47117033	27267	Cars	Q9ER72
700	Cytochrome b-245 heavy chain OS=Mus musculus GN=Cybb PE=1 SV=1; NADPH oxidase 1 OS=Mus musculus GN=Nox1 PE=1 SV=2	Cytochrome b-245 heavy chain OS=Mus musculus GN=Cybb PE=1 SV=1	IKNPEGGLYVAVTR-LLGSALALAR-MEVGQYIFVK-NPEGGLYVAVTR-QSISNSESGPR-TIASEHPNTTIGVFLCGPEALAETLSK-YCDNATSLK-YSIALSDIGDNENEEYLNFAR-NLLSFLR	9;1	9;1	9;1	>sp|Q61093|CY24B_MOUSE Cytochrome b-245 heavy chain OS=Mus musculus GN=Cybb PE=1 SV=1	2	9	9	9	19.1	19.1	19.1	65.304	570	23.148	10.7	1.8	15.1	6.7	4.9	15.4	6.7	7.4	3	12.1	7.4	12.6	5.4	1.8	1.8	14.2	7.5	1.8	9.1	5.4	2.5	7	13.3	10.7		428;537		Q61093	6685252	13058	Cybb	Q61093
701	Cytochrome b-245 light chain OS=Mus musculus GN=Cyba PE=1 SV=3	Cytochrome b-245 light chain OS=Mus musculus GN=Cyba PE=1 SV=3	LFGPLTR-QPPTNPPPRPPAEVR-YLTSVVK	3	3	3	>sp|Q61462|CY24A_MOUSE Cytochrome b-245 light chain OS=Mus musculus GN=Cyba PE=1 SV=3	1	3	3	3	15.1	15.1	15.1	20.748	192	3.5991	0	0	11.5	3.6	15.1	15.1	0	3.6	3.6	15.1	15.1	15.1	15.1	7.3	3.6	3.6	0	3.6	3.6	0	0	3.6	3.6	7.3				Q61462	20137336	13057	Cyba	Q61462
702	Cytochrome b5 OS=Mus musculus GN=Cyb5a PE=1 SV=2	Cytochrome b5 OS=Mus musculus GN=Cyb5a PE=1 SV=2	EQAGGDATENFEDVGHSTDAR-FLEEHPGGEEVLR-TYIIGELHPDDR-YYTLEEIQK	4	4	4	>sp|P56395|CYB5_MOUSE Cytochrome b5 OS=Mus musculus GN=Cyb5a PE=1 SV=2	1	4	4	4	41	41	41	15.241	134	126.45	41	41	41	41	31.3	25.4	32.1	41	41	15.7	34.3	41	18.7	41	41	41	41	41	25.4	41	41	34.3	41	41				P56395	3023608	109672	Cyb5a	P56395
703	Cytochrome b5 type B OS=Mus musculus GN=Cyb5b PE=1 SV=1	Cytochrome b5 type B OS=Mus musculus GN=Cyb5b PE=1 SV=1	FLSEHPGGEEVLLEQAGADATESFEDVGHSPDAR-QYYIGDVHPSDLKPK-VEGSEPSVTYYR	3	3	3	>sp|Q9CQX2|CYB5B_MOUSE Cytochrome b5 type B OS=Mus musculus GN=Cyb5b PE=1 SV=1	1	3	3	3	41.8	41.8	41.8	16.318	146	20	18.5	8.2	8.2	31.5	8.2	33.6	31.5	18.5	31.5	8.2	0	31.5	0	33.6	18.5	0	8.2	41.8	18.5	31.5	8.2	0	31.5	18.5				Q9CQX2	62510660	66427	Cyb5b	Q9CQX2
704	Cytochrome b-c1 complex subunit 1, mitochondrial OS=Mus musculus GN=Uqcrc1 PE=1 SV=2	Cytochrome b-c1 complex subunit 1, mitochondrial OS=Mus musculus GN=Uqcrc1 PE=1 SV=2	EVESIGAHLNAYSTR-IPLAEWESR-IQEVDAQMLR-LCTSATESEVTR-MVLAAAGGVEHQQLLDLAQK-NALVSHLDGTTPVCEDIGR-NNGAGYFLEHLAFK-NRPGNALEKEVESIGAHLNAYSTR-RIPLAEWESR-SGMFWLR-SLLTYGR-TDLTDYLNR-VVELLADIVQNSSLEDSQIEK-VVELLADIVQNSSLEDSQIEKER-VYEEDAVPGLTPCR-YETEKNNGAGYFLEHLAFK-YFYDQCPAVAGYGPIEQLPDYNR-FTGSEIR	18	18	17	>sp|Q9CZ13|QCR1_MOUSE Cytochrome b-c1 complex subunit 1, mitochondrial OS=Mus musculus GN=Uqcrc1 PE=1 SV=2	1	18	18	17	42.5	42.5	41	52.851	480	184.29	34.2	16.5	15.4	25.6	15.8	22.7	33.3	17.3	28.5	17.7	33.3	26.7	10.4	13.3	18.3	27.1	7.9	13.3	13.3	25.6	18.8	18.5	19.8	14.4		268;380;410;453	229;440;475	Q9CZ13	341941780	22273	Uqcrc1	Q9CZ13
705	Cytochrome b-c1 complex subunit 2, mitochondrial OS=Mus musculus GN=Uqcrc2 PE=1 SV=1	Cytochrome b-c1 complex subunit 2, mitochondrial OS=Mus musculus GN=Uqcrc2 PE=1 SV=1	AVAFQNSQTR-AVAQGNLSSADVQAAK-GNNTTSLLSQSVAK-IIENLHDVAYK-ITSEELHYFVQNHFTSAR-LPNGLVIASLENYAPLSR-LSVTATR-NALANPLYCPDYR-RGNNTTSLLSQSVAK-SMAASGNLGHTPFLDEL-TSAAPGGVPLQPQDLEFTK-TSAAPGGVPLQPQDLEFTKLPNGLVIASLENYAPLSR-WEVAALR-YEDSNNLGTSHLLR	14	14	14	>sp|Q9DB77|QCR2_MOUSE Cytochrome b-c1 complex subunit 2, mitochondrial OS=Mus musculus GN=Uqcrc2 PE=1 SV=1	1	14	14	14	36.4	36.4	36.4	48.234	453	295.37	17.9	18.3	30	28.7	24.7	27.2	26.9	30.2	25.6	25.6	26.9	21.9	24.5	17.7	23	20.3	5.3	24.1	23.2	25.4	21.6	18.1	29.8	23.2		192		Q9DB77	14548302	67003	Uqcrc2	Q9DB77
706	Cytochrome b-c1 complex subunit 6, mitochondrial OS=Mus musculus GN=Uqcrh PE=1 SV=2	Cytochrome b-c1 complex subunit 6, mitochondrial OS=Mus musculus GN=Uqcrh PE=1 SV=2	EEEEEELVDPLTTVR-SQTEEDCTEELFDFLHAR	2	2	2	>sp|P99028|QCR6_MOUSE Cytochrome b-c1 complex subunit 6, mitochondrial OS=Mus musculus GN=Uqcrh PE=1 SV=2	1	2	2	2	37.1	37.1	37.1	10.435	89	17.257	37.1	0	0	0	20.2	0	0	0	20.2	0	0	0	0	0	0	16.9	16.9	0	0	37.1	0	20.2	20.2	0		65		P99028	19862081	66576	Uqcrh	P99028
707	Cytochrome b-c1 complex subunit 7 OS=Mus musculus GN=Uqcrb PE=1 SV=3	Cytochrome b-c1 complex subunit 7 OS=Mus musculus GN=Uqcrb PE=1 SV=3	LPEDLYNDR-WYYNAAGFNK-YEEDKFYLEPYLK	3	3	3	>sp|Q9D855|QCR7_MOUSE Cytochrome b-c1 complex subunit 7 OS=Mus musculus GN=Uqcrb PE=1 SV=3	1	3	3	3	28.8	28.8	28.8	13.527	111	29.293	28.8	0	11.7	11.7	20.7	20.7	11.7	20.7	20.7	20.7	11.7	11.7	11.7	11.7	11.7	9	20.7	9	20.7	20.7	11.7	11.7	20.7	20.7				Q9D855	17380333	---	Uqcrb	Q9D855
708	Cytochrome b-c1 complex subunit 8 OS=Mus musculus GN=Uqcrq PE=1 SV=3	Cytochrome b-c1 complex subunit 8 OS=Mus musculus GN=Uqcrq PE=1 SV=3	HVISYSLSPFEQR-VAPPFVVVYLIYTWGNQEFEQSK	2	2	2	>sp|Q9CQ69|QCR8_MOUSE Cytochrome b-c1 complex subunit 8 OS=Mus musculus GN=Uqcrq PE=1 SV=3	1	2	2	2	43.9	43.9	43.9	9.7681	82	6.8921	15.9	0	15.9	43.9	15.9	0	15.9	15.9	15.9	15.9	0	15.9	15.9	0	15.9	15.9	0	0	43.9	43.9	0	15.9	0	15.9				Q9CQ69	20140777	22272	Uqcrq	Q9CQ69
709	Cytochrome b-c1 complex subunit Rieske, mitochondrial OS=Mus musculus GN=Uqcrfs1 PE=1 SV=1	Cytochrome b-c1 complex subunit Rieske, mitochondrial OS=Mus musculus GN=Uqcrfs1 PE=1 SV=1	EIDQEAAVEVSQLR-EIDQEAAVEVSQLRDPQHDLDR-LSDIPEGK-VPDFSDYR	4	4	4	>sp|Q9CR68|UCRI_MOUSE Cytochrome b-c1 complex subunit Rieske, mitochondrial OS=Mus musculus GN=Uqcrfs1 PE=1 SV=1	1	4	4	4	13.9	13.9	13.9	29.367	274	9.2862	8	5.1	10.9	13.9	8	13.9	0	8	10.9	13.9	5.8	13.9	5.8	10.9	2.9	5.8	10.9	13.9	2.9	10.9	8	13.9	10.9	10.9				Q9CR68	52000877	66694	Uqcrfs1	Q9CR68
711	Cytochrome c oxidase subunit 2 OS=Mus musculus GN=Mtco2 PE=1 SV=1	Cytochrome c oxidase subunit 2 OS=Mus musculus GN=Mtco2 PE=1 SV=1	ILYMMDEINNPVLTVK-LLEVDNR-MLISSEDVLHSWAVPSLGLK-TDAIPGR-VVLPMELPIR	5	5	5	>sp|P00405|COX2_MOUSE Cytochrome c oxidase subunit 2 OS=Mus musculus GN=Mtco2 PE=1 SV=1	1	5	5	5	26.4	26.4	26.4	25.976	227	141.52	26.4	6.2	10.6	23.3	19.4	23.3	7.5	17.6	26.4	17.6	17.6	19.4	17.6	16.3	7.5	16.3	10.6	19.4	16.3	16.3	16.3	7.5	17.6	15			86;87;146;152	P00405	117029	17709	Mtco2	P00405
712	Cytochrome c oxidase subunit 4 isoform 1, mitochondrial OS=Mus musculus GN=Cox4i1 PE=1 SV=2	Cytochrome c oxidase subunit 4 isoform 1, mitochondrial OS=Mus musculus GN=Cox4i1 PE=1 SV=2	ADWSSLSR-ANPIQGFSAK-DYPLPDVAHVTMLSASQK-IQFNESFAEMNR-SEDYAFPTYADR-SEDYAFPTYADRR-SYVYGPIPHTFDR	7	7	7	>sp|P19783|COX41_MOUSE Cytochrome c oxidase subunit 4 isoform 1, mitochondrial OS=Mus musculus GN=Cox4i1 PE=1 SV=2	1	7	7	7	43.8	43.8	43.8	19.53	169	42.677	33.1	32	26	29	31.4	36.7	18.3	26	28.4	32	31.4	29	32	36.1	13.6	43.8	26	18.3	36.1	26	13.6	16.6	33.1	18.3			54;93	P19783	416827	12857	Cox4i1	P19783
713	Cytochrome c oxidase subunit 5A, mitochondrial OS=Mus musculus GN=Cox5a PE=1 SV=2	Cytochrome c oxidase subunit 5A, mitochondrial OS=Mus musculus GN=Cox5a PE=1 SV=2	EIYPYVIQELRPTLNELGISTPEELGLDKV-GMNTLVGYDLVPEPK-IIDAALR-LNDFASAVR-RLNDFASAVR-WVTYFNKPDIDAWELR-WVTYFNKPDIDAWELRK	7	7	7	>sp|P12787|COX5A_MOUSE Cytochrome c oxidase subunit 5A, mitochondrial OS=Mus musculus GN=Cox5a PE=1 SV=2	1	7	7	7	54.1	54.1	54.1	16.101	146	36.971	33.6	47.9	22.6	48.6	11.6	32.9	17.1	16.4	32.2	28.8	32.9	17.8	21.2	17.1	23.3	17.1	23.3	17.8	48.6	54.1	32.9	28.8	27.4	32.9			70	P12787	166897986	12858	Cox5a	P12787
714	Cytochrome c oxidase subunit 5B, mitochondrial OS=Mus musculus GN=Cox5b PE=1 SV=1	Cytochrome c oxidase subunit 5B, mitochondrial OS=Mus musculus GN=Cox5b PE=1 SV=1	AASGTKEDPNLVPSISNK-EDPNLVPSISNK-EDPNLVPSISNKR-EIMIAAQK	4	4	4	>sp|P19536|COX5B_MOUSE Cytochrome c oxidase subunit 5B, mitochondrial OS=Mus musculus GN=Cox5b PE=1 SV=1	1	4	4	4	21.1	21.1	21.1	13.813	128	9.9914	16.4	14.8	21.1	21.1	14.8	14.1	14.1	14.8	14.8	21.1	14.8	14.8	10.2	10.2	9.4	10.2	16.4	14.8	14.8	14.8	14.8	10.2	14.8	14.8			51	P19536	117104	---	Cox5b	P19536
715	Cytochrome c oxidase subunit 6B1 OS=Mus musculus GN=Cox6b1 PE=1 SV=2	Cytochrome c oxidase subunit 6B1 OS=Mus musculus GN=Cox6b1 PE=1 SV=2	GGDVSVCEWYR-IAEGTFPGK-NCWQNYLDFHR-SLCPVSWVSAWDDR	4	4	4	>sp|P56391|CX6B1_MOUSE Cytochrome c oxidase subunit 6B1 OS=Mus musculus GN=Cox6b1 PE=1 SV=2	1	4	4	4	52.3	52.3	52.3	10.071	86	19.029	36	12.8	29.1	41.9	12.8	12.8	12.8	29.1	16.3	12.8	0	0	16.3	16.3	0	16.3	12.8	0	12.8	39.5	12.8	16.3	12.8	0		30;54;65		P56391	3023546	110323	Cox6b1	P56391
716	Cytochrome c oxidase subunit 6C OS=Mus musculus GN=Cox6c PE=1 SV=3	Cytochrome c oxidase subunit 6C OS=Mus musculus GN=Cox6c PE=1 SV=3	AGIFQSAK-AYAEFYR-FGVAEPR	3	3	3	>sp|Q9CPQ1|COX6C_MOUSE Cytochrome c oxidase subunit 6C OS=Mus musculus GN=Cox6c PE=1 SV=3	1	3	3	3	28.9	28.9	28.9	8.4689	76	3.3581	10.5	19.7	19.7	10.5	10.5	9.2	9.2	19.7	19.7	19.7	10.5	9.2	10.5	0	19.7	28.9	9.2	0	9.2	28.9	10.5	10.5	0	9.2				Q9CPQ1	48428148	12864	Cox6c	Q9CPQ1
718	Cytochrome c oxidase subunit NDUFA4 OS=Mus musculus GN=Ndufa4 PE=1 SV=2	Cytochrome c oxidase subunit NDUFA4 OS=Mus musculus GN=Ndufa4 PE=1 SV=2	FYSVNVDYSK-LALFNPDVSWDR-LGPNEQYK-NNPEPWNK	4	4	4	>sp|Q62425|NDUA4_MOUSE Cytochrome c oxidase subunit NDUFA4 OS=Mus musculus GN=Ndufa4 PE=1 SV=2	1	4	4	4	46.3	46.3	46.3	9.3267	82	15.284	46.3	36.6	36.6	46.3	36.6	36.6	46.3	36.6	36.6	46.3	36.6	46.3	14.6	46.3	36.6	46.3	46.3	14.6	22	46.3	46.3	26.8	36.6	36.6				Q62425	23503090	17992	Ndufa4	Q62425
719	Cytochrome c, somatic OS=Mus musculus GN=Cycs PE=1 SV=2;CON__P62894; Cytochrome c, testis-specific OS=Mus musculus GN=Cyct PE=1 SV=3	Cytochrome c, somatic OS=Mus musculus GN=Cycs PE=1 SV=2	ADLIAYLK-KTGQAAGFSYTDANK-TGQAAGFSYTDANK-TGQAAGFSYTDANKNK-TGPNLHGLFGR-MIFAGIK	6;2;1	6;2;1	6;2;1	>sp|P62897|CYC_MOUSE Cytochrome c, somatic OS=Mus musculus GN=Cycs PE=1 SV=2	3	6	6	6	41	41	41	11.605	105	31.339	32.4	26.7	41	28.6	39	31.4	21	28.6	26.7	32.4	39	41	18.1	32.4	32.4	32.4	32.4	32.4	34.3	26.7	41	28.6	21	32.4			81	P62897	51702234	13063	Cycs	P62897
720	Cytochrome c1, heme protein, mitochondrial OS=Mus musculus GN=Cyc1 PE=1 SV=1	Cytochrome c1, heme protein, mitochondrial OS=Mus musculus GN=Cyc1 PE=1 SV=1	AANNGALPPDLSYIVR-DVATFLR-GLLSSLDHTSIR-HGGEDYVFSLLTGYCEPPTGVSLR-HLVGVCYTEEEAK-LSDYFPKPYPNPEAAR	6	6	6	>sp|Q9D0M3|CY1_MOUSE Cytochrome c1, heme protein, mitochondrial OS=Mus musculus GN=Cyc1 PE=1 SV=1	1	6	6	6	27.1	27.1	27.1	35.327	325	94.617	23.1	10.8	23.1	23.1	19.4	19.7	0	23.1	27.1	27.1	27.1	19.7	27.1	15.7	15.7	23.1	15.7	23.1	15.7	27.1	23.1	23.1	15.7	12		139;219		Q9D0M3	21759079	66445	Cyc1	Q9D0M3
721	Cytochrome P450 1B1 OS=Mus musculus GN=Cyp1b1 PE=1 SV=3	Cytochrome P450 1B1 OS=Mus musculus GN=Cyp1b1 PE=1 SV=3	ELVAVLVR-FSSFLPVTIPHATTANTFVLGYYIPK-NFSNFVLDK-TVGAGSLVDVLPWLQLFPNPVR	4	4	4	>sp|Q64429|CP1B1_MOUSE Cytochrome P450 1B1 OS=Mus musculus GN=Cyp1b1 PE=1 SV=3	1	4	4	4	12	12	12	60.537	543	16.352	0	0	1.5	4.8	0	10.3	1.5	0	8.8	1.7	1.7	1.5	1.7	1.7	0	10.3	0	0	1.5	5.5	1.5	1.7	10.3	10.3				Q64429	341940522	13078	Cyp1b1	Q64429
723	Cytoglobin OS=Mus musculus GN=Cygb PE=2 SV=1	Cytoglobin OS=Mus musculus GN=Cygb PE=2 SV=1	EVGWVQQVPNTTTPPATLPSSGP-FFVNFPSAK	2	2	2	>sp|Q9CX80|CYGB_MOUSE Cytoglobin OS=Mus musculus GN=Cygb PE=2 SV=1	1	2	2	2	16.8	16.8	16.8	21.465	190	5.2188	0	16.8	4.7	0	16.8	12.1	0	16.8	16.8	12.1	12.1	4.7	16.8	12.1	4.7	0	16.8	12.1	12.1	16.8	0	16.8	4.7	16.8				Q9CX80	21263506	114886	Cygb	Q9CX80
724	Cytohesin-4 OS=Mus musculus GN=Cyth4 PE=2 SV=1	Cytohesin-4 OS=Mus musculus GN=Cyth4 PE=2 SV=1	GIIPLENLSVQK-LLTSDVQDIAQFLYK-QFLWSFR-VPFYDLLSAR	4	4	3	>sp|Q80YW0|CYH4_MOUSE Cytohesin-4 OS=Mus musculus GN=Cyth4 PE=2 SV=1	1	4	4	3	11.2	11.2	9.4	45.284	393	6.2541	2.5	9.4	11.2	5.6	2.5	8.7	9.4	9.4	8.1	2.5	3.8	5.6	0	3.1	0	5.6	0	3.8	9.4	3.1	1.8	2.5	9.4	0				Q80YW0	52000718	72318	Cyth4	Q80YW0
725	Cytokine receptor-like factor 3 OS=Mus musculus GN=Crlf3 PE=2 SV=1	Cytokine receptor-like factor 3 OS=Mus musculus GN=Crlf3 PE=2 SV=1	EGEIAILGGIEEESDKLWNFTK-ENVEAAQSYR-HGTVASRPPVQIEELIEKPGGIIVR-LIEHGVNTADDLVR-VDDDFTAQDYR	5	5	5	>sp|Q9Z2L7|CRLF3_MOUSE Cytokine receptor-like factor 3 OS=Mus musculus GN=Crlf3 PE=2 SV=1	1	5	5	5	18.6	18.6	18.6	49.558	442	27.212	12.9	5.4	8.8	7.9	11.1	18.6	13.6	18.6	12.9	12.9	10.4	13.6	7.9	0	5.7	13.8	8.8	11.1	11.1	13.8	15.4	0	8.8	16.1				Q9Z2L7	81882108	54394	Crlf3	Q9Z2L7
726	Cytoplasmic aconitate hydratase OS=Mus musculus GN=Aco1 PE=1 SV=3	Cytoplasmic aconitate hydratase OS=Mus musculus GN=Aco1 PE=1 SV=3	ANYLASPPLVIAYAIAGTVR-AVLAESYER-DFNDTSQDPDFTQVVELDLK-DIWPTRDEIQAVER-EFNSYGSR-FVEFFGPGVAQLSIADR-GPFLLGIK-IDFEKEPLGVNAQGR-IIPPGSGIIHQVNLEYLAR-NIEVPFKPAR-NQDLEFER-QAPQTVHLPSGETLDVFDAAER-SIVDAYVLLNLGDSVTTDHISPAGNIAR-SWNALAAPSEK-TSLSPGSGVVTYYLR-VLLEAAVR-YQQAGLPLIVLAGK-YTINIPEDLKPR	18	18	17	>sp|P28271|ACOC_MOUSE Cytoplasmic aconitate hydratase OS=Mus musculus GN=Aco1 PE=1 SV=3	1	18	18	17	29	29	28.1	98.124	889	54.181	24.5	13.3	15.4	13.5	18.6	21.1	23.2	25	12.1	9.6	6.7	14.2	11.9	6.3	14.5	22.2	10.5	8.7	17	25.4	17	14.6	22	12.5				P28271	341940613	11428	Aco1	P28271
727	Cytoplasmic dynein 1 heavy chain 1 OS=Mus musculus GN=Dync1h1 PE=1 SV=2	Cytoplasmic dynein 1 heavy chain 1 OS=Mus musculus GN=Dync1h1 PE=1 SV=2	ADLAAVEAK-AELGEYIR-AHQANQLYPFAISLIESVR-ALGEYLER-APVIDADKPVSSQLR-ASVVTLPVYLNFTR-AVDDLNLHSYSNLPIWVNK-DLEASIAR-DLFQVAFNR-DLPPVSGSIIWAK-DLSSQLLK-EALELTDTGLLSGSEER-EDLDKVEPAVIEAQNAVK-EEFVQWVELLPDAQTPSWLGLPNNAER-EFGPVVIDYGK-ENFIPTIVNFSAEEISDAIR-ESPEVLLTLDILK-EWTDGLFTHVLR-EYQTQLIQR-FGNPLLVQDVESYDPVLNPVLNR-FLSDPQVHTVLVER-FNYGFEYLGVQDK-FTQDTQPHYIYSPR-FYFVGDEDLLEIIGNSK-GIFEALRPLETLPVEGLIR-HFPNIDK-HVPVVYVDY…	73	73	73	>sp|Q9JHU4|DYHC1_MOUSE Cytoplasmic dynein 1 heavy chain 1 OS=Mus musculus GN=Dync1h1 PE=1 SV=2	1	73	73	73	20.8	20.8	20.8	532.04	4644	164.82	7.5	10.9	14.4	11.3	12	11.6	12.7	15.2	11.4	11.4	13.6	8.2	8.5	4.2	12	15.5	7.4	6.4	9.3	12.9	7	11.5	16.8	13.6			2601	Q9JHU4	341940472	13424	Dync1h1	Q9JHU4
728	Cytoplasmic dynein 1 intermediate chain 2 OS=Mus musculus GN=Dync1i2 PE=1 SV=1	Cytoplasmic dynein 1 intermediate chain 2 OS=Mus musculus GN=Dync1i2 PE=1 SV=1	DLEDKEGEIQAGAK-EIAVGDSEGQIVIYDVGEQIAVPR-ETQTPVTAQPKEDEEEEDDVATPKPPVEPEEEK-LDLWNLNNDTEVPTASISVEGNPALNR-QQILHSEEFLSFFDHSTR	5	5	5	>sp|O88487|DC1I2_MOUSE Cytoplasmic dynein 1 intermediate chain 2 OS=Mus musculus GN=Dync1i2 PE=1 SV=1	1	5	5	5	19	19	19	68.393	612	18.607	13.6	10.6	11.3	9.2	2.3	0	7.4	13.6	6.7	3.9	0	2.3	3.9	0	10.6	7.4	6.2	0	8.3	12.7	9.2	8.3	13.6	0				O88487	6647516	13427	Dync1i2	O88487
729	Cytoplasmic dynein 1 light intermediate chain 1 OS=Mus musculus GN=Dync1li1 PE=1 SV=1	Cytoplasmic dynein 1 light intermediate chain 1 OS=Mus musculus GN=Dync1li1 PE=1 SV=1	AGATSEGVLANFFNSLLSK-DFQEYVEPGEDFPASPQR-FSLDALSLR-IGILHENFQTLK-IPAVVVEK-LYGFPYK-NVLLLGEDGAGK-QPPTAAGRPVDASPR-SVSSNVASVSPIPAGSK	9	9	9	>sp|Q8R1Q8|DC1L1_MOUSE Cytoplasmic dynein 1 light intermediate chain 1 OS=Mus musculus GN=Dync1li1 PE=1 SV=1	1	9	9	9	22.4	22.4	22.4	56.614	523	34.055	14	17.2	18	9	15.1	17.4	20.8	17.2	21	14.1	12.4	19.5	6.9	0	8.4	14.7	14.1	11.7	16.1	20.8	15.1	14.3	17.6	16.1				Q8R1Q8	73919260	235661	Dync1li1	Q8R1Q8
730	Cytoplasmic dynein 1 light intermediate chain 2 OS=Mus musculus GN=Dync1li2 PE=1 SV=2	Cytoplasmic dynein 1 light intermediate chain 2 OS=Mus musculus GN=Dync1li2 PE=1 SV=2	GGPASVPSASPGTSVK-NILVFGEDGSGK-NNAASEGVLASFFNSLLSK-TGSPGSPSAGGVQSTAK-TVLSNVQEELDR-TYGFHFTIPALVVEK	6	6	6	>sp|Q6PDL0|DC1L2_MOUSE Cytoplasmic dynein 1 light intermediate chain 2 OS=Mus musculus GN=Dync1li2 PE=1 SV=2	1	6	6	6	18.5	18.5	18.5	54.218	492	12.639	12.6	9.1	5.5	3.9	15	10.2	8.7	12.6	8.7	5.5	7.9	12.6	0	2.4	6.3	7.1	6.9	3.3	6.9	16.1	5.7	2.4	12.6	12.6				Q6PDL0	341940424	234663	Dync1li2	Q6PDL0
731	Cytoplasmic FMR1-interacting protein 1 OS=Mus musculus GN=Cyfip1 PE=1 SV=1	Cytoplasmic FMR1-interacting protein 1 OS=Mus musculus GN=Cyfip1 PE=1 SV=1	ALNLAYSSIYGSYR-DIVEYAELK-FQILNDEIITILDK-KFQILNDEIITILDK-NVIQSVLQAIR-SSLEGPTILDIEK-TFLDDPIWR-TVLPFSQEFQR-YNYTTEEK-YSNSEVVTGSGR	18	10	10	>sp|Q7TMB8|CYFP1_MOUSE Cytoplasmic FMR1-interacting protein 1 OS=Mus musculus GN=Cyfip1 PE=1 SV=1	1	18	10	10	15.2	8.1	8.1	145.24	1253	43.263	8.3	10.5	10.5	7.7	10.9	9	7.2	8.5	8.4	10.5	10.7	7.6	6.8	4.7	6.7	10.5	5.1	7.3	8.6	8	5.7	11.9	10.5	10.6			311	Q7TMB8	81885902	20430	Cyfip1	Q7TMB8
732	Cytoplasmic FMR1-interacting protein 2 OS=Mus musculus GN=Cyfip2 PE=1 SV=2	Cytoplasmic FMR1-interacting protein 2 OS=Mus musculus GN=Cyfip2 PE=1 SV=2	DFVSEAYLLTLGK-DIIEYAELK-NTIYAALQDFAQVTLREPLR-NVLISVLQAIR-NYGVIIPYPPSNR-SYLQDPIWR-TAIPFTQEPQR-TDVFQSLR-YNYTSEEK-YQILNNEVFAILNK-FISELAR-LADQIFAYYK-LGTPQQIAIAR-NAFVTGIAR-QLQVVPLFGDMQIELAR-SLLQGTILQYVK-TVEVLEPEVTK-YAPLHLVPLIER	18	18	10	>sp|Q5SQX6|CYFP2_MOUSE Cytoplasmic FMR1-interacting protein 2 OS=Mus musculus GN=Cyfip2 PE=1 SV=2	1	18	18	10	16.4	16.4	9.3	145.66	1253	43.539	10.6	11	10.5	7	10	7.7	6.6	11.1	7.3	10.5	10.8	6.9	8.3	3.4	4.9	6.4	7.1	6.8	7	7.2	6.4	11.2	10.7	9.9			311	Q5SQX6	81862370	76884	Cyfip2	Q5SQX6
733	Cytoplasmic protein NCK1 OS=Mus musculus GN=Nck1 PE=1 SV=1	Cytoplasmic protein NCK1 OS=Mus musculus GN=Nck1 PE=1 SV=1	DSESSPNDFSVSLK-LWLLDDSK	2	2	1	>sp|Q99M51|NCK1_MOUSE Cytoplasmic protein NCK1 OS=Mus musculus GN=Nck1 PE=1 SV=1	1	2	2	1	5.8	5.8	3.7	42.89	377	3.3041	2.1	5.8	2.1	5.8	3.7	2.1	5.8	5.8	2.1	0	5.8	5.8	3.7	0	2.1	5.8	0	3.7	0	5.8	5.8	2.1	2.1	2.1				Q99M51	81880301	17973	Nck1	Q99M51
734	Cytoskeleton-associated protein 4 OS=Mus musculus GN=Ckap4 PE=1 SV=2	Cytoskeleton-associated protein 4 OS=Mus musculus GN=Ckap4 PE=1 SV=2	DFTSLENTVEER-HTESLESLLSK-IETNENNLESAK-ISEVLQK-LALQALTEK-LAMLQEHVGNLGSSSDLASTVR-QIEGLGAR-QRDELGQGLQGVEQK-RLEEELQQLK-SINDNIAIFTDVQKR-SLGETQLALSSDLK-SSLQTMESDVYTEVR-SSVSQVESDLK-TAVDSLVAYSVK-VQSLQATFGTFESLLR	15	15	15	>sp|Q8BMK4|CKAP4_MOUSE Cytoskeleton-associated protein 4 OS=Mus musculus GN=Ckap4 PE=1 SV=2	1	15	15	15	32.9	32.9	32.9	63.691	575	80.25	11.1	11.1	15.1	12	12.2	11.7	16.2	14.4	7.5	11	6.3	21.7	15.3	0	10.3	15.7	19.8	18.6	20.5	25.2	26.1	13.2	15.7	15.7			430	Q8BMK4	116243094	216197	Ckap4	Q8BMK4
735	Cytoskeleton-associated protein 5 OS=Mus musculus GN=Ckap5 PE=2 SV=1	Cytoskeleton-associated protein 5 OS=Mus musculus GN=Ckap5 PE=2 SV=1	FIQPNIGELPTALK-LDDIFEPVLIPEPK-NAALNTIVTVYNVHGDQVFK-NLGIPVITVLGDSK	4	4	4	>sp|A2AGT5|CKAP5_MOUSE Cytoskeleton-associated protein 5 OS=Mus musculus GN=Ckap5 PE=2 SV=1	1	4	4	4	3.1	3.1	3.1	225.63	2032	5.2991	0	0.7	1.7	1.7	1.4	2.1	1.7	1.4	0.7	1.4	2.4	1.4	0.7	0	0.7	2.4	0.7	0	1.4	0.7	0.7	1.4	2.4	2.4				A2AGT5	223635094	75786	Ckap5	A2AGT5
736	Cytosol aminopeptidase OS=Mus musculus GN=Lap3 PE=1 SV=3	Cytosol aminopeptidase OS=Mus musculus GN=Lap3 PE=1 SV=3	DKDDDLPQFTSAGESFNK-EMLNISGPPLK-FAEIIEK-GITFDSGGISIK-GLVLGIYAK-GSEEPPVFLEIHYMGSPNATEAPLVFVGK-GVLFASGQNLAR-LFEASVETGDR-LILADALCYAHTFNPK-LNLPINIIGLAPLCENMPSGK-QVIDCQLADVNNLGK-SAGACTAAAFLR-SAGVDDQENWHEGKENIR-TFYGLHQDFPSVVVVGLGK-TIQVDNTDAEGR-TLIEFLLR	16	16	16	>sp|Q9CPY7|AMPL_MOUSE Cytosol aminopeptidase OS=Mus musculus GN=Lap3 PE=1 SV=3	1	16	16	16	44.3	44.3	44.3	56.141	519	301.89	28.9	27	18.7	25.4	20	35.8	31.6	29.5	30.4	25.8	24.1	39.1	17	15.8	26.4	23.1	20	26	26.2	38.9	32.2	31.8	28.1	24.3		335;376;445;462	70;267;338	Q9CPY7	124028616	66988	Lap3	Q9CPY7
737	Cytosolic 10-formyltetrahydrofolate dehydrogenase OS=Mus musculus GN=Aldh1l1 PE=1 SV=1	Cytosolic 10-formyltetrahydrofolate dehydrogenase OS=Mus musculus GN=Aldh1l1 PE=1 SV=1	AGLILFGNDDR-ANATEFGLASGVFTR-GSASSALELTEEELATAEAVR-GVVNILPGSGSLVGQR-FLFPEGIK	5	5	4	>sp|Q8R0Y6|AL1L1_MOUSE Cytosolic 10-formyltetrahydrofolate dehydrogenase OS=Mus musculus GN=Aldh1l1 PE=1 SV=1	1	5	5	4	7.9	7.9	7	98.708	902	4.419	0	2.5	0.9	2.5	0	0.9	2.1	0.9	0	0.9	0	0	0	0	0.9	0.9	0	1.2	2.5	2.5	2.5	0	6.1	5.5				Q8R0Y6	24418394	107747	Aldh1l1	Q8R0Y6
738	Cytosolic 5'-nucleotidase 3A OS=Mus musculus GN=Nt5c3a PE=1 SV=4	Cytosolic 5'-nucleotidase 3A OS=Mus musculus GN=Nt5c3a PE=1 SV=4	DNSNIILLGDSQGDLR-EESLEVVNSILQK-EGYENFFGK-EQYYAIEVDPVLTVEEK-IGYLNDRVDELLEK-LQQHGIPVFIFSAGIGDVLEEVIR-NTDYFSQLK-SHGLLIEQGIPK-VEEIICGLIK	9	9	9	>sp|Q9D020|5NT3A_MOUSE Cytosolic 5-nucleotidase 3A OS=Mus musculus GN=Nt5c3a PE=1 SV=4	1	9	9	9	37.5	37.5	37.5	37.252	331	68.064	11.5	19.3	19.3	17.8	11.5	8.5	15.1	22.1	4.8	16.9	16.6	19.3	11.5	16.9	7.6	29.3	14.8	18.1	19.3	31.7	19.6	7.6	27.5	15.7		68		Q9D020	117949805	107569	Nt5c3a	Q9D020
739	Cytosolic acyl coenzyme A thioester hydrolase OS=Mus musculus GN=Acot7 PE=1 SV=2	Cytosolic acyl coenzyme A thioester hydrolase OS=Mus musculus GN=Acot7 PE=1 SV=2	ATLWYVPLSLK-NVDKVLEVPPIVYLR-TNIVTASVDAINFHDK-VLEVPPIVYLR	4	4	4	>sp|Q91V12|BACH_MOUSE Cytosolic acyl coenzyme A thioester hydrolase OS=Mus musculus GN=Acot7 PE=1 SV=2	1	4	4	4	11	11	11	42.536	381	10.43	10	11	11	10	11	10	11	11	6.8	6.8	11	11	7.1	11	10	11	0	10	11	11	4.2	6.8	11	4.2				Q91V12	28376965	70025	Acot7	Q91V12
740	Cytosolic endo-beta-N-acetylglucosaminidase OS=Mus musculus GN=Engase PE=2 SV=1	Cytosolic endo-beta-N-acetylglucosaminidase OS=Mus musculus GN=Engase PE=2 SV=1	EGFLVPQAEWGK-LGEIQVVDASSLLAPLPR-LVQIAQFFR	3	3	3	>sp|Q8BX80|ENASE_MOUSE Cytosolic endo-beta-N-acetylglucosaminidase OS=Mus musculus GN=Engase PE=2 SV=1	1	3	3	3	5.3	5.3	5.3	82.944	734	6.021	3.7	2.9	1.6	0	3.7	1.2	0	3.7	1.2	2.5	1.2	2.5	3.7	1.2	0	1.2	1.2	1.2	1.2	1.6	0	3.7	2.5	1.6				Q8BX80	81897907	217364	Engase	Q8BX80
742	Cytosolic Fe-S cluster assembly factor NUBP2 OS=Mus musculus GN=Nubp2 PE=1 SV=1	Cytosolic Fe-S cluster assembly factor NUBP2 OS=Mus musculus GN=Nubp2 PE=1 SV=1	AEPGNLAGVR-LAGVPFLGSVPLDSQLTR-SLEEGRDFIQEFPK	3	3	3	>sp|Q9R061|NUBP2_MOUSE Cytosolic Fe-S cluster assembly factor NUBP2 OS=Mus musculus GN=Nubp2 PE=1 SV=1	1	3	3	3	15.3	15.3	15.3	29.518	275	7.3546	6.5	0	6.5	6.5	11.6	11.6	0	6.5	15.3	6.5	11.6	6.5	6.5	11.6	11.6	11.6	11.6	11.6	11.6	11.6	6.5	6.5	6.5	6.5				Q9R061	13632128	26426	Nubp2	Q9R061
743	Cytosolic non-specific dipeptidase OS=Mus musculus GN=Cndp2 PE=1 SV=1	Cytosolic non-specific dipeptidase OS=Mus musculus GN=Cndp2 PE=1 SV=1	AVFQYIDENQDR-AVFQYIDENQDRYVK-EGGSIPVTLTFQEATGK-FAELQSPNK-FCLEGMEESGSEGLDELIFAQK-GSTDDKGPVAGWMNALEAYQK-ILIPGINDAVAPVTDEEHALYDHIDFDMEEFAK-KLAEWVAIQSVSAWPEK-LAEWVAIQSVSAWPEK-LAEWVAIQSVSAWPEKR-LGGSVELVDIGK-LNYIEGTK-LPDGSEIPLPPILLGK-LVPDMIPEVVSEQVSSYLSK-LVPDMIPEVVSEQVSSYLSKK-MLAAYLYEVSQLKN-NVMLLPVGSADDGAHSQNEK-QKLPDGSEIPLPPILLGK-TGQEIPVNLR-TVFGVEPDLTR-WRYPSLSLHGIEGAFSGSGAK-YPSLSLHGIEGAFSGSGAK	22	22	22	>sp|Q9D1A2|CNDP2_MOUSE Cytosolic non-specific dipeptidase OS=Mus musculus GN=Cndp2 PE=1 SV=1	1	22	22	22	56.8	56.8	56.8	52.767	475	323.31	45.3	25.1	33.3	39.8	36.8	44.8	40.4	37.7	34.3	36.6	35.6	37.5	24.4	18.7	28.2	49.3	30.5	25.3	40.2	56.4	29.1	37.5	43.6	47.4		161	433;462	Q9D1A2	23396508	66054	Cndp2	Q9D1A2
745	Cytosolic purine 5'-nucleotidase OS=Mus musculus GN=Nt5c2 PE=1 SV=2	Cytosolic purine 5'-nucleotidase OS=Mus musculus GN=Nt5c2 PE=1 SV=2	GLVFDTLYGNLLK-KPLFFGEGTVLR-LVSIGYPQELLSFAYDSTFPTR-TFLVIPELAQELHVWTDK-VFLATNSDYK	5	5	5	>sp|Q3V1L4|5NTC_MOUSE Cytosolic purine 5-nucleotidase OS=Mus musculus GN=Nt5c2 PE=1 SV=2	1	5	5	5	13.4	13.4	13.4	64.808	560	16.911	4.5	2.1	4.1	2.1	3.9	7.7	4.5	9.5	11.6	9.5	2.1	7.7	4.5	0	4.5	11.1	7.7	0	4.5	11.6	6.2	9.5	7.7	5.4				Q3V1L4	160380525	76952	Nt5c2	Q3V1L4
746	D-3-phosphoglycerate dehydrogenase OS=Mus musculus GN=Phgdh PE=1 SV=3	D-3-phosphoglycerate dehydrogenase OS=Mus musculus GN=Phgdh PE=1 SV=3	AGTGVDNVDLEAATR-GGIVDEGALLR-GQPLLVFR-GTIQVVTQGTSLK-ILQDGGLQVVEK-KILQDGGLQVVEK-NAGTCLSPAVIVGLLR-QADVNLVNAK-QNLSKEELIAELQDCEGLIVR-TLGILGLGR-VLISDSLDPCCR-VTADVINAAEK	12	12	12	>sp|Q61753|SERA_MOUSE D-3-phosphoglycerate dehydrogenase OS=Mus musculus GN=Phgdh PE=1 SV=3	1	12	12	12	26.1	26.1	26.1	56.585	533	178.41	22.1	17.4	22.1	18.4	19.9	23.6	19.9	23.8	23.8	19.9	15.9	23.8	15.4	19.9	19.7	12.9	19.9	17.4	19.7	22.3	16.9	15.9	22.1	26.1		18;19;48;369		Q61753	55584180	236539	Phgdh	Q61753
747	DAZ-associated protein 1 OS=Mus musculus GN=Dazap1 PE=2 SV=2	DAZ-associated protein 1 OS=Mus musculus GN=Dazap1 PE=2 SV=2	LFVGGLDWSTTQETLR-NQAPGQPGASQWGSR	2	2	2	>sp|Q9JII5|DAZP1_MOUSE DAZ-associated protein 1 OS=Mus musculus GN=Dazap1 PE=2 SV=2	1	2	2	2	7.6	7.6	7.6	43.214	406	25.286	7.6	3.7	7.6	7.6	7.6	7.6	7.6	7.6	7.6	7.6	7.6	7.6	7.6	7.6	7.6	7.6	3.9	7.6	7.6	7.6	3.9	7.6	7.6	7.6				Q9JII5	44887872	70248	Dazap1	Q9JII5
748	DCC-interacting protein 13-alpha OS=Mus musculus GN=Appl1 PE=1 SV=1	DCC-interacting protein 13-alpha OS=Mus musculus GN=Appl1 PE=1 SV=1	EVFQIASNDHDAAINR-LIDPQTQVTR-QIYLSENPEETAAR-SETEDSILHQLFIVR	4	4	4	>sp|Q8K3H0|DP13A_MOUSE DCC-interacting protein 13-alpha OS=Mus musculus GN=Appl1 PE=1 SV=1	1	4	4	4	7.8	7.8	7.8	79.327	707	7.0246	6.4	1.4	1.4	5.5	7.8	2.3	3.7	5.5	1.4	2	2.3	3.5	2	0	3.7	2.1	2	4.1	3.5	3.4	3.5	0	3.4	7.8				Q8K3H0	61212993	72993	Appl1	Q8K3H0
749	DCN1-like protein 1 OS=Mus musculus GN=Dcun1d1 PE=2 SV=1	DCN1-like protein 1 OS=Mus musculus GN=Dcun1d1 PE=2 SV=1	DFYQFTFNFAK-FLDLWNK-LDVATDNFFQNPELYIR-QFMIFTQSSEK	4	4	4	>sp|Q9QZ73|DCNL1_MOUSE DCN1-like protein 1 OS=Mus musculus GN=Dcun1d1 PE=2 SV=1	1	4	4	4	17.8	17.8	17.8	30.097	259	15.227	6.6	6.9	6.6	6.6	9.3	10.8	0	9.3	17.8	6.9	9.3	13.5	9.3	6.6	4.2	10.8	9.3	9.3	10.8	9.3	10.8	9.3	9.3	9.3			16	Q9QZ73	73919223	114893	Dcun1d1	Q9QZ73
750	D-dopachrome decarboxylase OS=Mus musculus GN=Ddt PE=1 SV=3	D-dopachrome decarboxylase OS=Mus musculus GN=Ddt PE=1 SV=3	FFPLEAWQIGK-FLTEELSLDQDR-GTVMTFL-IPAGLENR-LCAATATILDKPEDR-PFVELETNLPASR-STEPCAHLLVSSIGVVGTAEQNR	7	7	7	>sp|O35215|DOPD_MOUSE D-dopachrome decarboxylase OS=Mus musculus GN=Ddt PE=1 SV=3	1	7	7	7	75.4	75.4	75.4	13.077	118	83.598	50	50	69.5	55.9	50	43.2	55.9	55.9	43.2	69.5	43.2	62.7	30.5	66.1	50	37.3	55.9	50	75.4	75.4	66.1	50	62.7	55.9		24;57	115	O35215	3122022	13202	Ddt	O35215
751	DDRGK domain-containing protein 1 OS=Mus musculus GN=Ddrgk1 PE=1 SV=2	DDRGK domain-containing protein 1 OS=Mus musculus GN=Ddrgk1 PE=1 SV=2	AAAADGEPLHNEEER-FIYITPEELAAVANFIR-IQDLLTEGTLTGVIDDR-VAWEDGDENVGQTVIPAQEEEGIEKPAEVHPTGK	4	4	4	>sp|Q80WW9|DDRGK_MOUSE DDRGK domain-containing protein 1 OS=Mus musculus GN=Ddrgk1 PE=1 SV=2	1	4	4	4	26.3	26.3	26.3	35.977	315	13.779	15.6	5.4	10.8	16.2	10.2	5.4	21.6	5.4	10.8	10.2	5.4	10.8	4.8	0	5.4	21.6	0	0	5.4	21.6	10.8	10.2	10.8	16.2				Q80WW9	37076965	77006	Ddrgk1	Q80WW9
753	Decorin OS=Mus musculus GN=Dcn PE=2 SV=1	Decorin OS=Mus musculus GN=Dcn PE=2 SV=1	ASYSAVSLYGNPVR-DLHTLILVNNK-KASYSAVSLYGNPVR-KSDFNGLNNVLVIELGGNPLK-NSGIENGAFQGLK-YWEIFPNTFR	6	6	6	>sp|P28654|PGS2_MOUSE Decorin OS=Mus musculus GN=Dcn PE=2 SV=1	1	6	6	6	19.8	19.8	19.8	39.809	354	18.486	19.8	5.9	13.8	8.8	7.1	6.8	16.1	13	16.7	9.6	6.8	7.9	13.8	9.9	11	9.6	16.1	7.1	10.7	16.7	13.8	10.2	19.8	19.8				P28654	129952	13179	Dcn	P28654
754	Dedicator of cytokinesis protein 10 OS=Mus musculus GN=Dock10 PE=1 SV=3	Dedicator of cytokinesis protein 10 OS=Mus musculus GN=Dock10 PE=1 SV=3	LNLFSLDPDIDTLK-SANIPDPLTPSESIR-SQTLPIIR-VSTFVVSTVNTQDPHVNAFFR	4	4	4	>sp|Q8BZN6|DOC10_MOUSE Dedicator of cytokinesis protein 10 OS=Mus musculus GN=Dock10 PE=1 SV=3	1	4	4	4	2.7	2.7	2.7	245.76	2150	5.7122	1.3	1.6	1.6	1.6	2	1	2	2	1.6	0.4	2	0.7	0.4	0	1	0.7	0	0.7	0.7	1.6	0.7	1	2	2				Q8BZN6	122065166	210293	Dock10	Q8BZN6
755	Dedicator of cytokinesis protein 11 OS=Mus musculus GN=Dock11 PE=1 SV=1	Dedicator of cytokinesis protein 11 OS=Mus musculus GN=Dock11 PE=1 SV=1	KQDTVETPVGFAWVPLLK-LTGLSEISLR-NHLYVYPLQLK-YAEIPDESR-YTAISVIK	5	5	5	>sp|A2AF47|DOC11_MOUSE Dedicator of cytokinesis protein 11 OS=Mus musculus GN=Dock11 PE=1 SV=1	1	5	5	5	2.7	2.7	2.7	237.77	2073	6.3014	0	1.4	0.9	1.3	0.4	1.3	1.3	1.4	1.7	0	2.7	0.9	1.3	0	0.9	0.9	0	0.9	0.9	0.9	0.9	0.4	1.3	0				A2AF47	158514041	75974	Dock11	A2AF47
756	Dedicator of cytokinesis protein 2 OS=Mus musculus GN=Dock2 PE=1 SV=3	Dedicator of cytokinesis protein 2 OS=Mus musculus GN=Dock2 PE=1 SV=3	ALEYVFK-DILLPVITK-DLIAWQIPFLGAGIK-DVFSISTLVCSTK-ETLYETIIGYFDK-FENEIILK-GEQCEPILR-IFLICQIVR-ISSSPTHSLYVFVR-LIGFSIR-LSQGIFPTSFIHLK-LSQTFFQVSDGDKK-LTQNVGLLGLLK-MLVGDIIQIR-NDIYITLLQGDFDK-NDIYITLLQGDFDKYTK-NKPVPDQIINFYK-SQLLSGTLPK-SQLLSGTLPKDELK-SSSSVGGLSVSSR-SVENFVSLVK-TKPDYFAVGYYGQGFPSFLR-TLFSQLYEGK-TSFLTAYK-TTILLQVAALK-VEEEPISPGSTLPEVK-VVFTDLGNK-YIPSVLHDVETVFDAK	28	28	28	>sp|Q8C3J5|DOCK2_MOUSE Dedicator of cytokinesis protein 2 OS=Mus musculus GN=Dock2 PE=1 SV=3	1	28	28	28	17	17	17	211.7	1828	81.887	8	8.9	11.5	6.6	11.4	9.4	11.5	10	10.4	11.3	14.6	12.3	8	5	10.8	8.8	7.9	11.9	7.7	8.6	5.3	11.8	14	11.9		297;607;730	385	Q8C3J5	341940505	94176	Dock2	Q8C3J5
757	Dedicator of cytokinesis protein 8 OS=Mus musculus GN=Dock8 PE=1 SV=4	Dedicator of cytokinesis protein 8 OS=Mus musculus GN=Dock8 PE=1 SV=4	AHTPSIDPSSQAR-ATTLATNIFFK-DSLLGGVLR-EILEFPIR-ESTDVEPGVGR-GFVFNLIK-NLLYVYPQR-QGASGESLLGYSWLPILLNER-SGGPTTVVPDPR-SSGPEFLQEVYTAITYHNK-TLSLEENGVGSNFK-VPLQNPPIK	12	12	12	>sp|Q8C147|DOCK8_MOUSE Dedicator of cytokinesis protein 8 OS=Mus musculus GN=Dock8 PE=1 SV=4	1	12	12	12	6.9	6.9	6.9	238.98	2100	20.161	1.4	1.9	4.8	4.1	4.4	2.8	4	5	3.4	3.6	5.9	1.9	2.2	1	3.2	1.9	1.6	1.4	3.1	1.8	1.3	4.1	5.3	3.5				Q8C147	158937440	76088	Dock8	Q8C147
758	Dehydrogenase/reductase SDR family member 1 OS=Mus musculus GN=Dhrs1 PE=2 SV=1	Dehydrogenase/reductase SDR family member 1 OS=Mus musculus GN=Dhrs1 PE=2 SV=1	AGATVYITGR-ATAQEAQSLGGR-CVVALATDPNILNLSGK-EDTPEDPLFK-GIALQLCK-GQVCVVTGASR-GRLDVLVNNAYAGVQAILNTTNK-HGVSYVSLWPGLVQTEMVK-LDVLVNNAYAGVQAILNTTNK-SFWEVPASIWDDINNVGLR-SLFEQVDR-WVVTLYNSK	12	12	12	>sp|Q99L04|DHRS1_MOUSE Dehydrogenase/reductase SDR family member 1 OS=Mus musculus GN=Dhrs1 PE=2 SV=1	1	12	12	12	46.6	46.6	46.6	34.005	313	74.511	40.3	25.2	23.3	14.7	22	31.3	21.4	24.6	22.7	19.2	34.8	34.8	12.5	7	31.3	37.7	15.3	24.6	10.5	34.8	9.9	15	34.5	28.1		10;28;235	200	Q99L04	46397412	52585	Dhrs1	Q99L04
759	Dehydrogenase/reductase SDR family member 11 OS=Mus musculus GN=Dhrs11 PE=2 SV=1	Dehydrogenase/reductase SDR family member 11 OS=Mus musculus GN=Dhrs11 PE=2 SV=1	ALVQQGLK-ATCISPGLVETQFAFK-QELLEAQTHIR-SAGYPGTLIPYR-TVGNIEELAAECK-YAVTALTEGLR	6	6	6	>sp|Q3U0B3|DHR11_MOUSE Dehydrogenase/reductase SDR family member 11 OS=Mus musculus GN=Dhrs11 PE=2 SV=1	1	6	6	6	27.3	27.3	27.3	28.274	260	15.926	18.1	11.9	11.9	8.8	16.9	7.7	0	18.1	10.8	7.7	8.8	11.9	7.3	5	7.7	11.9	18.1	16.2	23.1	20	8.8	18.1	11.9	7.3		55;195		Q3U0B3	85542060	192970	Dhrs11	Q3U0B3
760	Dehydrogenase/reductase SDR family member 4 OS=Mus musculus GN=Dhrs4 PE=1 SV=3	Dehydrogenase/reductase SDR family member 4 OS=Mus musculus GN=Dhrs4 PE=1 SV=3	FSSVLWEEK-NFAAELAPK-TALLGLTK-VALVTASTDGIGFAIAR	4	4	4	>sp|Q99LB2|DHRS4_MOUSE Dehydrogenase/reductase SDR family member 4 OS=Mus musculus GN=Dhrs4 PE=1 SV=3	1	4	4	4	15.4	15.4	15.4	29.884	279	6.6373	6.1	2.9	6.1	6.1	2.9	9	0	6.1	9	2.9	2.9	6.1	6.1	2.9	0	2.9	6.1	2.9	3.2	12.2	9.3	2.9	9.3	2.9				Q99LB2	408360290	28200	Dhrs4	Q99LB2
761	Dehydrogenase/reductase SDR family member 7 OS=Mus musculus GN=Dhrs7 PE=2 SV=2	Dehydrogenase/reductase SDR family member 7 OS=Mus musculus GN=Dhrs7 PE=2 SV=2	AVLQEFGK-DILVLPLDLTDTSSHEAATK-EKDILVLPLDLTDTSSHEAATK-NNLDPDLPYK-SLVLETNLDVFK	5	5	5	>sp|Q9CXR1|DHRS7_MOUSE Dehydrogenase/reductase SDR family member 7 OS=Mus musculus GN=Dhrs7 PE=2 SV=2	1	5	5	5	15.4	15.4	15.4	38.167	338	9.3288	13	3	6.5	9.5	9.5	9.5	9.5	13	9.5	5.9	11.8	13	5.9	0	9.5	6.5	0	9.5	3	5.9	6.5	5.9	13	3				Q9CXR1	34395851	66375	Dhrs7	Q9CXR1
762	Deleted in malignant brain tumors 1 protein OS=Mus musculus GN=Dmbt1 PE=1 SV=2	Deleted in malignant brain tumors 1 protein OS=Mus musculus GN=Dmbt1 PE=1 SV=2	AVVSNGIIK-DDTYQSYSSPSPR-FITDHSITAR-FPSVYLQCK-QLGCGLAVSAPGNAR-QLGCGLAVSAPGSAR-SLDLAVEDVK	7	7	7	>sp|Q60997|DMBT1_MOUSE Deleted in malignant brain tumors 1 protein OS=Mus musculus GN=Dmbt1 PE=1 SV=2	1	7	7	7	5.3	5.3	5.3	226.81	2085	26.059	0	0	2.6	0	0	1.2	3.7	0.4	0	4.3	2.9	0.5	0.5	0.5	0.7	0.4	0.5	0	0	0.5	0	2.2	2.9	5.3		80;506;1978		Q60997	85687557	12945	Dmbt1	Q60997
763	Delta(3,5)-Delta(2,4)-dienoyl-CoA isomerase, mitochondrial OS=Mus musculus GN=Ech1 PE=1 SV=1	Delta(3,5)-Delta(2,4)-dienoyl-CoA isomerase, mitochondrial OS=Mus musculus GN=Ech1 PE=1 SV=1	INLIYSR-VFQDKDAMLNAAFALAADISSK-VIGNQSLVNELTFSAR-YCTQDAFFQIK	4	4	4	>sp|O35459|ECH1_MOUSE Delta(3,5)-Delta(2,4)-dienoyl-CoA isomerase, mitochondrial OS=Mus musculus GN=Ech1 PE=1 SV=1	1	4	4	4	17.1	17.1	17.1	36.118	327	17.695	7	5.5	8.3	7	7	3.4	0	10.4	4.9	7	8.3	5.5	7	7	8.3	4.9	7	8.3	10.4	15	7	7	7	7		186		O35459	3122065	51798	Ech1	O35459
764	Delta-1-pyrroline-5-carboxylate dehydrogenase, mitochondrial OS=Mus musculus GN=Aldh4a1 PE=1 SV=3	Delta-1-pyrroline-5-carboxylate dehydrogenase, mitochondrial OS=Mus musculus GN=Aldh4a1 PE=1 SV=3	IKVGDPAEDFGTFFSAVIDAK-NFHFVHSSADVDSVVSGTLR-STGSVVGQQPFGGAR-VGDPAEDFGTFFSAVIDAK-VTNEPILAFSQGSPER	5	5	5	>sp|Q8CHT0|AL4A1_MOUSE Delta-1-pyrroline-5-carboxylate dehydrogenase, mitochondrial OS=Mus musculus GN=Aldh4a1 PE=1 SV=3	1	5	5	5	12.8	12.8	12.8	61.84	562	16.993	12.8	5.5	6.4	6.6	12.5	10.1	8.9	12.8	6	12.8	3.6	9.3	0	0	3.4	10.1	12.8	5.5	12.8	6.4	6.4	12.8	10.1	10.1				Q8CHT0	341940605	212647	Aldh4a1	Q8CHT0
765	Delta-1-pyrroline-5-carboxylate synthase OS=Mus musculus GN=Aldh18a1 PE=1 SV=2	Delta-1-pyrroline-5-carboxylate synthase OS=Mus musculus GN=Aldh18a1 PE=1 SV=2	EAIQLVNTR-FASYLTFSPSEVK-GPVGLEGLLTTK-IIDLIIPR-LASIVEQVSVLQNQGR-LIDIFYPGDQQSVTFGTK-LNSLAIGLR-NLNGTLHELLR-QIAASSQESVGR-SWSNIPFITVPLSR-TDLLIVLSDVEGLFDSPPGSDDAK-TPLFDQIIDMLR-YLHENLPVPQR	13	13	13	>sp|Q9Z110|P5CS_MOUSE Delta-1-pyrroline-5-carboxylate synthase OS=Mus musculus GN=Aldh18a1 PE=1 SV=2	1	13	13	13	21.3	21.3	21.3	87.265	795	23.703	7.5	6.4	9.1	8.9	7.5	10.4	11.1	6.8	4.8	10.6	5	3.6	6	4.3	12.5	14	13.1	2.6	4.8	15.6	7.5	8.2	11.9	6.7				Q9Z110	341941220	56454	Aldh18a1	Q9Z110
766	Delta-aminolevulinic acid dehydratase OS=Mus musculus GN=Alad PE=1 SV=1	Delta-aminolevulinic acid dehydratase OS=Mus musculus GN=Alad PE=1 SV=1	AGADIIITYFAPQLLK-CVLIFGVPSR-CYQLPPGAR-DAAQSSPAFGDR-DAAQSSPAFGDRR-DEQGSAADSEDSPTIEAVR-FASCFYGPFR-LAEVALAYAK-RAGADIIITYFAPQLLK-SWQTAASTVSASNLIYPIFVTDVPDDVQPIASLPGVAR-TAVLETMTAFR-VPKDEQGSAADSEDSPTIEAVR-VSVMSYSAK-YGVNQLEEMLRPLVEAGLR	14	14	14	>sp|P10518|HEM2_MOUSE Delta-aminolevulinic acid dehydratase OS=Mus musculus GN=Alad PE=1 SV=1	1	14	14	14	50.9	50.9	50.9	36.023	330	323.31	45.5	42.1	27.9	27.3	45.5	33.6	27.6	30.9	30.6	30.3	45.5	30.3	24.5	21.2	30	44.8	27.3	33.6	22.1	50.9	30	24.5	42.1	22.7		75;203;223	64;194;304	P10518	122834	17025	Alad	P10518
767	Density-regulated protein OS=Mus musculus GN=Denr PE=2 SV=1	Density-regulated protein OS=Mus musculus GN=Denr PE=2 SV=1	LDADYPLR-WPEVDDDSIEDLGEVKK	2	2	2	>sp|Q9CQJ6|DENR_MOUSE Density-regulated protein OS=Mus musculus GN=Denr PE=2 SV=1	1	2	2	2	12.6	12.6	12.6	22.166	198	2.8324	12.6	0	12.6	0	12.6	4	0	0	4	4	4	4	4	0	4	4	4	0	4	0	4	4	4	8.6				Q9CQJ6	13626272	68184	Denr	Q9CQJ6
768	Deoxycytidine kinase OS=Mus musculus GN=Dck PE=1 SV=1	Deoxycytidine kinase OS=Mus musculus GN=Dck PE=1 SV=1	AQLASLNGK-ISIEGNIAAGK-QASEDWEVVPEPVAR-STFVNILK	4	4	4	>sp|P43346|DCK_MOUSE Deoxycytidine kinase OS=Mus musculus GN=Dck PE=1 SV=1	1	4	4	4	16.5	16.5	16.5	30.367	260	6.9652	10	3.5	12.3	12.3	3.5	16.5	0	12.3	8.8	10.8	9.2	6.5	3.1	0	12.3	3.5	16.5	0	3.1	12.3	5.8	6.5	7.7	10.8				P43346	1169273	13178	Dck	P43346
[truncated: 2,062 more rows]
[truncated: 24 more columns]

## Sheet: Quantification
Age-related proteomic changes in response to an acute innate immune challenge in mice
François Criscuolo1‡, Gabriele Sorci2, Margaux Behaim-Delarbre1, Sandrine Zahn1, Bruno Faivre2 and Fabrice Bertile1‡
[truncated: 1,978 more rows]

## Sheet: 233 differential proteins
Age-related proteomic changes in response to an acute innate immune challenge in mice
[truncated: 246 more rows]
